# Supplementary material for: Acoustic monitoring indicates a correlation between calling and spawning in captive spotted seatrout (Cynoscion nebulosus)
Source: PeerJ. 2017 Feb 9;5:e2944. doi: 10.7717/peerj.2944 (PMC5345829; doi:10.7717/peerj.2944)
Supplement: Data S4 [file peerj-05-2944-s004.xls]

## Sheet: 1081_Tank2
Date/Time of Sample	Adjusted Sound Pressure Level	Combined Date and Time	Category	Drums	Grunts	Trains	Totals
2012-04-13 16:00:00	108.933	2012-04-13 16:00:00	49	0	0	0	0
2012-04-13 16:20:00	108.809	2012-04-13 16:20:00	50	0	0	0	0
2012-04-13 16:40:00	109.058	2012-04-13 16:40:00	51	0	0	0	0
2012-04-13 17:00:00	108.837	2012-04-13 17:00:00	52	0	0	0	0
2012-04-13 17:20:00	108.907	2012-04-13 17:20:00	53	0	0	0	0
2012-04-13 17:40:00	109.049	2012-04-13 17:40:00	54	0	0	0	0
2012-04-13 18:00:00	109.04	2012-04-13 18:00:00	55	0	0	0	0
2012-04-13 18:20:00	108.86	2012-04-13 18:20:00	56	0	0	0	0
2012-04-13 18:40:00	108.943	2012-04-13 18:40:00	57	0	0	0	0
2012-04-13 19:00:00	108.911	2012-04-13 19:00:00	58	0	0	0	0
2012-04-13 19:20:00	109.059	2012-04-13 19:20:00	59	0	0	0	0
2012-04-13 19:40:00	109.22	2012-04-13 19:40:00	60	0	0	0	0
2012-04-13 20:00:00	109.156	2012-04-13 20:00:00	61	0	0	0	0
2012-04-13 20:20:00	109.136	2012-04-13 20:20:00	62	0	0	0	0
2012-04-13 20:40:00	109.229	2012-04-13 20:40:00	63	0	0	0	0
2012-04-13 21:00:00	109.263	2012-04-13 21:00:00	64	0	0	0	0
2012-04-13 21:20:00	109.298	2012-04-13 21:20:00	65	0	0	0	0
2012-04-13 21:40:00	109.579	2012-04-13 21:40:00	66	0	0	0	0
2012-04-13 22:00:00	109.373	2012-04-13 22:00:00	67	0	0	0	0
2012-04-13 22:20:00	109.195	2012-04-13 22:20:00	68	0	0	0	0
2012-04-13 22:40:00	109.249	2012-04-13 22:40:00	69	0	0	0	0
2012-04-13 23:00:00	109.299	2012-04-13 23:00:00	70	0	0	0	0
2012-04-13 23:20:00	109.258	2012-04-13 23:20:00	71	0	0	0	0
2012-04-13 23:40:00	109.316	2012-04-13 23:40:00	72	0	0	0	0
2012-04-14	109.329	2012-04-14	1	0	0	0	0
2012-04-14 00:20:00	109.271	2012-04-14 00:20:00	2	0	0	0	0
2012-04-14 00:40:00	109.279	2012-04-14 00:40:00	3	0	0	0	0
2012-04-14 01:00:00	109.41	2012-04-14 01:00:00	4	0	0	0	0
2012-04-14 01:20:00	109.177	2012-04-14 01:20:00	5	0	0	0	0
2012-04-14 01:40:00	109.41	2012-04-14 01:40:00	6	0	0	0	0
2012-04-14 02:00:00	109.43	2012-04-14 02:00:00	7	0	0	0	0
2012-04-14 02:20:00	109.268	2012-04-14 02:20:00	8	0	0	0	0
2012-04-14 02:40:00	109.219	2012-04-14 02:40:00	9	0	0	0	0
2012-04-14 03:00:00	109.295	2012-04-14 03:00:00	10	0	0	0	0
2012-04-14 03:20:00	109.209	2012-04-14 03:20:00	11	0	0	0	0
2012-04-14 03:40:00	109.023	2012-04-14 03:40:00	12	0	0	0	0
2012-04-14 04:00:00	108.842	2012-04-14 04:00:00	13	0	0	0	0
2012-04-14 04:20:00	109.02	2012-04-14 04:20:00	14	0	0	0	0
2012-04-14 04:40:00	109.041	2012-04-14 04:40:00	15	0	0	0	0
2012-04-14 05:00:00	109.027	2012-04-14 05:00:00	16	0	0	0	0
2012-04-14 05:20:00	109.062	2012-04-14 05:20:00	17	0	0	0	0
2012-04-14 05:40:00	109.115	2012-04-14 05:40:00	18	0	0	0	0
2012-04-14 06:00:00	109.036	2012-04-14 06:00:00	19	0	0	0	0
2012-04-14 06:20:00	109.177	2012-04-14 06:20:00	20	0	0	0	0
2012-04-14 06:40:00	109.035	2012-04-14 06:40:00	21	0	0	0	0
2012-04-14 07:00:00	108.89	2012-04-14 07:00:00	22	0	0	0	0
2012-04-14 07:20:00	108.934	2012-04-14 07:20:00	23	0	0	0	0
2012-04-14 07:40:00	109.058	2012-04-14 07:40:00	24	0	0	0	0
2012-04-14 08:00:00	109.054	2012-04-14 08:00:00	25	0	0	0	0
2012-04-14 08:20:00	109.098	2012-04-14 08:20:00	26	0	0	0	0
2012-04-14 08:40:00	109.15	2012-04-14 08:40:00	27	0	0	0	0
2012-04-14 09:00:00	109.265	2012-04-14 09:00:00	28	0	0	0	0
2012-04-14 09:20:00	109.285	2012-04-14 09:20:00	29	0	0	0	0
2012-04-14 09:40:00	109.156	2012-04-14 09:40:00	30	0	0	0	0
2012-04-14 10:00:00	109.16	2012-04-14 10:00:00	31	0	0	0	0
2012-04-14 10:20:00	109.069	2012-04-14 10:20:00	32	0	0	0	0
2012-04-14 10:40:00	109.066	2012-04-14 10:40:00	33	0	0	0	0
2012-04-14 11:00:00	109.098	2012-04-14 11:00:00	34	0	0	0	0
2012-04-14 11:20:00	109.082	2012-04-14 11:20:00	35	0	0	0	0
2012-04-14 11:40:00	109.325	2012-04-14 11:40:00	36	0	0	0	0
2012-04-14 12:00:00	109.38	2012-04-14 12:00:00	37	0	0	0	0
2012-04-14 12:20:00	109.275	2012-04-14 12:20:00	38	0	0	0	0
2012-04-14 12:40:00	109.295	2012-04-14 12:40:00	39	0	0	0	0
2012-04-14 13:00:00	109.237	2012-04-14 13:00:00	40	0	0	0	0
2012-04-14 13:20:00	109.296	2012-04-14 13:20:00	41	0	0	0	0
2012-04-14 13:40:00	109.237	2012-04-14 13:40:00	42	0	0	0	0
2012-04-14 14:00:00	109.143	2012-04-14 14:00:00	43	0	0	0	0
2012-04-14 14:20:00	109.384	2012-04-14 14:20:00	44	0	0	0	0
2012-04-14 14:40:00	109.472	2012-04-14 14:40:00	45	0	0	0	0
2012-04-14 15:00:00	109.301	2012-04-14 15:00:00	46	0	0	0	0
2012-04-14 15:20:00	109.469	2012-04-14 15:20:00	47	0	0	0	0
2012-04-14 15:40:00	109.414	2012-04-14 15:40:00	48	0	0	0	0
2012-04-14 16:00:00	109.463	2012-04-14 16:00:00	49	0	0	0	0
2012-04-14 16:20:00	109.541	2012-04-14 16:20:00	50	0	0	0	0
2012-04-14 16:40:00	109.456	2012-04-14 16:40:00	51	0	0	0	0
2012-04-14 17:00:00	109.543	2012-04-14 17:00:00	52	0	0	0	0
2012-04-14 17:20:00	109.608	2012-04-14 17:20:00	53	0	0	0	0
2012-04-14 17:40:00	109.598	2012-04-14 17:40:00	54	0	0	0	0
2012-04-14 18:00:00	109.665	2012-04-14 18:00:00	55	0	0	0	0
2012-04-14 18:20:00	109.728	2012-04-14 18:20:00	56	0	0	0	0
2012-04-14 18:40:00	109.727	2012-04-14 18:40:00	57	0	0	0	0
2012-04-14 19:00:00	109.709	2012-04-14 19:00:00	58	0	0	0	0
2012-04-14 19:20:00	109.757	2012-04-14 19:20:00	59	0	0	0	0
2012-04-14 19:40:00	109.572	2012-04-14 19:40:00	60	0	0	0	0
2012-04-14 20:00:00	109.535	2012-04-14 20:00:00	61	0	0	0	0
2012-04-14 20:20:00	109.402	2012-04-14 20:20:00	62	0	0	0	0
2012-04-14 20:40:00	109.638	2012-04-14 20:40:00	63	0	0	0	0
2012-04-14 21:00:00	109.58	2012-04-14 21:00:00	64	0	0	0	0
2012-04-14 21:20:00	109.725	2012-04-14 21:20:00	65	0	0	0	0
2012-04-14 21:40:00	109.691	2012-04-14 21:40:00	66	0	0	0	0
2012-04-14 22:00:00	109.672	2012-04-14 22:00:00	67	0	0	0	0
2012-04-14 22:20:00	109.59	2012-04-14 22:20:00	68	0	0	0	0
2012-04-14 22:40:00	109.648	2012-04-14 22:40:00	69	0	0	0	0
2012-04-14 23:00:00	109.683	2012-04-14 23:00:00	70	0	0	0	0
2012-04-14 23:20:00	109.69	2012-04-14 23:20:00	71	0	0	0	0
2012-04-14 23:40:00	109.557	2012-04-14 23:40:00	72	0	0	0	0
2012-04-15	109.637	2012-04-15	1	0	0	0	0
2012-04-15 00:20:00	109.66	2012-04-15 00:20:00	2	0	0	0	0
2012-04-15 00:40:00	109.674	2012-04-15 00:40:00	3	0	0	0	0
2012-04-15 01:00:00	109.743	2012-04-15 01:00:00	4	0	0	0	0
2012-04-15 01:20:00	109.64	2012-04-15 01:20:00	5	0	0	0	0
2012-04-15 01:40:00	109.573	2012-04-15 01:40:00	6	0	0	0	0
2012-04-15 02:00:00	109.621	2012-04-15 02:00:00	7	0	0	0	0
2012-04-15 02:20:00	109.607	2012-04-15 02:20:00	8	0	0	0	0
2012-04-15 02:40:00	109.449	2012-04-15 02:40:00	9	0	0	0	0
2012-04-15 03:00:00	109.399	2012-04-15 03:00:00	10	0	0	0	0
2012-04-15 03:20:00	109.515	2012-04-15 03:20:00	11	0	0	0	0
2012-04-15 03:40:00	109.313	2012-04-15 03:40:00	12	0	0	0	0
2012-04-15 04:00:00	109.388	2012-04-15 04:00:00	13	0	0	0	0
2012-04-15 04:20:00	109.384	2012-04-15 04:20:00	14	0	0	0	0
2012-04-15 04:40:00	109.43	2012-04-15 04:40:00	15	0	0	0	0
2012-04-15 05:00:00	109.564	2012-04-15 05:00:00	16	0	0	0	0
2012-04-15 05:20:00	109.562	2012-04-15 05:20:00	17	0	0	0	0
2012-04-15 05:40:00	109.506	2012-04-15 05:40:00	18	0	0	0	0
2012-04-15 06:00:00	109.403	2012-04-15 06:00:00	19	0	0	0	0
2012-04-15 06:20:00	109.349	2012-04-15 06:20:00	20	0	0	0	0
2012-04-15 06:40:00	109.321	2012-04-15 06:40:00	21	0	0	0	0
2012-04-15 07:00:00	109.383	2012-04-15 07:00:00	22	0	0	0	0
2012-04-15 07:20:00	109.386	2012-04-15 07:20:00	23	0	0	0	0
2012-04-15 07:40:00	109.56	2012-04-15 07:40:00	24	0	0	0	0
2012-04-15 08:00:00	109.559	2012-04-15 08:00:00	25	0	0	0	0
2012-04-15 08:20:00	109.502	2012-04-15 08:20:00	26	0	0	0	0
2012-04-15 08:40:00	109.518	2012-04-15 08:40:00	27	0	0	0	0
2012-04-15 09:00:00	109.182	2012-04-15 09:00:00	28	0	0	0	0
2012-04-15 09:20:00	109.293	2012-04-15 09:20:00	29	0	0	0	0
2012-04-15 09:40:00	109.395	2012-04-15 09:40:00	30	0	0	0	0
2012-04-15 10:00:00	109.171	2012-04-15 10:00:00	31	0	0	0	0
2012-04-15 10:20:00	109.192	2012-04-15 10:20:00	32	0	0	0	0
2012-04-15 10:40:00	109.244	2012-04-15 10:40:00	33	0	0	0	0
2012-04-15 11:00:00	109.348	2012-04-15 11:00:00	34	0	0	0	0
2012-04-15 11:20:00	109.317	2012-04-15 11:20:00	35	0	0	0	0
2012-04-15 11:40:00	109.467	2012-04-15 11:40:00	36	0	0	0	0
2012-04-15 12:00:00	109.411	2012-04-15 12:00:00	37	0	0	0	0
2012-04-15 12:20:00	109.467	2012-04-15 12:20:00	38	0	0	0	0
2012-04-15 12:40:00	109.505	2012-04-15 12:40:00	39	0	0	0	0
2012-04-15 13:00:00	109.33	2012-04-15 13:00:00	40	0	0	0	0
2012-04-15 13:20:00	109.658	2012-04-15 13:20:00	41	0	0	0	0
2012-04-15 13:40:00	109.256	2012-04-15 13:40:00	42	0	0	0	0
2012-04-15 14:00:00	109.442	2012-04-15 14:00:00	43	0	0	0	0
2012-04-15 14:20:00	109.311	2012-04-15 14:20:00	44	0	0	0	0
2012-04-15 14:40:00	109.467	2012-04-15 14:40:00	45	0	0	0	0
2012-04-15 15:00:00	109.533	2012-04-15 15:00:00	46	0	0	0	0
2012-04-15 15:20:00	109.396	2012-04-15 15:20:00	47	0	0	0	0
2012-04-15 15:40:00	109.411	2012-04-15 15:40:00	48	0	0	0	0
2012-04-15 16:00:00	109.539	2012-04-15 16:00:00	49	0	0	0	0
2012-04-15 16:20:00	109.494	2012-04-15 16:20:00	50	0	0	0	0
2012-04-15 16:40:00	109.437	2012-04-15 16:40:00	51	0	0	0	0
2012-04-15 17:00:00	109.371	2012-04-15 17:00:00	52	0	0	0	0
2012-04-15 17:20:00	109.591	2012-04-15 17:20:00	53	0	0	0	0
2012-04-15 17:40:00	109.559	2012-04-15 17:40:00	54	0	0	0	0
2012-04-15 18:00:00	109.665	2012-04-15 18:00:00	55	0	0	0	0
2012-04-15 18:20:00	109.516	2012-04-15 18:20:00	56	0	0	0	0
2012-04-15 18:40:00	109.566	2012-04-15 18:40:00	57	0	0	0	0
2012-04-15 19:00:00	109.585	2012-04-15 19:00:00	58	0	0	0	0
2012-04-15 19:20:00	109.636	2012-04-15 19:20:00	59	0	0	0	0
2012-04-15 19:40:00	109.642	2012-04-15 19:40:00	60	0	0	0	0
2012-04-15 20:00:00	109.598	2012-04-15 20:00:00	61	0	0	0	0
2012-04-15 20:20:00	109.5	2012-04-15 20:20:00	62	0	0	0	0
2012-04-15 20:40:00	109.581	2012-04-15 20:40:00	63	0	0	0	0
2012-04-15 21:00:00	109.505	2012-04-15 21:00:00	64	0	0	0	0
2012-04-15 21:20:00	109.414	2012-04-15 21:20:00	65	0	0	0	0
2012-04-15 21:40:00	109.984	2012-04-15 21:40:00	66	0	0	0	0
2012-04-15 22:00:00	109.517	2012-04-15 22:00:00	67	0	0	0	0
2012-04-15 22:20:00	109.502	2012-04-15 22:20:00	68	0	0	0	0
2012-04-15 22:40:00	109.538	2012-04-15 22:40:00	69	0	0	0	0
2012-04-15 23:00:00	109.48	2012-04-15 23:00:00	70	0	0	0	0
2012-04-15 23:20:00	109.383	2012-04-15 23:20:00	71	0	0	0	0
2012-04-15 23:40:00	109.473	2012-04-15 23:40:00	72	0	0	0	0
2012-04-16	109.501	2012-04-16	1	0	0	0	0
2012-04-16 00:20:00	109.615	2012-04-16 00:20:00	2	0	0	0	0
2012-04-16 00:40:00	109.431	2012-04-16 00:40:00	3	0	0	0	0
2012-04-16 01:00:00	109.485	2012-04-16 01:00:00	4	0	0	0	0
2012-04-16 01:20:00	109.494	2012-04-16 01:20:00	5	0	0	0	0
2012-04-16 01:40:00	109.583	2012-04-16 01:40:00	6	0	0	0	0
2012-04-16 02:00:00	109.528	2012-04-16 02:00:00	7	0	0	0	0
2012-04-16 02:20:00	109.621	2012-04-16 02:20:00	8	0	0	0	0
2012-04-16 02:40:00	109.59	2012-04-16 02:40:00	9	0	0	0	0
2012-04-16 03:00:00	109.616	2012-04-16 03:00:00	10	0	0	0	0
2012-04-16 03:20:00	109.473	2012-04-16 03:20:00	11	0	0	0	0
2012-04-16 03:40:00	109.521	2012-04-16 03:40:00	12	0	0	0	0
2012-04-16 04:00:00	109.503	2012-04-16 04:00:00	13	0	0	0	0
2012-04-16 04:20:00	109.429	2012-04-16 04:20:00	14	0	0	0	0
2012-04-16 04:40:00	109.528	2012-04-16 04:40:00	15	0	0	0	0
2012-04-16 05:00:00	109.708	2012-04-16 05:00:00	16	0	0	0	0
2012-04-16 05:20:00	109.577	2012-04-16 05:20:00	17	0	0	0	0
2012-04-16 05:40:00	109.577	2012-04-16 05:40:00	18	0	0	0	0
2012-04-16 06:00:00	109.562	2012-04-16 06:00:00	19	0	0	0	0
2012-04-16 06:20:00	109.65	2012-04-16 06:20:00	20	0	0	0	0
2012-04-16 06:40:00	109.524	2012-04-16 06:40:00	21	0	0	0	0
2012-04-16 07:00:00	109.604	2012-04-16 07:00:00	22	0	0	0	0
2012-04-16 07:20:00	109.586	2012-04-16 07:20:00	23	0	0	0	0
2012-04-16 07:40:00	109.583	2012-04-16 07:40:00	24	0	0	0	0
2012-04-16 08:00:00	109.67	2012-04-16 08:00:00	25	0	0	0	0
2012-04-16 08:20:00	109.512	2012-04-16 08:20:00	26	0	0	0	0
2012-04-16 08:40:00	109.657	2012-04-16 08:40:00	27	0	0	0	0
2012-04-16 09:00:00	109.577	2012-04-16 09:00:00	28	0	0	0	0
2012-04-16 09:20:00	109.568	2012-04-16 09:20:00	29	0	0	0	0
2012-04-16 09:40:00	109.608	2012-04-16 09:40:00	30	0	0	0	0
2012-04-16 10:00:00	109.68	2012-04-16 10:00:00	31	0	0	0	0
2012-04-16 10:20:00	109.974	2012-04-16 10:20:00	32	0	0	0	0
2012-04-16 10:40:00	109.93	2012-04-16 10:40:00	33	0	0	0	0
2012-04-16 11:00:00	109.776	2012-04-16 11:00:00	34	0	0	0	0
2012-04-16 11:20:00	109.706	2012-04-16 11:20:00	35	0	0	0	0
2012-04-16 11:40:00	109.801	2012-04-16 11:40:00	36	0	0	0	0
2012-04-16 12:00:00	109.799	2012-04-16 12:00:00	37	0	0	0	0
2012-04-16 12:20:00	109.892	2012-04-16 12:20:00	38	0	0	0	0
2012-04-16 12:40:00	109.728	2012-04-16 12:40:00	39	0	0	0	0
2012-04-16 13:00:00	109.81	2012-04-16 13:00:00	40	0	0	0	0
2012-04-16 13:20:00	109.358	2012-04-16 13:20:00	41	0	0	0	0
2012-04-16 13:40:00	109.483	2012-04-16 13:40:00	42	0	0	0	0
2012-04-16 14:00:00	109.671	2012-04-16 14:00:00	43	0	0	0	0
2012-04-16 14:20:00	108.091	2012-04-16 14:20:00	44	0	0	0	0
2012-04-16 14:40:00	108.092	2012-04-16 14:40:00	45	0	0	0	0
2012-04-16 15:00:00	108.675	2012-04-16 15:00:00	46	0	0	0	0
2012-04-16 15:20:00	108.073	2012-04-16 15:20:00	47	0	0	0	0
2012-04-16 15:40:00	107.844	2012-04-16 15:40:00	48	0	0	0	0
2012-04-16 16:00:00	108.106	2012-04-16 16:00:00	49	0	0	0	0
2012-04-16 16:20:00	108.349	2012-04-16 16:20:00	50	0	0	0	0
2012-04-16 16:40:00	108.06	2012-04-16 16:40:00	51	0	0	0	0
2012-04-16 17:00:00	107.985	2012-04-16 17:00:00	52	0	0	0	0
2012-04-16 17:20:00	107.888	2012-04-16 17:20:00	53	0	0	0	0
2012-04-16 17:40:00	109.382	2012-04-16 17:40:00	54	0	0	0	0
2012-04-16 18:00:00	107.727	2012-04-16 18:00:00	55	0	0	0	0
2012-04-16 18:20:00	107.583	2012-04-16 18:20:00	56	0	0	0	0
2012-04-16 18:40:00	107.653	2012-04-16 18:40:00	57	0	0	0	0
2012-04-16 19:00:00	107.669	2012-04-16 19:00:00	58	0	0	0	0
2012-04-16 19:20:00	107.585	2012-04-16 19:20:00	59	0	0	0	0
2012-04-16 19:40:00	107.647	2012-04-16 19:40:00	60	0	0	0	0
2012-04-16 20:00:00	107.575	2012-04-16 20:00:00	61	0	0	0	0
2012-04-16 20:20:00	107.454	2012-04-16 20:20:00	62	0	0	0	0
2012-04-16 20:40:00	107.696	2012-04-16 20:40:00	63	0	0	0	0
2012-04-16 21:00:00	107.708	2012-04-16 21:00:00	64	0	0	0	0
2012-04-16 21:20:00	107.758	2012-04-16 21:20:00	65	0	0	0	0
2012-04-16 21:40:00	107.618	2012-04-16 21:40:00	66	0	0	0	0
2012-04-16 22:00:00	107.816	2012-04-16 22:00:00	67	0	0	0	0
2012-04-16 22:20:00	107.737	2012-04-16 22:20:00	68	0	0	0	0
2012-04-16 22:40:00	107.718	2012-04-16 22:40:00	69	0	0	0	0
2012-04-16 23:00:00	107.75	2012-04-16 23:00:00	70	0	0	0	0
2012-04-16 23:20:00	107.628	2012-04-16 23:20:00	71	0	0	0	0
2012-04-16 23:40:00	107.594	2012-04-16 23:40:00	72	0	0	0	0
2012-04-17	107.686	2012-04-17	1	0	0	0	0
2012-04-17 00:20:00	107.708	2012-04-17 00:20:00	2	0	0	0	0
2012-04-17 00:40:00	107.719	2012-04-17 00:40:00	3	0	0	0	0
2012-04-17 01:00:00	107.82	2012-04-17 01:00:00	4	0	0	0	0
2012-04-17 01:20:00	107.75	2012-04-17 01:20:00	5	0	0	0	0
2012-04-17 01:40:00	107.747	2012-04-17 01:40:00	6	0	0	0	0
2012-04-17 02:00:00	107.574	2012-04-17 02:00:00	7	0	0	0	0
2012-04-17 02:20:00	107.567	2012-04-17 02:20:00	8	0	0	0	0
2012-04-17 02:40:00	107.842	2012-04-17 02:40:00	9	0	0	0	0
2012-04-17 03:00:00	107.771	2012-04-17 03:00:00	10	0	0	0	0
2012-04-17 03:20:00	107.749	2012-04-17 03:20:00	11	0	0	0	0
2012-04-17 03:40:00	107.501	2012-04-17 03:40:00	12	0	0	0	0
2012-04-17 04:00:00	107.639	2012-04-17 04:00:00	13	0	0	0	0
2012-04-17 04:20:00	107.795	2012-04-17 04:20:00	14	0	0	0	0
2012-04-17 04:40:00	107.728	2012-04-17 04:40:00	15	0	0	0	0
2012-04-17 05:00:00	107.466	2012-04-17 05:00:00	16	0	0	0	0
2012-04-17 05:20:00	107.816	2012-04-17 05:20:00	17	0	0	0	0
2012-04-17 05:40:00	107.737	2012-04-17 05:40:00	18	0	0	0	0
2012-04-17 06:00:00	107.697	2012-04-17 06:00:00	19	0	0	0	0
2012-04-17 06:20:00	107.74	2012-04-17 06:20:00	20	0	0	0	0
2012-04-17 06:40:00	107.697	2012-04-17 06:40:00	21	0	0	0	0
2012-04-17 07:00:00	107.836	2012-04-17 07:00:00	22	0	0	0	0
2012-04-17 07:20:00	107.83	2012-04-17 07:20:00	23	0	0	0	0
2012-04-17 07:40:00	107.511	2012-04-17 07:40:00	24	0	0	0	0
2012-04-17 08:00:00	107.847	2012-04-17 08:00:00	25	0	0	0	0
2012-04-17 08:20:00	107.945	2012-04-17 08:20:00	26	0	0	0	0
2012-04-17 08:40:00	107.762	2012-04-17 08:40:00	27	0	0	0	0
2012-04-17 09:00:00	107.73	2012-04-17 09:00:00	28	0	0	0	0
2012-04-17 09:20:00	108.973	2012-04-17 09:20:00	29	0	0	0	0
2012-04-17 09:40:00	109.521	2012-04-17 09:40:00	30	0	0	0	0
2012-04-17 10:00:00	108.503	2012-04-17 10:00:00	31	0	0	0	0
2012-04-17 10:20:00	108.505	2012-04-17 10:20:00	32	0	0	0	0
2012-04-17 10:40:00	108.965	2012-04-17 10:40:00	33	0	0	0	0
2012-04-17 11:00:00	108.969	2012-04-17 11:00:00	34	0	0	0	0
2012-04-17 11:20:00	108.85	2012-04-17 11:20:00	35	0	0	0	0
2012-04-17 11:40:00	108.815	2012-04-17 11:40:00	36	0	0	0	0
2012-04-17 12:00:00	108.703	2012-04-17 12:00:00	37	0	0	0	0
2012-04-17 12:20:00	108.798	2012-04-17 12:20:00	38	0	0	0	0
2012-04-17 12:40:00	108.73	2012-04-17 12:40:00	39	0	0	0	0
2012-04-17 13:00:00	108.856	2012-04-17 13:00:00	40	0	0	0	0
2012-04-17 13:20:00	108.937	2012-04-17 13:20:00	41	0	0	0	0
2012-04-17 13:40:00	109.153	2012-04-17 13:40:00	42	0	0	0	0
2012-04-17 14:00:00	110.041	2012-04-17 14:00:00	43	0	0	0	0
2012-04-17 14:20:00	108.797	2012-04-17 14:20:00	44	0	0	0	0
2012-04-17 14:40:00	107.827	2012-04-17 14:40:00	45	0	0	0	0
2012-04-17 15:00:00	107.833	2012-04-17 15:00:00	46	0	0	0	0
2012-04-17 15:20:00	107.767	2012-04-17 15:20:00	47	0	0	0	0
2012-04-17 15:40:00	107.958	2012-04-17 15:40:00	48	0	0	0	0
2012-04-17 16:00:00	108.86	2012-04-17 16:00:00	49	0	0	0	0
2012-04-17 16:20:00	107.765	2012-04-17 16:20:00	50	0	0	0	0
2012-04-17 16:40:00	107.672	2012-04-17 16:40:00	51	0	0	0	0
2012-04-17 17:00:00	107.694	2012-04-17 17:00:00	52	0	0	0	0
2012-04-17 17:20:00	107.832	2012-04-17 17:20:00	53	0	0	0	0
2012-04-17 17:40:00	107.615	2012-04-17 17:40:00	54	0	0	0	0
2012-04-17 18:00:00	107.828	2012-04-17 18:00:00	55	0	0	0	0
2012-04-17 18:20:00	107.747	2012-04-17 18:20:00	56	0	0	0	0
2012-04-17 18:40:00	107.72	2012-04-17 18:40:00	57	0	0	0	0
2012-04-17 19:00:00	107.653	2012-04-17 19:00:00	58	0	0	0	0
2012-04-17 19:20:00	107.673	2012-04-17 19:20:00	59	0	0	0	0
2012-04-17 19:40:00	107.579	2012-04-17 19:40:00	60	0	0	0	0
2012-04-17 20:00:00	107.721	2012-04-17 20:00:00	61	0	0	0	0
2012-04-17 20:20:00	107.638	2012-04-17 20:20:00	62	0	0	0	0
2012-04-17 20:40:00	107.541	2012-04-17 20:40:00	63	0	0	0	0
2012-04-17 21:00:00	107.701	2012-04-17 21:00:00	64	0	0	0	0
2012-04-17 21:20:00	107.555	2012-04-17 21:20:00	65	0	0	0	0
2012-04-17 21:40:00	107.697	2012-04-17 21:40:00	66	0	0	0	0
2012-04-17 22:00:00	107.748	2012-04-17 22:00:00	67	0	0	0	0
2012-04-17 22:20:00	108.137	2012-04-17 22:20:00	68	0	0	0	0
2012-04-17 22:40:00	107.811	2012-04-17 22:40:00	69	0	0	0	0
2012-04-17 23:00:00	107.687	2012-04-17 23:00:00	70	0	0	0	0
2012-04-17 23:20:00	107.863	2012-04-17 23:20:00	71	0	0	0	0
2012-04-17 23:40:00	107.782	2012-04-17 23:40:00	72	0	0	0	0
2012-04-18	107.818	2012-04-18	1	0	0	0	0
2012-04-18 00:20:00	107.761	2012-04-18 00:20:00	2	0	0	0	0
2012-04-18 00:40:00	107.748	2012-04-18 00:40:00	3	0	0	0	0
2012-04-18 01:00:00	107.643	2012-04-18 01:00:00	4	0	0	0	0
2012-04-18 01:20:00	107.845	2012-04-18 01:20:00	5	0	0	0	0
2012-04-18 01:40:00	107.82	2012-04-18 01:40:00	6	0	0	0	0
2012-04-18 02:00:00	107.857	2012-04-18 02:00:00	7	0	0	0	0
2012-04-18 02:20:00	107.738	2012-04-18 02:20:00	8	0	0	0	0
2012-04-18 02:40:00	107.829	2012-04-18 02:40:00	9	0	0	0	0
2012-04-18 03:00:00	107.765	2012-04-18 03:00:00	10	0	0	0	0
2012-04-18 03:20:00	107.789	2012-04-18 03:20:00	11	0	0	0	0
2012-04-18 03:40:00	107.632	2012-04-18 03:40:00	12	0	0	0	0
2012-04-18 04:00:00	107.849	2012-04-18 04:00:00	13	0	0	0	0
2012-04-18 04:20:00	107.979	2012-04-18 04:20:00	14	0	0	0	0
2012-04-18 04:40:00	107.955	2012-04-18 04:40:00	15	0	0	0	0
2012-04-18 05:00:00	107.843	2012-04-18 05:00:00	16	0	0	0	0
2012-04-18 05:20:00	107.721	2012-04-18 05:20:00	17	0	0	0	0
2012-04-18 05:40:00	107.726	2012-04-18 05:40:00	18	0	0	0	0
2012-04-18 06:00:00	107.674	2012-04-18 06:00:00	19	0	0	0	0
2012-04-18 06:20:00	107.851	2012-04-18 06:20:00	20	0	0	0	0
2012-04-18 06:40:00	107.676	2012-04-18 06:40:00	21	0	0	0	0
2012-04-18 07:00:00	107.798	2012-04-18 07:00:00	22	0	0	0	0
2012-04-18 07:20:00	107.372	2012-04-18 07:20:00	23	0	0	0	0
2012-04-18 07:40:00	107.6	2012-04-18 07:40:00	24	0	0	0	0
2012-04-18 08:00:00	109.642	2012-04-18 08:00:00	25	0	0	0	0
2012-04-18 08:20:00	107.549	2012-04-18 08:20:00	26	0	0	0	0
2012-04-18 08:40:00	107.468	2012-04-18 08:40:00	27	0	0	0	0
2012-04-18 09:00:00	107.548	2012-04-18 09:00:00	28	0	0	0	0
2012-04-18 09:20:00	107.6	2012-04-18 09:20:00	29	0	0	0	0
2012-04-18 09:40:00	107.746	2012-04-18 09:40:00	30	0	0	0	0
2012-04-18 10:00:00	107.531	2012-04-18 10:00:00	31	0	0	0	0
2012-04-18 10:20:00	107.553	2012-04-18 10:20:00	32	0	0	0	0
2012-04-18 10:40:00	107.702	2012-04-18 10:40:00	33	0	0	0	0
2012-04-18 11:00:00	107.655	2012-04-18 11:00:00	34	0	0	0	0
2012-04-18 11:20:00	107.494	2012-04-18 11:20:00	35	0	0	0	0
2012-04-18 11:40:00	108.032	2012-04-18 11:40:00	36	0	0	0	0
2012-04-18 12:00:00	107.624	2012-04-18 12:00:00	37	0	0	0	0
2012-04-18 12:20:00	107.622	2012-04-18 12:20:00	38	0	0	0	0
2012-04-18 12:40:00	107.707	2012-04-18 12:40:00	39	0	0	0	0
2012-04-18 13:00:00	107.494	2012-04-18 13:00:00	40	0	0	0	0
2012-04-18 13:20:00	107.534	2012-04-18 13:20:00	41	0	0	0	0
2012-04-18 13:40:00	107.536	2012-04-18 13:40:00	42	0	0	0	0
2012-04-18 14:00:00	107.688	2012-04-18 14:00:00	43	0	0	0	0
2012-04-18 14:20:00	107.725	2012-04-18 14:20:00	44	0	0	0	0
2012-04-18 14:40:00	107.515	2012-04-18 14:40:00	45	0	0	0	0
2012-04-18 15:00:00	107.69	2012-04-18 15:00:00	46	0	0	0	0
2012-04-18 15:20:00	107.52	2012-04-18 15:20:00	47	0	0	0	0
2012-04-18 15:40:00	107.67	2012-04-18 15:40:00	48	0	0	0	0
2012-04-18 16:00:00	107.683	2012-04-18 16:00:00	49	0	0	0	0
2012-04-18 16:20:00	107.882	2012-04-18 16:20:00	50	0	0	0	0
2012-04-18 16:40:00	107.765	2012-04-18 16:40:00	51	0	0	0	0
2012-04-18 17:00:00	107.727	2012-04-18 17:00:00	52	0	0	0	0
2012-04-18 17:20:00	107.653	2012-04-18 17:20:00	53	0	0	0	0
2012-04-18 17:40:00	107.456	2012-04-18 17:40:00	54	0	0	0	0
2012-04-18 18:00:00	107.471	2012-04-18 18:00:00	55	0	0	0	0
2012-04-18 18:20:00	107.716	2012-04-18 18:20:00	56	0	0	0	0
2012-04-18 18:40:00	107.757	2012-04-18 18:40:00	57	0	0	0	0
2012-04-18 19:00:00	107.915	2012-04-18 19:00:00	58	0	0	0	0
2012-04-18 19:20:00	107.916	2012-04-18 19:20:00	59	0	0	0	0
2012-04-18 19:40:00	107.784	2012-04-18 19:40:00	60	0	0	0	0
2012-04-18 20:00:00	107.572	2012-04-18 20:00:00	61	0	0	0	0
2012-04-18 20:20:00	107.734	2012-04-18 20:20:00	62	0	0	0	0
2012-04-18 20:40:00	107.985	2012-04-18 20:40:00	63	0	0	0	0
2012-04-18 21:00:00	107.968	2012-04-18 21:00:00	64	0	0	0	0
2012-04-18 21:20:00	107.961	2012-04-18 21:20:00	65	0	0	0	0
2012-04-18 21:40:00	107.749	2012-04-18 21:40:00	66	0	0	0	0
2012-04-18 22:00:00	107.95	2012-04-18 22:00:00	67	0	0	0	0
2012-04-18 22:20:00	107.779	2012-04-18 22:20:00	68	0	0	0	0
2012-04-18 22:40:00	107.939	2012-04-18 22:40:00	69	0	0	0	0
2012-04-18 23:00:00	107.843	2012-04-18 23:00:00	70	0	0	0	0
2012-04-18 23:20:00	107.653	2012-04-18 23:20:00	71	0	0	0	0
2012-04-18 23:40:00	107.794	2012-04-18 23:40:00	72	0	0	0	0
2012-04-19	107.817	2012-04-19	1	0	0	0	0
2012-04-19 00:20:00	107.931	2012-04-19 00:20:00	2	0	0	0	0
2012-04-19 00:40:00	107.854	2012-04-19 00:40:00	3	0	0	0	0
2012-04-19 01:00:00	107.812	2012-04-19 01:00:00	4	0	0	0	0
2012-04-19 01:20:00	107.78	2012-04-19 01:20:00	5	0	0	0	0
2012-04-19 01:40:00	107.857	2012-04-19 01:40:00	6	0	0	0	0
2012-04-19 02:00:00	107.756	2012-04-19 02:00:00	7	0	0	0	0
2012-04-19 02:20:00	107.877	2012-04-19 02:20:00	8	0	0	0	0
2012-04-19 02:40:00	107.822	2012-04-19 02:40:00	9	0	0	0	0
2012-04-19 03:00:00	107.716	2012-04-19 03:00:00	10	0	0	0	0
2012-04-19 03:20:00	107.587	2012-04-19 03:20:00	11	0	0	0	0
2012-04-19 03:40:00	107.669	2012-04-19 03:40:00	12	0	0	0	0
2012-04-19 04:00:00	107.6	2012-04-19 04:00:00	13	0	0	0	0
2012-04-19 04:20:00	107.718	2012-04-19 04:20:00	14	0	0	0	0
2012-04-19 04:40:00	107.829	2012-04-19 04:40:00	15	0	0	0	0
2012-04-19 05:00:00	107.611	2012-04-19 05:00:00	16	0	0	0	0
2012-04-19 05:20:00	107.706	2012-04-19 05:20:00	17	0	0	0	0
2012-04-19 05:40:00	108	2012-04-19 05:40:00	18	0	0	0	0
2012-04-19 06:00:00	107.75	2012-04-19 06:00:00	19	0	0	0	0
2012-04-19 06:20:00	107.798	2012-04-19 06:20:00	20	0	0	0	0
2012-04-19 06:40:00	107.814	2012-04-19 06:40:00	21	0	0	0	0
2012-04-19 07:00:00	107.805	2012-04-19 07:00:00	22	0	0	0	0
2012-04-19 07:20:00	107.577	2012-04-19 07:20:00	23	0	0	0	0
2012-04-19 07:40:00	107.408	2012-04-19 07:40:00	24	0	0	0	0
2012-04-19 08:00:00	107.528	2012-04-19 08:00:00	25	0	0	0	0
2012-04-19 08:20:00	107.512	2012-04-19 08:20:00	26	0	0	0	0
2012-04-19 08:40:00	107.539	2012-04-19 08:40:00	27	0	0	0	0
2012-04-19 09:00:00	107.452	2012-04-19 09:00:00	28	0	0	0	0
2012-04-19 09:20:00	107.592	2012-04-19 09:20:00	29	0	0	0	0
2012-04-19 09:40:00	107.297	2012-04-19 09:40:00	30	0	0	0	0
2012-04-19 10:00:00	109.496	2012-04-19 10:00:00	31	0	0	0	0
2012-04-19 10:20:00	107.982	2012-04-19 10:20:00	32	0	0	0	0
2012-04-19 10:40:00	107.982	2012-04-19 10:40:00	33	0	0	0	0
2012-04-19 11:00:00	107.721	2012-04-19 11:00:00	34	0	0	0	0
2012-04-19 11:20:00	107.574	2012-04-19 11:20:00	35	0	0	0	0
2012-04-19 11:40:00	107.378	2012-04-19 11:40:00	36	0	0	0	0
2012-04-19 12:00:00	107.358	2012-04-19 12:00:00	37	0	0	0	0
2012-04-19 12:20:00	107.393	2012-04-19 12:20:00	38	0	0	0	0
2012-04-19 12:40:00	107.503	2012-04-19 12:40:00	39	0	0	0	0
2012-04-19 13:00:00	107.409	2012-04-19 13:00:00	40	0	0	0	0
2012-04-19 13:20:00	107.307	2012-04-19 13:20:00	41	0	0	0	0
2012-04-19 13:40:00	107.477	2012-04-19 13:40:00	42	0	0	0	0
2012-04-19 14:00:00	107.401	2012-04-19 14:00:00	43	0	0	0	0
2012-04-19 14:20:00	107.414	2012-04-19 14:20:00	44	0	0	0	0
2012-04-19 14:40:00	107.416	2012-04-19 14:40:00	45	0	0	0	0
2012-04-19 15:00:00	107.49	2012-04-19 15:00:00	46	0	0	0	0
2012-04-19 15:20:00	107.326	2012-04-19 15:20:00	47	0	0	0	0
2012-04-19 15:40:00	107.63	2012-04-19 15:40:00	48	0	0	0	0
2012-04-19 16:00:00	112.826	2012-04-19 16:00:00	49	0	0	0	0
2012-04-19 16:20:00	107.668	2012-04-19 16:20:00	50	0	0	0	0
2012-04-19 16:40:00	107.678	2012-04-19 16:40:00	51	0	0	0	0
2012-04-19 17:00:00	107.34	2012-04-19 17:00:00	52	0	0	0	0
2012-04-19 17:20:00	107.305	2012-04-19 17:20:00	53	0	0	0	0
2012-04-19 17:40:00	107.982	2012-04-19 17:40:00	54	0	0	0	0
2012-04-19 18:00:00	107.21	2012-04-19 18:00:00	55	0	0	0	0
2012-04-19 18:20:00	107.313	2012-04-19 18:20:00	56	0	0	0	0
2012-04-19 18:40:00	107.429	2012-04-19 18:40:00	57	0	0	0	0
2012-04-19 19:00:00	107.081	2012-04-19 19:00:00	58	0	0	0	0
2012-04-19 19:20:00	107.365	2012-04-19 19:20:00	59	0	0	0	0
2012-04-19 19:40:00	109.809	2012-04-19 19:40:00	60	46	14	0	60
2012-04-19 20:00:00	107.361	2012-04-19 20:00:00	61	0	0	0	0
2012-04-19 20:20:00	109.005	2012-04-19 20:20:00	62	35	0	0	35
2012-04-19 20:40:00	107.457	2012-04-19 20:40:00	63	0	0	0	0
2012-04-19 21:00:00	107.345	2012-04-19 21:00:00	64	0	0	0	0
2012-04-19 21:20:00	107.31	2012-04-19 21:20:00	65	0	0	0	0
2012-04-19 21:40:00	107.586	2012-04-19 21:40:00	66	0	0	0	0
2012-04-19 22:00:00	107.778	2012-04-19 22:00:00	67	0	0	0	0
2012-04-19 22:20:00	107.361	2012-04-19 22:20:00	68	0	0	0	0
2012-04-19 22:40:00	107.531	2012-04-19 22:40:00	69	0	0	0	0
2012-04-19 23:00:00	108.48	2012-04-19 23:00:00	70	0	0	0	0
2012-04-19 23:20:00	107.562	2012-04-19 23:20:00	71	0	0	0	0
2012-04-19 23:40:00	109.891	2012-04-19 23:40:00	72	37	4	0	41
2012-04-20	108.745	2012-04-20	1	45	7	0	52
2012-04-20 00:20:00	107.601	2012-04-20 00:20:00	2	0	0	0	0
2012-04-20 00:40:00	107.666	2012-04-20 00:40:00	3	0	0	0	0
2012-04-20 01:00:00	107.582	2012-04-20 01:00:00	4	0	0	0	0
2012-04-20 01:20:00	107.57	2012-04-20 01:20:00	5	0	0	0	0
2012-04-20 01:40:00	107.582	2012-04-20 01:40:00	6	0	0	0	0
2012-04-20 02:00:00	109.637	2012-04-20 02:00:00	7	4	7	0	11
2012-04-20 02:20:00	107.781	2012-04-20 02:20:00	8	0	0	0	0
2012-04-20 02:40:00	107.798	2012-04-20 02:40:00	9	0	0	0	0
2012-04-20 03:00:00	107.691	2012-04-20 03:00:00	10	0	0	0	0
2012-04-20 03:20:00	109.933	2012-04-20 03:20:00	11	11	5	0	16
2012-04-20 03:40:00	107.557	2012-04-20 03:40:00	12	0	0	0	0
2012-04-20 04:00:00	107.639	2012-04-20 04:00:00	13	0	0	0	0
2012-04-20 04:20:00	111.211	2012-04-20 04:20:00	14	16	17	0	33
2012-04-20 04:40:00	107.604	2012-04-20 04:40:00	15	0	0	0	0
2012-04-20 05:00:00	111.571	2012-04-20 05:00:00	16	0	0	0	0
2012-04-20 05:20:00	107.799	2012-04-20 05:20:00	17	0	0	0	0
2012-04-20 05:40:00	107.606	2012-04-20 05:40:00	18	0	0	0	0
2012-04-20 06:00:00	107.564	2012-04-20 06:00:00	19	0	0	0	0
2012-04-20 06:20:00	107.717	2012-04-20 06:20:00	20	0	0	0	0
2012-04-20 06:40:00	107.781	2012-04-20 06:40:00	21	0	0	0	0
2012-04-20 07:00:00	107.624	2012-04-20 07:00:00	22	0	0	0	0
2012-04-20 07:20:00	107.943	2012-04-20 07:20:00	23	0	0	0	0
2012-04-20 07:40:00	107.563	2012-04-20 07:40:00	24	0	0	0	0
2012-04-20 08:00:00	107.594	2012-04-20 08:00:00	25	0	0	0	0
2012-04-20 08:20:00	107.772	2012-04-20 08:20:00	26	0	0	0	0
2012-04-20 08:40:00	107.548	2012-04-20 08:40:00	27	0	0	0	0
2012-04-20 09:00:00	107.828	2012-04-20 09:00:00	28	0	0	0	0
2012-04-20 09:20:00	107.572	2012-04-20 09:20:00	29	0	0	0	0
2012-04-20 09:40:00	107.608	2012-04-20 09:40:00	30	0	0	0	0
2012-04-20 10:00:00	107.752	2012-04-20 10:00:00	31	0	0	0	0
2012-04-20 10:20:00	107.738	2012-04-20 10:20:00	32	0	0	0	0
2012-04-20 10:40:00	108.314	2012-04-20 10:40:00	33	0	0	0	0
2012-04-20 11:00:00	108.299	2012-04-20 11:00:00	34	0	0	0	0
2012-04-20 11:20:00	108.195	2012-04-20 11:20:00	35	0	0	0	0
2012-04-20 11:40:00	107.994	2012-04-20 11:40:00	36	0	0	0	0
2012-04-20 12:00:00	107.939	2012-04-20 12:00:00	37	0	0	0	0
2012-04-20 12:20:00	108.187	2012-04-20 12:20:00	38	0	0	0	0
2012-04-20 12:40:00	108.149	2012-04-20 12:40:00	39	0	0	0	0
2012-04-20 13:00:00	108.326	2012-04-20 13:00:00	40	0	0	0	0
2012-04-20 13:20:00	108.05	2012-04-20 13:20:00	41	0	0	0	0
2012-04-20 13:40:00	107.994	2012-04-20 13:40:00	42	0	0	0	0
2012-04-20 14:00:00	108.097	2012-04-20 14:00:00	43	0	0	0	0
2012-04-20 14:20:00	107.941	2012-04-20 14:20:00	44	0	0	0	0
2012-04-20 14:40:00	107.856	2012-04-20 14:40:00	45	0	0	0	0
2012-04-20 15:00:00	107.803	2012-04-20 15:00:00	46	0	0	0	0
2012-04-20 15:20:00	107.957	2012-04-20 15:20:00	47	0	0	0	0
2012-04-20 15:40:00	108.048	2012-04-20 15:40:00	48	0	0	0	0
2012-04-20 16:00:00	108.13	2012-04-20 16:00:00	49	0	0	0	0
2012-04-20 16:20:00	107.983	2012-04-20 16:20:00	50	0	0	0	0
2012-04-20 16:40:00	107.986	2012-04-20 16:40:00	51	0	0	0	0
2012-04-20 17:00:00	107.938	2012-04-20 17:00:00	52	0	0	0	0
2012-04-20 17:20:00	107.963	2012-04-20 17:20:00	53	0	0	0	0
2012-04-20 17:40:00	107.936	2012-04-20 17:40:00	54	0	0	0	0
2012-04-20 18:00:00	107.498	2012-04-20 18:00:00	55	0	0	0	0
2012-04-20 18:20:00	107.759	2012-04-20 18:20:00	56	0	0	0	0
2012-04-20 18:40:00	107.733	2012-04-20 18:40:00	57	0	0	0	0
2012-04-20 19:00:00	108.81	2012-04-20 19:00:00	58	13	5	0	18
2012-04-20 19:20:00	108.495	2012-04-20 19:20:00	59	9	0	0	9
2012-04-20 19:40:00	109.918	2012-04-20 19:40:00	60	29	6	0	35
2012-04-20 20:00:00	108.556	2012-04-20 20:00:00	61	16	2	0	18
2012-04-20 20:20:00	109.725	2012-04-20 20:20:00	62	45	5	0	50
2012-04-20 20:40:00	114.207	2012-04-20 20:40:00	63	47	10	0	57
2012-04-20 21:00:00	107.744	2012-04-20 21:00:00	64	0	0	0	0
2012-04-20 21:20:00	107.694	2012-04-20 21:20:00	65	0	0	0	0
2012-04-20 21:40:00	108.441	2012-04-20 21:40:00	66	17	0	0	17
2012-04-20 22:00:00	108.264	2012-04-20 22:00:00	67	2	0	0	2
2012-04-20 22:20:00	107.93	2012-04-20 22:20:00	68	0	0	0	0
2012-04-20 22:40:00	107.705	2012-04-20 22:40:00	69	0	0	0	0
2012-04-20 23:00:00	107.804	2012-04-20 23:00:00	70	0	0	0	0
2012-04-20 23:20:00	107.646	2012-04-20 23:20:00	71	0	0	0	0
2012-04-20 23:40:00	107.55	2012-04-20 23:40:00	72	0	0	0	0
2012-04-21	108.245	2012-04-21	1	16	0	0	16
2012-04-21 00:20:00	107.709	2012-04-21 00:20:00	2	0	0	0	0
2012-04-21 00:40:00	108.611	2012-04-21 00:40:00	3	47	0	0	47
2012-04-21 01:00:00	107.723	2012-04-21 01:00:00	4	0	0	0	0
2012-04-21 01:20:00	107.737	2012-04-21 01:20:00	5	0	0	0	0
2012-04-21 01:40:00	107.881	2012-04-21 01:40:00	6	0	0	0	0
2012-04-21 02:00:00	108.089	2012-04-21 02:00:00	7	0	0	0	0
2012-04-21 02:20:00	107.604	2012-04-21 02:20:00	8	0	0	0	0
2012-04-21 02:40:00	107.869	2012-04-21 02:40:00	9	0	0	0	0
2012-04-21 03:00:00	107.658	2012-04-21 03:00:00	10	0	0	0	0
2012-04-21 03:20:00	107.597	2012-04-21 03:20:00	11	0	0	0	0
2012-04-21 03:40:00	107.675	2012-04-21 03:40:00	12	0	0	0	0
2012-04-21 04:00:00	107.732	2012-04-21 04:00:00	13	0	0	0	0
2012-04-21 04:20:00	107.622	2012-04-21 04:20:00	14	0	0	0	0
2012-04-21 04:40:00	107.69	2012-04-21 04:40:00	15	0	0	0	0
2012-04-21 05:00:00	107.814	2012-04-21 05:00:00	16	0	0	0	0
2012-04-21 05:20:00	107.651	2012-04-21 05:20:00	17	0	0	0	0
2012-04-21 05:40:00	107.706	2012-04-21 05:40:00	18	0	0	0	0
2012-04-21 06:00:00	108.543	2012-04-21 06:00:00	19	18	0	0	18
2012-04-21 06:20:00	107.833	2012-04-21 06:20:00	20	0	0	0	0
2012-04-21 06:40:00	107.718	2012-04-21 06:40:00	21	0	0	0	0
2012-04-21 07:00:00	107.823	2012-04-21 07:00:00	22	0	0	0	0
2012-04-21 07:20:00	107.839	2012-04-21 07:20:00	23	0	0	0	0
2012-04-21 07:40:00	107.675	2012-04-21 07:40:00	24	0	0	0	0
2012-04-21 08:00:00	107.737	2012-04-21 08:00:00	25	0	0	0	0
2012-04-21 08:20:00	107.807	2012-04-21 08:20:00	26	0	0	0	0
2012-04-21 08:40:00	107.403	2012-04-21 08:40:00	27	0	0	0	0
2012-04-21 09:00:00	107.484	2012-04-21 09:00:00	28	0	0	0	0
2012-04-21 09:20:00	107.519	2012-04-21 09:20:00	29	0	0	0	0
2012-04-21 09:40:00	107.518	2012-04-21 09:40:00	30	0	0	0	0
2012-04-21 10:00:00	107.634	2012-04-21 10:00:00	31	0	0	0	0
2012-04-21 10:20:00	107.613	2012-04-21 10:20:00	32	0	0	0	0
2012-04-21 10:40:00	107.498	2012-04-21 10:40:00	33	0	0	0	0
2012-04-21 11:00:00	107.602	2012-04-21 11:00:00	34	0	0	0	0
2012-04-21 11:20:00	107.633	2012-04-21 11:20:00	35	0	0	0	0
2012-04-21 11:40:00	107.643	2012-04-21 11:40:00	36	0	0	0	0
2012-04-21 12:00:00	107.61	2012-04-21 12:00:00	37	0	0	0	0
2012-04-21 12:20:00	107.511	2012-04-21 12:20:00	38	0	0	0	0
2012-04-21 12:40:00	107.536	2012-04-21 12:40:00	39	0	0	0	0
2012-04-21 13:00:00	107.49	2012-04-21 13:00:00	40	0	0	0	0
2012-04-21 13:20:00	107.421	2012-04-21 13:20:00	41	0	0	0	0
2012-04-21 13:40:00	107.433	2012-04-21 13:40:00	42	0	0	0	0
2012-04-21 14:00:00	107.349	2012-04-21 14:00:00	43	0	0	0	0
2012-04-21 14:20:00	107.016	2012-04-21 14:20:00	44	0	0	0	0
2012-04-21 14:40:00	107.247	2012-04-21 14:40:00	45	0	0	0	0
2012-04-21 15:00:00	107.14	2012-04-21 15:00:00	46	0	0	0	0
2012-04-21 15:20:00	106.995	2012-04-21 15:20:00	47	0	0	0	0
2012-04-21 15:40:00	119.328	2012-04-21 15:40:00	48	0	0	0	0
2012-04-21 16:00:00	107.111	2012-04-21 16:00:00	49	0	0	0	0
2012-04-21 16:20:00	107.224	2012-04-21 16:20:00	50	0	0	0	0
2012-04-21 16:40:00	107.118	2012-04-21 16:40:00	51	0	0	0	0
2012-04-21 17:00:00	107.118	2012-04-21 17:00:00	52	0	0	0	0
2012-04-21 17:20:00	107.129	2012-04-21 17:20:00	53	0	0	0	0
2012-04-21 17:40:00	107.088	2012-04-21 17:40:00	54	0	0	0	0
2012-04-21 18:00:00	107.366	2012-04-21 18:00:00	55	4	0	0	4
2012-04-21 18:20:00	107.039	2012-04-21 18:20:00	56	0	0	0	0
2012-04-21 18:40:00	116.814	2012-04-21 18:40:00	57	35	20	0	55
2012-04-21 19:00:00	108.256	2012-04-21 19:00:00	58	10	5	0	15
2012-04-21 19:20:00	107.361	2012-04-21 19:20:00	59	0	0	0	0
2012-04-21 19:40:00	107.718	2012-04-21 19:40:00	60	15	1	0	16
2012-04-21 20:00:00	106.988	2012-04-21 20:00:00	61	0	0	0	0
2012-04-21 20:20:00	108.907	2012-04-21 20:20:00	62	34	0	0	34
2012-04-21 20:40:00	109.116	2012-04-21 20:40:00	63	53	2	0	55
2012-04-21 21:00:00	107.388	2012-04-21 21:00:00	64	0	0	0	0
2012-04-21 21:20:00	107.153	2012-04-21 21:20:00	65	0	0	0	0
2012-04-21 21:40:00	107.383	2012-04-21 21:40:00	66	0	0	0	0
2012-04-21 22:00:00	107.472	2012-04-21 22:00:00	67	0	0	0	0
2012-04-21 22:20:00	107.215	2012-04-21 22:20:00	68	0	0	0	0
2012-04-21 22:40:00	107.12	2012-04-21 22:40:00	69	0	0	0	0
2012-04-21 23:00:00	107.221	2012-04-21 23:00:00	70	0	0	0	0
2012-04-21 23:20:00	107.361	2012-04-21 23:20:00	71	0	0	0	0
2012-04-21 23:40:00	107.366	2012-04-21 23:40:00	72	0	0	0	0
2012-04-22	107.082	2012-04-22	1	0	0	0	0
2012-04-22 00:20:00	107.51	2012-04-22 00:20:00	2	0	0	0	0
2012-04-22 00:40:00	107.227	2012-04-22 00:40:00	3	0	0	0	0
2012-04-22 01:00:00	107.493	2012-04-22 01:00:00	4	0	0	0	0
2012-04-22 01:20:00	107.504	2012-04-22 01:20:00	5	0	0	0	0
2012-04-22 01:40:00	107.288	2012-04-22 01:40:00	6	0	0	0	0
2012-04-22 02:00:00	107.437	2012-04-22 02:00:00	7	0	0	0	0
2012-04-22 02:20:00	107.294	2012-04-22 02:20:00	8	0	0	0	0
2012-04-22 02:40:00	107.932	2012-04-22 02:40:00	9	33	0	0	33
2012-04-22 03:00:00	107.252	2012-04-22 03:00:00	10	0	0	0	0
2012-04-22 03:20:00	107.444	2012-04-22 03:20:00	11	0	0	0	0
2012-04-22 03:40:00	107.455	2012-04-22 03:40:00	12	0	0	0	0
2012-04-22 04:00:00	107.501	2012-04-22 04:00:00	13	0	0	0	0
2012-04-22 04:20:00	107.218	2012-04-22 04:20:00	14	0	0	0	0
2012-04-22 04:40:00	107.168	2012-04-22 04:40:00	15	0	0	0	0
2012-04-22 05:00:00	107.338	2012-04-22 05:00:00	16	0	0	0	0
2012-04-22 05:20:00	106.926	2012-04-22 05:20:00	17	0	0	0	0
2012-04-22 05:40:00	107.172	2012-04-22 05:40:00	18	0	0	0	0
2012-04-22 06:00:00	107.16	2012-04-22 06:00:00	19	0	0	0	0
2012-04-22 06:20:00	107.084	2012-04-22 06:20:00	20	0	0	0	0
2012-04-22 06:40:00	107.249	2012-04-22 06:40:00	21	0	0	0	0
2012-04-22 07:00:00	107.102	2012-04-22 07:00:00	22	0	0	0	0
2012-04-22 07:20:00	107.78	2012-04-22 07:20:00	23	0	0	0	0
2012-04-22 07:40:00	110.684	2012-04-22 07:40:00	24	0	0	0	0
2012-04-22 08:00:00	107.169	2012-04-22 08:00:00	25	0	0	0	0
2012-04-22 08:20:00	107.167	2012-04-22 08:20:00	26	0	0	0	0
2012-04-22 08:40:00	107.162	2012-04-22 08:40:00	27	0	0	0	0
2012-04-22 09:00:00	109.979	2012-04-22 09:00:00	28	0	0	0	0
2012-04-22 09:20:00	106.973	2012-04-22 09:20:00	29	0	0	0	0
2012-04-22 09:40:00	107.052	2012-04-22 09:40:00	30	0	0	0	0
2012-04-22 10:00:00	107.02	2012-04-22 10:00:00	31	0	0	0	0
2012-04-22 10:20:00	107.213	2012-04-22 10:20:00	32	0	0	0	0
2012-04-22 10:40:00	107.266	2012-04-22 10:40:00	33	0	0	0	0
2012-04-22 11:00:00	107.112	2012-04-22 11:00:00	34	0	0	0	0
2012-04-22 11:20:00	107.16	2012-04-22 11:20:00	35	0	0	0	0
2012-04-22 11:40:00	107.812	2012-04-22 11:40:00	36	0	0	0	0
2012-04-22 12:00:00	107.038	2012-04-22 12:00:00	37	0	0	0	0
2012-04-22 12:20:00	107.37	2012-04-22 12:20:00	38	0	0	0	0
2012-04-22 12:40:00	107.112	2012-04-22 12:40:00	39	0	0	0	0
2012-04-22 13:00:00	106.957	2012-04-22 13:00:00	40	0	0	0	0
2012-04-22 13:20:00	107.184	2012-04-22 13:20:00	41	0	0	0	0
2012-04-22 13:40:00	106.963	2012-04-22 13:40:00	42	0	0	0	0
2012-04-22 14:00:00	107.089	2012-04-22 14:00:00	43	0	0	0	0
2012-04-22 14:20:00	107.135	2012-04-22 14:20:00	44	0	0	0	0
2012-04-22 14:40:00	107.198	2012-04-22 14:40:00	45	0	0	0	0
2012-04-22 15:00:00	106.994	2012-04-22 15:00:00	46	0	0	0	0
2012-04-22 15:20:00	106.934	2012-04-22 15:20:00	47	0	0	0	0
2012-04-22 15:40:00	106.855	2012-04-22 15:40:00	48	0	0	0	0
2012-04-22 16:00:00	107.241	2012-04-22 16:00:00	49	0	0	0	0
2012-04-22 16:20:00	107.21	2012-04-22 16:20:00	50	0	0	0	0
2012-04-22 16:40:00	107.242	2012-04-22 16:40:00	51	0	0	0	0
2012-04-22 17:00:00	107.346	2012-04-22 17:00:00	52	0	0	0	0
2012-04-22 17:20:00	107.174	2012-04-22 17:20:00	53	0	0	0	0
2012-04-22 17:40:00	107.006	2012-04-22 17:40:00	54	0	0	0	0
2012-04-22 18:00:00	107.071	2012-04-22 18:00:00	55	0	0	0	0
2012-04-22 18:20:00	107.048	2012-04-22 18:20:00	56	0	0	0	0
2012-04-22 18:40:00	108.13	2012-04-22 18:40:00	57	3	2	0	5
2012-04-22 19:00:00	108.362	2012-04-22 19:00:00	58	13	0	0	13
2012-04-22 19:20:00	106.959	2012-04-22 19:20:00	59	0	0	0	0
2012-04-22 19:40:00	108.062	2012-04-22 19:40:00	60	31	0	0	31
2012-04-22 20:00:00	107.171	2012-04-22 20:00:00	61	0	0	0	0
2012-04-22 20:20:00	107.184	2012-04-22 20:20:00	62	0	0	0	0
2012-04-22 20:40:00	107.167	2012-04-22 20:40:00	63	0	0	0	0
2012-04-22 21:00:00	107.13	2012-04-22 21:00:00	64	0	0	0	0
2012-04-22 21:20:00	107.14	2012-04-22 21:20:00	65	0	0	0	0
2012-04-22 21:40:00	107.39	2012-04-22 21:40:00	66	0	0	0	0
2012-04-22 22:00:00	107.198	2012-04-22 22:00:00	67	0	0	0	0
2012-04-22 22:20:00	107.483	2012-04-22 22:20:00	68	0	0	0	0
2012-04-22 22:40:00	107.282	2012-04-22 22:40:00	69	0	0	0	0
2012-04-22 23:00:00	107.247	2012-04-22 23:00:00	70	0	0	0	0
2012-04-22 23:20:00	107.074	2012-04-22 23:20:00	71	0	0	0	0
2012-04-22 23:40:00	107.388	2012-04-22 23:40:00	72	0	0	0	0
2012-04-23	107.231	2012-04-23	1	0	0	0	0
2012-04-23 00:20:00	107.41	2012-04-23 00:20:00	2	0	0	0	0
2012-04-23 00:40:00	107.349	2012-04-23 00:40:00	3	0	0	0	0
2012-04-23 01:00:00	107.71	2012-04-23 01:00:00	4	0	0	0	0
2012-04-23 01:20:00	106.986	2012-04-23 01:20:00	5	0	0	0	0
2012-04-23 01:40:00	107.106	2012-04-23 01:40:00	6	0	0	0	0
2012-04-23 02:00:00	107.263	2012-04-23 02:00:00	7	0	0	0	0
2012-04-23 02:20:00	107.105	2012-04-23 02:20:00	8	0	0	0	0
2012-04-23 02:40:00	106.993	2012-04-23 02:40:00	9	0	0	0	0
2012-04-23 03:00:00	107.153	2012-04-23 03:00:00	10	0	0	0	0
2012-04-23 03:20:00	107.747	2012-04-23 03:20:00	11	0	0	0	0
2012-04-23 03:40:00	107.304	2012-04-23 03:40:00	12	0	0	0	0
2012-04-23 04:00:00	107.2	2012-04-23 04:00:00	13	0	0	0	0
2012-04-23 04:20:00	107.139	2012-04-23 04:20:00	14	0	0	0	0
2012-04-23 04:40:00	107.47	2012-04-23 04:40:00	15	0	0	0	0
2012-04-23 05:00:00	107.296	2012-04-23 05:00:00	16	0	0	0	0
2012-04-23 05:20:00	107.208	2012-04-23 05:20:00	17	0	0	0	0
2012-04-23 05:40:00	107.166	2012-04-23 05:40:00	18	0	0	0	0
2012-04-23 06:00:00	107.386	2012-04-23 06:00:00	19	0	0	0	0
2012-04-23 06:20:00	107.065	2012-04-23 06:20:00	20	0	0	0	0
2012-04-23 06:40:00	107.093	2012-04-23 06:40:00	21	0	0	0	0
2012-04-23 07:00:00	106.816	2012-04-23 07:00:00	22	0	0	0	0
2012-04-23 07:20:00	107.108	2012-04-23 07:20:00	23	0	0	0	0
2012-04-23 07:40:00	107.042	2012-04-23 07:40:00	24	0	0	0	0
2012-04-23 08:00:00	107.05	2012-04-23 08:00:00	25	0	0	0	0
2012-04-23 08:20:00	107.004	2012-04-23 08:20:00	26	0	0	0	0
2012-04-23 08:40:00	107.029	2012-04-23 08:40:00	27	0	0	0	0
2012-04-23 09:00:00	106.992	2012-04-23 09:00:00	28	0	0	0	0
2012-04-23 09:20:00	107.203	2012-04-23 09:20:00	29	0	0	0	0
2012-04-23 09:40:00	107.141	2012-04-23 09:40:00	30	0	0	0	0
2012-04-23 10:00:00	107.161	2012-04-23 10:00:00	31	0	0	0	0
2012-04-23 10:20:00	107.287	2012-04-23 10:20:00	32	0	0	0	0
2012-04-23 10:40:00	107.129	2012-04-23 10:40:00	33	0	0	0	0
2012-04-23 11:00:00	107.402	2012-04-23 11:00:00	34	0	0	0	0
2012-04-23 11:20:00	107.096	2012-04-23 11:20:00	35	0	0	0	0
2012-04-23 11:40:00	107.284	2012-04-23 11:40:00	36	0	0	0	0
2012-04-23 12:00:00	107.252	2012-04-23 12:00:00	37	0	0	0	0
2012-04-23 12:20:00	107.389	2012-04-23 12:20:00	38	0	0	0	0
2012-04-23 12:40:00	106.905	2012-04-23 12:40:00	39	0	0	0	0
2012-04-23 13:00:00	107.006	2012-04-23 13:00:00	40	0	0	0	0
2012-04-23 13:20:00	106.8	2012-04-23 13:20:00	41	0	0	0	0
2012-04-23 13:40:00	106.987	2012-04-23 13:40:00	42	0	0	0	0
2012-04-23 14:00:00	106.983	2012-04-23 14:00:00	43	0	0	0	0
2012-04-23 14:20:00	107.522	2012-04-23 14:20:00	44	0	0	0	0
2012-04-23 14:40:00	115.281	2012-04-23 14:40:00	45	0	0	0	0
2012-04-23 15:00:00	107.141	2012-04-23 15:00:00	46	0	0	0	0
2012-04-23 15:20:00	107.179	2012-04-23 15:20:00	47	8	0	0	8
2012-04-23 15:40:00	106.862	2012-04-23 15:40:00	48	0	0	0	0
2012-04-23 16:00:00	108.137	2012-04-23 16:00:00	49	0	0	0	0
2012-04-23 16:20:00	107.257	2012-04-23 16:20:00	50	0	0	0	0
2012-04-23 16:40:00	107.068	2012-04-23 16:40:00	51	0	0	0	0
2012-04-23 17:00:00	107.308	2012-04-23 17:00:00	52	0	0	0	0
2012-04-23 17:20:00	107.251	2012-04-23 17:20:00	53	0	0	0	0
2012-04-23 17:40:00	107.219	2012-04-23 17:40:00	54	0	0	0	0
2012-04-23 18:00:00	107.13	2012-04-23 18:00:00	55	0	0	0	0
2012-04-23 18:20:00	107.353	2012-04-23 18:20:00	56	0	0	0	0
2012-04-23 18:40:00	107.24	2012-04-23 18:40:00	57	0	0	0	0
2012-04-23 19:00:00	113.535	2012-04-23 19:00:00	58	65	8	1	74
2012-04-23 19:20:00	113.309	2012-04-23 19:20:00	59	67	8	3	78
2012-04-23 19:40:00	107.636	2012-04-23 19:40:00	60	3	0	0	3
2012-04-23 20:00:00	107.215	2012-04-23 20:00:00	61	0	0	0	0
2012-04-23 20:20:00	107.622	2012-04-23 20:20:00	62	0	0	0	0
2012-04-23 20:40:00	107.537	2012-04-23 20:40:00	63	17	0	0	17
2012-04-23 21:00:00	107.499	2012-04-23 21:00:00	64	0	0	0	0
2012-04-23 21:20:00	107.287	2012-04-23 21:20:00	65	0	0	0	0
2012-04-23 21:40:00	107.384	2012-04-23 21:40:00	66	0	0	0	0
2012-04-23 22:00:00	107.313	2012-04-23 22:00:00	67	0	0	0	0
2012-04-23 22:20:00	108.462	2012-04-23 22:20:00	68	39	3	0	42
2012-04-23 22:40:00	111.822	2012-04-23 22:40:00	69	29	5	0	34
2012-04-23 23:00:00	107.493	2012-04-23 23:00:00	70	0	0	0	0
2012-04-23 23:20:00	107.496	2012-04-23 23:20:00	71	0	0	0	0
2012-04-23 23:40:00	107.602	2012-04-23 23:40:00	72	0	0	0	0
2012-04-24	108.142	2012-04-24	1	0	0	0	0
2012-04-24 00:20:00	107.446	2012-04-24 00:20:00	2	0	0	0	0
2012-04-24 00:40:00	107.638	2012-04-24 00:40:00	3	0	0	0	0
2012-04-24 01:00:00	107.595	2012-04-24 01:00:00	4	0	0	0	0
2012-04-24 01:20:00	107.691	2012-04-24 01:20:00	5	0	0	0	0
2012-04-24 01:40:00	107.896	2012-04-24 01:40:00	6	0	0	0	0
2012-04-24 02:00:00	107.723	2012-04-24 02:00:00	7	0	0	0	0
2012-04-24 02:20:00	108.515	2012-04-24 02:20:00	8	0	0	0	0
2012-04-24 02:40:00	107.749	2012-04-24 02:40:00	9	0	0	0	0
2012-04-24 03:00:00	107.6	2012-04-24 03:00:00	10	0	0	0	0
2012-04-24 03:20:00	107.739	2012-04-24 03:20:00	11	0	0	0	0
2012-04-24 03:40:00	107.702	2012-04-24 03:40:00	12	0	0	0	0
2012-04-24 04:00:00	107.891	2012-04-24 04:00:00	13	0	0	0	0
2012-04-24 04:20:00	107.689	2012-04-24 04:20:00	14	0	0	0	0
2012-04-24 04:40:00	107.693	2012-04-24 04:40:00	15	0	0	0	0
2012-04-24 05:00:00	107.696	2012-04-24 05:00:00	16	0	0	0	0
2012-04-24 05:20:00	107.66	2012-04-24 05:20:00	17	0	0	0	0
2012-04-24 05:40:00	107.766	2012-04-24 05:40:00	18	0	0	0	0
2012-04-24 06:00:00	107.701	2012-04-24 06:00:00	19	0	0	0	0
2012-04-24 06:20:00	107.639	2012-04-24 06:20:00	20	0	0	0	0
2012-04-24 06:40:00	107.724	2012-04-24 06:40:00	21	0	0	0	0
2012-04-24 07:00:00	107.68	2012-04-24 07:00:00	22	0	0	0	0
2012-04-24 07:20:00	107.739	2012-04-24 07:20:00	23	0	0	0	0
2012-04-24 07:40:00	107.749	2012-04-24 07:40:00	24	0	0	0	0
2012-04-24 08:00:00	107.727	2012-04-24 08:00:00	25	0	0	0	0
2012-04-24 08:20:00	107.733	2012-04-24 08:20:00	26	0	0	0	0
2012-04-24 08:40:00	107.747	2012-04-24 08:40:00	27	0	0	0	0
2012-04-24 09:00:00	107.774	2012-04-24 09:00:00	28	0	0	0	0
2012-04-24 09:20:00	107.709	2012-04-24 09:20:00	29	0	0	0	0
2012-04-24 09:40:00	107.546	2012-04-24 09:40:00	30	0	0	0	0
2012-04-24 10:00:00	107.888	2012-04-24 10:00:00	31	0	0	0	0
2012-04-24 10:20:00	108.283	2012-04-24 10:20:00	32	0	0	0	0
2012-04-24 10:40:00	111.165	2012-04-24 10:40:00	33	0	0	0	0
2012-04-24 11:00:00	110.53	2012-04-24 11:00:00	34	0	0	0	0
2012-04-24 11:20:00	108.542	2012-04-24 11:20:00	35	0	0	0	0
2012-04-24 11:40:00	107.617	2012-04-24 11:40:00	36	0	0	0	0
2012-04-24 12:00:00	107.539	2012-04-24 12:00:00	37	0	0	0	0
2012-04-24 12:20:00	107.57	2012-04-24 12:20:00	38	0	0	0	0
2012-04-24 12:40:00	107.577	2012-04-24 12:40:00	39	0	0	0	0
2012-04-24 13:00:00	107.652	2012-04-24 13:00:00	40	0	0	0	0
2012-04-24 13:20:00	107.835	2012-04-24 13:20:00	41	0	0	0	0
2012-04-24 13:40:00	107.557	2012-04-24 13:40:00	42	0	0	0	0
2012-04-24 14:00:00	107.642	2012-04-24 14:00:00	43	0	0	0	0
2012-04-24 14:20:00	107.803	2012-04-24 14:20:00	44	0	0	0	0
2012-04-24 14:40:00	107.64	2012-04-24 14:40:00	45	0	0	0	0
2012-04-24 15:00:00	111.136	2012-04-24 15:00:00	46	0	0	0	0
2012-04-24 15:20:00	107.628	2012-04-24 15:20:00	47	0	0	0	0
2012-04-24 15:40:00	108.153	2012-04-24 15:40:00	48	0	0	0	0
2012-04-24 16:00:00	108.038	2012-04-24 16:00:00	49	0	0	0	0
2012-04-24 16:20:00	107.871	2012-04-24 16:20:00	50	0	0	0	0
2012-04-24 16:40:00	107.813	2012-04-24 16:40:00	51	0	0	0	0
2012-04-24 17:00:00	107.834	2012-04-24 17:00:00	52	0	0	0	0
2012-04-24 17:20:00	107.819	2012-04-24 17:20:00	53	0	0	0	0
2012-04-24 17:40:00	107.925	2012-04-24 17:40:00	54	0	0	0	0
2012-04-24 18:00:00	107.779	2012-04-24 18:00:00	55	0	0	0	0
2012-04-24 18:20:00	107.821	2012-04-24 18:20:00	56	0	0	0	0
2012-04-24 18:40:00	107.875	2012-04-24 18:40:00	57	0	0	0	0
2012-04-24 19:00:00	107.693	2012-04-24 19:00:00	58	0	0	0	0
2012-04-24 19:20:00	108.381	2012-04-24 19:20:00	59	0	0	0	0
2012-04-24 19:40:00	107.689	2012-04-24 19:40:00	60	0	0	0	0
2012-04-24 20:00:00	108.754	2012-04-24 20:00:00	61	0	0	0	0
2012-04-24 20:20:00	107.661	2012-04-24 20:20:00	62	0	0	0	0
2012-04-24 20:40:00	107.608	2012-04-24 20:40:00	63	0	0	0	0
2012-04-24 21:00:00	107.68	2012-04-24 21:00:00	64	0	0	0	0
2012-04-24 21:20:00	107.875	2012-04-24 21:20:00	65	0	0	0	0
2012-04-24 21:40:00	107.662	2012-04-24 21:40:00	66	0	0	0	0
2012-04-24 22:00:00	108.012	2012-04-24 22:00:00	67	0	0	0	0
2012-04-24 22:20:00	107.606	2012-04-24 22:20:00	68	0	0	0	0
2012-04-24 22:40:00	107.698	2012-04-24 22:40:00	69	0	0	0	0
2012-04-24 23:00:00	107.719	2012-04-24 23:00:00	70	0	0	0	0
2012-04-24 23:20:00	107.78	2012-04-24 23:20:00	71	0	0	0	0
2012-04-24 23:40:00	107.765	2012-04-24 23:40:00	72	0	0	0	0
2012-04-25	107.79	2012-04-25	1	0	0	0	0
2012-04-25 00:20:00	107.778	2012-04-25 00:20:00	2	0	0	0	0
2012-04-25 00:40:00	107.784	2012-04-25 00:40:00	3	0	0	0	0
2012-04-25 01:00:00	107.898	2012-04-25 01:00:00	4	0	0	0	0
2012-04-25 01:20:00	107.74	2012-04-25 01:20:00	5	0	0	0	0
2012-04-25 01:40:00	107.7	2012-04-25 01:40:00	6	0	0	0	0
2012-04-25 02:00:00	107.714	2012-04-25 02:00:00	7	0	0	0	0
2012-04-25 02:20:00	107.703	2012-04-25 02:20:00	8	0	0	0	0
2012-04-25 02:40:00	107.901	2012-04-25 02:40:00	9	0	0	0	0
2012-04-25 03:00:00	107.953	2012-04-25 03:00:00	10	0	0	0	0
2012-04-25 03:20:00	107.937	2012-04-25 03:20:00	11	0	0	0	0
2012-04-25 03:40:00	107.846	2012-04-25 03:40:00	12	0	0	0	0
2012-04-25 04:00:00	107.746	2012-04-25 04:00:00	13	0	0	0	0
2012-04-25 04:20:00	107.901	2012-04-25 04:20:00	14	0	0	0	0
2012-04-25 04:40:00	107.697	2012-04-25 04:40:00	15	0	0	0	0
2012-04-25 05:00:00	107.94	2012-04-25 05:00:00	16	0	0	0	0
2012-04-25 05:20:00	107.728	2012-04-25 05:20:00	17	0	0	0	0
2012-04-25 05:40:00	107.781	2012-04-25 05:40:00	18	0	0	0	0
2012-04-25 06:00:00	108.291	2012-04-25 06:00:00	19	0	0	0	0
2012-04-25 06:20:00	108.401	2012-04-25 06:20:00	20	0	0	0	0
2012-04-25 06:40:00	107.989	2012-04-25 06:40:00	21	0	0	0	0
2012-04-25 07:00:00	115.875	2012-04-25 07:00:00	22	0	0	0	0
2012-04-25 07:20:00	107.897	2012-04-25 07:20:00	23	0	0	0	0
2012-04-25 07:40:00	107.855	2012-04-25 07:40:00	24	0	0	0	0
2012-04-25 08:00:00	107.869	2012-04-25 08:00:00	25	0	0	0	0
2012-04-25 08:20:00	107.98	2012-04-25 08:20:00	26	0	0	0	0
2012-04-25 08:40:00	107.86	2012-04-25 08:40:00	27	0	0	0	0
2012-04-25 09:00:00	107.884	2012-04-25 09:00:00	28	0	0	0	0
2012-04-25 09:20:00	107.842	2012-04-25 09:20:00	29	0	0	0	0
2012-04-25 09:40:00	113.347	2012-04-25 09:40:00	30	0	0	0	0
2012-04-25 10:00:00	107.969	2012-04-25 10:00:00	31	0	0	0	0
2012-04-25 10:20:00	107.908	2012-04-25 10:20:00	32	0	0	0	0
2012-04-25 10:40:00	107.973	2012-04-25 10:40:00	33	0	0	0	0
2012-04-25 11:00:00	108.697	2012-04-25 11:00:00	34	0	0	0	0
2012-04-25 11:20:00	108.138	2012-04-25 11:20:00	35	0	0	0	0
2012-04-25 11:40:00	108.109	2012-04-25 11:40:00	36	0	0	0	0
2012-04-25 12:00:00	108.182	2012-04-25 12:00:00	37	0	0	0	0
2012-04-25 12:20:00	108.199	2012-04-25 12:20:00	38	0	0	0	0
2012-04-25 12:40:00	108.191	2012-04-25 12:40:00	39	0	0	0	0
2012-04-25 13:00:00	108.089	2012-04-25 13:00:00	40	0	0	0	0
2012-04-25 13:20:00	108.119	2012-04-25 13:20:00	41	0	0	0	0
2012-04-25 13:40:00	108.299	2012-04-25 13:40:00	42	0	0	0	0
2012-04-25 14:00:00	108.041	2012-04-25 14:00:00	43	0	0	0	0
2012-04-25 14:20:00	108.068	2012-04-25 14:20:00	44	0	0	0	0
2012-04-25 14:40:00	109.666	2012-04-25 14:40:00	45	0	0	0	0
2012-04-25 15:00:00	115.168	2012-04-25 15:00:00	46	0	0	0	0
2012-04-25 15:20:00	108.139	2012-04-25 15:20:00	47	0	0	0	0
2012-04-25 15:40:00	108.265	2012-04-25 15:40:00	48	0	0	0	0
2012-04-25 16:00:00	112.345	2012-04-25 16:00:00	49	0	0	0	0
2012-04-25 16:20:00	108.244	2012-04-25 16:20:00	50	0	0	0	0
2012-04-25 16:40:00	108.306	2012-04-25 16:40:00	51	0	0	0	0
2012-04-25 17:00:00	108.141	2012-04-25 17:00:00	52	0	0	0	0
2012-04-25 17:20:00	115.298	2012-04-25 17:20:00	53	0	0	0	0
2012-04-25 17:40:00	108.054	2012-04-25 17:40:00	54	0	0	0	0
2012-04-25 18:00:00	107.976	2012-04-25 18:00:00	55	0	0	0	0
2012-04-25 18:20:00	115.634	2012-04-25 18:20:00	56	0	0	0	0
2012-04-25 18:40:00	108.063	2012-04-25 18:40:00	57	0	0	0	0
2012-04-25 19:00:00	108.723	2012-04-25 19:00:00	58	13	2	0	15
2012-04-25 19:20:00	108.081	2012-04-25 19:20:00	59	0	0	0	0
2012-04-25 19:40:00	107.89	2012-04-25 19:40:00	60	0	0	0	0
2012-04-25 20:00:00	107.771	2012-04-25 20:00:00	61	0	0	0	0
2012-04-25 20:20:00	107.878	2012-04-25 20:20:00	62	0	0	0	0
2012-04-25 20:40:00	107.851	2012-04-25 20:40:00	63	0	0	0	0
2012-04-25 21:00:00	107.751	2012-04-25 21:00:00	64	0	0	0	0
2012-04-25 21:20:00	107.786	2012-04-25 21:20:00	65	0	0	0	0
2012-04-25 21:40:00	107.927	2012-04-25 21:40:00	66	0	0	0	0
2012-04-25 22:00:00	107.535	2012-04-25 22:00:00	67	0	0	0	0
2012-04-25 22:20:00	107.718	2012-04-25 22:20:00	68	0	0	0	0
2012-04-25 22:40:00	107.674	2012-04-25 22:40:00	69	0	0	0	0
2012-04-25 23:00:00	107.443	2012-04-25 23:00:00	70	0	0	0	0
2012-04-25 23:20:00	107.631	2012-04-25 23:20:00	71	0	0	0	0
2012-04-25 23:40:00	107.563	2012-04-25 23:40:00	72	0	0	0	0
2012-04-26	107.812	2012-04-26	1	0	0	0	0
2012-04-26 00:20:00	107.608	2012-04-26 00:20:00	2	0	0	0	0
2012-04-26 00:40:00	107.568	2012-04-26 00:40:00	3	0	0	0	0
2012-04-26 01:00:00	107.768	2012-04-26 01:00:00	4	0	0	0	0
2012-04-26 01:20:00	107.48	2012-04-26 01:20:00	5	0	0	0	0
2012-04-26 01:40:00	107.467	2012-04-26 01:40:00	6	0	0	0	0
2012-04-26 02:00:00	107.29	2012-04-26 02:00:00	7	0	0	0	0
2012-04-26 02:20:00	107.68	2012-04-26 02:20:00	8	0	0	0	0
2012-04-26 02:40:00	107.44	2012-04-26 02:40:00	9	0	0	0	0
2012-04-26 03:00:00	107.396	2012-04-26 03:00:00	10	0	0	0	0
2012-04-26 03:20:00	107.394	2012-04-26 03:20:00	11	0	0	0	0
2012-04-26 03:40:00	107.258	2012-04-26 03:40:00	12	0	0	0	0
2012-04-26 04:00:00	107.716	2012-04-26 04:00:00	13	0	0	0	0
2012-04-26 04:20:00	107.105	2012-04-26 04:20:00	14	0	0	0	0
2012-04-26 04:40:00	107.383	2012-04-26 04:40:00	15	0	0	0	0
2012-04-26 05:00:00	107.333	2012-04-26 05:00:00	16	0	0	0	0
2012-04-26 05:20:00	107.78	2012-04-26 05:20:00	17	0	0	0	0
2012-04-26 05:40:00	107.255	2012-04-26 05:40:00	18	0	0	0	0
2012-04-26 06:00:00	107.455	2012-04-26 06:00:00	19	0	0	0	0
2012-04-26 06:20:00	107.19	2012-04-26 06:20:00	20	0	0	0	0
2012-04-26 06:40:00	107.612	2012-04-26 06:40:00	21	0	0	0	0
2012-04-26 07:00:00	107.305	2012-04-26 07:00:00	22	0	0	0	0
2012-04-26 07:20:00	106.576	2012-04-26 07:20:00	23	0	0	0	0
2012-04-26 07:40:00	113.246	2012-04-26 07:40:00	24	0	0	0	0
2012-04-26 08:00:00	106.878	2012-04-26 08:00:00	25	0	0	0	0
2012-04-26 08:20:00	106.874	2012-04-26 08:20:00	26	0	0	0	0
2012-04-26 08:40:00	108.915	2012-04-26 08:40:00	27	0	0	0	0
2012-04-26 09:00:00	106.936	2012-04-26 09:00:00	28	0	0	0	0
2012-04-26 09:20:00	107.876	2012-04-26 09:20:00	29	0	0	0	0
2012-04-26 09:40:00	108.146	2012-04-26 09:40:00	30	0	0	0	0
2012-04-26 10:00:00	109.928	2012-04-26 10:00:00	31	0	0	0	0
2012-04-26 10:20:00	117.563	2012-04-26 10:20:00	32	0	0	0	0
2012-04-26 10:40:00	107.621	2012-04-26 10:40:00	33	0	0	0	0
2012-04-26 11:00:00	107.713	2012-04-26 11:00:00	34	0	0	0	0
2012-04-26 11:20:00	107.296	2012-04-26 11:20:00	35	0	0	0	0
2012-04-26 11:40:00	107.127	2012-04-26 11:40:00	36	0	0	0	0
2012-04-26 12:00:00	107.269	2012-04-26 12:00:00	37	0	0	0	0
2012-04-26 12:20:00	106.956	2012-04-26 12:20:00	38	0	0	0	0
2012-04-26 12:40:00	107.01	2012-04-26 12:40:00	39	0	0	0	0
2012-04-26 13:00:00	115.226	2012-04-26 13:00:00	40	0	0	0	0
2012-04-26 13:20:00	107.228	2012-04-26 13:20:00	41	0	0	0	0
2012-04-26 13:40:00	114.762	2012-04-26 13:40:00	42	0	0	0	0
2012-04-26 14:00:00	107.349	2012-04-26 14:00:00	43	0	0	0	0
2012-04-26 14:20:00	118.415	2012-04-26 14:20:00	44	0	0	0	0
2012-04-26 14:40:00	106.957	2012-04-26 14:40:00	45	0	0	0	0
2012-04-26 15:00:00	107.12	2012-04-26 15:00:00	46	0	0	0	0
2012-04-26 15:20:00	106.996	2012-04-26 15:20:00	47	0	0	0	0
2012-04-26 15:40:00	107.024	2012-04-26 15:40:00	48	0	0	0	0
2012-04-26 16:00:00	117.169	2012-04-26 16:00:00	49	0	0	0	0
2012-04-26 16:20:00	106.885	2012-04-26 16:20:00	50	0	0	0	0
2012-04-26 16:40:00	107.02	2012-04-26 16:40:00	51	0	0	0	0
2012-04-26 17:00:00	107.004	2012-04-26 17:00:00	52	0	0	0	0
2012-04-26 17:20:00	107.071	2012-04-26 17:20:00	53	0	0	0	0
2012-04-26 17:40:00	107.021	2012-04-26 17:40:00	54	0	0	0	0
2012-04-26 18:00:00	106.936	2012-04-26 18:00:00	55	0	0	0	0
2012-04-26 18:20:00	106.875	2012-04-26 18:20:00	56	0	0	0	0
2012-04-26 18:40:00	107.287	2012-04-26 18:40:00	57	0	0	0	0
2012-04-26 19:00:00	108.418	2012-04-26 19:00:00	58	21	5	0	26
2012-04-26 19:20:00	106.972	2012-04-26 19:20:00	59	0	0	0	0
2012-04-26 19:40:00	107.525	2012-04-26 19:40:00	60	0	0	0	0
2012-04-26 20:00:00	106.994	2012-04-26 20:00:00	61	0	0	0	0
2012-04-26 20:20:00	106.995	2012-04-26 20:20:00	62	0	0	0	0
2012-04-26 20:40:00	106.977	2012-04-26 20:40:00	63	0	0	0	0
2012-04-26 21:00:00	106.96	2012-04-26 21:00:00	64	0	0	0	0
2012-04-26 21:20:00	106.747	2012-04-26 21:20:00	65	0	0	0	0
2012-04-26 21:40:00	106.851	2012-04-26 21:40:00	66	0	0	0	0
2012-04-26 22:00:00	106.857	2012-04-26 22:00:00	67	0	0	0	0
2012-04-26 22:20:00	106.969	2012-04-26 22:20:00	68	0	0	0	0
2012-04-26 22:40:00	107.532	2012-04-26 22:40:00	69	0	0	0	0
2012-04-26 23:00:00	106.802	2012-04-26 23:00:00	70	0	0	0	0
2012-04-26 23:20:00	106.834	2012-04-26 23:20:00	71	0	0	0	0
2012-04-26 23:40:00	106.806	2012-04-26 23:40:00	72	0	0	0	0
2012-04-27	107.083	2012-04-27	1	0	0	0	0
2012-04-27 00:20:00	106.905	2012-04-27 00:20:00	2	0	0	0	0
2012-04-27 00:40:00	106.955	2012-04-27 00:40:00	3	0	0	0	0
2012-04-27 01:00:00	107.34	2012-04-27 01:00:00	4	0	0	0	0
2012-04-27 01:20:00	106.849	2012-04-27 01:20:00	5	0	0	0	0
2012-04-27 01:40:00	106.871	2012-04-27 01:40:00	6	0	0	0	0
2012-04-27 02:00:00	107.048	2012-04-27 02:00:00	7	0	0	0	0
2012-04-27 02:20:00	107.036	2012-04-27 02:20:00	8	0	0	0	0
2012-04-27 02:40:00	106.749	2012-04-27 02:40:00	9	0	0	0	0
2012-04-27 03:00:00	107.031	2012-04-27 03:00:00	10	0	0	0	0
2012-04-27 03:20:00	107.061	2012-04-27 03:20:00	11	0	0	0	0
2012-04-27 03:40:00	106.992	2012-04-27 03:40:00	12	0	0	0	0
2012-04-27 04:00:00	107.055	2012-04-27 04:00:00	13	0	0	0	0
2012-04-27 04:20:00	106.982	2012-04-27 04:20:00	14	0	0	0	0
2012-04-27 04:40:00	107.047	2012-04-27 04:40:00	15	0	0	0	0
2012-04-27 05:00:00	107.176	2012-04-27 05:00:00	16	0	0	0	0
2012-04-27 05:20:00	107.164	2012-04-27 05:20:00	17	0	0	0	0
2012-04-27 05:40:00	107.151	2012-04-27 05:40:00	18	0	0	0	0
2012-04-27 06:00:00	107.379	2012-04-27 06:00:00	19	0	0	0	0
2012-04-27 06:20:00	107.187	2012-04-27 06:20:00	20	0	0	0	0
2012-04-27 06:40:00	107.307	2012-04-27 06:40:00	21	0	0	0	0
2012-04-27 07:00:00	110.693	2012-04-27 07:00:00	22	0	0	0	0
2012-04-27 07:20:00	107.084	2012-04-27 07:20:00	23	0	0	0	0
2012-04-27 07:40:00	108.924	2012-04-27 07:40:00	24	0	0	0	0
2012-04-27 08:00:00	107.09	2012-04-27 08:00:00	25	0	0	0	0
2012-04-27 08:20:00	107.013	2012-04-27 08:20:00	26	0	0	0	0
2012-04-27 08:40:00	106.925	2012-04-27 08:40:00	27	0	0	0	0
2012-04-27 09:00:00	106.988	2012-04-27 09:00:00	28	0	0	0	0
2012-04-27 09:20:00	114.287	2012-04-27 09:20:00	29	0	0	0	0
2012-04-27 09:40:00	107.1	2012-04-27 09:40:00	30	0	0	0	0
2012-04-27 10:00:00	107.315	2012-04-27 10:00:00	31	0	0	0	0
2012-04-27 10:20:00	107.181	2012-04-27 10:20:00	32	0	0	0	0
2012-04-27 10:40:00	107.081	2012-04-27 10:40:00	33	0	0	0	0
2012-04-27 11:00:00	106.833	2012-04-27 11:00:00	34	0	0	0	0
2012-04-27 11:20:00	107.035	2012-04-27 11:20:00	35	0	0	0	0
2012-04-27 11:40:00	107.02	2012-04-27 11:40:00	36	0	0	0	0
2012-04-27 12:00:00	107.16	2012-04-27 12:00:00	37	0	0	0	0
2012-04-27 12:20:00	107.111	2012-04-27 12:20:00	38	0	0	0	0
2012-04-27 12:40:00	107.033	2012-04-27 12:40:00	39	0	0	0	0
2012-04-27 13:00:00	107.042	2012-04-27 13:00:00	40	0	0	0	0
2012-04-27 13:20:00	107.134	2012-04-27 13:20:00	41	0	0	0	0
2012-04-27 13:40:00	107.026	2012-04-27 13:40:00	42	0	0	0	0
2012-04-27 14:00:00	107.12	2012-04-27 14:00:00	43	0	0	0	0
2012-04-27 14:20:00	107.01	2012-04-27 14:20:00	44	0	0	0	0
2012-04-27 14:40:00	106.908	2012-04-27 14:40:00	45	0	0	0	0
2012-04-27 15:00:00	111.795	2012-04-27 15:00:00	46	0	0	0	0
2012-04-27 15:20:00	106.81	2012-04-27 15:20:00	47	0	0	0	0
2012-04-27 15:40:00	106.964	2012-04-27 15:40:00	48	0	0	0	0
2012-04-27 16:00:00	106.652	2012-04-27 16:00:00	49	0	0	0	0
2012-04-27 16:20:00	106.62	2012-04-27 16:20:00	50	0	0	0	0
2012-04-27 16:40:00	106.705	2012-04-27 16:40:00	51	0	0	0	0
2012-04-27 17:00:00	106.705	2012-04-27 17:00:00	52	0	0	0	0
2012-04-27 17:20:00	106.549	2012-04-27 17:20:00	53	0	0	0	0
2012-04-27 17:40:00	106.742	2012-04-27 17:40:00	54	0	0	0	0
2012-04-27 18:00:00	106.57	2012-04-27 18:00:00	55	0	0	0	0
2012-04-27 18:20:00	106.635	2012-04-27 18:20:00	56	0	0	0	0
2012-04-27 18:40:00	106.633	2012-04-27 18:40:00	57	0	0	0	0
2012-04-27 19:00:00	106.638	2012-04-27 19:00:00	58	0	0	0	0
2012-04-27 19:20:00	106.948	2012-04-27 19:20:00	59	0	0	0	0
2012-04-27 19:40:00	106.578	2012-04-27 19:40:00	60	0	0	0	0
2012-04-27 20:00:00	106.521	2012-04-27 20:00:00	61	0	0	0	0
2012-04-27 20:20:00	106.69	2012-04-27 20:20:00	62	0	0	0	0
2012-04-27 20:40:00	106.647	2012-04-27 20:40:00	63	0	0	0	0
2012-04-27 21:00:00	106.712	2012-04-27 21:00:00	64	0	0	0	0
2012-04-27 21:20:00	106.63	2012-04-27 21:20:00	65	0	0	0	0
2012-04-27 21:40:00	106.532	2012-04-27 21:40:00	66	0	0	0	0
2012-04-27 22:00:00	106.601	2012-04-27 22:00:00	67	0	0	0	0
2012-04-27 22:20:00	106.618	2012-04-27 22:20:00	68	0	0	0	0
2012-04-27 22:40:00	106.692	2012-04-27 22:40:00	69	0	0	0	0
2012-04-27 23:00:00	106.552	2012-04-27 23:00:00	70	0	0	0	0
2012-04-27 23:20:00	106.454	2012-04-27 23:20:00	71	0	0	0	0
2012-04-27 23:40:00	106.814	2012-04-27 23:40:00	72	0	0	0	0
2012-04-28	106.701	2012-04-28	1	0	0	0	0
2012-04-28 00:20:00	106.703	2012-04-28 00:20:00	2	0	0	0	0
2012-04-28 00:40:00	106.553	2012-04-28 00:40:00	3	0	0	0	0
2012-04-28 01:00:00	106.679	2012-04-28 01:00:00	4	0	0	0	0
2012-04-28 01:20:00	106.639	2012-04-28 01:20:00	5	0	0	0	0
2012-04-28 01:40:00	106.562	2012-04-28 01:40:00	6	0	0	0	0
2012-04-28 02:00:00	106.345	2012-04-28 02:00:00	7	0	0	0	0
2012-04-28 02:20:00	106.651	2012-04-28 02:20:00	8	0	0	0	0
2012-04-28 02:40:00	106.662	2012-04-28 02:40:00	9	0	0	0	0
2012-04-28 03:00:00	106.539	2012-04-28 03:00:00	10	0	0	0	0
2012-04-28 03:20:00	106.912	2012-04-28 03:20:00	11	0	0	0	0
2012-04-28 03:40:00	106.487	2012-04-28 03:40:00	12	0	0	0	0
2012-04-28 04:00:00	106.621	2012-04-28 04:00:00	13	0	0	0	0
2012-04-28 04:20:00	106.481	2012-04-28 04:20:00	14	0	0	0	0
2012-04-28 04:40:00	106.49	2012-04-28 04:40:00	15	0	0	0	0
2012-04-28 05:00:00	106.422	2012-04-28 05:00:00	16	0	0	0	0
2012-04-28 05:20:00	106.332	2012-04-28 05:20:00	17	0	0	0	0
2012-04-28 05:40:00	106.562	2012-04-28 05:40:00	18	0	0	0	0
2012-04-28 06:00:00	106.582	2012-04-28 06:00:00	19	0	0	0	0
2012-04-28 06:20:00	106.435	2012-04-28 06:20:00	20	0	0	0	0
2012-04-28 06:40:00	106.692	2012-04-28 06:40:00	21	0	0	0	0
2012-04-28 07:00:00	111.636	2012-04-28 07:00:00	22	0	0	0	0
2012-04-28 07:20:00	107.226	2012-04-28 07:20:00	23	0	0	0	0
2012-04-28 07:40:00	106.265	2012-04-28 07:40:00	24	0	0	0	0
2012-04-28 08:00:00	106.338	2012-04-28 08:00:00	25	0	0	0	0
2012-04-28 08:20:00	106.183	2012-04-28 08:20:00	26	0	0	0	0
2012-04-28 08:40:00	106.422	2012-04-28 08:40:00	27	0	0	0	0
2012-04-28 09:00:00	106.408	2012-04-28 09:00:00	28	0	0	0	0
2012-04-28 09:20:00	106.294	2012-04-28 09:20:00	29	0	0	0	0
2012-04-28 09:40:00	106.275	2012-04-28 09:40:00	30	0	0	0	0
2012-04-28 10:00:00	106.362	2012-04-28 10:00:00	31	0	0	0	0
2012-04-28 10:20:00	106.405	2012-04-28 10:20:00	32	0	0	0	0
2012-04-28 10:40:00	106.357	2012-04-28 10:40:00	33	0	0	0	0
2012-04-28 11:00:00	106.51	2012-04-28 11:00:00	34	0	0	0	0
2012-04-28 11:20:00	106.423	2012-04-28 11:20:00	35	0	0	0	0
2012-04-28 11:40:00	106.253	2012-04-28 11:40:00	36	0	0	0	0
2012-04-28 12:00:00	106.175	2012-04-28 12:00:00	37	0	0	0	0
2012-04-28 12:20:00	106.379	2012-04-28 12:20:00	38	0	0	0	0
2012-04-28 12:40:00	106.421	2012-04-28 12:40:00	39	0	0	0	0
2012-04-28 13:00:00	106.344	2012-04-28 13:00:00	40	0	0	0	0
2012-04-28 13:20:00	119.78	2012-04-28 13:20:00	41	0	0	0	0
2012-04-28 13:40:00	106.385	2012-04-28 13:40:00	42	0	0	0	0
2012-04-28 14:00:00	106.436	2012-04-28 14:00:00	43	0	0	0	0
2012-04-28 14:20:00	106.28	2012-04-28 14:20:00	44	0	0	0	0
2012-04-28 14:40:00	106.389	2012-04-28 14:40:00	45	0	0	0	0
2012-04-28 15:00:00	106.276	2012-04-28 15:00:00	46	0	0	0	0
2012-04-28 15:20:00	106.379	2012-04-28 15:20:00	47	0	0	0	0
2012-04-28 15:40:00	106.448	2012-04-28 15:40:00	48	0	0	0	0
2012-04-28 16:00:00	106.317	2012-04-28 16:00:00	49	0	0	0	0
2012-04-28 16:20:00	106.246	2012-04-28 16:20:00	50	0	0	0	0
2012-04-28 16:40:00	106.452	2012-04-28 16:40:00	51	0	0	0	0
2012-04-28 17:00:00	106.362	2012-04-28 17:00:00	52	0	0	0	0
2012-04-28 17:20:00	107.804	2012-04-28 17:20:00	53	0	0	0	0
2012-04-28 17:40:00	106.403	2012-04-28 17:40:00	54	0	0	0	0
2012-04-28 18:00:00	106.188	2012-04-28 18:00:00	55	0	0	0	0
2012-04-28 18:20:00	106.307	2012-04-28 18:20:00	56	0	0	0	0
2012-04-28 18:40:00	106.389	2012-04-28 18:40:00	57	0	0	0	0
2012-04-28 19:00:00	107.148	2012-04-28 19:00:00	58	0	0	0	0
2012-04-28 19:20:00	106.379	2012-04-28 19:20:00	59	0	0	0	0
2012-04-28 19:40:00	106.697	2012-04-28 19:40:00	60	0	0	0	0
2012-04-28 20:00:00	106.342	2012-04-28 20:00:00	61	0	0	0	0
2012-04-28 20:20:00	106.401	2012-04-28 20:20:00	62	0	0	0	0
2012-04-28 20:40:00	106.348	2012-04-28 20:40:00	63	0	0	0	0
2012-04-28 21:00:00	106.491	2012-04-28 21:00:00	64	0	0	0	0
2012-04-28 21:20:00	106.452	2012-04-28 21:20:00	65	0	0	0	0
2012-04-28 21:40:00	106.387	2012-04-28 21:40:00	66	0	0	0	0
2012-04-28 22:00:00	106.472	2012-04-28 22:00:00	67	0	0	0	0
2012-04-28 22:20:00	106.365	2012-04-28 22:20:00	68	0	0	0	0
2012-04-28 22:40:00	106.724	2012-04-28 22:40:00	69	0	0	0	0
2012-04-28 23:00:00	106.476	2012-04-28 23:00:00	70	0	0	0	0
2012-04-28 23:20:00	106.339	2012-04-28 23:20:00	71	0	0	0	0
2012-04-28 23:40:00	106.492	2012-04-28 23:40:00	72	0	0	0	0
2012-04-29	106.422	2012-04-29	1	0	0	0	0
2012-04-29 00:20:00	106.297	2012-04-29 00:20:00	2	0	0	0	0
2012-04-29 00:40:00	106.374	2012-04-29 00:40:00	3	0	0	0	0
2012-04-29 01:00:00	106.604	2012-04-29 01:00:00	4	0	0	0	0
2012-04-29 01:20:00	106.547	2012-04-29 01:20:00	5	0	0	0	0
2012-04-29 01:40:00	106.461	2012-04-29 01:40:00	6	0	0	0	0
2012-04-29 02:00:00	106.539	2012-04-29 02:00:00	7	0	0	0	0
2012-04-29 02:20:00	106.565	2012-04-29 02:20:00	8	0	0	0	0
2012-04-29 02:40:00	106.569	2012-04-29 02:40:00	9	0	0	0	0
2012-04-29 03:00:00	106.657	2012-04-29 03:00:00	10	0	0	0	0
2012-04-29 03:20:00	106.551	2012-04-29 03:20:00	11	0	0	0	0
2012-04-29 03:40:00	108.638	2012-04-29 03:40:00	12	0	0	0	0
2012-04-29 04:00:00	106.607	2012-04-29 04:00:00	13	0	0	0	0
2012-04-29 04:20:00	106.408	2012-04-29 04:20:00	14	0	0	0	0
2012-04-29 04:40:00	106.559	2012-04-29 04:40:00	15	0	0	0	0
2012-04-29 05:00:00	106.531	2012-04-29 05:00:00	16	0	0	0	0
2012-04-29 05:20:00	106.684	2012-04-29 05:20:00	17	0	0	0	0
2012-04-29 05:40:00	106.567	2012-04-29 05:40:00	18	0	0	0	0
2012-04-29 06:00:00	106.61	2012-04-29 06:00:00	19	0	0	0	0
2012-04-29 06:20:00	106.633	2012-04-29 06:20:00	20	0	0	0	0
2012-04-29 06:40:00	106.384	2012-04-29 06:40:00	21	0	0	0	0
2012-04-29 07:00:00	106.376	2012-04-29 07:00:00	22	0	0	0	0
2012-04-29 07:20:00	106.384	2012-04-29 07:20:00	23	0	0	0	0
2012-04-29 07:40:00	106.869	2012-04-29 07:40:00	24	0	0	0	0
2012-04-29 08:00:00	113.052	2012-04-29 08:00:00	25	0	0	0	0
2012-04-29 08:20:00	106.527	2012-04-29 08:20:00	26	0	0	0	0
2012-04-29 08:40:00	106.626	2012-04-29 08:40:00	27	0	0	0	0
2012-04-29 09:00:00	106.169	2012-04-29 09:00:00	28	0	0	0	0
2012-04-29 09:20:00	106.178	2012-04-29 09:20:00	29	0	0	0	0
2012-04-29 09:40:00	110.256	2012-04-29 09:40:00	30	0	0	0	0
2012-04-29 10:00:00	106.562	2012-04-29 10:00:00	31	0	0	0	0
2012-04-29 10:20:00	106.428	2012-04-29 10:20:00	32	0	0	0	0
2012-04-29 10:40:00	106.205	2012-04-29 10:40:00	33	0	0	0	0
2012-04-29 11:00:00	106.087	2012-04-29 11:00:00	34	0	0	0	0
2012-04-29 11:20:00	106.328	2012-04-29 11:20:00	35	0	0	0	0
2012-04-29 11:40:00	106.203	2012-04-29 11:40:00	36	0	0	0	0
2012-04-29 12:00:00	116.244	2012-04-29 12:00:00	37	0	0	0	0
2012-04-29 12:20:00	111.148	2012-04-29 12:20:00	38	0	0	0	0
2012-04-29 12:40:00	106.272	2012-04-29 12:40:00	39	0	0	0	0
2012-04-29 13:00:00	106.38	2012-04-29 13:00:00	40	0	0	0	0
2012-04-29 13:20:00	106.16	2012-04-29 13:20:00	41	0	0	0	0
2012-04-29 13:40:00	106.216	2012-04-29 13:40:00	42	0	0	0	0
2012-04-29 14:00:00	106.418	2012-04-29 14:00:00	43	0	0	0	0
2012-04-29 14:20:00	106.366	2012-04-29 14:20:00	44	0	0	0	0
2012-04-29 14:40:00	106.287	2012-04-29 14:40:00	45	0	0	0	0
2012-04-29 15:00:00	106.396	2012-04-29 15:00:00	46	0	0	0	0
2012-04-29 15:20:00	106.328	2012-04-29 15:20:00	47	0	0	0	0
2012-04-29 15:40:00	106.308	2012-04-29 15:40:00	48	0	0	0	0
2012-04-29 16:00:00	106.371	2012-04-29 16:00:00	49	0	0	0	0
2012-04-29 16:20:00	106.408	2012-04-29 16:20:00	50	0	0	0	0
2012-04-29 16:40:00	106.385	2012-04-29 16:40:00	51	0	0	0	0
2012-04-29 17:00:00	106.537	2012-04-29 17:00:00	52	0	0	0	0
2012-04-29 17:20:00	106.316	2012-04-29 17:20:00	53	0	0	0	0
2012-04-29 17:40:00	116.505	2012-04-29 17:40:00	54	0	0	0	0
2012-04-29 18:00:00	106.414	2012-04-29 18:00:00	55	0	0	0	0
2012-04-29 18:20:00	106.356	2012-04-29 18:20:00	56	0	0	0	0
2012-04-29 18:40:00	106.758	2012-04-29 18:40:00	57	0	0	0	0
2012-04-29 19:00:00	106.5	2012-04-29 19:00:00	58	0	0	0	0
2012-04-29 19:20:00	108.462	2012-04-29 19:20:00	59	2	0	0	2
2012-04-29 19:40:00	110.3	2012-04-29 19:40:00	60	29	4	0	33
2012-04-29 20:00:00	106.484	2012-04-29 20:00:00	61	0	0	0	0
2012-04-29 20:20:00	106.636	2012-04-29 20:20:00	62	0	0	0	0
2012-04-29 20:40:00	106.273	2012-04-29 20:40:00	63	0	0	0	0
2012-04-29 21:00:00	106.546	2012-04-29 21:00:00	64	0	0	0	0
2012-04-29 21:20:00	107.539	2012-04-29 21:20:00	65	19	0	0	19
2012-04-29 21:40:00	107.593	2012-04-29 21:40:00	66	16	0	0	16
2012-04-29 22:00:00	107.062	2012-04-29 22:00:00	67	0	0	0	0
2012-04-29 22:20:00	106.875	2012-04-29 22:20:00	68	0	0	0	0
2012-04-29 22:40:00	106.418	2012-04-29 22:40:00	69	0	0	0	0
2012-04-29 23:00:00	106.336	2012-04-29 23:00:00	70	0	0	0	0
2012-04-29 23:20:00	106.515	2012-04-29 23:20:00	71	0	0	0	0
2012-04-29 23:40:00	106.426	2012-04-29 23:40:00	72	0	0	0	0
2012-04-30	106.419	2012-04-30	1	0	0	0	0
2012-04-30 00:20:00	106.444	2012-04-30 00:20:00	2	0	0	0	0
2012-04-30 00:40:00	106.385	2012-04-30 00:40:00	3	0	0	0	0
2012-04-30 01:00:00	107.02	2012-04-30 01:00:00	4	0	0	0	0
2012-04-30 01:20:00	106.578	2012-04-30 01:20:00	5	0	0	0	0
2012-04-30 01:40:00	106.612	2012-04-30 01:40:00	6	0	0	0	0
2012-04-30 02:00:00	106.732	2012-04-30 02:00:00	7	0	0	0	0
2012-04-30 02:20:00	106.329	2012-04-30 02:20:00	8	0	0	0	0
2012-04-30 02:40:00	106.417	2012-04-30 02:40:00	9	0	0	0	0
2012-04-30 03:00:00	106.373	2012-04-30 03:00:00	10	0	0	0	0
2012-04-30 03:20:00	106.611	2012-04-30 03:20:00	11	0	0	0	0
2012-04-30 03:40:00	106.484	2012-04-30 03:40:00	12	0	0	0	0
2012-04-30 04:00:00	106.47	2012-04-30 04:00:00	13	0	0	0	0
2012-04-30 04:20:00	106.518	2012-04-30 04:20:00	14	0	0	0	0
2012-04-30 04:40:00	106.644	2012-04-30 04:40:00	15	0	0	0	0
2012-04-30 05:00:00	106.348	2012-04-30 05:00:00	16	0	0	0	0
2012-04-30 05:20:00	106.393	2012-04-30 05:20:00	17	0	0	0	0
2012-04-30 05:40:00	106.534	2012-04-30 05:40:00	18	0	0	0	0
2012-04-30 06:00:00	106.366	2012-04-30 06:00:00	19	0	0	0	0
2012-04-30 06:20:00	106.45	2012-04-30 06:20:00	20	0	0	0	0
2012-04-30 06:40:00	106.528	2012-04-30 06:40:00	21	0	0	0	0
2012-04-30 07:00:00	122.493	2012-04-30 07:00:00	22	0	0	0	0
2012-04-30 07:20:00	111.197	2012-04-30 07:20:00	23	0	0	0	0
2012-04-30 07:40:00	106.37	2012-04-30 07:40:00	24	0	0	0	0
2012-04-30 08:00:00	106.506	2012-04-30 08:00:00	25	0	0	0	0
2012-04-30 08:20:00	111.184	2012-04-30 08:20:00	26	0	0	0	0
2012-04-30 08:40:00	107.468	2012-04-30 08:40:00	27	0	0	0	0
2012-04-30 09:00:00	106.525	2012-04-30 09:00:00	28	0	0	0	0
2012-04-30 09:20:00	106.399	2012-04-30 09:20:00	29	0	0	0	0
2012-04-30 09:40:00	109.658	2012-04-30 09:40:00	30	0	0	0	0
2012-04-30 10:00:00	106.359	2012-04-30 10:00:00	31	0	0	0	0
2012-04-30 10:20:00	107.474	2012-04-30 10:20:00	32	7	9	0	16
2012-04-30 10:40:00	106.566	2012-04-30 10:40:00	33	0	0	0	0
2012-04-30 11:00:00	106.526	2012-04-30 11:00:00	34	0	0	0	0
2012-04-30 11:20:00	106.361	2012-04-30 11:20:00	35	0	0	0	0
2012-04-30 11:40:00	106.443	2012-04-30 11:40:00	36	0	0	0	0
2012-04-30 12:00:00	106.841	2012-04-30 12:00:00	37	0	0	0	0
2012-04-30 12:20:00	106.729	2012-04-30 12:20:00	38	0	0	0	0
2012-04-30 12:40:00	106.727	2012-04-30 12:40:00	39	0	0	0	0
2012-04-30 13:00:00	106.414	2012-04-30 13:00:00	40	0	0	0	0
2012-04-30 13:20:00	117.93	2012-04-30 13:20:00	41	0	0	0	0
2012-04-30 13:40:00	106.527	2012-04-30 13:40:00	42	0	0	0	0
2012-04-30 14:00:00	106.298	2012-04-30 14:00:00	43	0	0	0	0
2012-04-30 14:20:00	106.569	2012-04-30 14:20:00	44	0	0	0	0
2012-04-30 14:40:00	106.344	2012-04-30 14:40:00	45	0	0	0	0
2012-04-30 15:00:00	109.113	2012-04-30 15:00:00	46	0	0	0	0
2012-04-30 15:20:00	108.625	2012-04-30 15:20:00	47	0	0	0	0
2012-04-30 15:40:00	106.28	2012-04-30 15:40:00	48	0	0	0	0
2012-04-30 16:00:00	106.348	2012-04-30 16:00:00	49	0	0	0	0
2012-04-30 16:20:00	106.786	2012-04-30 16:20:00	50	0	0	0	0
2012-04-30 16:40:00	106.82	2012-04-30 16:40:00	51	0	0	0	0
2012-04-30 17:00:00	106.81	2012-04-30 17:00:00	52	0	0	0	0
2012-04-30 17:20:00	106.847	2012-04-30 17:20:00	53	0	0	0	0
2012-04-30 17:40:00	108.318	2012-04-30 17:40:00	54	0	0	0	0
2012-04-30 18:00:00	106.801	2012-04-30 18:00:00	55	0	0	0	0
2012-04-30 18:20:00	111.366	2012-04-30 18:20:00	56	0	0	0	0
2012-04-30 18:40:00	105.136	2012-04-30 18:40:00	57	0	0	0	0
2012-04-30 19:00:00	105.099	2012-04-30 19:00:00	58	0	0	0	0
2012-04-30 19:20:00	105.141	2012-04-30 19:20:00	59	0	0	0	0
2012-04-30 19:40:00	104.972	2012-04-30 19:40:00	60	0	0	0	0
2012-04-30 20:00:00	105.069	2012-04-30 20:00:00	61	0	0	0	0
2012-04-30 20:20:00	104.89	2012-04-30 20:20:00	62	0	0	0	0
2012-04-30 20:40:00	106.714	2012-04-30 20:40:00	63	0	0	0	0
2012-04-30 21:00:00	104.622	2012-04-30 21:00:00	64	0	0	0	0
2012-04-30 21:20:00	104.634	2012-04-30 21:20:00	65	0	0	0	0
2012-04-30 21:40:00	104.43	2012-04-30 21:40:00	66	0	0	0	0
2012-04-30 22:00:00	104.511	2012-04-30 22:00:00	67	0	0	0	0
2012-04-30 22:20:00	104.59	2012-04-30 22:20:00	68	0	0	0	0
2012-04-30 22:40:00	104.673	2012-04-30 22:40:00	69	0	0	0	0
2012-04-30 23:00:00	104.507	2012-04-30 23:00:00	70	0	0	0	0
2012-04-30 23:20:00	104.78	2012-04-30 23:20:00	71	0	0	0	0
2012-04-30 23:40:00	104.559	2012-04-30 23:40:00	72	0	0	0	0
2012-05-01	104.758	2012-05-01	1	0	0	0	0
2012-05-01 00:20:00	104.864	2012-05-01 00:20:00	2	0	0	0	0
2012-05-01 00:40:00	104.729	2012-05-01 00:40:00	3	0	0	0	0
2012-05-01 01:00:00	104.714	2012-05-01 01:00:00	4	0	0	0	0
2012-05-01 01:20:00	104.747	2012-05-01 01:20:00	5	0	0	0	0
2012-05-01 01:40:00	104.609	2012-05-01 01:40:00	6	0	0	0	0
2012-05-01 02:00:00	104.857	2012-05-01 02:00:00	7	0	0	0	0
2012-05-01 02:20:00	104.713	2012-05-01 02:20:00	8	0	0	0	0
2012-05-01 02:40:00	104.637	2012-05-01 02:40:00	9	0	0	0	0
2012-05-01 03:00:00	104.678	2012-05-01 03:00:00	10	0	0	0	0
2012-05-01 03:20:00	104.635	2012-05-01 03:20:00	11	0	0	0	0
2012-05-01 03:40:00	104.481	2012-05-01 03:40:00	12	0	0	0	0
2012-05-01 04:00:00	104.565	2012-05-01 04:00:00	13	0	0	0	0
2012-05-01 04:20:00	104.501	2012-05-01 04:20:00	14	0	0	0	0
2012-05-01 04:40:00	104.709	2012-05-01 04:40:00	15	0	0	0	0
2012-05-01 05:00:00	104.592	2012-05-01 05:00:00	16	0	0	0	0
2012-05-01 05:20:00	104.407	2012-05-01 05:20:00	17	0	0	0	0
2012-05-01 05:40:00	104.64	2012-05-01 05:40:00	18	0	0	0	0
2012-05-01 06:00:00	104.54	2012-05-01 06:00:00	19	0	0	0	0
2012-05-01 06:20:00	104.372	2012-05-01 06:20:00	20	0	0	0	0
2012-05-01 06:40:00	104.377	2012-05-01 06:40:00	21	0	0	0	0
2012-05-01 07:00:00	104.556	2012-05-01 07:00:00	22	0	0	0	0
2012-05-01 07:20:00	104.512	2012-05-01 07:20:00	23	0	0	0	0
2012-05-01 07:40:00	104.465	2012-05-01 07:40:00	24	0	0	0	0
2012-05-01 08:00:00	104.414	2012-05-01 08:00:00	25	0	0	0	0
2012-05-01 08:20:00	104.42	2012-05-01 08:20:00	26	0	0	0	0
2012-05-01 08:40:00	105.029	2012-05-01 08:40:00	27	0	0	0	0
2012-05-01 09:00:00	104.882	2012-05-01 09:00:00	28	0	0	0	0
2012-05-01 09:20:00	113.886	2012-05-01 09:20:00	29	0	0	0	0
2012-05-01 09:40:00	105.722	2012-05-01 09:40:00	30	0	0	0	0
2012-05-01 10:00:00	111.766	2012-05-01 10:00:00	31	0	0	0	0
2012-05-01 10:20:00	118.964	2012-05-01 10:20:00	32	0	0	0	0
2012-05-01 10:40:00	105.534	2012-05-01 10:40:00	33	0	0	0	0
2012-05-01 11:00:00	105.505	2012-05-01 11:00:00	34	0	0	0	0
2012-05-01 11:20:00	105.467	2012-05-01 11:20:00	35	0	0	0	0
2012-05-01 11:40:00	105.271	2012-05-01 11:40:00	36	0	0	0	0
2012-05-01 12:00:00	105.088	2012-05-01 12:00:00	37	0	0	0	0
2012-05-01 12:20:00	104.953	2012-05-01 12:20:00	38	0	0	0	0
2012-05-01 12:40:00	105.079	2012-05-01 12:40:00	39	0	0	0	0
2012-05-01 13:00:00	121.474	2012-05-01 13:00:00	40	0	0	0	0
2012-05-01 13:20:00	104.84	2012-05-01 13:20:00	41	0	0	0	0
2012-05-01 13:40:00	108.123	2012-05-01 13:40:00	42	0	0	0	0
2012-05-01 14:00:00	105.248	2012-05-01 14:00:00	43	0	0	0	0
2012-05-01 14:20:00	104.608	2012-05-01 14:20:00	44	0	0	0	0
2012-05-01 14:40:00	104.373	2012-05-01 14:40:00	45	0	0	0	0
2012-05-01 15:00:00	104.591	2012-05-01 15:00:00	46	0	0	0	0
2012-05-01 15:20:00	104.482	2012-05-01 15:20:00	47	0	0	0	0
2012-05-01 15:40:00	104.369	2012-05-01 15:40:00	48	0	0	0	0
2012-05-01 16:00:00	111.249	2012-05-01 16:00:00	49	0	0	0	0
2012-05-01 16:20:00	104.53	2012-05-01 16:20:00	50	0	0	0	0
2012-05-01 16:40:00	105.633	2012-05-01 16:40:00	51	0	0	0	0
2012-05-01 17:00:00	104.54	2012-05-01 17:00:00	52	0	0	0	0
2012-05-01 17:20:00	104.567	2012-05-01 17:20:00	53	0	0	0	0
2012-05-01 17:40:00	104.6	2012-05-01 17:40:00	54	0	0	0	0
2012-05-01 18:00:00	116.706	2012-05-01 18:00:00	55	0	0	0	0
2012-05-01 18:20:00	116.652	2012-05-01 18:20:00	56	0	0	0	0
2012-05-01 18:40:00	104.714	2012-05-01 18:40:00	57	0	0	0	0
2012-05-01 19:00:00	115.354	2012-05-01 19:00:00	58	0	0	0	0
2012-05-01 19:20:00	104.407	2012-05-01 19:20:00	59	0	0	0	0
2012-05-01 19:40:00	104.614	2012-05-01 19:40:00	60	0	0	0	0
2012-05-01 20:00:00	104.707	2012-05-01 20:00:00	61	0	0	0	0
2012-05-01 20:20:00	115.873	2012-05-01 20:20:00	62	0	0	0	0
2012-05-01 20:40:00	104.506	2012-05-01 20:40:00	63	0	0	0	0
2012-05-01 21:00:00	104.546	2012-05-01 21:00:00	64	0	0	0	0
2012-05-01 21:20:00	104.813	2012-05-01 21:20:00	65	0	0	0	0
2012-05-01 21:40:00	120.585	2012-05-01 21:40:00	66	0	0	0	0
2012-05-01 22:00:00	104.899	2012-05-01 22:00:00	67	0	0	0	0
2012-05-01 22:20:00	104.852	2012-05-01 22:20:00	68	0	0	0	0
2012-05-01 22:40:00	105.217	2012-05-01 22:40:00	69	0	0	0	0
2012-05-01 23:00:00	104.794	2012-05-01 23:00:00	70	0	0	0	0
2012-05-01 23:20:00	107.042	2012-05-01 23:20:00	71	0	0	0	0
2012-05-01 23:40:00	104.907	2012-05-01 23:40:00	72	0	0	0	0
2012-05-02	104.979	2012-05-02	1	0	0	0	0
2012-05-02 00:20:00	105.115	2012-05-02 00:20:00	2	0	0	0	0
2012-05-02 00:40:00	105.15	2012-05-02 00:40:00	3	0	0	0	0
2012-05-02 01:00:00	105.022	2012-05-02 01:00:00	4	0	0	0	0
2012-05-02 01:20:00	105.138	2012-05-02 01:20:00	5	0	0	0	0
2012-05-02 01:40:00	105.169	2012-05-02 01:40:00	6	0	0	0	0
2012-05-02 02:00:00	105.083	2012-05-02 02:00:00	7	0	0	0	0
2012-05-02 02:20:00	105.249	2012-05-02 02:20:00	8	0	0	0	0
2012-05-02 02:40:00	105.36	2012-05-02 02:40:00	9	0	0	0	0
2012-05-02 03:00:00	105.303	2012-05-02 03:00:00	10	0	0	0	0
2012-05-02 03:20:00	120.065	2012-05-02 03:20:00	11	0	0	0	0
2012-05-02 03:40:00	105.046	2012-05-02 03:40:00	12	0	0	0	0
2012-05-02 04:00:00	105.065	2012-05-02 04:00:00	13	0	0	0	0
2012-05-02 04:20:00	105.232	2012-05-02 04:20:00	14	0	0	0	0
2012-05-02 04:40:00	119.967	2012-05-02 04:40:00	15	0	0	0	0
2012-05-02 05:00:00	105.034	2012-05-02 05:00:00	16	0	0	0	0
2012-05-02 05:20:00	105.111	2012-05-02 05:20:00	17	0	0	0	0
2012-05-02 05:40:00	104.962	2012-05-02 05:40:00	18	0	0	0	0
2012-05-02 06:00:00	104.924	2012-05-02 06:00:00	19	0	0	0	0
2012-05-02 06:20:00	105.015	2012-05-02 06:20:00	20	0	0	0	0
2012-05-02 06:40:00	105.228	2012-05-02 06:40:00	21	0	0	0	0
2012-05-02 07:00:00	105.092	2012-05-02 07:00:00	22	0	0	0	0
2012-05-02 07:20:00	115.825	2012-05-02 07:20:00	23	0	0	0	0
2012-05-02 07:40:00	106.335	2012-05-02 07:40:00	24	0	0	0	0
2012-05-02 08:00:00	105.205	2012-05-02 08:00:00	25	0	0	0	0
2012-05-02 08:20:00	105.354	2012-05-02 08:20:00	26	0	0	0	0
2012-05-02 08:40:00	106.158	2012-05-02 08:40:00	27	0	0	0	0
2012-05-02 09:00:00	104.987	2012-05-02 09:00:00	28	0	0	0	0
2012-05-02 09:20:00	109.83	2012-05-02 09:20:00	29	0	0	0	0
2012-05-02 09:40:00	105.064	2012-05-02 09:40:00	30	0	0	0	0
2012-05-02 10:00:00	105.113	2012-05-02 10:00:00	31	0	0	0	0
2012-05-02 10:20:00	105.122	2012-05-02 10:20:00	32	0	0	0	0
2012-05-02 10:40:00	105.159	2012-05-02 10:40:00	33	0	0	0	0
2012-05-02 11:00:00	105.149	2012-05-02 11:00:00	34	0	0	0	0
2012-05-02 11:20:00	105.244	2012-05-02 11:20:00	35	0	0	0	0
2012-05-02 11:40:00	105.263	2012-05-02 11:40:00	36	0	0	0	0
2012-05-02 12:00:00	105.41	2012-05-02 12:00:00	37	0	0	0	0
2012-05-02 12:20:00	105.235	2012-05-02 12:20:00	38	0	0	0	0
2012-05-02 12:40:00	105.438	2012-05-02 12:40:00	39	0	0	0	0
2012-05-02 13:00:00	105.359	2012-05-02 13:00:00	40	0	0	0	0
2012-05-02 13:20:00	105.759	2012-05-02 13:20:00	41	0	0	0	0
2012-05-02 13:40:00	106.846	2012-05-02 13:40:00	42	0	0	0	0
2012-05-02 14:00:00	106.77	2012-05-02 14:00:00	43	0	0	0	0
2012-05-02 14:20:00	114.987	2012-05-02 14:20:00	44	0	0	0	0
2012-05-02 14:40:00	105.83	2012-05-02 14:40:00	45	0	0	0	0
2012-05-02 15:00:00	105.358	2012-05-02 15:00:00	46	0	0	0	0
2012-05-02 15:20:00	105.367	2012-05-02 15:20:00	47	0	0	0	0
2012-05-02 15:40:00	105.3	2012-05-02 15:40:00	48	0	0	0	0
2012-05-02 16:00:00	105.215	2012-05-02 16:00:00	49	0	0	0	0
2012-05-02 16:20:00	105.081	2012-05-02 16:20:00	50	0	0	0	0
2012-05-02 16:40:00	105.037	2012-05-02 16:40:00	51	0	0	0	0
2012-05-02 17:00:00	105.181	2012-05-02 17:00:00	52	0	0	0	0
2012-05-02 17:20:00	105.17	2012-05-02 17:20:00	53	0	0	0	0
2012-05-02 17:40:00	104.949	2012-05-02 17:40:00	54	0	0	0	0
2012-05-02 18:00:00	105.144	2012-05-02 18:00:00	55	0	0	0	0
2012-05-02 18:20:00	105.401	2012-05-02 18:20:00	56	0	0	0	0
2012-05-02 18:40:00	105.271	2012-05-02 18:40:00	57	0	0	0	0
2012-05-02 19:00:00	105.213	2012-05-02 19:00:00	58	0	0	0	0
2012-05-02 19:20:00	104.927	2012-05-02 19:20:00	59	0	0	0	0
2012-05-02 19:40:00	105	2012-05-02 19:40:00	60	0	0	0	0
2012-05-02 20:00:00	105.095	2012-05-02 20:00:00	61	0	0	0	0
2012-05-02 20:20:00	104.947	2012-05-02 20:20:00	62	0	0	0	0
2012-05-02 20:40:00	106.199	2012-05-02 20:40:00	63	0	0	0	0
2012-05-02 21:00:00	105.19	2012-05-02 21:00:00	64	0	0	0	0
2012-05-02 21:20:00	105.099	2012-05-02 21:20:00	65	0	0	0	0
2012-05-02 21:40:00	104.954	2012-05-02 21:40:00	66	0	0	0	0
2012-05-02 22:00:00	104.953	2012-05-02 22:00:00	67	0	0	0	0
2012-05-02 22:20:00	105.215	2012-05-02 22:20:00	68	0	0	0	0
2012-05-02 22:40:00	105.161	2012-05-02 22:40:00	69	0	0	0	0
2012-05-02 23:00:00	105.256	2012-05-02 23:00:00	70	0	0	0	0
2012-05-02 23:20:00	105.068	2012-05-02 23:20:00	71	0	0	0	0
2012-05-02 23:40:00	104.94	2012-05-02 23:40:00	72	0	0	0	0
2012-05-03	105.133	2012-05-03	1	0	0	0	0
2012-05-03 00:20:00	105.15	2012-05-03 00:20:00	2	0	0	0	0
2012-05-03 00:40:00	105.146	2012-05-03 00:40:00	3	0	0	0	0
2012-05-03 01:00:00	104.976	2012-05-03 01:00:00	4	0	0	0	0
2012-05-03 01:20:00	105.119	2012-05-03 01:20:00	5	0	0	0	0
2012-05-03 01:40:00	105.002	2012-05-03 01:40:00	6	0	0	0	0
2012-05-03 02:00:00	105.192	2012-05-03 02:00:00	7	0	0	0	0
2012-05-03 02:20:00	105.209	2012-05-03 02:20:00	8	0	0	0	0
2012-05-03 02:40:00	105.085	2012-05-03 02:40:00	9	0	0	0	0
2012-05-03 03:00:00	105.23	2012-05-03 03:00:00	10	0	0	0	0
2012-05-03 03:20:00	105.279	2012-05-03 03:20:00	11	0	0	0	0
2012-05-03 03:40:00	105.235	2012-05-03 03:40:00	12	0	0	0	0
2012-05-03 04:00:00	105.108	2012-05-03 04:00:00	13	0	0	0	0
2012-05-03 04:20:00	106.093	2012-05-03 04:20:00	14	0	0	0	0
2012-05-03 04:40:00	105.158	2012-05-03 04:40:00	15	0	0	0	0
2012-05-03 05:00:00	107.631	2012-05-03 05:00:00	16	0	0	0	0
2012-05-03 05:20:00	105.131	2012-05-03 05:20:00	17	0	0	0	0
2012-05-03 05:40:00	104.867	2012-05-03 05:40:00	18	0	0	0	0
2012-05-03 06:00:00	105.077	2012-05-03 06:00:00	19	0	0	0	0
2012-05-03 06:20:00	105.048	2012-05-03 06:20:00	20	0	0	0	0
2012-05-03 06:40:00	105.419	2012-05-03 06:40:00	21	0	0	0	0
2012-05-03 07:00:00	105.274	2012-05-03 07:00:00	22	0	0	0	0
2012-05-03 07:20:00	104.902	2012-05-03 07:20:00	23	0	0	0	0
2012-05-03 07:40:00	104.768	2012-05-03 07:40:00	24	0	0	0	0
2012-05-03 08:00:00	104.777	2012-05-03 08:00:00	25	0	0	0	0
2012-05-03 08:20:00	104.828	2012-05-03 08:20:00	26	0	0	0	0
2012-05-03 08:40:00	104.814	2012-05-03 08:40:00	27	0	0	0	0
2012-05-03 09:00:00	109.762	2012-05-03 09:00:00	28	0	0	0	0
2012-05-03 09:20:00	104.989	2012-05-03 09:20:00	29	0	0	0	0
2012-05-03 09:40:00	104.705	2012-05-03 09:40:00	30	0	0	0	0
2012-05-03 10:00:00	113.046	2012-05-03 10:00:00	31	0	0	0	0
2012-05-03 10:20:00	105.188	2012-05-03 10:20:00	32	0	0	0	0
2012-05-03 10:40:00	104.972	2012-05-03 10:40:00	33	0	0	0	0
2012-05-03 11:00:00	105.233	2012-05-03 11:00:00	34	0	0	0	0
2012-05-03 11:20:00	105.047	2012-05-03 11:20:00	35	0	0	0	0
2012-05-03 11:40:00	104.998	2012-05-03 11:40:00	36	0	0	0	0
2012-05-03 12:00:00	105.055	2012-05-03 12:00:00	37	0	0	0	0
2012-05-03 12:20:00	104.959	2012-05-03 12:20:00	38	0	0	0	0
2012-05-03 12:40:00	104.912	2012-05-03 12:40:00	39	0	0	0	0
2012-05-03 13:00:00	105.004	2012-05-03 13:00:00	40	0	0	0	0
2012-05-03 13:20:00	105.409	2012-05-03 13:20:00	41	0	0	0	0
2012-05-03 13:40:00	113.976	2012-05-03 13:40:00	42	0	0	0	0
2012-05-03 14:00:00	105.326	2012-05-03 14:00:00	43	0	0	0	0
2012-05-03 14:20:00	105.241	2012-05-03 14:20:00	44	0	0	0	0
2012-05-03 14:40:00	105.192	2012-05-03 14:40:00	45	0	0	0	0
2012-05-03 15:00:00	105.639	2012-05-03 15:00:00	46	0	0	0	0
2012-05-03 15:20:00	112.806	2012-05-03 15:20:00	47	0	0	0	0
2012-05-03 15:40:00	105.204	2012-05-03 15:40:00	48	0	0	0	0
2012-05-03 16:00:00	105.271	2012-05-03 16:00:00	49	0	0	0	0
2012-05-03 16:20:00	105.232	2012-05-03 16:20:00	50	0	0	0	0
2012-05-03 16:40:00	105.408	2012-05-03 16:40:00	51	0	0	0	0
2012-05-03 17:00:00	105.373	2012-05-03 17:00:00	52	0	0	0	0
2012-05-03 17:20:00	105.396	2012-05-03 17:20:00	53	0	0	0	0
2012-05-03 17:40:00	105.557	2012-05-03 17:40:00	54	0	0	0	0
2012-05-03 18:00:00	105.342	2012-05-03 18:00:00	55	0	0	0	0
2012-05-03 18:20:00	105.253	2012-05-03 18:20:00	56	0	0	0	0
2012-05-03 18:40:00	105.788	2012-05-03 18:40:00	57	0	0	0	0
2012-05-03 19:00:00	105.675	2012-05-03 19:00:00	58	0	0	0	0
2012-05-03 19:20:00	105.722	2012-05-03 19:20:00	59	0	0	0	0
2012-05-03 19:40:00	105.561	2012-05-03 19:40:00	60	0	0	0	0
2012-05-03 20:00:00	105.537	2012-05-03 20:00:00	61	0	0	0	0
2012-05-03 20:20:00	105.378	2012-05-03 20:20:00	62	0	0	0	0
2012-05-03 20:40:00	105.529	2012-05-03 20:40:00	63	0	0	0	0
2012-05-03 21:00:00	105.501	2012-05-03 21:00:00	64	0	0	0	0
2012-05-03 21:20:00	105.48	2012-05-03 21:20:00	65	0	0	0	0
2012-05-03 21:40:00	105.351	2012-05-03 21:40:00	66	0	0	0	0
2012-05-03 22:00:00	105.611	2012-05-03 22:00:00	67	0	0	0	0
2012-05-03 22:20:00	105.381	2012-05-03 22:20:00	68	0	0	0	0
2012-05-03 22:40:00	105.524	2012-05-03 22:40:00	69	0	0	0	0
2012-05-03 23:00:00	105.331	2012-05-03 23:00:00	70	0	0	0	0
2012-05-03 23:20:00	105.627	2012-05-03 23:20:00	71	0	0	0	0
2012-05-03 23:40:00	105.34	2012-05-03 23:40:00	72	0	0	0	0
2012-05-04	105.694	2012-05-04	1	0	0	0	0
2012-05-04 00:20:00	105.626	2012-05-04 00:20:00	2	0	0	0	0
2012-05-04 00:40:00	105.569	2012-05-04 00:40:00	3	0	0	0	0
2012-05-04 01:00:00	105.093	2012-05-04 01:00:00	4	0	0	0	0
2012-05-04 01:20:00	105.464	2012-05-04 01:20:00	5	0	0	0	0
2012-05-04 01:40:00	105.333	2012-05-04 01:40:00	6	0	0	0	0
2012-05-04 02:00:00	105.404	2012-05-04 02:00:00	7	0	0	0	0
2012-05-04 02:20:00	105.344	2012-05-04 02:20:00	8	0	0	0	0
2012-05-04 02:40:00	105.533	2012-05-04 02:40:00	9	0	0	0	0
2012-05-04 03:00:00	105.56	2012-05-04 03:00:00	10	0	0	0	0
2012-05-04 03:20:00	105.504	2012-05-04 03:20:00	11	0	0	0	0
2012-05-04 03:40:00	105.551	2012-05-04 03:40:00	12	0	0	0	0
2012-05-04 04:00:00	106.638	2012-05-04 04:00:00	13	0	0	0	0
2012-05-04 04:20:00	105.418	2012-05-04 04:20:00	14	0	0	0	0
2012-05-04 04:40:00	105.311	2012-05-04 04:40:00	15	0	0	0	0
2012-05-04 05:00:00	105.46	2012-05-04 05:00:00	16	0	0	0	0
2012-05-04 05:20:00	105.448	2012-05-04 05:20:00	17	0	0	0	0
2012-05-04 05:40:00	105.354	2012-05-04 05:40:00	18	0	0	0	0
2012-05-04 06:00:00	105.47	2012-05-04 06:00:00	19	0	0	0	0
2012-05-04 06:20:00	105.334	2012-05-04 06:20:00	20	0	0	0	0
2012-05-04 06:40:00	105.526	2012-05-04 06:40:00	21	0	0	0	0
2012-05-04 07:00:00	105.547	2012-05-04 07:00:00	22	0	0	0	0
2012-05-04 07:20:00	105.519	2012-05-04 07:20:00	23	0	0	0	0
2012-05-04 07:40:00	105.592	2012-05-04 07:40:00	24	0	0	0	0
2012-05-04 08:00:00	105.684	2012-05-04 08:00:00	25	0	0	0	0
2012-05-04 08:20:00	105.468	2012-05-04 08:20:00	26	0	0	0	0
2012-05-04 08:40:00	105.445	2012-05-04 08:40:00	27	0	0	0	0
2012-05-04 09:00:00	105.613	2012-05-04 09:00:00	28	0	0	0	0
2012-05-04 09:20:00	105.364	2012-05-04 09:20:00	29	0	0	0	0
2012-05-04 09:40:00	105.322	2012-05-04 09:40:00	30	0	0	0	0
2012-05-04 10:00:00	107.266	2012-05-04 10:00:00	31	0	0	0	0
2012-05-04 10:20:00	115.921	2012-05-04 10:20:00	32	0	0	0	0
2012-05-04 10:40:00	105.3	2012-05-04 10:40:00	33	0	0	0	0
2012-05-04 11:00:00	105.298	2012-05-04 11:00:00	34	0	0	0	0
2012-05-04 11:20:00	105.167	2012-05-04 11:20:00	35	0	0	0	0
2012-05-04 11:40:00	119.799	2012-05-04 11:40:00	36	0	0	0	0
2012-05-04 12:00:00	105.536	2012-05-04 12:00:00	37	0	0	0	0
2012-05-04 12:20:00	105.287	2012-05-04 12:20:00	38	0	0	0	0
2012-05-04 12:40:00	105.714	2012-05-04 12:40:00	39	0	0	0	0
2012-05-04 13:00:00	105.28	2012-05-04 13:00:00	40	0	0	0	0
2012-05-04 13:20:00	105.398	2012-05-04 13:20:00	41	0	0	0	0
2012-05-04 13:40:00	105.311	2012-05-04 13:40:00	42	0	0	0	0
2012-05-04 14:00:00	106.007	2012-05-04 14:00:00	43	0	0	0	0
2012-05-04 14:20:00	105.022	2012-05-04 14:20:00	44	0	0	0	0
2012-05-04 14:40:00	104.888	2012-05-04 14:40:00	45	0	0	0	0
2012-05-04 15:00:00	105.759	2012-05-04 15:00:00	46	0	0	0	0
2012-05-04 15:20:00	105.508	2012-05-04 15:20:00	47	0	0	0	0
2012-05-04 17:00:00	105.667	2012-05-04 17:00:00	52	0	0	0	0
2012-05-04 17:20:00	105.74	2012-05-04 17:20:00	53	0	0	0	0
2012-05-04 17:40:00	105.814	2012-05-04 17:40:00	54	0	0	0	0
2012-05-04 18:00:00	116.945	2012-05-04 18:00:00	55	0	0	0	0
2012-05-04 18:20:00	108.474	2012-05-04 18:20:00	56	0	0	0	0
2012-05-04 18:40:00	108.8	2012-05-04 18:40:00	57	0	0	0	0
2012-05-04 19:00:00	106.487	2012-05-04 19:00:00	58	0	0	0	0
2012-05-04 19:20:00	106.076	2012-05-04 19:20:00	59	0	0	0	0
2012-05-04 19:40:00	106.229	2012-05-04 19:40:00	60	0	0	0	0
2012-05-04 20:00:00	105.92	2012-05-04 20:00:00	61	0	0	0	0
2012-05-04 20:20:00	107.491	2012-05-04 20:20:00	62	0	0	0	0
2012-05-04 20:40:00	106.152	2012-05-04 20:40:00	63	0	0	0	0
2012-05-04 21:00:00	107.057	2012-05-04 21:00:00	64	0	0	0	0
2012-05-04 21:20:00	106.189	2012-05-04 21:20:00	65	0	0	0	0
2012-05-04 21:40:00	106.877	2012-05-04 21:40:00	66	0	0	0	0
2012-05-04 22:00:00	107.175	2012-05-04 22:00:00	67	0	0	0	0
2012-05-04 22:20:00	113.739	2012-05-04 22:20:00	68	0	0	0	0
2012-05-04 22:40:00	109.516	2012-05-04 22:40:00	69	0	0	0	0
2012-05-04 23:00:00	106.439	2012-05-04 23:00:00	70	0	0	0	0
2012-05-04 23:20:00	109.78	2012-05-04 23:20:00	71	0	0	0	0
2012-05-04 23:40:00	106.391	2012-05-04 23:40:00	72	0	0	0	0
2012-05-05	107.421	2012-05-05	1	0	0	0	0
2012-05-05 00:20:00	107.609	2012-05-05 00:20:00	2	0	0	0	0
2012-05-05 00:40:00	117.898	2012-05-05 00:40:00	3	0	0	0	0
2012-05-05 01:00:00	109.587	2012-05-05 01:00:00	4	0	0	0	0
2012-05-05 01:20:00	117.612	2012-05-05 01:20:00	5	0	0	0	0
2012-05-05 01:40:00	106.357	2012-05-05 01:40:00	6	0	0	0	0
2012-05-05 02:00:00	106.296	2012-05-05 02:00:00	7	0	0	0	0
2012-05-05 02:20:00	107.084	2012-05-05 02:20:00	8	0	0	0	0
2012-05-05 02:40:00	111.558	2012-05-05 02:40:00	9	0	0	0	0
2012-05-05 03:00:00	106.248	2012-05-05 03:00:00	10	0	0	0	0
2012-05-05 03:20:00	106.226	2012-05-05 03:20:00	11	0	0	0	0
2012-05-05 03:40:00	106.274	2012-05-05 03:40:00	12	0	0	0	0
2012-05-05 04:00:00	106.382	2012-05-05 04:00:00	13	0	0	0	0
2012-05-05 04:20:00	106.23	2012-05-05 04:20:00	14	0	0	0	0
2012-05-05 04:40:00	106.596	2012-05-05 04:40:00	15	0	0	0	0
2012-05-05 05:00:00	106.155	2012-05-05 05:00:00	16	0	0	0	0
2012-05-05 05:20:00	106.654	2012-05-05 05:20:00	17	0	0	0	0
2012-05-05 05:40:00	105.92	2012-05-05 05:40:00	18	0	0	0	0
2012-05-05 06:00:00	107.118	2012-05-05 06:00:00	19	0	0	0	0
2012-05-05 06:20:00	106.202	2012-05-05 06:20:00	20	0	0	0	0
2012-05-05 06:40:00	106.12	2012-05-05 06:40:00	21	0	0	0	0
2012-05-05 07:00:00	106.393	2012-05-05 07:00:00	22	0	0	0	0
2012-05-05 07:20:00	106.568	2012-05-05 07:20:00	23	0	0	0	0
2012-05-05 07:40:00	106.28	2012-05-05 07:40:00	24	0	0	0	0
2012-05-05 08:00:00	106.43	2012-05-05 08:00:00	25	0	0	0	0
2012-05-05 08:20:00	106.372	2012-05-05 08:20:00	26	0	0	0	0
2012-05-05 08:40:00	106.228	2012-05-05 08:40:00	27	0	0	0	0
2012-05-05 09:00:00	106.277	2012-05-05 09:00:00	28	0	0	0	0
2012-05-05 09:20:00	106.195	2012-05-05 09:20:00	29	0	0	0	0
2012-05-05 09:40:00	106.467	2012-05-05 09:40:00	30	0	0	0	0
2012-05-05 10:00:00	106.413	2012-05-05 10:00:00	31	0	0	0	0
2012-05-05 10:20:00	106.77	2012-05-05 10:20:00	32	0	0	0	0
2012-05-05 10:40:00	106.278	2012-05-05 10:40:00	33	0	0	0	0
2012-05-05 11:00:00	106.455	2012-05-05 11:00:00	34	0	0	0	0
2012-05-05 11:20:00	106.527	2012-05-05 11:20:00	35	0	0	0	0
2012-05-05 11:40:00	106.419	2012-05-05 11:40:00	36	0	0	0	0
2012-05-05 12:00:00	106.352	2012-05-05 12:00:00	37	0	0	0	0
2012-05-05 12:20:00	106.458	2012-05-05 12:20:00	38	0	0	0	0
2012-05-05 12:40:00	106.866	2012-05-05 12:40:00	39	0	0	0	0
2012-05-05 13:00:00	106.556	2012-05-05 13:00:00	40	0	0	0	0
2012-05-05 13:20:00	106.931	2012-05-05 13:20:00	41	0	0	0	0
2012-05-05 13:40:00	106.646	2012-05-05 13:40:00	42	0	0	0	0
2012-05-05 14:00:00	106.518	2012-05-05 14:00:00	43	0	0	0	0
2012-05-05 14:20:00	106.571	2012-05-05 14:20:00	44	0	0	0	0
2012-05-05 14:40:00	106.375	2012-05-05 14:40:00	45	0	0	0	0
2012-05-05 15:00:00	106.495	2012-05-05 15:00:00	46	0	0	0	0
2012-05-05 15:20:00	106.54	2012-05-05 15:20:00	47	0	0	0	0
2012-05-05 15:40:00	106.591	2012-05-05 15:40:00	48	0	0	0	0
2012-05-05 16:00:00	106.537	2012-05-05 16:00:00	49	0	0	0	0
2012-05-05 16:20:00	106.335	2012-05-05 16:20:00	50	0	0	0	0
2012-05-05 16:40:00	106.406	2012-05-05 16:40:00	51	0	0	0	0
2012-05-05 17:00:00	106.514	2012-05-05 17:00:00	52	0	0	0	0
2012-05-05 17:20:00	107.008	2012-05-05 17:20:00	53	0	0	0	0
2012-05-05 17:40:00	106.448	2012-05-05 17:40:00	54	0	0	0	0
2012-05-05 18:00:00	106.134	2012-05-05 18:00:00	55	0	0	0	0
2012-05-05 18:20:00	106.535	2012-05-05 18:20:00	56	0	0	0	0
2012-05-05 18:40:00	106.809	2012-05-05 18:40:00	57	0	0	0	0
2012-05-05 19:00:00	107.479	2012-05-05 19:00:00	58	0	0	0	0
2012-05-05 19:20:00	106.795	2012-05-05 19:20:00	59	0	0	0	0
2012-05-05 19:40:00	106.517	2012-05-05 19:40:00	60	0	0	0	0
2012-05-05 20:00:00	106.287	2012-05-05 20:00:00	61	0	0	0	0
2012-05-05 20:20:00	106.915	2012-05-05 20:20:00	62	0	0	0	0
2012-05-05 20:40:00	106.101	2012-05-05 20:40:00	63	0	0	0	0
2012-05-05 21:00:00	106.339	2012-05-05 21:00:00	64	0	0	0	0
2012-05-05 21:20:00	106.139	2012-05-05 21:20:00	65	0	0	0	0
2012-05-05 21:40:00	106.169	2012-05-05 21:40:00	66	0	0	0	0
2012-05-05 22:00:00	106.389	2012-05-05 22:00:00	67	0	0	0	0
2012-05-05 22:20:00	106.386	2012-05-05 22:20:00	68	0	0	0	0
2012-05-05 22:40:00	106.353	2012-05-05 22:40:00	69	0	0	0	0
2012-05-05 23:00:00	106.575	2012-05-05 23:00:00	70	0	0	0	0
2012-05-05 23:20:00	106.365	2012-05-05 23:20:00	71	0	0	0	0
2012-05-05 23:40:00	106.373	2012-05-05 23:40:00	72	0	0	0	0
2012-05-06	106.34	2012-05-06	1	0	0	0	0
2012-05-06 00:20:00	106.356	2012-05-06 00:20:00	2	0	0	0	0
2012-05-06 00:40:00	106.461	2012-05-06 00:40:00	3	0	0	0	0
2012-05-06 01:00:00	106.347	2012-05-06 01:00:00	4	0	0	0	0
2012-05-06 01:20:00	106.218	2012-05-06 01:20:00	5	0	0	0	0
2012-05-06 01:40:00	106.793	2012-05-06 01:40:00	6	0	0	0	0
2012-05-06 02:00:00	106.325	2012-05-06 02:00:00	7	0	0	0	0
2012-05-06 02:20:00	106.385	2012-05-06 02:20:00	8	0	0	0	0
2012-05-06 02:40:00	106.551	2012-05-06 02:40:00	9	0	0	0	0
2012-05-06 03:00:00	106.332	2012-05-06 03:00:00	10	0	0	0	0
2012-05-06 03:20:00	106.474	2012-05-06 03:20:00	11	0	0	0	0
2012-05-06 03:40:00	106.549	2012-05-06 03:40:00	12	0	0	0	0
2012-05-06 04:00:00	106.342	2012-05-06 04:00:00	13	0	0	0	0
2012-05-06 04:20:00	106.551	2012-05-06 04:20:00	14	0	0	0	0
2012-05-06 04:40:00	106.421	2012-05-06 04:40:00	15	0	0	0	0
2012-05-06 05:00:00	106.441	2012-05-06 05:00:00	16	0	0	0	0
2012-05-06 05:20:00	107.793	2012-05-06 05:20:00	17	0	0	0	0
2012-05-06 05:40:00	107.066	2012-05-06 05:40:00	18	0	0	0	0
2012-05-06 06:00:00	107.357	2012-05-06 06:00:00	19	0	0	0	0
2012-05-06 06:20:00	106.326	2012-05-06 06:20:00	20	0	0	0	0
2012-05-06 06:40:00	106.579	2012-05-06 06:40:00	21	0	0	0	0
2012-05-06 07:00:00	106.413	2012-05-06 07:00:00	22	0	0	0	0
2012-05-06 07:20:00	106.665	2012-05-06 07:20:00	23	0	0	0	0
2012-05-06 07:40:00	106.583	2012-05-06 07:40:00	24	0	0	0	0
2012-05-06 08:00:00	107.218	2012-05-06 08:00:00	25	0	0	0	0
2012-05-06 08:20:00	106.598	2012-05-06 08:20:00	26	0	0	0	0
2012-05-06 08:40:00	106.627	2012-05-06 08:40:00	27	0	0	0	0
2012-05-06 09:00:00	106.688	2012-05-06 09:00:00	28	0	0	0	0
2012-05-06 09:20:00	107.49	2012-05-06 09:20:00	29	0	0	0	0
2012-05-06 09:40:00	106.45	2012-05-06 09:40:00	30	0	0	0	0
2012-05-06 10:00:00	106.514	2012-05-06 10:00:00	31	0	0	0	0
2012-05-06 10:20:00	106.658	2012-05-06 10:20:00	32	0	0	0	0
2012-05-06 10:40:00	106.388	2012-05-06 10:40:00	33	0	0	0	0
2012-05-06 11:00:00	106.514	2012-05-06 11:00:00	34	0	0	0	0
2012-05-06 11:20:00	106.665	2012-05-06 11:20:00	35	0	0	0	0
2012-05-06 11:40:00	106.404	2012-05-06 11:40:00	36	0	0	0	0
2012-05-06 12:00:00	106.732	2012-05-06 12:00:00	37	0	0	0	0
2012-05-06 12:20:00	106.475	2012-05-06 12:20:00	38	0	0	0	0
2012-05-06 12:40:00	106.546	2012-05-06 12:40:00	39	0	0	0	0
2012-05-06 13:00:00	106.676	2012-05-06 13:00:00	40	0	0	0	0
2012-05-06 13:20:00	107.215	2012-05-06 13:20:00	41	0	0	0	0
2012-05-06 13:40:00	106.807	2012-05-06 13:40:00	42	0	0	0	0
2012-05-06 14:00:00	106.378	2012-05-06 14:00:00	43	0	0	0	0
2012-05-06 14:20:00	106.568	2012-05-06 14:20:00	44	0	0	0	0
2012-05-06 14:40:00	106.505	2012-05-06 14:40:00	45	0	0	0	0
2012-05-06 15:00:00	106.004	2012-05-06 15:00:00	46	0	0	0	0
2012-05-06 15:20:00	106.38	2012-05-06 15:20:00	47	0	0	0	0
2012-05-06 15:40:00	106.402	2012-05-06 15:40:00	48	0	0	0	0
2012-05-06 16:00:00	106.395	2012-05-06 16:00:00	49	0	0	0	0
2012-05-06 16:20:00	106.417	2012-05-06 16:20:00	50	0	0	0	0
2012-05-06 16:40:00	106.527	2012-05-06 16:40:00	51	0	0	0	0
2012-05-06 17:00:00	106.452	2012-05-06 17:00:00	52	0	0	0	0
2012-05-06 17:20:00	106.387	2012-05-06 17:20:00	53	0	0	0	0
2012-05-06 17:40:00	106.45	2012-05-06 17:40:00	54	0	0	0	0
2012-05-06 18:00:00	106.867	2012-05-06 18:00:00	55	0	0	0	0
2012-05-06 18:20:00	106.392	2012-05-06 18:20:00	56	0	0	0	0
2012-05-06 18:40:00	106.778	2012-05-06 18:40:00	57	0	0	0	0
2012-05-06 19:00:00	106.549	2012-05-06 19:00:00	58	0	0	0	0
2012-05-06 19:20:00	106.526	2012-05-06 19:20:00	59	0	0	0	0
2012-05-06 19:40:00	106.257	2012-05-06 19:40:00	60	0	0	0	0
2012-05-06 20:00:00	106.53	2012-05-06 20:00:00	61	0	0	0	0
2012-05-06 20:20:00	106.505	2012-05-06 20:20:00	62	0	0	0	0
2012-05-06 20:40:00	106.549	2012-05-06 20:40:00	63	0	0	0	0
2012-05-06 21:00:00	106.446	2012-05-06 21:00:00	64	0	0	0	0
2012-05-06 21:20:00	106.496	2012-05-06 21:20:00	65	0	0	0	0
2012-05-06 21:40:00	106.425	2012-05-06 21:40:00	66	0	0	0	0
2012-05-06 22:00:00	106.475	2012-05-06 22:00:00	67	0	0	0	0
2012-05-06 22:20:00	106.687	2012-05-06 22:20:00	68	0	0	0	0
2012-05-06 22:40:00	106.436	2012-05-06 22:40:00	69	0	0	0	0
2012-05-06 23:00:00	106.47	2012-05-06 23:00:00	70	0	0	0	0
2012-05-06 23:20:00	106.633	2012-05-06 23:20:00	71	0	0	0	0
2012-05-06 23:40:00	106.445	2012-05-06 23:40:00	72	0	0	0	0
2012-05-07	106.466	2012-05-07	1	0	0	0	0
2012-05-07 00:20:00	106.358	2012-05-07 00:20:00	2	0	0	0	0
2012-05-07 00:40:00	106.552	2012-05-07 00:40:00	3	0	0	0	0
2012-05-07 01:00:00	106.282	2012-05-07 01:00:00	4	0	0	0	0
2012-05-07 01:20:00	106.435	2012-05-07 01:20:00	5	0	0	0	0
2012-05-07 01:40:00	106.577	2012-05-07 01:40:00	6	0	0	0	0
2012-05-07 02:00:00	106.611	2012-05-07 02:00:00	7	0	0	0	0
2012-05-07 02:20:00	106.486	2012-05-07 02:20:00	8	0	0	0	0
2012-05-07 02:40:00	106.516	2012-05-07 02:40:00	9	0	0	0	0
2012-05-07 03:00:00	106.434	2012-05-07 03:00:00	10	0	0	0	0
2012-05-07 03:20:00	106.588	2012-05-07 03:20:00	11	0	0	0	0
2012-05-07 03:40:00	106.516	2012-05-07 03:40:00	12	0	0	0	0
2012-05-07 04:00:00	106.672	2012-05-07 04:00:00	13	0	0	0	0
2012-05-07 04:20:00	106.526	2012-05-07 04:20:00	14	0	0	0	0
2012-05-07 04:40:00	106.383	2012-05-07 04:40:00	15	0	0	0	0
2012-05-07 05:00:00	107.162	2012-05-07 05:00:00	16	0	0	0	0
2012-05-07 05:20:00	106.383	2012-05-07 05:20:00	17	0	0	0	0
2012-05-07 05:40:00	106.121	2012-05-07 05:40:00	18	0	0	0	0
2012-05-07 06:00:00	106.417	2012-05-07 06:00:00	19	0	0	0	0
2012-05-07 06:20:00	106.648	2012-05-07 06:20:00	20	0	0	0	0
2012-05-07 06:40:00	106.621	2012-05-07 06:40:00	21	0	0	0	0
2012-05-07 07:00:00	106.61	2012-05-07 07:00:00	22	0	0	0	0
2012-05-07 07:20:00	106.686	2012-05-07 07:20:00	23	0	0	0	0
2012-05-07 07:40:00	106.775	2012-05-07 07:40:00	24	0	0	0	0
2012-05-07 08:00:00	106.725	2012-05-07 08:00:00	25	0	0	0	0
2012-05-07 08:20:00	106.785	2012-05-07 08:20:00	26	0	0	0	0
2012-05-07 08:40:00	106.637	2012-05-07 08:40:00	27	0	0	0	0
2012-05-07 09:00:00	112.694	2012-05-07 09:00:00	28	0	0	0	0
2012-05-07 09:20:00	106.595	2012-05-07 09:20:00	29	0	0	0	0
2012-05-07 09:40:00	107.13	2012-05-07 09:40:00	30	0	0	0	0
2012-05-07 10:00:00	106.549	2012-05-07 10:00:00	31	0	0	0	0
2012-05-07 10:20:00	107.877	2012-05-07 10:20:00	32	0	0	0	0
2012-05-07 10:40:00	106.608	2012-05-07 10:40:00	33	0	0	0	0
2012-05-07 11:00:00	106.445	2012-05-07 11:00:00	34	0	0	0	0
2012-05-07 11:20:00	106.454	2012-05-07 11:20:00	35	0	0	0	0
2012-05-07 11:40:00	106.679	2012-05-07 11:40:00	36	0	0	0	0
2012-05-07 12:00:00	110.342	2012-05-07 12:00:00	37	0	0	0	0
2012-05-07 13:00:00	106.235	2012-05-07 13:00:00	40	0	0	0	0
2012-05-07 13:20:00	106.386	2012-05-07 13:20:00	41	0	0	0	0
2012-05-07 13:40:00	108.665	2012-05-07 13:40:00	42	0	0	0	0
2012-05-07 14:00:00	105.976	2012-05-07 14:00:00	43	0	0	0	0
2012-05-07 14:20:00	106.238	2012-05-07 14:20:00	44	0	0	0	0
2012-05-07 14:40:00	106.248	2012-05-07 14:40:00	45	0	0	0	0
2012-05-07 15:00:00	106.284	2012-05-07 15:00:00	46	0	0	0	0
2012-05-07 15:20:00	106.375	2012-05-07 15:20:00	47	0	0	0	0
2012-05-07 15:40:00	112.414	2012-05-07 15:40:00	48	0	0	0	0
2012-05-07 16:00:00	106.432	2012-05-07 16:00:00	49	0	0	0	0
2012-05-07 16:20:00	106.541	2012-05-07 16:20:00	50	0	0	0	0
2012-05-07 16:40:00	106.691	2012-05-07 16:40:00	51	0	0	0	0
2012-05-07 17:00:00	106.685	2012-05-07 17:00:00	52	0	0	0	0
2012-05-07 17:20:00	106.582	2012-05-07 17:20:00	53	0	0	0	0
2012-05-07 17:40:00	106.954	2012-05-07 17:40:00	54	0	0	0	0
2012-05-07 18:00:00	106.648	2012-05-07 18:00:00	55	0	0	0	0
2012-05-07 18:20:00	106.629	2012-05-07 18:20:00	56	0	0	0	0
2012-05-07 18:40:00	106.625	2012-05-07 18:40:00	57	0	0	0	0
2012-05-07 19:00:00	106.902	2012-05-07 19:00:00	58	0	0	0	0
2012-05-07 19:20:00	106.598	2012-05-07 19:20:00	59	0	0	0	0
2012-05-07 19:40:00	106.656	2012-05-07 19:40:00	60	0	0	0	0
2012-05-07 20:00:00	106.457	2012-05-07 20:00:00	61	0	0	0	0
2012-05-07 20:20:00	106.536	2012-05-07 20:20:00	62	0	0	0	0
2012-05-07 20:40:00	106.805	2012-05-07 20:40:00	63	0	0	0	0
2012-05-07 21:00:00	106.562	2012-05-07 21:00:00	64	0	0	0	0
2012-05-07 21:20:00	106.904	2012-05-07 21:20:00	65	0	0	0	0
2012-05-07 21:40:00	106.72	2012-05-07 21:40:00	66	0	0	0	0
2012-05-07 22:00:00	106.64	2012-05-07 22:00:00	67	0	0	0	0
2012-05-07 22:20:00	106.783	2012-05-07 22:20:00	68	0	0	0	0
2012-05-07 22:40:00	106.846	2012-05-07 22:40:00	69	0	0	0	0
2012-05-07 23:00:00	106.959	2012-05-07 23:00:00	70	0	0	0	0
2012-05-07 23:20:00	106.847	2012-05-07 23:20:00	71	0	0	0	0
2012-05-07 23:40:00	106.811	2012-05-07 23:40:00	72	0	0	0	0
2012-05-08	106.964	2012-05-08	1	0	0	0	0
2012-05-08 00:20:00	106.902	2012-05-08 00:20:00	2	0	0	0	0
2012-05-08 00:40:00	106.939	2012-05-08 00:40:00	3	0	0	0	0
2012-05-08 01:00:00	106.779	2012-05-08 01:00:00	4	0	0	0	0
2012-05-08 01:20:00	106.724	2012-05-08 01:20:00	5	0	0	0	0
2012-05-08 01:40:00	106.869	2012-05-08 01:40:00	6	0	0	0	0
2012-05-08 02:00:00	107.589	2012-05-08 02:00:00	7	0	0	0	0
2012-05-08 02:20:00	106.939	2012-05-08 02:20:00	8	0	0	0	0
2012-05-08 02:40:00	106.821	2012-05-08 02:40:00	9	0	0	0	0
2012-05-08 03:00:00	106.822	2012-05-08 03:00:00	10	0	0	0	0
2012-05-08 03:20:00	106.84	2012-05-08 03:20:00	11	0	0	0	0
2012-05-08 03:40:00	107.779	2012-05-08 03:40:00	12	0	0	0	0
2012-05-08 04:00:00	106.909	2012-05-08 04:00:00	13	0	0	0	0
2012-05-08 04:20:00	106.866	2012-05-08 04:20:00	14	0	0	0	0
2012-05-08 04:40:00	106.958	2012-05-08 04:40:00	15	0	0	0	0
2012-05-08 05:00:00	106.962	2012-05-08 05:00:00	16	0	0	0	0
2012-05-08 05:20:00	106.855	2012-05-08 05:20:00	17	0	0	0	0
2012-05-08 05:40:00	106.856	2012-05-08 05:40:00	18	0	0	0	0
2012-05-08 06:00:00	106.989	2012-05-08 06:00:00	19	0	0	0	0
2012-05-08 06:20:00	107.167	2012-05-08 06:20:00	20	0	0	0	0
2012-05-08 06:40:00	106.925	2012-05-08 06:40:00	21	0	0	0	0
2012-05-08 07:00:00	107.329	2012-05-08 07:00:00	22	0	0	0	0
2012-05-08 07:20:00	106.88	2012-05-08 07:20:00	23	0	0	0	0
2012-05-08 07:40:00	106.894	2012-05-08 07:40:00	24	0	0	0	0
2012-05-08 08:00:00	106.938	2012-05-08 08:00:00	25	0	0	0	0
2012-05-08 08:20:00	106.944	2012-05-08 08:20:00	26	0	0	0	0
2012-05-08 08:40:00	106.931	2012-05-08 08:40:00	27	0	0	0	0
2012-05-08 09:00:00	106.533	2012-05-08 09:00:00	28	0	0	0	0
2012-05-08 09:20:00	106.734	2012-05-08 09:20:00	29	0	0	0	0
2012-05-08 09:40:00	106.622	2012-05-08 09:40:00	30	0	0	0	0
2012-05-08 10:00:00	108.261	2012-05-08 10:00:00	31	0	0	0	0
2012-05-08 10:20:00	110.833	2012-05-08 10:20:00	32	0	0	0	0
2012-05-08 10:40:00	106.519	2012-05-08 10:40:00	33	0	0	0	0
2012-05-08 11:00:00	117.195	2012-05-08 11:00:00	34	0	0	0	0
2012-05-08 11:20:00	106.721	2012-05-08 11:20:00	35	0	0	0	0
2012-05-08 11:40:00	106.503	2012-05-08 11:40:00	36	0	0	0	0
2012-05-08 12:00:00	106.723	2012-05-08 12:00:00	37	0	0	0	0
2012-05-08 12:20:00	106.682	2012-05-08 12:20:00	38	0	0	0	0
2012-05-08 12:40:00	106.819	2012-05-08 12:40:00	39	0	0	0	0
2012-05-08 13:00:00	106.907	2012-05-08 13:00:00	40	0	0	0	0
2012-05-08 13:20:00	106.642	2012-05-08 13:20:00	41	0	0	0	0
2012-05-08 13:40:00	106.919	2012-05-08 13:40:00	42	0	0	0	0
2012-05-08 14:00:00	106.595	2012-05-08 14:00:00	43	0	0	0	0
2012-05-08 14:20:00	106.903	2012-05-08 14:20:00	44	0	0	0	0
2012-05-08 14:40:00	106.847	2012-05-08 14:40:00	45	0	0	0	0
2012-05-08 15:00:00	106.68	2012-05-08 15:00:00	46	0	0	0	0
2012-05-08 15:20:00	106.909	2012-05-08 15:20:00	47	0	0	0	0
2012-05-08 15:40:00	106.684	2012-05-08 15:40:00	48	0	0	0	0
2012-05-08 16:00:00	106.683	2012-05-08 16:00:00	49	0	0	0	0
2012-05-08 16:20:00	106.676	2012-05-08 16:20:00	50	0	0	0	0
2012-05-08 16:40:00	106.806	2012-05-08 16:40:00	51	0	0	0	0
2012-05-08 17:00:00	106.669	2012-05-08 17:00:00	52	0	0	0	0
2012-05-08 17:20:00	106.712	2012-05-08 17:20:00	53	0	0	0	0
2012-05-08 17:40:00	106.625	2012-05-08 17:40:00	54	0	0	0	0
2012-05-08 18:00:00	106.635	2012-05-08 18:00:00	55	0	0	0	0
2012-05-08 18:20:00	120.105	2012-05-08 18:20:00	56	0	0	0	0
2012-05-08 18:40:00	106.583	2012-05-08 18:40:00	57	0	0	0	0
2012-05-08 19:00:00	107.677	2012-05-08 19:00:00	58	0	0	0	0
2012-05-08 19:20:00	106.976	2012-05-08 19:20:00	59	0	0	0	0
2012-05-08 19:40:00	106.747	2012-05-08 19:40:00	60	0	0	0	0
2012-05-08 20:00:00	106.65	2012-05-08 20:00:00	61	0	0	0	0
2012-05-08 20:20:00	106.8	2012-05-08 20:20:00	62	0	0	0	0
2012-05-08 20:40:00	106.635	2012-05-08 20:40:00	63	0	0	0	0
2012-05-08 21:00:00	106.599	2012-05-08 21:00:00	64	0	0	0	0
2012-05-08 21:20:00	106.573	2012-05-08 21:20:00	65	0	0	0	0
2012-05-08 21:40:00	106.682	2012-05-08 21:40:00	66	0	0	0	0
2012-05-08 22:00:00	106.47	2012-05-08 22:00:00	67	0	0	0	0
2012-05-08 22:20:00	106.651	2012-05-08 22:20:00	68	0	0	0	0
2012-05-08 22:40:00	106.716	2012-05-08 22:40:00	69	0	0	0	0
2012-05-08 23:00:00	106.606	2012-05-08 23:00:00	70	0	0	0	0
2012-05-08 23:20:00	106.648	2012-05-08 23:20:00	71	0	0	0	0
2012-05-08 23:40:00	106.577	2012-05-08 23:40:00	72	0	0	0	0
2012-05-09	106.606	2012-05-09	1	0	0	0	0
2012-05-09 00:20:00	106.945	2012-05-09 00:20:00	2	0	0	0	0
2012-05-09 00:40:00	106.541	2012-05-09 00:40:00	3	0	0	0	0
2012-05-09 01:00:00	106.578	2012-05-09 01:00:00	4	0	0	0	0
2012-05-09 01:20:00	106.451	2012-05-09 01:20:00	5	0	0	0	0
2012-05-09 01:40:00	106.597	2012-05-09 01:40:00	6	0	0	0	0
2012-05-09 02:00:00	106.63	2012-05-09 02:00:00	7	0	0	0	0
2012-05-09 02:20:00	106.558	2012-05-09 02:20:00	8	0	0	0	0
2012-05-09 02:40:00	106.602	2012-05-09 02:40:00	9	0	0	0	0
2012-05-09 03:00:00	106.601	2012-05-09 03:00:00	10	0	0	0	0
2012-05-09 03:20:00	106.679	2012-05-09 03:20:00	11	0	0	0	0
2012-05-09 03:40:00	106.764	2012-05-09 03:40:00	12	0	0	0	0
2012-05-09 04:00:00	106.764	2012-05-09 04:00:00	13	0	0	0	0
2012-05-09 04:20:00	106.734	2012-05-09 04:20:00	14	0	0	0	0
2012-05-09 04:40:00	106.65	2012-05-09 04:40:00	15	0	0	0	0
2012-05-09 05:00:00	106.604	2012-05-09 05:00:00	16	0	0	0	0
2012-05-09 05:20:00	106.572	2012-05-09 05:20:00	17	0	0	0	0
2012-05-09 05:40:00	106.468	2012-05-09 05:40:00	18	0	0	0	0
2012-05-09 06:00:00	106.634	2012-05-09 06:00:00	19	0	0	0	0
2012-05-09 06:20:00	114.488	2012-05-09 06:20:00	20	0	0	0	0
2012-05-09 06:40:00	107.055	2012-05-09 06:40:00	21	0	0	0	0
2012-05-09 07:00:00	106.813	2012-05-09 07:00:00	22	0	0	0	0
2012-05-09 07:20:00	106.714	2012-05-09 07:20:00	23	0	0	0	0
2012-05-09 07:40:00	106.929	2012-05-09 07:40:00	24	0	0	0	0
2012-05-09 08:00:00	106.728	2012-05-09 08:00:00	25	0	0	0	0
2012-05-09 08:20:00	106.785	2012-05-09 08:20:00	26	0	0	0	0
2012-05-09 08:40:00	106.642	2012-05-09 08:40:00	27	0	0	0	0
2012-05-09 09:00:00	106.671	2012-05-09 09:00:00	28	0	0	0	0
2012-05-09 09:20:00	106.827	2012-05-09 09:20:00	29	0	0	0	0
2012-05-09 09:40:00	106.707	2012-05-09 09:40:00	30	0	0	0	0
2012-05-09 10:00:00	106.754	2012-05-09 10:00:00	31	0	0	0	0
2012-05-09 10:20:00	106.882	2012-05-09 10:20:00	32	0	0	0	0
2012-05-09 10:40:00	106.82	2012-05-09 10:40:00	33	0	0	0	0
2012-05-09 11:00:00	107.051	2012-05-09 11:00:00	34	0	0	0	0
2012-05-09 11:20:00	106.821	2012-05-09 11:20:00	35	0	0	0	0
2012-05-09 11:40:00	117.083	2012-05-09 11:40:00	36	0	0	0	0
2012-05-09 12:00:00	106.854	2012-05-09 12:00:00	37	0	0	0	0
2012-05-09 12:20:00	106.939	2012-05-09 12:20:00	38	0	0	0	0
2012-05-09 12:40:00	106.78	2012-05-09 12:40:00	39	0	0	0	0
2012-05-09 13:00:00	110.771	2012-05-09 13:00:00	40	0	0	0	0
2012-05-09 13:20:00	106.782	2012-05-09 13:20:00	41	0	0	0	0
2012-05-09 13:40:00	106.869	2012-05-09 13:40:00	42	0	0	0	0
2012-05-09 14:00:00	106.696	2012-05-09 14:00:00	43	0	0	0	0
2012-05-09 14:20:00	106.878	2012-05-09 14:20:00	44	0	0	0	0
2012-05-09 14:40:00	106.902	2012-05-09 14:40:00	45	0	0	0	0
2012-05-09 15:00:00	106.906	2012-05-09 15:00:00	46	0	0	0	0
2012-05-09 15:20:00	107.053	2012-05-09 15:20:00	47	0	0	0	0
2012-05-09 15:40:00	110.112	2012-05-09 15:40:00	48	0	0	0	0
2012-05-09 16:00:00	106.629	2012-05-09 16:00:00	49	0	0	0	0
2012-05-09 16:20:00	106.929	2012-05-09 16:20:00	50	0	0	0	0
2012-05-09 16:40:00	106.833	2012-05-09 16:40:00	51	0	0	0	0
2012-05-09 17:00:00	107.026	2012-05-09 17:00:00	52	0	0	0	0
2012-05-09 17:20:00	106.84	2012-05-09 17:20:00	53	0	0	0	0
2012-05-09 17:40:00	106.819	2012-05-09 17:40:00	54	0	0	0	0
2012-05-09 18:00:00	107.047	2012-05-09 18:00:00	55	0	0	0	0
2012-05-09 18:20:00	106.911	2012-05-09 18:20:00	56	0	0	0	0
2012-05-09 18:40:00	106.986	2012-05-09 18:40:00	57	0	0	0	0
2012-05-09 19:00:00	107.338	2012-05-09 19:00:00	58	0	0	0	0
2012-05-09 19:20:00	106.942	2012-05-09 19:20:00	59	0	0	0	0
2012-05-09 19:40:00	106.825	2012-05-09 19:40:00	60	0	0	0	0
2012-05-09 20:00:00	106.811	2012-05-09 20:00:00	61	0	0	0	0
2012-05-09 20:20:00	106.708	2012-05-09 20:20:00	62	0	0	0	0
2012-05-09 20:40:00	106.911	2012-05-09 20:40:00	63	0	0	0	0
2012-05-09 21:00:00	107.031	2012-05-09 21:00:00	64	0	0	0	0
2012-05-09 21:20:00	106.914	2012-05-09 21:20:00	65	0	0	0	0
2012-05-09 21:40:00	107.008	2012-05-09 21:40:00	66	0	0	0	0
2012-05-09 22:00:00	107.144	2012-05-09 22:00:00	67	0	0	0	0
2012-05-09 22:20:00	106.935	2012-05-09 22:20:00	68	0	0	0	0
2012-05-09 22:40:00	106.991	2012-05-09 22:40:00	69	0	0	0	0
2012-05-09 23:00:00	107.228	2012-05-09 23:00:00	70	0	0	0	0
2012-05-09 23:20:00	106.86	2012-05-09 23:20:00	71	0	0	0	0
2012-05-09 23:40:00	106.962	2012-05-09 23:40:00	72	0	0	0	0
2012-05-10	106.945	2012-05-10	1	0	0	0	0
2012-05-10 00:20:00	107.053	2012-05-10 00:20:00	2	0	0	0	0
2012-05-10 00:40:00	106.865	2012-05-10 00:40:00	3	0	0	0	0
2012-05-10 01:00:00	106.822	2012-05-10 01:00:00	4	0	0	0	0
2012-05-10 01:20:00	107.064	2012-05-10 01:20:00	5	0	0	0	0
2012-05-10 01:40:00	106.942	2012-05-10 01:40:00	6	0	0	0	0
2012-05-10 02:00:00	106.898	2012-05-10 02:00:00	7	0	0	0	0
2012-05-10 02:20:00	107.06	2012-05-10 02:20:00	8	0	0	0	0
2012-05-10 02:40:00	106.889	2012-05-10 02:40:00	9	0	0	0	0
2012-05-10 03:00:00	107.043	2012-05-10 03:00:00	10	0	0	0	0
2012-05-10 03:20:00	106.966	2012-05-10 03:20:00	11	0	0	0	0
2012-05-10 03:40:00	107.103	2012-05-10 03:40:00	12	0	0	0	0
2012-05-10 04:00:00	107.035	2012-05-10 04:00:00	13	0	0	0	0
2012-05-10 04:20:00	107.194	2012-05-10 04:20:00	14	0	0	0	0
2012-05-10 04:40:00	107.242	2012-05-10 04:40:00	15	0	0	0	0
2012-05-10 05:00:00	107.038	2012-05-10 05:00:00	16	0	0	0	0
2012-05-10 05:20:00	106.89	2012-05-10 05:20:00	17	0	0	0	0
2012-05-10 05:40:00	107.045	2012-05-10 05:40:00	18	0	0	0	0
2012-05-10 06:00:00	107.318	2012-05-10 06:00:00	19	0	0	0	0
2012-05-10 06:20:00	107.602	2012-05-10 06:20:00	20	0	0	0	0
2012-05-10 06:40:00	107.808	2012-05-10 06:40:00	21	0	0	0	0
2012-05-10 07:00:00	107.237	2012-05-10 07:00:00	22	0	0	0	0
2012-05-10 07:20:00	106.598	2012-05-10 07:20:00	23	0	0	0	0
2012-05-10 07:40:00	106.78	2012-05-10 07:40:00	24	0	0	0	0
2012-05-10 08:00:00	106.519	2012-05-10 08:00:00	25	0	0	0	0
2012-05-10 08:20:00	106.675	2012-05-10 08:20:00	26	0	0	0	0
2012-05-10 08:40:00	106.639	2012-05-10 08:40:00	27	0	0	0	0
2012-05-10 09:00:00	106.704	2012-05-10 09:00:00	28	0	0	0	0
2012-05-10 09:20:00	106.692	2012-05-10 09:20:00	29	0	0	0	0
2012-05-10 09:40:00	106.75	2012-05-10 09:40:00	30	0	0	0	0
2012-05-10 10:00:00	106.573	2012-05-10 10:00:00	31	0	0	0	0
2012-05-10 10:20:00	106.606	2012-05-10 10:20:00	32	0	0	0	0
2012-05-10 10:40:00	106.687	2012-05-10 10:40:00	33	0	0	0	0
2012-05-10 11:00:00	106.728	2012-05-10 11:00:00	34	0	0	0	0
2012-05-10 11:20:00	106.555	2012-05-10 11:20:00	35	0	0	0	0
2012-05-10 11:40:00	106.78	2012-05-10 11:40:00	36	0	0	0	0
2012-05-10 12:00:00	106.765	2012-05-10 12:00:00	37	0	0	0	0
2012-05-10 12:20:00	110.565	2012-05-10 12:20:00	38	0	0	0	0
2012-05-10 12:40:00	106.804	2012-05-10 12:40:00	39	0	0	0	0
2012-05-10 13:00:00	106.708	2012-05-10 13:00:00	40	0	0	0	0
2012-05-10 13:20:00	106.795	2012-05-10 13:20:00	41	0	0	0	0
2012-05-10 13:40:00	107.845	2012-05-10 13:40:00	42	0	0	0	0
2012-05-10 14:00:00	111.507	2012-05-10 14:00:00	43	0	0	0	0
2012-05-10 14:20:00	107.013	2012-05-10 14:20:00	44	0	0	0	0
2012-05-10 14:40:00	117.09	2012-05-10 14:40:00	45	0	0	0	0
2012-05-10 15:00:00	106.805	2012-05-10 15:00:00	46	0	0	0	0
2012-05-10 15:20:00	106.81	2012-05-10 15:20:00	47	0	0	0	0
2012-05-10 15:40:00	106.866	2012-05-10 15:40:00	48	0	0	0	0
2012-05-10 16:00:00	106.877	2012-05-10 16:00:00	49	0	0	0	0
2012-05-10 16:20:00	106.946	2012-05-10 16:20:00	50	0	0	0	0
2012-05-10 16:40:00	106.993	2012-05-10 16:40:00	51	0	0	0	0
2012-05-10 17:00:00	106.893	2012-05-10 17:00:00	52	0	0	0	0
2012-05-10 17:20:00	107.064	2012-05-10 17:20:00	53	0	0	0	0
2012-05-10 17:40:00	106.91	2012-05-10 17:40:00	54	0	0	0	0
2012-05-10 18:00:00	106.847	2012-05-10 18:00:00	55	0	0	0	0
2012-05-10 18:20:00	106.908	2012-05-10 18:20:00	56	0	0	0	0
2012-05-10 18:40:00	106.814	2012-05-10 18:40:00	57	0	0	0	0
2012-05-10 19:00:00	107.551	2012-05-10 19:00:00	58	0	0	0	0
2012-05-10 19:20:00	107.242	2012-05-10 19:20:00	59	0	0	0	0
2012-05-10 19:40:00	107.208	2012-05-10 19:40:00	60	0	0	0	0
2012-05-10 20:00:00	107.154	2012-05-10 20:00:00	61	0	0	0	0
2012-05-10 20:20:00	106.999	2012-05-10 20:20:00	62	0	0	0	0
2012-05-10 20:40:00	107.476	2012-05-10 20:40:00	63	0	0	0	0
2012-05-10 21:00:00	107.408	2012-05-10 21:00:00	64	0	0	0	0
2012-05-10 21:20:00	107.412	2012-05-10 21:20:00	65	0	0	0	0
2012-05-10 21:40:00	107.553	2012-05-10 21:40:00	66	0	0	0	0
2012-05-10 22:00:00	107.486	2012-05-10 22:00:00	67	0	0	0	0
2012-05-10 22:20:00	107.372	2012-05-10 22:20:00	68	0	0	0	0
2012-05-10 22:40:00	107.31	2012-05-10 22:40:00	69	0	0	0	0
2012-05-10 23:00:00	107.669	2012-05-10 23:00:00	70	0	0	0	0
2012-05-10 23:20:00	107.408	2012-05-10 23:20:00	71	0	0	0	0
2012-05-10 23:40:00	107.481	2012-05-10 23:40:00	72	0	0	0	0
2012-05-11	107.377	2012-05-11	1	0	0	0	0
2012-05-11 00:20:00	107.418	2012-05-11 00:20:00	2	0	0	0	0
2012-05-11 00:40:00	107.512	2012-05-11 00:40:00	3	0	0	0	0
2012-05-11 01:00:00	107.428	2012-05-11 01:00:00	4	0	0	0	0
2012-05-11 01:20:00	107.46	2012-05-11 01:20:00	5	0	0	0	0
2012-05-11 01:40:00	107.3	2012-05-11 01:40:00	6	0	0	0	0
2012-05-11 02:00:00	107.512	2012-05-11 02:00:00	7	0	0	0	0
2012-05-11 02:20:00	107.595	2012-05-11 02:20:00	8	0	0	0	0
2012-05-11 02:40:00	107.907	2012-05-11 02:40:00	9	0	0	0	0
2012-05-11 03:00:00	107.463	2012-05-11 03:00:00	10	0	0	0	0
2012-05-11 03:20:00	107.517	2012-05-11 03:20:00	11	0	0	0	0
2012-05-11 03:40:00	107.453	2012-05-11 03:40:00	12	0	0	0	0
2012-05-11 04:00:00	107.704	2012-05-11 04:00:00	13	0	0	0	0
2012-05-11 04:20:00	107.535	2012-05-11 04:20:00	14	0	0	0	0
2012-05-11 04:40:00	107.501	2012-05-11 04:40:00	15	0	0	0	0
2012-05-11 05:00:00	107.41	2012-05-11 05:00:00	16	0	0	0	0
2012-05-11 05:20:00	107.275	2012-05-11 05:20:00	17	0	0	0	0
2012-05-11 05:40:00	108.458	2012-05-11 05:40:00	18	0	0	0	0
2012-05-11 06:00:00	107.483	2012-05-11 06:00:00	19	0	0	0	0
2012-05-11 06:20:00	107.33	2012-05-11 06:20:00	20	0	0	0	0
2012-05-11 06:40:00	107.628	2012-05-11 06:40:00	21	0	0	0	0
2012-05-11 07:00:00	107.616	2012-05-11 07:00:00	22	0	0	0	0
2012-05-11 07:20:00	107.466	2012-05-11 07:20:00	23	0	0	0	0
2012-05-11 07:40:00	107.485	2012-05-11 07:40:00	24	0	0	0	0
2012-05-11 08:00:00	107.347	2012-05-11 08:00:00	25	0	0	0	0
2012-05-11 08:20:00	107.445	2012-05-11 08:20:00	26	0	0	0	0
2012-05-11 08:40:00	107.289	2012-05-11 08:40:00	27	0	0	0	0
2012-05-11 09:00:00	107.444	2012-05-11 09:00:00	28	0	0	0	0
2012-05-11 09:20:00	107.163	2012-05-11 09:20:00	29	0	0	0	0
2012-05-11 09:40:00	107.486	2012-05-11 09:40:00	30	0	0	0	0
2012-05-11 10:00:00	107.669	2012-05-11 10:00:00	31	0	0	0	0
2012-05-11 10:20:00	107.327	2012-05-11 10:20:00	32	0	0	0	0
2012-05-11 10:40:00	109.046	2012-05-11 10:40:00	33	0	0	0	0
2012-05-11 11:00:00	116.265	2012-05-11 11:00:00	34	0	0	0	0
2012-05-11 11:20:00	107.461	2012-05-11 11:20:00	35	0	0	0	0
2012-05-11 11:40:00	107.308	2012-05-11 11:40:00	36	0	0	0	0
2012-05-11 12:00:00	106.984	2012-05-11 12:00:00	37	0	0	0	0
[truncated: 13,934 more rows]
