# Supplementary material for: Acoustic monitoring indicates a correlation between calling and spawning in captive spotted seatrout (Cynoscion nebulosus)
Source: PeerJ. 2017 Feb 9;5:e2944. doi: 10.7717/peerj.2944 (PMC5345829; doi:10.7717/peerj.2944)
Supplement: Data S6 [file peerj-05-2944-s006.xls]

## Sheet: Tank1_NWL 2_1072
Date & Time	HTempData	DO (mg/L)	DO (%)	Cond (mS/cm)	Sal (ppt)
2012-04-13	22.8
2012-04-14	22.7
2012-04-15	22.8
2012-04-16	22.9
2012-04-17	23.7
2012-04-18	23.8
2012-04-19	23.9
2012-04-20	23.8
2012-04-21	23.7
2012-04-22	23.9
2012-04-23	23.9
2012-04-24	24.8
2012-04-25	24.6
2012-04-26	24.8
2012-04-27	24.8
2012-04-28	24.6
2012-04-29	24.6
2012-04-30	24.8
2012-05-01	25.7
2012-05-02	25.7
2012-05-03	25.8
2012-05-04	25.8
2012-05-05	25.9
2012-05-06	25.7
2012-05-07	25.8
2012-05-08	25.8
2012-05-09	25.8
2012-05-10	25.9
2012-05-11	25.5
2012-05-12	25.9
2012-05-13	25.8
2012-05-14	25.7
2012-05-15	27.8
2012-05-16 09:34:46	27.7445	5.05	77.1	52.9	33
2012-05-16 10:34:46	27.8	5.08	77.6	53	33
2012-05-16 11:34:46	27.8555	5.03	76.9	53	33
2012-05-16 12:34:46	26.912	4.45	67.2	53.2	33.3
2012-05-16 13:34:46	27.3005	4.99	75.8	53.2	33.6
2012-05-16 14:34:46	27.578	5.02	76.5	53.2	33
2012-05-16 16:34:46	27.8555	5.04	77.1	53.3	33.2
2012-05-16 17:34:46	27.7445	4.97	76	53.2	33.2
2012-05-16 18:34:46	27.7445	4.79	73.2	53.1	33.1
2012-05-16 19:34:46	27.911	4.86	74.5	53.2	33.2
2012-05-16 20:34:46	27.8	4.97	76.2	53.1	33.2
2012-05-16 21:34:46	27.689	4.91	74.9	53.2	33.1
2012-05-16 22:34:46	27.8555	4.94	75.6	53.3	33.2
2012-05-16 23:34:46	27.8555	4.89	74.9	53.3	33.2
2012-05-17 00:34:46	27.8	4.96	75.8	53.2	33.2
2012-05-17 01:34:46	27.6335	4.94	75.3	53.2	33.2
2012-05-17 02:34:46	27.8555	4.94	75.6	53.3	33.2
2012-05-17 03:34:46	27.911	4.93	75.6	53.2	33.2
2012-05-17 04:34:46	27.689	4.95	75.6	53.5	33.1
2012-05-17 05:34:46	27.911	4.97	76.2	53.3	33.2
2012-05-17 06:34:46	27.7445	4.79	73.4	53.2	33.2
2012-05-17 07:34:46	27.689	4.93	75.4	53.3	33.2
2012-05-17 09:34:46	27.7445	4.96	76	53.3	33.2
2012-05-17 10:34:46	27.8	4.97	76	53.3	33.2
2012-05-17 11:34:46	27.578	5.07	77.3	53.2	33.1
2012-05-17 12:34:46	27.911	4.91	75.3	53.2	33.2
2012-05-17 15:34:46	27.8555	4.76	72.9	53.3	33.2
2012-05-17 16:34:46	27.689	4.74	72.5	53.3	33.2
2012-05-17 17:34:46	27.8555	4.81	73.6	53.3	33.2
2012-05-17 18:34:46	27.8555	4.52	69.2	53.3	33.2
2012-05-17 19:34:46	27.689	4.51	68.9	53.3	33.2
2012-05-17 20:34:46	27.6335	4.61	70.3	53.2	33.1
2012-05-17 21:34:46	27.8	4.57	69.9	53.3	33.2
2012-05-17 22:34:46	27.8	4.73	72.3	53.3	33.2
2012-05-18 00:34:46	27.7445	4.76	72.7	53.3	33.2
2012-05-18 01:34:46	27.8	4.64	71	53.3	33.2
2012-05-18 02:34:46	27.8	4.65	71.2	53.3	33.2
2012-05-18 03:34:46	27.8	4.71	72	53.2	33.2
2012-05-18 04:34:46	27.8555	4.7	72	53.2	33.2
2012-05-18 05:34:46	27.7445	4.66	71.2	53.5	33.2
2012-05-18 06:34:46	27.8	4.75	72.7	53.3	33.2
2012-05-18 07:34:46	27.8555	4.71	72.1	53.3	33.2
2012-05-18 09:34:46	27.8	4.56	69.8	53.3	33.2
2012-05-18 10:34:46	27.911	4.59	70.3	53.3	33.2
2012-05-18 12:34:46	27.8	4.62	70.7	53.5	33.2
2012-05-18 13:34:46	27.911	4.63	71	53.3	33.2
2012-05-18 15:34:46	27.8555	4.71	72.1	53.2	33.3
2012-05-18 16:34:46	27.8555	4.64	71	53.5	33.3
2012-05-18 17:34:46	27.7445	4.66	71.2	53.5	33.2
2012-05-18 18:34:46	27.911	4.62	70.7	53.5	33.3
2012-05-18 19:34:46	27.8	4.67	71.4	53.3	33.2
2012-05-18 20:34:46	27.8	4.66	71.2	53.5	33.2
2012-05-18 21:34:46	27.8	4.76	72.9	53.5	33.3
2012-05-18 22:34:46	27.8555	4.72	72.3	53.3	33.3
2012-05-18 23:34:46	27.689	4.72	72.1	53.5	33.2
2012-05-19 00:34:46	27.911	4.7	72.1	53.3	33.3
2012-05-19 01:34:46	27.8	4.67	71.4	53.5	33.2
2012-05-19 04:34:46	27.8555	4.71	72.1	53.3	33.2
2012-05-19 05:34:46	27.7445	4.7	71.8	53.3	33.2
2012-05-19 07:34:46	27.7445	4.6	70.3	53.5	33.2
2012-05-19 08:34:46	27.8	4.55	69.6	53.5	33.3
2012-05-19 09:34:46	27.8	4.56	69.9	53.5	33.3
2012-05-19 10:34:46	27.7445	4.51	68.9	53.5	33.2
2012-05-19 11:34:46	27.8555	4.51	69	53.5	33.3
2012-05-19 12:34:46	27.8	4.44	67.9	53.3	33.3
2012-05-19 14:34:46	27.911	4.53	69.4	53.3	33.3
2012-05-19 15:34:46	27.8	4.43	67.8	53.5	33.3
2012-05-19 16:34:46	27.8	4.51	68.9	53.5	33.2
2012-05-19 17:34:46	27.8	4.62	70.7	53.5	33.3
2012-05-19 18:34:46	27.8555	4.56	69.9	53.5	33.3
2012-05-19 19:34:46	27.7445	4.67	71.4	53.5	33.2
2012-05-19 21:34:46	27.911	4.74	72.7	53.5	33.3
2012-05-19 22:34:46	27.7445	4.8	73.4	53.5	33.3
2012-05-19 23:34:46	27.8	4.82	73.8	53.3	33.3
2012-05-20 00:34:46	27.8555	4.8	73.6	53.6	33.3
2012-05-20 01:34:46	27.7445	4.86	74.3	53.6	33.2
2012-05-20 02:34:46	27.911	4.8	73.6	53.5	33.4
2012-05-20 03:34:46	27.8	4.81	73.6	53.5	33.3
2012-05-20 05:34:46	27.911	4.88	74.9	53.6	33.4
2012-05-20 06:34:46	27.8	4.61	70.5	53.5	33.3
2012-05-20 07:34:46	27.578	4.83	73.6	53.5	33.2
2012-05-20 10:34:46	27.689	4.89	74.7	53.6	33.2
2012-05-20 11:34:46	27.8555	5.08	77.8	53.6	33.4
2012-05-20 12:34:46	27.689	4.93	75.3	53.6	33.3
2012-05-20 13:34:46	27.911	4.82	74	53.7	33.4
2012-05-20 14:34:46	27.134	3.42	47.1	28.1	16.5
2012-05-20 15:34:46	22.6385	5.57	77.6	52.2	32.3
2012-05-20 17:34:46	23.693	5.31	75.4	52.2	32.3
2012-05-20 18:34:46	24.026	5.24	74.9	52.3	32.5
2012-05-20 19:34:46	24.359	5.2	75.1	52.3	33.1
2012-05-20 20:34:46	24.803	5.05	73.1	52.3	32.5
2012-05-20 23:34:46	25.8575	4.94	72.9	52.4	32.5
2012-05-21 00:34:46	26.246	4.77	70.9	52.4	32.7
2012-05-21 01:34:46	26.468	4.76	71	52.4	32.3
2012-05-21 02:34:46	26.801	4.78	71.6	52.4	32.4
2012-05-21 03:34:46	27.0785	4.8	72.5	52.3	33
2012-05-21 04:34:46	27.245	4.93	74.7	52.4	33.1
2012-05-21 05:34:46	27.578	4.97	75.4	52.4	32.5
2012-05-21 06:34:46	27.911	4.82	73.6	52.5	32.7
2012-05-21 07:34:46	27.8555	4.82	73.6	52.4	32.7
2012-05-21 08:34:46	27.8	4.86	74.2	52.4	32.7
2012-05-21 09:34:46	27.689	4.99	76	52.4	32.6
2012-05-21 10:34:46	27.911	4.86	74.3	52.4	32.7
2012-05-21 12:34:46	27.689	4.91	74.7	52.4	32.6
2012-05-21 13:34:46	27.911	4.89	74.7	52.5	32.7
2012-05-21 15:34:46	27.7445	4.84	73.8	52.5	32.7
2012-05-21 16:34:46	27.7445	4.82	73.4	52.5	32.7
2012-05-21 17:34:46	27.8555	4.83	73.8	52.5	32.7
2012-05-21 19:34:46	27.6335	4.79	72.9	52.6	32.6
2012-05-21 20:34:46	27.8555	4.82	73.6	52.5	32.7
2012-05-21 21:34:46	27.8555	4.82	73.6	52.5	32.7
2012-05-21 22:34:46	27.8	4.83	73.6	52.4	32.7
2012-05-21 23:34:46	27.8	4.92	75.1	52.5	32.7
2012-05-22 00:34:46	27.911	4.99	76.2	52.4	32.7
2012-05-22 01:34:46	27.8	4.83	73.6	52.5	32.7
2012-05-22 02:34:46	27.7445	5.03	76.7	52.5	32.7
2012-05-22 03:34:46	27.8555	4.96	75.8	52.5	32.7
2012-05-22 04:34:46	27.8555	4.94	75.3	52.5	32.7
2012-05-22 05:34:46	27.7445	4.86	74	52.5	32.7
2012-05-22 06:34:46	27.7445	4.65	71	52.4	32.7
2012-05-22 07:34:46	27.8555	4.64	70.9	52.4	32.7
2012-05-22 08:34:46	27.7445	4.71	71.8	52.5	32.7
2012-05-22 09:34:46	27.7445	4.91	74.7	52.4	32.7
2012-05-23	27.7
2012-05-24	27.9
2012-05-25	27.7
2012-05-26	27.7
2012-05-27	27.5
2012-05-28	27.8
2012-05-29	27.7
2012-05-30	27.8
2012-05-31	27.7
2012-06-01	27.9
2012-06-02	27.8
2012-06-03	27.8
2012-06-04	27.9
2012-06-05	27.7
2012-06-06	27.9
2012-06-07	27.8
2012-06-08	27.8
2012-06-09	27.8
2012-06-10	27.7
2012-06-11	27.9
2012-06-12	27.8
2012-06-13	27.8
2012-06-14	27.7
2012-06-15
2012-06-16	27.7
2012-06-17	27.8
2012-06-18	27.7
2012-06-19	27.8
2012-06-20	27.8
2012-06-21	27.7
2012-06-22	27.9
2012-06-23	27.6
2012-06-24	27.7
2012-06-25	27.7
2012-06-26	27.9
2012-06-27	27.7
2012-06-28	27.9
2012-06-29	27.7
2012-06-30
2012-07-01	27.8
2012-07-02	27.7
2012-07-03	27.8
2012-07-04	28.1
2012-07-05	27.7
2012-07-06	24.3					Set temps to 25 C
2012-07-07	26.2					Temp probe bad (handheld reading)
2012-07-08	29.2
2012-07-09	28.2
2012-07-10	25.8
2012-07-11	26.2
2012-07-12	25.8
2012-07-13	25.4
2012-07-14	24.8
2012-07-15	24.4
2012-07-16	24.2
2012-07-17	24.2
2012-07-18	24.6
2012-07-19	24.2
2012-07-20	27.7
2012-07-21	27.8
2012-07-22	27.8
2012-07-23	27.7
2012-07-24	27.6
2012-07-25 09:41:37	27.75	5.27	80.4	51.8	32.8
2012-07-25 10:41:37	27.8055	5.34	81.6	51.8	32.7
2012-07-25 11:41:37	27.6945	5.24	79.8	51.6	32.7
2012-07-25 12:41:37	27.75	5.09	77.7	51.7	32.7
2012-07-25 13:41:37	27.9165	4.94	75.6	51.5	32.9
2012-07-25 14:41:37	27.75	5.02	76.8	51.7	32.9
2012-07-25 15:41:37	27.8055	5	76.5	51.7	32.9
2012-07-25 16:41:37	27.9165	5.02	76.8	51.6	32.9
2012-07-25 17:41:37	27.861	5.06	77.4	51.6	32.8
2012-07-25 18:41:37	27.8055	4.95	75.6	51.5	32.9
2012-07-25 19:41:37	27.9165	5.07	77.7	51.8	32.9
2012-07-25 20:41:37	27.8055	5.09	77.7	51.8	32.9
2012-07-25 21:41:37	27.8055	5.06	77.4	51.5	32.8
2012-07-25 22:41:37	27.639	4.95	75.6	51.8	32.9
2012-07-25 23:41:37	27.639	5.03	76.8	51.8	32.9
2012-07-26 00:41:37	27.75	5.19	79.2	51.8	32.9
2012-07-26 01:41:37	27.6945	5.04	76.8	51.8	32.8
2012-07-26 02:41:37	27.6945	5.02	76.5	51.7	32.7
2012-07-26 03:41:37	27.75	5.02	76.5	51.8	32.7
2012-07-26 04:41:37	27.639	5	76.2	51.7	32.7
2012-07-26 05:41:37	27.8055	5.02	76.8	52	32.9
2012-07-26 06:41:37	27.75	5.01	76.5	51.7	32.9
2012-07-26 07:41:37	27.861	5.12	78.3	51.8	32.8
2012-07-26 08:41:37	27.75	5.23	79.8	51.7	32.9
2012-07-26 09:41:37	27.8055	5.26	80.4	51.7	32.9
2012-07-26 10:41:37	27.6945	5.23	79.8	51.9	32.9
2012-07-26 11:41:37	27.75	5.21	79.5	51.7	32.7
2012-07-26 12:41:37	27.8055	5.14	78.6	51.7	32.9
2012-07-26 13:41:37	27.6945	5.05	77.1	51.8	32.7
2012-07-26 14:41:37	27.639	4.98	75.9	51.6	32.7
2012-07-26 15:41:37	27.75	4.97	75.9	51.6	32.7
2012-07-26 16:41:37	27.75	5.02	76.5	51.7	32.7
2012-07-26 17:41:37	27.75	5	76.2	51.8	32.8
2012-07-26 18:41:37	27.75	4.96	75.6	51.7	32.8
2012-07-26 19:41:37	27.861	4.86	74.4	51.8	32.8
2012-07-26 20:41:37	27.6945	4.94	75.3	51.8	32.9
2012-07-26 21:41:37	27.6945	4.96	75.6	51.9	32.7
2012-07-26 22:41:37	27.639	5.02	76.5	51.9	32.8
2012-07-26 23:41:37	27.5835	5.04	76.8	51.7	32.8
2012-07-27 00:41:37	27.639	4.97	75.6	51.9	32.7
2012-07-27 01:41:37	27.75	5.01	76.5	51.6	32.9
2012-07-27 02:41:37	27.861	5	76.5	51.8	33
2012-07-27 03:41:37	27.8055	5.06	77.4	51.8	33
2012-07-27 04:41:37	27.861	5.12	78.3	51.5	32.9
2012-07-27 05:41:37	27.8055	5.11	78	51.8	32.9
2012-07-27 06:41:37	27.8055	5.1	78	51.7	32.9
2012-07-27 07:41:37	27.75	5.07	77.4	51.8	32.9
2012-07-27 08:41:37	27.75	5.17	78.9	51.9	32.7
2012-07-27 09:41:37	27.639	5.16	78.6	51.9	32.9
2012-07-27 10:41:37	27.75	5.34	81.6	51.9	32.9
2012-07-27 11:41:37	27.6945	5.16	78.6	51.7	32.8
2012-07-27 12:41:37	27.639	5.18	78.9	51.8	32.8
2012-07-27 13:41:37	27.639	5.4	82.2	51.7	32.7
2012-07-27 14:41:37	27.75	5.35	81.6	51.8	32.7
2012-07-27 15:41:37	27.9165	5.18	79.2	51.8	32.9
2012-07-27 16:41:37	27.861	5.28	80.7	51.9	32.9
2012-07-27 17:41:37	27.861	5.17	79.2	51.8	33
2012-07-27 18:41:37	27.861	5.26	80.4	51.9	32.9
2012-07-27 19:41:37	27.972	5.28	81	51.8	32.9
2012-07-27 20:41:37	27.861	5.14	78.6	51.8	32.9
2012-07-27 21:41:37	27.861	5.12	78.3	51.8	33
2012-07-27 22:41:37	27.6945	5.19	79.2	51.8	32.9
2012-07-27 23:41:37	27.75	5.07	77.4	51.8	32.9
2012-07-28 00:41:37	27.75	5.23	79.8	51.9	32.9
2012-07-28 01:41:37	27.8055	5.26	80.4	51.8	32.9
2012-07-28 02:41:37	27.75	5.23	79.8	51.8	32.7
2012-07-28 03:41:37	27.639	5.17	78.9	51.7	32.9
2012-07-28 04:41:37	27.639	5.27	80.4	51.9	32.9
2012-07-28 05:41:37	27.639	5.24	79.8	52	32.8
2012-07-28 06:41:37	27.861	5.09	78	51.8	32.9
2012-07-28 07:41:37	27.861	5.21	79.8	51.7	33
2012-07-28 08:41:37	27.861	5.28	80.7	51.8	32.9
2012-07-28 09:41:37	27.8055	5.36	81.9	52	32.9
2012-07-28 10:41:37	27.8055	5.26	80.4	51.8	32.9
2012-07-28 11:41:37	27.861	5.31	81.3	51.7	32.9
2012-07-28 12:41:37	27.75	5.4	82.5	52	32.9
2012-07-28 13:41:37	27.75	5.36	81.9	51.7	32.9
2012-07-28 14:41:37	27.6945	5.42	82.8	51.8	32.9
2012-07-28 15:41:37	27.75	5.44	83.1	51.8	32.8
2012-07-28 16:41:37	27.861	5.41	82.5	51.8	32.9
2012-07-28 17:41:37	27.6945	5.37	81.9	51.8	32.8
2012-07-28 18:41:37	27.6945	5.41	82.5	51.7	32.9
2012-07-28 19:41:37	27.6945	5.43	82.8	51.9	32.9
2012-07-28 20:41:37	27.5835	5.46	83.1	52	32.9
2012-07-28 21:41:37	27.639	5.35	81.6	51.9	32.8
2012-07-28 22:41:37	27.972	5.16	79.2	51.9	32.9
2012-07-28 23:41:37	27.972	5.19	79.5	51.9	33
2012-07-29 00:41:37	27.9165	5.23	80.1	51.9	33
2012-07-29 01:41:37	27.861	5.31	81.3	51.8	32.9
2012-07-29 02:41:37	27.861	5.22	79.8	51.8	32.9
2012-07-29 03:41:37	27.8055	5.28	80.7	51.8	32.9
2012-07-29 04:41:37	27.639	5.29	80.7	52	32.9
2012-07-29 05:41:37	27.75	5.13	78.3	51.8	32.8
2012-07-29 06:41:37	27.639	5.24	79.8	52.1	32.9
2012-07-29 07:41:37	27.861	5.19	79.5	51.8	32.9
2012-07-29 08:41:37	27.75	5.19	79.2	52	32.9
2012-07-29 09:41:37	27.8055	5.18	79.2	51.8	32.9
2012-07-29 10:41:37	27.8055	5.25	80.4	51.8	32.9
2012-07-29 11:41:37	27.8055	5.3	81	51.8	33
2012-07-29 12:41:37	27.75	5.21	79.5	51.8	32.9
2012-07-29 13:41:37	27.75	5.38	82.2	51.8	32.9
2012-07-29 14:41:37	27.75	5.34	81.6	51.8	32.9
2012-07-29 15:41:37	27.5835	5.26	80.1	51.9	32.9
2012-07-29 16:41:37	27.75	5.19	79.2	51.9	32.8
2012-07-29 17:41:37	27.861	5.19	79.5	51.8	33
2012-07-29 18:41:37	27.861	5.08	77.7	51.9	33
2012-07-29 19:41:37	27.8055	5.06	77.4	52	32.9
2012-07-29 20:41:37	27.75	5.23	79.8	51.9	32.9
2012-07-29 21:41:37	27.75	4.99	76.2	51.9	32.9
2012-07-29 22:41:37	27.75	5.15	78.6	51.7	32.9
2012-07-29 23:41:37	27.861	4.96	75.9	51.9	32.9
2012-07-30 00:41:37	27.8055	5.16	78.9	52	33
2012-07-30 01:41:37	27.861	5	76.5	51.8	33
2012-07-30 02:41:37	27.6945	5.09	77.7	51.9	32.9
2012-07-30 03:41:37	27.6945	5.07	77.4	52	32.9
2012-07-30 04:41:37	27.861	5.08	77.7	51.9	33
2012-07-30 05:41:37	27.75	5.23	79.8	51.9	32.9
2012-07-30 06:41:37	27.75	5.15	78.6	51.7	32.8
2012-07-30 07:41:37	27.639	5.19	79.2	52	32.9
2012-07-30 08:41:37	27.861	5.17	79.2	51.8	33
2012-07-30 09:41:37	27.75	5.27	80.4	52.1	32.9
2012-07-30 10:41:37	27.6945	5.37	81.9	51.9	32.9
2012-07-30 11:41:37	27.75	4.99	76.2	51.9	32.9
2012-07-30 12:41:37	27.972	4.63	71.1	52	33.2
2012-07-30 13:41:37	27.972	4.93	75.6	52	33.1
2012-07-30 14:41:37	27.8055	4.98	76.2	52.1	33.1
2012-07-30 15:41:37	27.9165	5.15	78.9	52.1	33.2
2012-07-30 16:41:37	27.861	5.05	77.4	52.1	33.1
2012-07-30 17:41:37	27.8055	5.08	77.7	52	33
2012-07-30 18:41:37	27.75	5.07	77.4	51.9	33
2012-07-30 19:41:37	27.639	5.09	77.7	52.1	33
2012-07-30 20:41:37	27.6945	5.11	78	51.9	32.9
2012-07-30 21:41:37	27.75	5.05	77.1	52.1	33
2012-07-30 22:41:37	27.9165	5.01	76.8	52.1	33
2012-07-30 23:41:37	27.8055	5.2	79.5	52.1	33
2012-07-31 00:41:37	27.75	5.09	77.7	52.2	33
2012-07-31 01:41:37	27.6945	5.17	78.9	52	32.9
2012-07-31 02:41:37	27.639	5.12	78.3	52.2	33.2
2012-07-31 03:41:37	27.861	5.1	78	52.1	33
2012-07-31 04:41:37	27.75	5.18	79.2	52.2	33
2012-07-31 05:41:37	27.6945	5.15	78.6	51.9	33
2012-07-31 06:41:37	27.639	5.09	77.7	51.9	32.9
2012-07-31 07:41:37	27.861	5.13	78.6	52.1	33.1
2012-07-31 08:41:37	27.75	5.3	81	52.2	33
2012-07-31 09:41:37	27.75	5.24	80.1	52.1	33
2012-07-31 10:41:37	27.75	5.32	81.3	52.1	33
2012-07-31 11:41:37	27.8055	5.1	78	52.1	33.1
2012-07-31 12:41:37	27.8055	5.14	78.6	52.2	33.1
2012-07-31 13:41:37	27.75	5.16	78.9	52.1	33
2012-07-31 14:41:37	27.75	5.14	78.6	52	33
2012-07-31 15:41:37	27.6945	5.15	78.6	52.3	33
2012-07-31 16:41:37	27.8055	5.14	78.6	52.2	33
2012-07-31 17:41:37	27.75	5.06	77.4	52.1	33.1
2012-07-31 18:41:37	27.861	5.15	78.9	52.1	33.1
2012-07-31 19:41:37	27.75	5.22	79.8	52.2	33
2012-07-31 20:41:37	27.8055	5.1	78	52	33.1
2012-07-31 21:41:37	27.639	5.11	78	52.2	33
2012-07-31 22:41:37	27.6945	5.21	79.5	52.2	33
2012-07-31 23:41:37	27.861	5.25	80.4	52.2	33.2
2012-08-01 00:41:37	27.8055	5.19	79.5	52.2	33
2012-08-01 01:41:37	27.6945	5.17	78.9	52.1	33
2012-08-01 02:41:37	27.639	5.31	81	52.2	33
2012-08-01 03:41:37	27.861	5.17	79.2	52.2	33.2
2012-08-01 04:41:37	27.972	5.16	79.2	52.1	33.1
2012-08-01 05:41:37	27.75	5.18	79.2	52	33.1
2012-08-01 06:41:37	27.75	5.28	80.7	52.1	33
2012-08-01 07:41:37	27.639	5.39	82.2	52	33
2012-08-01 09:42:18	27.8055	5.28	80.7	52.2	33
2012-08-01 10:42:18	27.8055	5.21	79.5	52.2	33
2012-08-01 11:42:18	27.861	5.14	78.6	52.2	33.1
2012-08-01 12:42:18	27.861	5.17	79.2	52.1	33.1
2012-08-01 13:42:18	27.861	5.14	78.6	52.2	33.1
2012-08-01 14:42:18	27.6945	5.1	78	52.1	33
2012-08-01 15:42:18	27.639	5.17	78.9	52.1	33
2012-08-01 16:42:18	27.861	5.09	78	52.1	33.2
2012-08-01 17:42:18	27.8055	5.09	78	52.1	33.1
2012-08-01 18:42:18	27.639	5.13	78.3	52.3	33.1
2012-08-01 19:42:18	27.639	5.15	78.6	52.2	33
2012-08-01 20:42:18	27.639	5.17	78.9	52.3	33.1
2012-08-01 21:42:18	27.8055	5.05	77.4	52.2	33.2
2012-08-01 22:42:18	27.75	5.14	78.6	52.1	33.1
2012-08-01 23:42:18	27.75	5.08	77.7	52.2	33.1
2012-08-02 00:42:18	27.6945	5.11	78	52.3	33.1
2012-08-02 01:42:18	27.9165	5.14	78.9	52.3	33.2
2012-08-02 02:42:18	27.75	5.14	78.6	52.3	33.1
2012-08-02 03:42:18	27.75	5.15	78.6	52.3	33.1
2012-08-02 04:42:18	27.639	5.21	79.5	52.2	33
2012-08-02 05:42:18	27.9165	5.19	79.5	52.3	33.2
2012-08-02 06:42:18	27.9165	5.21	79.8	52.2	33.1
2012-08-02 07:42:18	27.8055	5.28	80.7	52.2	33.1
2012-08-02 08:42:18	27.75	5.3	81	52.3	33.1
2012-08-02 09:42:18	27.75	5.3	81	52.2	33.1
2012-08-02 10:42:18	27.8055	5.18	79.2	52.3	33.1
2012-08-02 11:42:18	27.6945	5.13	78.3	52.2	33.1
2012-08-02 12:42:18	27.6945	5.16	78.9	52.2	33.1
2012-08-02 13:42:18	27.861	5.13	78.6	52.2	33.2
2012-08-02 14:42:18	27.6945	5.13	78.3	52.3	33.1
2012-08-02 15:42:18	27.6945	5.09	77.7	52.3	33.1
2012-08-02 16:42:18	27.861	5.13	78.6	52.3	33.2
2012-08-02 17:42:18	27.8055	5.04	77.1	52.4	33.2
2012-08-02 18:42:18	27.861	5.1	78	52.3	33.2
2012-08-02 19:42:18	27.6945	5.1	78	52.2	33.1
2012-08-02 20:42:18	27.75	5.18	79.2	52.3	33.1
2012-08-02 21:42:18	27.8055	5.13	78.6	52.4	33.2
2012-08-02 22:42:18	27.6945	5.14	78.6	52.4	33.2
2012-08-02 23:42:18	27.75	5.1	78	52.3	33.2
2012-08-03 00:42:18	27.6945	5.18	79.2	52.3	33.1
2012-08-03 01:42:18	27.6945	5.15	78.6	52.4	33.1
2012-08-03 02:42:18	27.861	5.17	79.2	52.3	33.2
2012-08-03 03:42:18	27.8055	5.24	80.1	52.5	33.2
2012-08-03 04:42:18	27.75	5.3	81	52.4	33.1
2012-08-03 05:42:18	27.639	5.31	81	52.4	33.1
2012-08-03 06:42:18	27.861	5.25	80.4	52.3	33.2
2012-08-03 07:42:18	27.8055	5.31	81.3	52.4	33.2
2012-08-03 08:42:18	27.75	5.3	81	52.3	33.2
2012-08-03 09:42:18	27.75	5.3	81	52.2	33.2
2012-08-03 10:42:18	27.75	5.33	81.3	52.3	33.1
2012-08-03 11:42:18	27.861	5.36	82.2	52.4	33.3
2012-08-03 12:42:18	27.8055	5.37	82.2	52.4	33.2
2012-08-03 13:42:18	27.861	5.45	83.4	52.4	33.2
2012-08-03 14:42:18	27.75	5.41	82.8	52.4	33.2
2012-08-03 15:42:18	27.6945	5.4	82.5	52.4	33.2
2012-08-03 16:42:18	27.639	5.4	82.5	52.2	33.1
2012-08-03 17:42:18	27.861	5.42	83.1	52.3	33.3
2012-08-03 18:42:18	27.8055	5.36	82.2	52.4	33.3
2012-08-03 19:42:18	27.75	5.45	83.4	52.4	33.2
2012-08-03 20:42:18	27.8055	5.33	81.6	52.4	33.2
2012-08-03 21:42:18	27.639	5.38	82.2	52.4	33.2
2012-08-03 22:42:18	27.75	5.41	82.8	52.5	33.3
2012-08-03 23:42:18	27.861	5.4	82.8	52.4	33.3
2012-08-04 00:42:18	27.8055	5.45	83.4	52.4	33.2
2012-08-04 01:42:18	27.75	5.41	82.8	52.4	33.2
2012-08-04 02:42:18	27.639	5.46	83.4	52.5	33.2
2012-08-04 03:42:18	27.861	5.34	81.9	52.4	33.3
2012-08-04 04:42:18	27.8055	5.4	82.8	52.5	33.3
2012-08-04 05:42:18	27.75	5.37	82.2	52.4	33.2
2012-08-04 06:42:18	27.5835	5.47	83.4	52.4	33.2
2012-08-04 07:42:18	27.639	5.37	82.2	52.4	33.2
2012-08-04 08:42:18	27.972	5.4	82.8	52.4	33.3
2012-08-04 09:42:18	27.8055	5.44	83.4	52.3	33.3
2012-08-04 10:42:18	27.75	5.39	82.5	52.4	33.2
2012-08-04 11:42:18	27.6945	5.52	84.3	52.5	33.2
2012-08-04 12:42:18	27.639	5.44	83.1	52.4	33.2
2012-08-04 13:42:18	27.861	5.45	83.4	52.5	33.3
2012-08-04 14:42:18	27.861	5.4	82.8	52.4	33.3
2012-08-04 15:42:18	27.8055	5.42	83.1	52.3	33.2
2012-08-04 16:42:18	27.6945	5.41	82.8	52.4	33.2
2012-08-04 17:42:18	27.6945	5.52	84.3	52.4	33.2
2012-08-04 18:42:18	27.6945	5.5	84	52.4	33.1
2012-08-04 19:42:18	27.861	5.41	83.1	52.3	33.3
2012-08-04 20:42:18	27.861	5.46	83.7	52.4	33.2
2012-08-04 21:42:18	27.639	5.46	83.4	52.4	33.2
2012-08-04 22:42:18	27.639	5.48	83.7	52.4	33.2
2012-08-04 23:42:18	27.8055	5.49	84	52.5	33.2
2012-08-05 00:42:18	27.8055	5.45	83.4	52.5	33.2
2012-08-05 01:42:18	27.75	5.45	83.4	52.4	33.2
2012-08-05 02:42:18	27.6945	5.52	84.3	52.4	33.2
2012-08-05 03:42:18	27.75	5.53	84.6	52.4	33.2
2012-08-05 04:42:18	27.9165	5.49	84.3	52.6	33.3
2012-08-05 05:42:18	27.75	5.45	83.4	52.4	33.2
2012-08-05 06:42:18	27.639	5.54	84.6	52.4	33.2
2012-08-05 07:42:18	27.528	5.47	83.4	52.5	33.2
2012-08-05 08:42:18	27.8055	5.42	83.1	52.4	33.3
2012-08-05 09:42:18	27.8055	5.48	84	52.4	33.3
2012-08-05 10:42:18	27.75	5.53	84.6	52.4	33.2
2012-08-05 11:42:18	27.6945	5.46	83.4	52.4	33.2
2012-08-05 12:42:18	27.75	5.49	84	52.4	33.2
2012-08-05 13:42:18	27.861	5.46	83.7	52.4	33.3
2012-08-05 14:42:18	27.75	5.53	84.6	52.5	33.3
2012-08-05 15:42:18	27.75	5.45	83.4	52.4	33.2
2012-08-05 16:42:18	27.639	5.36	81.9	52.5	33.2
2012-08-05 17:42:18	27.8055	5.4	82.8	52.4	33.3
2012-08-05 18:42:18	27.861	5.38	82.5	52.4	33.3
2012-08-05 19:42:18	27.6945	5.46	83.4	52.4	33.2
2012-08-05 20:42:18	27.75	5.37	82.2	52.4	33.2
2012-08-05 21:42:18	27.639	5.46	83.4	52.5	33.2
2012-08-05 22:42:18	27.5835	5.38	82.2	52.5	33.2
2012-08-05 23:42:18	27.861	5.29	81	52.6	33.4
2012-08-06 00:42:18	27.8055	5.29	81	52.5	33.3
2012-08-06 01:42:18	27.75	5.35	81.9	52.5	33.2
2012-08-06 02:42:18	27.6945	5.28	80.7	52.5	33.2
2012-08-06 03:42:18	27.8055	5.26	80.4	52.6	33.3
2012-08-06 04:42:18	27.8055	5.33	81.6	52.5	33.3
2012-08-06 05:42:18	27.6945	5.3	81	52.5	33.3
2012-08-06 06:42:18	27.75	5.32	81.3	52.4	33.2
2012-08-06 07:42:18	27.639	5.38	82.2	52.5	33.3
2012-08-06 08:42:18	27.861	5.36	82.2	52.5	33.4
2012-08-06 09:42:18	27.75	5.41	82.8	52.4	33.3
2012-08-06 10:42:18	27.75	5.37	82.2	52.5	33.3
2012-08-06 11:42:18	27.6945	5.32	81.3	52.6	33.3
2012-08-06 12:42:18	27.75	5.37	82.2	52.6	33.3
2012-08-08 09:43:01	27.639	5.21	79.8	52.7	33.4
2012-08-08 10:43:01	27.639	5.26	80.4	52.7	33.4
2012-08-08 11:43:01	27.6945	5.18	79.2	52.8	33.4
2012-08-08 12:43:01	28.194	5.13	79.2	52.3	33.4
2012-08-08 13:43:01	28.0275	5.13	78.9	52.2	33.3
2012-08-08 14:43:01	28.0275	5.02	77.1	52.3	33.3
2012-08-08 15:43:01	27.972	5.04	77.4	52.2	33.3
2012-08-08 16:43:01	27.9165	5.03	77.1	52.3	33.2
2012-08-08 17:43:01	27.861	5.11	78.3	52.3	33.2
2012-08-08 18:43:01	27.861	5.17	79.2	52.3	33.2
2012-08-08 19:43:01	27.75	5.28	80.7	52.3	33.2
2012-08-08 20:43:01	27.8055	5.35	81.9	52.2	33.1
2012-08-08 21:43:01	27.75	5.27	80.4	52.3	33.1
2012-08-08 22:43:01	27.639	5.15	78.6	52.2	33
2012-08-08 23:43:01	27.861	5.11	78.3	52.2	33.2
2012-08-09 00:43:01	27.9165	5.16	79.2	52.2	33.2
2012-08-09 01:43:01	27.75	5.14	78.6	52.2	33.1
2012-08-09 02:43:01	27.5835	5.31	81	52.2	33
2012-08-09 03:43:01	27.861	5.21	79.8	52.3	33.1
2012-08-09 04:43:01	27.8055	5.25	80.4	52.3	33.1
2012-08-09 05:43:01	27.75	5.54	84.6	52.3	33
2012-08-09 06:43:01	27.639	5.43	82.8	52.2	33
2012-08-09 07:43:01	27.861	5.27	80.7	52.2	33.1
2012-08-09 08:43:01	27.75	5.27	80.7	52.1	33.1
2012-08-09 09:43:01	27.75	5.32	81.3	52.2	33.1
2012-08-09 10:43:01	27.75	5.23	79.8	52.2	33
2012-08-09 11:43:01	27.8055	5.24	80.1	52.2	33.1
2012-08-09 12:43:01	27.8055	5.18	79.2	52.2	33.1
2012-08-09 13:43:01	27.75	5.14	78.6	52.2	33.1
2012-08-09 14:43:01	27.639	5.06	77.1	52.2	33
2012-08-09 15:43:01	27.861	5.11	78.3	52.3	33.2
2012-08-09 16:43:01	27.8055	5.1	78	52.2	33.1
2012-08-09 17:43:01	27.75	5.11	78	52.2	33
2012-08-09 18:43:01	27.639	5.11	78	52.2	33
2012-08-09 19:43:01	27.861	5.07	77.7	52.2	33.2
2012-08-09 20:43:01	27.972	5	76.8	52.2	33.1
2012-08-09 21:43:01	27.8055	5.04	77.1	52.2	33.1
2012-08-09 22:43:01	27.75	5.07	77.4	52.1	33
2012-08-09 23:43:01	27.6945	5.19	79.2	52.3	33
2012-08-10 00:43:01	27.861	5.2	79.5	52.2	33.1
2012-08-10 01:43:01	27.8055	5.14	78.6	52.2	33.1
2012-08-10 02:43:01	27.8055	5.31	81	52.3	33.1
2012-08-10 03:43:01	27.639	5.27	80.4	52.3	33
2012-08-10 04:43:01	27.6945	5.22	79.8	52.2	33.1
2012-08-10 05:43:01	27.8055	5.13	78.6	52.2	33.1
2012-08-10 06:43:01	27.75	5.18	79.2	52.2	33.1
2012-08-10 07:43:01	27.75	5.22	79.8	52.2	33
2012-08-10 08:43:01	27.639	5.25	80.1	52.2	33
2012-08-10 09:43:01	27.861	5.23	80.1	52.2	33.2
2012-08-10 10:43:01	27.75	5.16	78.9	52.2	33.1
2012-08-10 11:43:01	27.75	5.22	79.8	52.2	33
2012-08-10 12:43:01	27.8055	5.34	81.6	52.2	33
2012-08-10 13:43:01	27.6945	5.27	80.4	52.2	33
2012-08-10 14:43:01	27.861	5.35	81.9	52.2	33.2
2012-08-10 15:43:01	27.8055	5.33	81.6	52.2	33.1
2012-08-10 16:43:01	27.75	5.3	81	52.2	33.1
2012-08-10 17:43:01	27.639	5.34	81.6	52.1	33
2012-08-10 18:43:01	27.6945	5.35	81.6	52.2	33
2012-08-15 09:43:43	27.639	5.3	80.7	51.6	32.7
2012-08-15 10:43:43	27.639	5.24	79.8	51.7	32.7
2012-08-15 11:43:43	27.861	5.04	77.1	51.8	32.8
2012-08-15 12:43:43	27.8055	5.12	78.3	51.7	32.9
2012-08-15 13:43:43	28.0275	4.79	73.5	51.6	32.9
2012-08-15 14:43:43	27.972	4.89	75	51.7	32.9
2012-08-15 15:43:43	28.083	4.79	73.5	51.6	32.9
2012-08-15 16:43:43	28.0275	4.83	74.1	51.7	32.9
2012-08-15 17:43:43	27.972	4.81	73.8	51.6	32.9
2012-08-15 18:43:43	27.9165	4.83	74.1	51.7	32.9
2012-08-15 19:43:43	27.9165	5	76.5	51.7	32.7
2012-08-15 20:43:43	27.861	5.02	76.8	51.7	32.9
2012-08-15 21:43:43	27.8055	4.98	76.2	51.7	32.7
2012-08-15 22:43:43	27.75	5.09	77.7	51.5	32.7
2012-08-15 23:43:43	27.6945	5.04	76.8	51.6	32.6
2012-08-16 00:43:43	27.639	5.04	76.8	51.6	32.7
2012-08-16 01:43:43	27.861	5.03	76.8	51.4	32.9
2012-08-16 02:43:43	27.8055	5.14	78.6	51.4	32.7
2012-08-16 03:43:43	27.6945	5.12	78	51.5	32.6
2012-08-16 04:43:43	27.6945	5	76.2	51.5	32.6
2012-08-16 05:43:43	27.861	5.09	77.7	51.5	32.7
2012-08-16 06:43:43	27.639	5.18	78.9	51.5	32.7
2012-08-16 07:43:43	27.6945	5.28	80.4	51.6	32.7
2012-08-16 08:43:43	27.639	5.2	79.2	51.7	32.6
2012-08-16 09:43:43	27.75	5.23	79.8	51.6	32.7
2012-08-16 10:43:43	27.75	5.27	80.4	51.6	32.7
2012-08-16 11:43:43	27.639	5.24	79.8	51.6	32.7
2012-08-16 12:43:43	27.639	5.2	79.2	51.5	32.7
2012-08-16 13:43:43	27.8055	5.21	79.5	51.5	32.7
2012-08-16 14:43:43	27.75	5.17	78.9	51.4	32.7
2012-08-16 15:43:43	27.639	5.25	79.8	51.6	32.7
2012-08-16 16:43:43	27.6945	5.18	78.9	51.5	32.7
2012-08-16 17:43:43	27.861	5.2	79.5	51.5	32.8
2012-08-16 18:43:43	27.8055	5.27	80.4	51.6	32.7
2012-08-16 19:43:43	27.6945	5.28	80.4	51.6	32.7
2012-08-16 20:43:43	27.6945	5.31	81	51.6	32.7
2012-08-16 21:43:43	27.5835	5.34	81.3	51.6	32.7
2012-08-16 22:43:43	27.861	5.18	79.2	51.7	32.8
2012-08-16 23:43:43	27.75	5.33	81.3	51.5	32.7
2012-08-17 00:43:43	27.75	5.33	81.3	51.5	32.7
2012-08-17 01:43:43	27.528	5.33	81	51.6	32.6
2012-08-17 02:43:43	27.6945	5.31	81	51.6	32.7
2012-08-17 03:43:43	27.8055	5.38	82.2	51.7	32.8
2012-08-17 04:43:43	27.639	5.34	81.3	51.6	32.7
2012-08-17 05:43:43	27.639	5.38	81.9	51.6	32.7
2012-08-17 06:43:43	27.8055	5.42	82.8	51.4	32.7
2012-08-17 07:43:43	27.8055	5.48	83.7	51.5	32.7
2012-08-17 08:43:43	27.8055	5.42	82.8	51.5	32.7
2012-08-17 09:43:43	27.6945	5.51	84	51.6	32.6
2012-08-17 10:43:43	27.6945	5.45	83.1	51.5	32.7
2012-08-17 11:43:43	27.861	5.47	83.7	51.5	32.7
2012-08-17 12:43:43	27.8055	5.58	85.2	51.6	32.7
2012-08-17 13:43:43	27.75	5.39	82.2	51.5	32.7
2012-08-17 14:43:43	27.6945	5.4	82.2	51.7	32.7
2012-08-17 15:43:43	27.639	5.5	83.7	51.6	32.7
2012-08-17 16:43:43	27.8055	5.53	84.6	51.7	32.9
2012-08-17 17:43:43	27.8055	5.42	82.8	51.5	32.7
2012-08-17 18:43:43	27.861	5.56	84.9	51.6	32.7
2012-08-17 19:43:43	27.6945	5.47	83.4	51.6	32.6
2012-08-17 20:43:43	27.639	5.46	83.1	51.6	32.7
2012-08-17 21:43:43	27.75	5.44	83.1	51.5	32.7
2012-08-17 22:43:43	27.861	5.38	82.2	51.5	32.7
2012-08-17 23:43:43	27.639	5.48	83.4	51.6	32.7
2012-08-18 00:43:43	27.8055	5.42	82.8	51.6	32.7
2012-08-18 01:43:43	27.528	5.45	82.8	51.6	32.7
2012-08-18 02:43:43	27.861	5.46	83.4	51.5	32.8
2012-08-18 03:43:43	27.8055	5.4	82.5	51.7	32.7
2012-08-18 04:43:43	27.6945	5.44	83.1	51.7	32.7
2012-08-18 05:43:43	27.6945	5.53	84.3	51.7	32.7
2012-08-18 06:43:43	27.6945	5.43	82.8	51.5	32.7
2012-08-18 07:43:43	27.861	5.33	81.6	51.5	32.7
2012-08-18 08:43:43	27.6945	5.43	82.8	51.6	32.7
2012-08-18 09:43:43	27.75	5.43	82.8	51.6	32.7
2012-08-18 10:43:43	27.75	5.45	83.1	51.5	32.7
2012-08-18 11:43:43	27.639	5.38	81.9	51.5	32.7
2012-08-18 12:43:43	27.861	5.47	83.7	51.4	32.9
2012-08-18 13:43:43	27.8055	5.54	84.6	51.6	32.8
2012-08-18 14:43:43	27.6945	5.51	84	51.6	32.7
2012-08-18 15:43:43	27.639	5.53	84.3	51.7	32.7
2012-08-18 16:43:43	27.75	5.55	84.6	51.4	32.7
2012-08-18 17:43:43	27.861	5.49	84	51.4	32.8
2012-08-18 18:43:43	27.8055	5.54	84.6	51.6	32.7
2012-08-18 19:43:43	27.75	5.51	84	51.7	32.7
2012-08-18 20:43:43	27.639	5.54	84.3	51.7	32.6
2012-08-18 21:43:43	27.6945	5.47	83.4	51.6	32.7
2012-08-18 22:43:43	27.861	5.5	84	51.5	32.9
2012-08-18 23:43:43	27.75	5.51	84	51.7	32.7
2012-08-19 00:43:43	27.6945	5.47	83.4	51.6	32.7
2012-08-19 01:43:43	27.639	5.52	84	51.6	32.7
2012-08-19 02:43:43	27.861	5.45	83.4	51.7	32.8
2012-08-19 03:43:43	27.861	5.41	82.5	51.5	32.7
2012-08-19 04:43:43	27.6945	5.59	85.2	51.6	32.7
2012-08-19 05:43:43	27.639	5.58	84.9	51.6	32.7
2012-08-19 06:43:43	27.861	5.5	84	51.5	32.7
2012-08-19 07:43:43	27.861	5.52	84.3	51.5	32.9
2012-08-19 08:43:43	27.75	5.62	85.8	51.7	32.7
2012-08-19 09:43:43	27.75	5.31	81	51.6	32.7
2012-08-19 10:43:43	27.639	5.32	81	51.5	32.6
2012-08-19 11:43:43	27.8055	5.62	85.8	51.8	32.9
2012-08-19 12:43:43	27.8055	5.44	83.1	51.6	32.7
2012-08-19 14:50:13	27.639	5.31	81	51.7	32.7
2012-08-19 15:50:13	27.861	5.44	83.1	51.7	32.8
2012-08-19 16:50:13	27.639	5.35	81.6	51.6	32.7
2012-08-19 17:50:13	27.639	5.4	82.2	51.7	32.7
2012-08-19 18:50:13	27.6945	5.43	82.8	51.7	32.7
2012-08-19 19:50:13	27.861	5.45	83.4	51.9	32.9
2012-08-19 20:50:13	27.8055	5.42	82.8	51.6	32.9
2012-08-19 21:50:13	27.639	5.36	81.6	51.5	32.7
2012-08-19 22:50:13	27.6945	5.31	81	51.6	32.7
2012-08-19 23:50:13	27.8055	5.23	79.8	51.8	32.9
2012-08-20 00:50:13	27.75	5.27	80.4	51.8	32.8
2012-08-20 01:50:13	27.639	5.28	80.4	51.7	32.8
2012-08-20 02:50:13	27.861	5.29	81	51.9	32.9
2012-08-20 03:50:13	27.75	5.25	80.1	51.9	32.9
2012-08-20 04:50:13	27.5835	5.36	81.6	51.7	32.7
2012-08-20 05:50:13	27.6945	5.29	80.7	51.6	32.8
2012-08-20 06:50:13	27.861	5.37	82.2	51.7	32.9
2012-08-20 07:50:13	27.75	5.35	81.6	51.8	32.8
2012-08-20 08:50:13	27.6945	5.35	81.6	51.7	32.7
2012-08-20 09:50:13	27.75	5.27	80.4	51.7	32.7
2012-08-20 10:50:13	27.75	5.11	78	51.9	32.9
2012-08-20 11:50:13	27.75	5.05	77.1	51.5	32.7
2012-08-20 12:50:13	27.6945	5.28	80.4	51.6	32.7
2012-08-20 13:50:13	27.639	5.3	80.7	51.5	32.7
2012-08-20 14:50:13	27.861	4.98	76.2	51.4	32.8
2012-08-20 15:50:13	27.6945	5.14	78.6	51.5	32.7
2012-08-20 16:50:13	27.75	5.27	80.4	51.6	32.7
2012-08-20 17:50:13	27.639	5.2	79.2	51.6	32.6
2012-08-20 18:50:13	27.75	5.17	78.9	51.6	32.7
2012-08-20 19:50:13	27.861	5.26	80.4	51.5	32.7
2012-08-20 20:50:13	27.75	5.33	81.3	51.7	32.8
2012-08-20 21:50:13	27.75	5.31	81	51.5	32.7
2012-08-20 22:50:13	27.639	5.36	81.6	51.6	32.7
2012-08-20 23:50:13	27.861	5.27	80.7	51.6	32.7
2012-08-21 00:50:13	27.75	5.27	80.4	51.7	32.7
2012-08-21 01:50:13	27.75	5.35	81.6	51.5	32.7
2012-08-21 02:50:13	27.5835	5.4	82.2	51.6	32.7
2012-08-21 03:50:13	27.639	5.35	81.6	51.6	32.7
2012-08-21 04:50:13	27.8055	5.38	82.2	51.5	32.7
2012-08-21 05:50:13	27.75	5.35	81.6	51.6	32.7
2012-08-21 06:50:13	27.6945	5.37	81.9	51.6	32.7
2012-08-21 07:50:13	27.528	5.34	81	51.6	32.7
2012-08-21 08:50:13	27.9165	5.41	82.8	51.6	32.7
2012-08-21 09:50:13	27.8055	5.34	81.6	51.6	32.7
2012-08-21 10:50:13	27.75	5.43	82.8	51.5	32.7
2012-08-21 11:50:13	27.5835	5.4	82.2	51.7	32.7
2012-08-21 12:50:13	27.8055	5.32	81.3	51.5	32.7
2012-08-21 13:50:13	27.6945	5.35	81.6	51.6	32.7
2012-08-21 14:50:13	27.639	5.48	83.4	51.5	32.7
2012-08-21 15:50:13	27.8055	5.3	81	51.4	32.7
2012-08-21 16:50:13	27.861	5.24	80.1	51.6	32.9
2012-08-21 17:50:13	27.75	5.31	81	51.7	32.7
2012-08-21 18:50:13	27.639	5.24	79.8	51.6	32.7
2012-08-21 19:50:13	27.8055	5.17	78.9	51.7	32.7
2012-08-21 20:50:13	27.9165	5.36	81.9	51.6	32.7
2012-08-21 21:50:13	27.861	5.18	79.2	51.5	32.7
2012-08-21 22:50:13	27.6945	5.33	81.3	51.7	32.7
2012-08-21 23:50:13	27.8055	5.3	81	51.6	32.7
2012-08-22 00:50:13	27.861	5.36	81.9	51.5	32.8
2012-08-22 01:50:13	27.8055	5.31	81	51.6	32.8
2012-08-22 02:50:13	27.639	5.38	81.9	51.7	32.7
2012-08-22 03:50:13	27.639	5.34	81.3	51.6	32.7
2012-08-22 04:50:13	27.75	5.27	80.4	51.8	32.9
2012-08-22 05:50:13	27.6945	5.23	79.8	51.6	32.7
2012-08-22 06:50:13	27.75	5.31	81	51.5	32.7
2012-08-22 07:50:13	27.639	5.48	83.4	51.7	32.7
2012-08-22 09:44:24	27.75	5.52	84.3	51.8	32.8
2012-08-22 10:44:24	27.8055	5.4	82.5	51.7	32.9
2012-08-22 11:44:24	27.5835	4.96	75.6	51.6	32.7
2012-08-22 12:44:24	27.75	5.38	82.2	51.9	32.9
2012-08-22 13:44:24	27.8055	5.34	81.6	52	33
2012-08-22 14:44:24	27.75	5.25	80.1	51.8	32.9
2012-08-22 15:44:24	27.75	5.28	80.7	51.8	33
2012-08-22 16:44:24	27.6945	5.27	80.4	51.8	32.9
2012-08-22 17:44:24	27.75	5.28	80.7	51.8	32.9
2012-08-22 18:44:24	27.972	5.26	80.7	51.8	33
2012-08-22 19:44:24	27.639	5.43	82.8	52	32.9
2012-08-22 20:44:24	27.75	5.41	82.5	51.8	32.9
2012-08-22 21:44:24	27.639	5.38	81.9	51.9	32.8
2012-08-22 22:44:24	27.8055	5.4	82.5	51.9	33
2012-08-22 23:44:24	27.75	5.34	81.6	52	33
2012-08-23 00:44:24	27.8055	5.23	79.8	51.8	32.9
2012-08-23 01:44:24	27.6945	5.29	80.7	51.8	32.9
2012-08-23 02:44:24	27.861	5.37	81.9	52	32.9
2012-08-23 03:44:24	27.861	5.26	80.4	52	33
2012-08-23 04:44:24	27.8055	5.3	81	51.8	32.9
2012-08-23 05:44:24	27.6945	5.27	80.4	51.8	32.9
2012-08-23 06:44:24	27.639	5.27	80.4	52	32.9
2012-08-23 07:44:24	27.861	5.26	80.4	51.9	32.9
2012-08-23 08:44:24	27.8055	5.33	81.6	51.9	33
2012-08-23 09:44:24	27.75	5.37	81.9	51.8	32.9
2012-08-23 10:44:24	27.639	5.43	82.8	51.7	32.7
2012-08-23 11:44:24	27.75	5.3	81	51.9	32.9
2012-08-23 12:44:24	27.75	5.28	80.7	51.9	32.9
2012-08-23 13:44:24	27.75	5.3	81	51.8	32.9
2012-08-23 14:44:24	27.75	5.34	81.6	51.9	33
2012-08-23 15:44:24	27.8055	5.3	81	51.9	32.9
2012-08-23 16:44:24	27.639	5.24	79.8	51.9	32.8
2012-08-23 17:44:24	27.639	5.37	81.9	51.9	32.9
2012-08-23 18:44:24	27.861	5.29	81	51.8	33
2012-08-23 19:44:24	27.75	5.17	78.9	51.8	32.9
2012-08-23 20:44:24	27.861	5.22	79.8	51.9	32.9
2012-08-23 21:44:24	27.6945	5.27	80.4	52	32.9
2012-08-23 22:44:24	27.75	5.23	79.8	52.1	32.9
2012-08-23 23:44:24	27.75	5.36	81.9	52.1	33
2012-08-24 00:44:24	27.75	5.34	81.6	51.9	32.9
2012-08-24 01:44:24	27.639	5.36	81.6	51.9	32.9
2012-08-24 02:44:24	27.6945	5.27	80.4	51.8	32.9
2012-08-24 03:44:24	27.8055	5.28	80.7	52	33
2012-08-24 04:44:24	27.861	5.45	83.4	52	33
2012-08-24 05:44:24	27.75	5.48	83.7	51.7	32.9
2012-08-24 06:44:24	27.639	5.57	84.9	52	32.9
2012-08-24 07:44:24	27.75	5.5	84	51.9	32.9
2012-08-24 08:44:24	27.75	5.54	84.6	52	32.9
2012-08-24 09:44:24	27.75	5.58	85.2	51.9	33
2012-08-24 10:44:24	27.6945	5.62	85.8	51.9	32.9
2012-08-24 11:44:24	27.639	5.63	85.8	51.8	32.7
2012-08-24 12:44:24	27.8055	5.63	86.1	51.9	32.9
2012-08-24 13:44:24	27.8055	5.61	85.8	52	32.9
2012-08-24 14:44:24	27.75	5.6	85.5	51.8	32.9
2012-08-24 15:44:24	27.6945	5.62	85.8	51.7	32.9
2012-08-24 16:44:24	27.5835	5.72	87.1	51.9	32.9
2012-08-24 17:44:24	27.861	5.65	86.4	51.9	32.9
2012-08-24 18:44:24	27.75	5.68	86.8	51.9	33
2012-08-24 19:44:24	27.861	5.69	87.1	51.8	32.9
2012-08-24 20:44:24	27.6945	5.62	85.8	52	32.9
2012-08-24 21:44:24	27.6945	5.64	86.1	51.8	32.9
2012-08-24 22:44:24	27.861	5.63	86.1	52	32.9
2012-08-24 23:44:24	27.639	5.67	86.4	52	32.9
2012-08-25 00:44:24	27.6945	5.6	85.5	51.9	32.9
2012-08-25 01:44:24	27.639	5.55	84.6	52	32.8
2012-08-25 02:44:24	27.861	5.52	84.6	52	33
2012-08-25 03:44:24	27.75	5.5	84	52.1	33
2012-08-25 04:44:24	27.75	5.6	85.5	51.8	32.9
2012-08-25 05:44:24	27.6945	5.53	84.3	51.9	32.8
2012-08-25 06:44:24	27.75	5.56	84.9	51.8	33
2012-08-25 07:44:24	27.861	5.57	85.2	52.2	33
2012-08-25 08:44:24	27.639	5.51	84	51.9	32.9
2012-08-25 09:44:24	27.8055	5.59	85.5	51.8	32.9
2012-08-25 10:44:24	27.639	5.57	84.9	51.9	32.9
2012-08-25 11:44:24	27.75	5.63	86.1	51.9	33
2012-08-25 12:44:24	27.8055	5.65	86.4	52.1	33
2012-08-25 13:44:24	27.75	5.58	85.2	52	32.9
2012-08-25 14:44:24	27.639	5.54	84.6	52.1	33
2012-08-25 15:44:24	27.639	5.55	84.6	51.9	32.9
2012-08-25 16:44:24	27.8055	5.57	85.2	52.1	33.1
2012-08-25 17:44:24	27.8055	5.61	85.8	52.1	33
2012-08-25 18:44:24	27.75	5.62	85.8	51.9	33
2012-08-25 19:44:24	27.6945	5.69	86.8	51.9	32.9
2012-08-25 20:44:24	27.5835	5.76	87.7	52	32.9
2012-08-25 21:44:24	27.861	5.57	85.2	52	33
2012-08-25 22:44:24	27.8055	5.69	87.1	52.1	33
2012-08-25 23:44:24	27.6945	5.7	87.1	52	33
2012-08-26 00:44:24	27.75	5.82	88.9	51.9	32.9
2012-08-26 01:44:24	27.75	0	0	52.1	33
2012-08-26 02:44:24	27.861	0	0	52.2	33
2012-08-26 03:44:24	27.6945	0	0	52.3	33
2012-08-26 04:44:24	27.6945	0	0	52	33
2012-08-26 05:44:24	27.639	0	0	51.9	32.9
2012-08-26 06:44:24	27.861	0	0	51.9	33
2012-08-26 07:44:24	27.861	0	0	52.1	33.1
2012-08-26 08:44:24	27.75	0	0	51.9	33
2012-08-26 09:44:24	27.75	0	0	52	33
2012-08-26 10:44:24	27.639	0	0	52	32.9
2012-08-26 11:44:24	27.861	0	0	52.1	33.1
2012-08-26 12:44:24	24.864	0	0	0.0278	0
2012-08-26 13:44:24	25.1415	0	0	0.0419	0
2012-08-26 14:44:24	25.308	0	0	0.0478	0
2012-08-26 15:44:24	25.53	0	0	0.0514	0
2012-08-26 16:44:24	28.6935	5.35	83	52	32.8
2012-08-26 17:44:24	28.416	5.3	82	51.9	33.3
2012-08-26 18:44:24	28.083	5.31	81.7	51.8	33.1
2012-08-26 19:44:24	28.083	5.39	82.7	51.9	33
2012-08-26 20:44:24	27.9165	5.29	81	51.8	33
2012-08-26 21:44:24	27.9165	5.16	79.1	52	33
2012-08-26 22:44:24	27.861	5.12	78.4	51.9	33
2012-08-26 23:44:24	27.75	5.15	78.7	51.9	33
2012-08-27 00:44:24	27.861	5.34	81.7	52	32.9
2012-08-27 01:44:24	27.75	5.18	79.1	51.9	32.9
2012-08-27 02:44:24	27.75	5.18	79.1	51.9	32.9
2012-08-27 03:44:24	27.75	5.2	79.4	51.9	33
2012-08-27 04:44:24	27.75	5.35	81.7	52	32.9
2012-08-27 05:44:24	27.6945	5.35	81.7	52	32.9
2012-08-27 06:44:24	27.75	5.22	79.7	52.1	32.9
2012-08-27 07:44:24	27.9165	5.18	79.4	52.1	33
2012-08-27 08:44:24	27.8055	5.28	80.7	52.1	33
2012-08-27 09:44:24	27.8055	5.19	79.4	52.1	32.9
2012-08-27 10:44:24	27.6945	5.22	79.7	52	32.9
2012-08-27 11:44:24	27.861	5.2	79.7	52.1	33
2012-08-27 12:44:24	27.861	5.32	81.4	52.2	33
2012-08-27 13:44:24	27.8055	5.32	81.4	52.2	33
2012-08-27 14:44:24	27.639	5.31	81	52	33
2012-08-27 15:44:24	27.6945	5.33	81.4	52.1	33
2012-08-27 16:44:24	27.861	5.4	82.7	52.2	33.1
2012-08-27 17:44:24	27.75	5.3	81	52.1	33.1
2012-08-27 18:44:24	27.639	5.36	81.7	52.1	33
2012-08-27 19:44:24	27.5835	5.3	80.7	52	33
2012-08-27 20:44:24	27.75	5.34	81.7	52	33.1
2012-08-27 21:44:24	27.8055	5.32	81.4	52.2	33.1
2012-08-27 22:44:24	27.639	5.36	81.7	52.2	33
2012-09-12 09:46:28	27.6945	5.6	85.9	53.5	33.9
2012-09-12 10:46:28	27.639	5.65	86.6	53.4	33.8
2012-09-12 11:46:28	27.639	5.67	86.9	53.6	33.8
2012-09-12 12:46:28	27.972	5.63	86.9	53.5	34
2012-09-12 13:46:28	27.8055	5.65	86.9	53.5	33.9
2012-09-12 14:46:28	27.8055	5.72	87.9	53.5	33.9
2012-09-12 15:46:28	27.75	5.64	86.6	53.6	33.9
2012-09-12 16:46:28	27.8055	5.63	86.6	53.6	34
2012-09-12 17:46:28	27.75	5.68	87.2	53.4	34
2012-09-12 18:46:28	27.861	5.67	87.2	53.6	33.9
2012-09-12 19:46:28	27.8055	5.57	85.6	53.7	33.8
2012-09-12 20:46:28	27.5835	5.68	86.9	53.6	33.9
2012-09-12 21:46:28	27.8055	5.58	85.9	53.6	34
2012-09-12 22:46:28	27.75	5.64	86.6	53.7	34
2012-09-12 23:46:28	27.8055	5.63	86.6	53.5	33.9
2012-09-13 00:46:28	27.75	5.64	86.6	53.6	33.8
2012-09-13 01:46:28	27.861	5.58	85.9	53.5	34
2012-09-13 02:46:28	27.861	5.67	87.2	53.6	34
2012-09-13 03:46:28	27.75	5.76	88.5	53.6	33.9
2012-09-13 04:46:28	27.639	5.75	88.2	53.4	33.8
2012-09-13 05:46:28	27.861	5.63	86.6	53.6	33.9
2012-09-13 06:46:28	27.75	5.64	86.6	53.6	34
2012-09-13 07:46:28	27.75	5.66	86.9	53.5	33.9
2012-09-13 08:46:28	27.75	5.55	85.3	53.6	33.9
2012-09-13 09:46:28	27.5835	5.61	85.9	53.6	33.9
2012-09-13 10:46:28	27.9165	5.6	86.3	53.5	34
2012-09-13 11:46:28	27.861	5.67	87.2	53.6	33.9
2012-09-13 12:46:28	27.5835	5.48	84	53.5	33.8
2012-09-13 13:46:28	27.6945	5.28	81	53.6	34
2012-09-13 14:46:28	27.9165	5.37	82.7	53.6	34
2012-09-13 15:46:28	27.75	5.34	82	53.4	33.9
2012-09-13 16:46:28	27.639	5.29	81	53.6	33.8
2012-09-13 17:46:28	27.75	5.34	82	53.5	33.9
2012-09-13 18:46:28	27.75	5.32	81.7	53.5	34
2012-09-13 19:46:28	27.639	5.37	82.3	53.5	33.9
2012-09-13 20:46:28	27.639	5.43	83.3	53.5	33.9
2012-09-13 21:46:28	27.75	5.34	82	53.5	33.8
2012-09-13 22:46:28	27.8055	5.31	81.7	53.6	34
2012-09-13 23:46:28	27.8055	5.35	82.3	53.5	34
2012-09-14 00:46:28	27.6945	5.34	82	53.6	33.9
2012-09-14 01:46:28	27.6945	5.35	82	53.5	33.8
2012-09-14 02:46:28	27.6945	5.41	83	53.5	34
2012-09-14 03:46:28	27.8055	5.46	84	53.5	34
2012-09-14 04:46:28	27.6945	5.51	84.6	53.6	33.9
2012-09-14 05:46:28	27.639	5.56	85.3	53.5	33.9
2012-09-14 06:46:28	27.75	5.47	84	53.7	33.9
2012-09-14 07:46:28	27.861	5.46	84	53.7	34
2012-09-14 08:46:28	27.6945	5.45	83.6	53.5	33.9
2012-09-14 09:46:28	27.6945	5.56	85.3	53.6	33.8
2012-09-14 10:46:28	27.6945	5.48	84	53.4	33.8
2012-09-14 11:46:28	27.75	5.55	85.3	53.7	34
2012-09-14 12:46:28	27.861	5.46	84	53.5	33.9
2012-09-14 13:46:28	27.75	5.55	85.3	53.5	33.9
2012-09-14 14:46:28	27.639	5.58	85.6	53.4	33.8
2012-09-14 15:46:28	27.528	5.6	85.6	53.7	33.8
2012-09-14 16:46:28	27.75	5.59	85.9	53.6	34
2012-09-14 17:46:28	27.861	5.58	85.9	53.4	33.9
2012-09-14 18:46:28	27.6945	5.6	85.9	53.6	33.9
2012-09-14 19:46:28	27.75	5.66	86.9	53.7	33.8
2012-09-14 20:46:28	27.75	5.59	85.9	53.5	34
2012-09-14 21:46:28	27.861	5.63	86.6	53.7	34
2012-09-14 22:46:28	27.639	5.56	85.3	53.4	33.9
2012-09-14 23:46:28	27.639	5.73	87.9	53.6	33.9
2012-09-15 00:46:28	27.639	5.74	87.9	53.6	33.9
2012-09-15 01:46:28	27.9165	5.49	84.6	53.5	34
2012-09-15 02:46:28	27.6945	5.51	84.6	53.5	34
2012-09-15 03:46:28	27.8055	5.65	86.9	53.7	33.9
2012-09-15 04:46:28	27.75	5.45	83.6	53.5	33.8
2012-09-15 05:46:28	27.9165	5.41	83.3	53.6	34
2012-09-15 06:46:28	27.8055	5.44	83.6	53.5	34
2012-09-15 07:46:28	27.861	5.58	85.9	53.6	33.9
2012-09-15 08:46:28	27.639	5.56	85.3	53.6	33.9
2012-09-15 09:46:28	27.75	5.62	86.3	53.6	33.9
2012-09-15 10:46:28	27.861	5.56	85.6	53.6	34
2012-09-15 11:46:28	27.6945	5.56	85.3	53.6	34
2012-09-15 12:46:28	27.75	5.48	84	53.4	33.9
2012-09-15 13:46:28	27.75	5.56	85.3	53.6	33.9
2012-09-15 14:46:28	27.75	5.53	84.9	53.5	34
2012-09-15 15:46:28	27.75	5.59	85.9	53.7	34
2012-09-15 16:46:28	27.6945	5.56	85.3	53.5	33.9
2012-09-15 17:46:28	27.639	5.63	86.3	53.6	33.9
2012-09-15 18:46:28	27.6945	5.64	86.6	53.6	34
2012-09-15 19:46:28	27.8055	5.58	85.9	53.6	34
2012-09-15 20:46:28	27.639	5.52	84.6	53.5	34
2012-09-15 21:46:28	27.75	5.72	87.9	53.6	33.9
2012-09-15 22:46:28	27.639	5.78	88.5	53.6	33.8
2012-09-15 23:46:28	27.861	5.61	86.3	53.6	34
2012-09-16 00:46:28	27.861	5.67	87.2	53.6	34
2012-09-16 01:46:28	27.639	5.69	87.2	53.7	33.9
2012-09-16 02:46:28	27.639	5.8	88.9	53.6	33.9
2012-09-16 03:46:28	27.861	5.79	89.2	53.7	34
2012-09-16 04:46:28	27.6945	5.73	87.9	53.7	34
2012-09-16 05:46:28	27.861	5.63	86.6	53.6	34
2012-09-16 06:46:28	27.75	5.62	86.3	53.7	33.9
2012-09-16 07:46:28	27.8055	5.67	87.2	53.7	34
2012-09-16 08:46:28	27.75	5.7	87.6	53.7	34
2012-09-16 09:46:28	27.6945	5.71	87.6	53.7	34
2012-09-16 10:46:28	27.75	5.66	86.9	53.7	34
2012-09-16 11:46:28	27.639	5.73	87.9	53.7	34
2012-09-16 12:46:28	27.8055	5.61	86.3	53.6	34
2012-09-16 13:46:28	27.75	5.66	86.9	53.6	34
2012-09-16 14:46:28	27.639	5.6	85.9	53.7	34
2012-09-16 15:46:28	27.5835	5.5	84.3	53.5	33.9
2012-09-16 16:46:28	27.75	5.46	84	53.6	34.1
2012-09-16 17:46:28	27.8055	5.46	84	53.7	34
2012-09-16 18:46:28	27.75	5.47	84	53.8	34
2012-09-16 19:46:28	27.639	5.48	84	53.7	34
2012-09-16 20:46:28	27.8055	5.37	82.7	53.7	34.1
2012-09-16 21:46:28	27.861	5.4	83.3	53.7	34.1
2012-09-16 22:46:28	27.639	5.52	84.6	53.7	34
2012-09-16 23:46:28	27.8055	5.42	83.3	53.7	34
2012-09-17 00:46:28	27.639	5.5	84.3	53.8	34
2012-09-17 01:46:28	27.972	5.46	84	53.7	34.1
2012-09-17 02:46:28	27.75	5.44	83.6	53.8	34.1
2012-09-17 03:46:28	27.639	5.5	84.3	53.7	34
2012-09-17 04:46:28	27.639	5.6	85.9	53.8	34
2012-09-17 05:46:28	27.6945	5.63	86.6	53.8	34.2
2012-09-17 06:46:28	27.9165	5.38	83	53.7	34.1
2012-09-17 07:46:28	27.8055	5.5	84.6	53.8	34
2012-09-17 08:46:28	27.6945	5.43	83.3	53.9	34
2012-09-17 09:46:28	27.75	5.53	84.9	53.9	34.1
2012-09-17 10:46:28	27.861	5.26	81	53.8	34.2
2012-09-17 11:46:28	27.861	5.47	84.3	53.7	34.1
2012-09-17 12:46:28	27.75	5.59	85.9	53.9	34
2012-09-17 13:46:28	27.8055	5.31	81.7	53.8	34.1
2012-09-17 14:46:28	27.8055	5.37	82.7	53.9	34.1
2012-09-17 15:46:28	27.639	4.99	76.1	52.3	33.1
2012-09-17 16:46:28	27.9165	5.11	78.4	52.4	33.3
2012-09-17 17:46:28	27.75	5.12	78.4	52.5	33.3
2012-09-17 18:46:28	27.8055	5.18	79.4	52.4	33.2
2012-09-17 19:46:28	27.861	5.33	81.7	52.5	33.2
2012-09-17 20:46:28	27.5835	5.31	81	52.3	33.2
2012-09-17 21:46:28	27.528	5.51	84	52.3	33.1
2012-09-17 22:46:28	27.3615	5.4	82.3	52.4	33.8
2012-09-17 23:46:28	27.306	5.56	84.6	52.3	33.6
2012-09-18 00:46:28	27.1395	5.51	83.6	52.4	33.5
2012-09-18 01:46:28	26.9175	5.45	82.3	52.3	33.4
2012-09-18 02:46:28	26.751	5.55	83.6	52.3	33.3
2012-09-18 03:46:28	26.64	5.68	85.6	52.4	33.8
2012-09-18 04:46:28	26.418	5.62	84	52.2	33.8
2012-09-18 05:46:28	26.307	5.67	84.9	52.3	33.6
2012-09-18 06:46:28	26.0295	5.65	84	52.1	33.2
2012-09-18 07:46:28	25.863	5.53	82	52.1	33.1
2012-09-18 08:46:28	25.974	5.74	85.3	52.3	33.1
2012-09-19	26.3
2012-09-20	27.8
2012-09-21	27.6
2012-09-22	27.7
2012-09-23	27.8
2012-09-24	27.8
2012-09-25	27.9
2012-09-26	27.8
2012-09-27	27.7
2012-09-28	27.9
2012-09-29	27.7
2012-09-30	27.8
2012-10-01	27.7
2012-10-02
2012-10-03 09:48:28	27.6945	5.32	81.4	52.9	33.5
2012-10-03 10:48:28	27.75	5.35	82	53	33.6
2012-10-03 11:48:28	27.861	5.3	81.4	53	33.6
2012-10-03 12:48:28	27.6945	5.23	80	52.9	33.5
2012-10-03 13:48:28	27.3615	5.1	77.4	52.5	33.1
2012-10-03 14:48:28	27.861	4.86	74.5	52.5	33.3
2012-10-03 15:48:28	27.8055	5.12	78.4	52.3	33.3
2012-10-03 16:48:28	27.75	4.82	73.8	52.4	33.3
2012-10-03 17:48:28	27.861	4.71	72.2	52.4	33.2
2012-10-03 18:48:28	27.8055	4.74	72.5	52.4	33.2
2012-10-03 19:48:28	27.6945	4.91	75.1	52.4	33.2
2012-10-03 20:48:28	27.417	5.24	79.7	52.4	33.8
2012-10-03 21:48:28	27.4725	5.35	81.7	52.5	33.7
2012-10-03 22:48:28	27.1395	5.38	81.7	52.5	33.6
2012-10-03 23:48:28	27.0285	5.52	83.6	52.3	33.5
2012-10-04 00:48:28	26.9175	5.5	83	52.4	33.3
2012-10-04 01:48:28	26.6955	5.47	82.3	52.4	33.3
2012-10-04 02:48:28	26.5845	5.43	81.4	52.3	33.1
2012-10-04 03:48:28	26.2515	5.57	83.3	52.3	33.7
2012-10-04 04:48:28	26.2515	5.56	83	52.3	33.2
2012-10-04 05:48:28	25.9185	5.7	84.6	52.3	33.2
2012-10-04 06:48:28	25.8075	5.59	82.7	52.2	33.1
2012-10-04 07:48:28	25.8075	5.65	83.6	52.3	33
2012-10-04 08:48:28	25.6965	5.75	84.9	52.3	33
2012-10-04 09:48:28	25.8075	5.63	83.3	52.3	33.1
2012-10-04 10:48:28	25.974	5.76	85.6	52.2	33.2
2012-10-04 11:48:28	26.196	5.55	83	52.3	33.6
2012-10-04 12:48:28	26.307	5.36	80.4	52.3	33.7
2012-10-04 13:48:28	26.418	5.4	80.7	52.3	33.8
2012-10-04 14:48:28	26.64	5.37	80.7	52.4	33.3
2012-10-04 15:48:28	26.973	5.29	80	52.5	33.4
2012-10-04 16:48:28	27.0285	5.28	80	52.4	33.6
2012-10-04 17:48:28	27.306	5.19	79.1	52.4	33.7
2012-10-04 18:48:28	27.306	5.3	80.7	52.5	33.8
2012-10-04 19:48:28	27.639	5.29	80.7	52.5	33.2
2012-10-04 20:48:28	27.861	5.16	79.1	52.5	33.2
2012-10-04 21:48:28	27.861	5.22	80	52.4	33.3
2012-10-04 22:48:28	27.861	5.25	80.4	52.4	33.3
2012-10-04 23:48:28	27.6945	5.23	80	52.5	33.2
2012-10-05 00:48:28	27.8055	5.17	79.1	52.4	33.2
2012-10-05 01:48:28	27.75	5.27	80.7	52.4	33.3
2012-10-05 02:48:28	27.8055	5.27	80.7	52.5	33.3
2012-10-05 03:48:28	27.75	5.17	79.1	52.4	33.2
2012-10-05 04:48:28	27.5835	5.14	78.4	52.5	33.2
2012-10-05 05:48:28	27.75	5.12	78.4	52.4	33.3
2012-10-05 06:48:28	27.861	5.16	79.1	52.4	33.3
2012-10-05 07:48:28	27.75	5.23	80	52.5	33.2
2012-10-05 08:48:28	27.5835	5.22	79.7	52.6	33.2
2012-10-05 09:48:28	27.639	5.15	78.7	52.6	33.2
2012-10-05 10:48:28	27.9165	5.15	79.1	52.5	33.3
2012-10-05 11:48:28	27.6945	5.13	78.4	52.5	33.3
2012-10-05 12:48:28	27.8055	5.17	79.1	52.4	33.2
2012-10-05 13:48:28	27.5835	5.36	81.7	52.5	33.2
2012-10-05 14:48:28	27.861	5.37	82.3	52.5	33.3
2012-10-05 15:48:28	27.75	5.1	78.1	52.4	33.3
2012-10-05 16:48:28	27.8055	5.16	79.1	52.5	33.3
2012-10-05 17:48:28	27.5835	5.34	81.4	52.6	33.2
2012-10-05 18:48:28	27.75	5.28	80.7	52.5	33.2
2012-10-05 19:48:28	27.8055	5.33	81.7	52.6	33.3
2012-10-05 20:48:28	27.75	5.29	81	52.5	33.3
2012-10-05 21:48:28	27.8055	5.22	80	52.5	33.3
2012-10-05 22:48:28	27.5835	5.53	84.3	52.5	33.2
2012-10-05 23:48:28	27.6945	5.49	84	52.6	33.3
2012-10-06 00:48:28	27.861	5.35	82	52.5	33.3
2012-10-06 01:48:28	27.639	5.3	81	52.4	33.3
2012-10-06 02:48:28	27.639	5.29	80.7	52.5	33.2
2012-10-06 03:48:28	27.75	5.38	82.3	52.4	33.3
2012-10-06 04:48:28	27.9165	5.39	82.7	52.6	33.3
2012-10-06 05:48:28	27.639	5.37	82	52.6	33.3
2012-10-06 06:48:28	27.6945	5.23	80	52.4	33.2
2012-10-06 07:48:28	27.639	5.42	82.7	52.5	33.2
2012-10-06 08:48:28	27.8055	5.33	81.7	52.4	33.3
2012-10-06 09:48:28	27.861	5.43	83.3	52.6	33.4
2012-10-06 10:48:28	27.6945	5.32	81.4	52.5	33.3
2012-10-06 11:48:28	27.6945	5.35	81.7	52.5	33.2
2012-10-06 12:48:28	27.6945	5.37	82	52.5	33.2
2012-10-06 13:48:28	27.75	5.4	82.7	52.5	33.4
2012-10-06 14:48:28	27.8055	5.31	81.4	52.5	33.3
2012-10-06 15:48:28	27.75	5.25	80.4	52.5	33.3
2012-10-06 16:48:28	27.5835	5.44	83	52.6	33.2
2012-10-06 17:48:28	27.75	5.4	82.7	52.5	33.3
2012-10-06 18:48:28	27.861	5.51	84.6	52.6	33.4
2012-10-06 19:48:28	27.6945	5.43	83	52.5	33.3
2012-10-06 20:48:28	27.639	5.45	83.3	52.6	33.3
2012-10-06 21:48:28	27.639	5.5	84	52.5	33.2
2012-10-06 22:48:28	27.9165	5.39	82.7	52.5	33.3
2012-10-06 23:48:28	27.861	5.43	83.3	52.5	33.4
2012-10-07 00:48:28	27.639	5.37	82	52.5	33.3
2012-10-07 01:48:28	27.75	5.3	81	52.5	33.2
2012-10-07 02:48:28	27.8055	5.31	81.4	52.6	33.3
2012-10-07 03:48:28	27.8055	5.4	82.7	52.4	33.4
2012-10-07 04:48:28	27.861	5.43	83.3	52.6	33.3
2012-10-07 05:48:28	27.639	5.5	84	52.6	33.3
2012-10-07 06:48:28	27.75	5.42	83	52.5	33.3
2012-10-07 07:48:28	27.861	5.33	81.7	52.5	33.4
2012-10-07 08:48:28	27.75	5.25	80.4	52.6	33.3
2012-10-07 09:48:28	27.8055	5.27	80.7	52.5	33.3
2012-10-07 10:48:28	27.8055	5.22	79.7	52.5	33.2
2012-10-07 11:48:28	27.861	5.28	81	52.5	33.4
2012-10-08	27.8
2012-10-09	26
2012-10-10 09:49:07	26.085	5.4	80.4	52.3	33.2
2012-10-10 10:49:07	26.085	5.16	76.8	52.2	33.2
2012-10-10 11:49:07	26.196	5.24	78.4	52.3	33.7
2012-10-10 12:49:07	26.64	5.22	78.4	52.3	33.2
2012-10-10 13:49:07	26.862	5.2	78.4	52.3	33.3
2012-10-10 14:49:07	26.973	5.21	79.1	52.3	33.5
2012-10-10 15:49:07	27.195	5.09	77.4	52.4	33.6
2012-10-10 16:49:07	27.306	5.06	76.8	52.4	33
2012-10-10 17:49:07	27.5835	5.04	76.8	52.5	33.1
2012-10-10 18:49:07	27.75	5.02	76.8	52.5	33.2
2012-10-10 19:49:07	27.75	4.97	76.1	52.4	33.3
2012-10-10 20:49:07	27.8055	4.87	74.5	52.4	33.2
2012-10-10 21:49:07	27.6945	4.98	76.1	52.4	33.2
2012-10-10 22:49:07	27.6945	5.05	77.1	52.4	33.2
2012-10-10 23:49:07	27.75	4.97	76.1	52.4	33.3
2012-10-11 00:49:07	27.8055	5.06	77.4	52.5	33.2
2012-10-11 01:49:07	27.639	5.13	78.4	52.4	33.1
2012-10-11 02:49:07	27.8055	5.08	77.8	52.4	33.2
2012-10-11 03:49:07	27.75	5.15	78.7	52.4	33.3
2012-10-11 04:49:07	27.6945	5.05	77.1	52.4	33.2
2012-10-11 05:49:07	27.75	5.02	76.8	52.4	33.2
2012-10-11 06:49:07	27.75	5	76.5	52.4	33.2
2012-10-11 07:49:07	27.9165	4.98	76.5	52.3	33.3
2012-10-11 08:49:07	27.861	4.95	75.8	52.3	33.2
2012-10-11 09:49:07	27.8055	5.02	76.8	52.4	33.2
2012-10-11 10:49:07	27.8055	4.97	76.1	52.4	33.2
2012-10-11 11:49:07	27.861	5.05	77.4	52.5	33.3
2012-10-11 12:49:07	27.8055	5.01	76.8	52.5	33.2
2012-10-11 13:49:07	27.75	4.64	70.9	52.4	33.2
2012-10-11 14:49:07	27.6945	4.66	71.2	52.4	33.2
2012-10-11 15:49:07	27.861	4.62	70.9	52.5	33.3
2012-10-11 16:49:07	27.75	4.53	69.3	52.4	33.2
2012-10-11 17:49:07	27.528	4.55	69.3	52.4	33.1
2012-10-11 18:49:07	27.639	4.64	70.9	52.4	33.2
2012-10-11 19:49:07	27.9165	4.57	70.2	52.4	33.3
2012-10-11 20:49:07	27.75	4.7	71.9	52.4	33.2
2012-10-11 21:49:07	27.5835	4.8	73.2	52.5	33.2
2012-10-11 22:49:07	27.639	4.69	71.6	52.4	33.2
2012-10-11 23:49:07	27.8055	4.8	73.5	52.6	33.3
2012-10-12 00:49:07	27.861	4.76	72.9	52.5	33.3
2012-10-12 01:49:07	27.6945	4.72	72.2	52.4	33.2
2012-10-12 02:49:07	27.639	4.86	74.2	52.4	33.2
2012-10-12 03:49:07	27.75	4.74	72.5	52.4	33.2
2012-10-12 04:49:07	27.9165	4.77	73.2	52.5	33.3
2012-10-12 05:49:07	27.6945	4.83	73.8	52.5	33.2
2012-10-12 06:49:07	27.75	4.89	74.8	52.6	33.2
2012-10-12 07:49:07	27.8055	4.89	74.8	52.5	33.2
2012-10-12 08:49:07	27.9165	4.83	74.2	52.4	33.3
2012-10-12 09:49:07	27.6945	5	76.5	52.6	33.3
2012-10-12 10:49:07	27.75	4.94	75.5	52.5	33.2
2012-10-12 11:49:07	27.6945	4.91	75.1	52.6	33.2
2012-10-12 12:49:07	27.8055	4.88	74.8	52.5	33.3
2012-10-12 13:49:07	27.8055	4.82	73.8	52.4	33.3
2012-10-12 14:49:07	27.639	4.9	74.8	52.6	33.3
2012-10-12 15:49:07	27.528	4.93	75.1	52.4	33.2
2012-10-12 16:49:07	27.75	4.95	75.8	52.5	33.3
2012-10-12 17:49:07	27.861	4.92	75.5	52.5	33.4
2012-10-12 18:49:07	27.861	4.96	76.1	52.5	33.3
2012-10-12 19:49:07	27.6945	4.96	75.8	52.5	33.2
2012-10-12 20:49:07	27.8055	5.02	76.8	52.7	33.2
2012-10-12 21:49:07	27.6945	5.02	76.8	52.6	33.4
2012-10-12 22:49:07	27.861	5.03	77.1	52.6	33.3
2012-10-12 23:49:07	27.639	5.07	77.4	52.6	33.2
2012-10-13 00:49:07	27.6945	5.03	76.8	52.5	33.2
2012-10-13 01:49:07	27.8055	5.01	76.8	52.5	33.3
2012-10-13 02:49:07	27.75	4.95	75.8	52.5	33.4
2012-10-13 03:49:07	27.639	5.01	76.5	52.6	33.3
2012-10-13 04:49:07	27.5835	4.99	76.1	52.5	33.3
2012-10-13 05:49:07	27.861	4.96	76.1	52.6	33.3
2012-10-13 06:49:07	27.75	5.02	76.8	52.7	33.4
2012-10-13 07:49:07	27.861	4.9	75.1	52.4	33.3
2012-10-13 08:49:07	27.8055	4.97	76.1	52.6	33.3
2012-10-13 09:49:07	27.639	4.98	76.1	52.5	33.2
2012-10-13 10:49:07	27.6945	4.95	75.8	52.6	33.4
2012-10-13 11:49:07	27.75	4.95	75.8	52.5	33.4
2012-10-13 12:49:07	27.75	4.93	75.5	52.5	33.3
2012-10-13 13:49:07	27.6945	4.96	75.8	52.5	33.3
2012-10-13 14:49:07	27.6945	4.91	75.1	52.6	33.4
2012-10-13 15:49:07	27.861	4.79	73.5	52.7	33.4
2012-10-13 16:49:07	27.6945	4.85	74.2	52.8	33.4
2012-10-13 17:49:07	27.6945	4.91	75.1	52.6	33.4
2012-10-13 18:49:07	27.6945	4.91	75.1	52.7	33.4
2012-10-13 19:49:07	27.861	4.9	75.1	52.8	33.4
2012-10-13 20:49:07	27.861	4.86	74.5	52.7	33.4
2012-10-13 21:49:07	27.639	4.98	76.1	52.6	33.4
2012-10-13 22:49:07	27.5835	4.9	74.8	52.7	33.3
2012-10-13 23:49:07	27.861	4.86	74.5	52.6	33.4
2012-10-14 00:49:07	27.861	4.88	74.8	52.7	33.4
2012-10-14 01:49:07	27.639	4.87	74.5	52.7	33.4
2012-10-14 02:49:07	27.6945	4.91	75.1	52.7	33.3
2012-10-14 03:49:07	27.861	4.84	74.2	52.8	33.4
2012-10-14 04:49:07	27.861	4.81	73.8	52.6	33.4
2012-10-14 05:49:07	27.6945	4.93	75.5	52.8	33.4
2012-10-14 06:49:07	27.639	4.85	74.2	52.6	33.3
2012-10-14 07:49:07	27.639	4.85	74.2	52.6	33.4
2012-10-14 08:49:07	27.8055	4.81	73.8	52.7	33.5
2012-10-14 09:49:07	27.75	4.9	75.1	52.7	33.4
2012-10-14 10:49:07	27.639	4.87	74.5	52.6	33.4
2012-10-14 11:49:07	27.861	4.86	74.5	52.6	33.4
2012-10-14 12:49:07	27.75	4.88	74.8	52.8	33.5
2012-10-14 13:49:07	27.75	4.88	74.8	52.7	33.4
2012-10-14 14:49:07	27.6945	4.72	72.2	52.8	33.4
2012-10-14 15:49:07	27.639	4.51	68.9	52.8	33.4
2012-10-14 16:49:07	27.972	4.56	70.2	52.7	33.5
2012-10-14 17:49:07	27.6945	4.46	68.3	52.6	33.5
2012-10-14 18:49:07	27.5835	4.62	70.6	52.8	33.4
2012-10-14 19:49:07	27.75	4.57	69.9	52.7	33.4
2012-10-14 20:49:07	27.8055	4.58	70.2	52.8	33.5
2012-10-14 21:49:07	27.861	4.6	70.6	52.9	33.5
2012-10-14 22:49:07	27.75	4.65	71.2	52.8	33.4
2012-10-14 23:49:07	27.75	4.63	70.9	52.8	33.4
2012-10-15 00:49:07	27.75	4.62	70.9	52.8	33.6
2012-10-15 01:49:07	27.75	4.63	70.9	52.9	33.5
2012-10-15 02:49:07	27.639	4.65	71.2	52.8	33.5
2012-10-15 03:49:07	27.8055	4.58	70.2	52.8	33.4
2012-10-15 04:49:07	27.9165	4.66	71.6	52.9	33.5
2012-10-15 05:49:07	27.861	4.53	69.6	52.7	33.5
2012-10-15 06:49:07	27.639	4.57	69.9	52.9	33.5
2012-10-15 07:49:07	27.8055	4.52	69.3	52.8	33.5
2012-10-15 08:49:07	27.861	4.43	68	52.9	33.6
2012-10-15 09:49:07	27.75	4.44	68	52.8	33.5
2012-10-15 10:49:07	27.639	4.5	68.9	52.9	33.4
2012-10-15 11:49:07	27.6945	4.48	68.6	52.9	33.5
2012-10-15 12:49:07	26.3625	4.27	64	52.2	33.6
2012-10-15 13:49:07	26.529	4.8	71.9	52.3	33.1
2012-10-15 14:49:07	26.862	4.83	72.9	52.3	33.3
2012-10-15 15:49:07	27.1395	4.86	73.8	52.3	33.5
2012-10-15 16:49:07	27.306	4.85	73.8	52.4	33.7
2012-10-15 17:49:07	27.528	4.64	70.6	52.2	33
2012-10-15 18:49:07	27.75	4.7	71.9	52.4	33.2
2012-10-15 19:49:07	27.75	4.85	74.2	52.5	33.2
2012-10-15 20:49:07	27.639	4.71	71.9	52.3	33.2
2012-10-15 21:49:07	27.639	4.86	74.2	52.4	33.1
2012-10-15 22:49:07	27.75	4.74	72.5	52.4	33.2
2012-10-15 23:49:07	27.861	4.76	72.9	52.3	33.2
2012-10-16 00:49:07	27.75	4.79	73.2	52.3	33.2
2012-10-16 01:49:07	27.639	4.9	74.8	52.3	33.1
2012-10-16 02:49:07	27.75	4.87	74.5	52.5	33.2
2012-10-16 03:49:07	27.861	4.88	74.8	52.5	33.2
2012-10-16 04:49:07	27.639	4.88	74.5	52.3	33.2
2012-10-16 05:49:07	27.5835	4.92	75.1	52.4	33.1
2012-10-16 06:49:07	27.861	4.76	72.9	52.4	33.2
2012-10-16 07:49:07	27.9165	4.62	70.9	52.3	33.3
2012-10-16 08:49:07	27.75	4.68	71.6	52.5	33.2
2012-10-16 09:49:07	27.639	4.77	72.9	52.4	33.2
2012-10-16 10:49:07	27.75	4.72	72.2	52.3	33.2
2012-10-16 11:49:07	27.75	4.78	73.2	52.4	33.2
2012-10-16 12:49:07	27.75	4.87	74.5	52.3	33.2
2012-10-16 13:49:07	27.8055	4.87	74.5	52.4	33.2
2012-10-16 14:49:07	27.639	4.86	74.2	52.5	33.2
2012-10-16 15:49:07	27.861	4.77	73.2	52.4	33.3
2012-10-16 16:49:07	27.75	4.72	72.2	52.4	33.2
2012-10-16 17:49:07	27.75	4.77	72.9	52.4	33.2
2012-10-16 18:49:07	27.8055	4.85	74.2	52.4	33.2
2012-10-16 19:49:07	27.8055	4.65	71.2	52.4	33.2
2012-10-16 20:49:07	27.8055	4.7	71.9	52.4	33.2
2012-10-16 21:49:07	27.75	4.79	73.2	52.3	33.2
2012-10-16 22:49:07	27.6945	4.74	72.5	52.4	33.2
2012-10-16 23:49:07	27.6945	4.77	72.9	52.4	33.1
2012-10-17 00:49:07	27.639	4.69	71.6	52.3	33.1
2012-10-17 01:49:07	27.639	4.67	71.2	52.3	33.1
2012-10-17 02:49:07	27.528	4.57	69.6	52.3	33
2012-10-17 03:49:07	27.528	4.49	68.3	52.3	33
2012-10-17 04:49:07	27.4725	4.6	69.9	52.4	33
2012-10-17 05:49:07	27.4725	4.58	69.6	52.3	33
2012-10-17 06:49:07	27.417	4.51	68.6	52.4	33.7
2012-10-17 09:49:44	27.417	4.84	73.8	52.3	33.7
2012-10-17 10:49:44	27.1395	4.89	74.2	52.1	33.5
2012-10-17 11:49:44	26.751	4.9	73.8	52.4	33.3
2012-10-17 12:49:44	26.307	5.06	75.8	52.3	33.7
2012-10-17 13:49:44	25.9185	5.06	75.1	52.2	33.1
2012-10-17 14:49:44	25.641	5.29	77.8	52.2	32.9
2012-10-17 15:49:44	25.2525	5.28	77.4	52.3	33.3
2012-10-17 16:49:44	25.086	5.29	77.4	52.2	33.2
2012-10-17 17:49:44	25.086	5.32	77.8	52.2	33.2
2012-10-17 18:49:44	25.0305	5.39	78.7	52.3	33.2
2012-10-17 19:49:44	25.0305	5.36	78.4	52.2	33.2
2012-10-17 20:49:44	25.086	5.41	79.1	52.2	33.1
2012-10-17 21:49:44	25.0305	5.45	79.7	52.1	33.1
2012-10-17 22:49:44	25.0305	5.44	79.4	52.2	33.1
2012-10-17 23:49:44	25.086	5.44	79.4	52.2	33.1
2012-10-18 00:49:44	25.0305	5.37	78.4	52.2	33.1
2012-10-18 01:49:44	24.864	5.44	79.4	52.1	33.1
2012-10-18 02:49:44	24.975	5.39	78.7	52.1	33.1
2012-10-18 03:49:44	24.9195	5.45	79.4	52.2	33.1
2012-10-18 04:49:44	24.753	5.49	80	52.2	33.1
2012-10-18 05:49:44	24.864	5.44	79.4	52.1	33.1
2012-10-18 06:49:44	24.864	5.41	79.1	52	33.1
2012-10-18 07:49:44	24.9195	5.49	80	52.2	33.1
2012-10-18 08:49:44	24.864	5.43	79.1	52.2	33.1
2012-10-18 09:49:44	24.9195	5.48	79.7	52.2	33.1
2012-10-18 10:49:44	25.0305	5.37	78.4	52.1	33.1
2012-10-18 11:49:44	24.9195	5.65	82.3	52.2	33.1
2012-10-18 12:49:44	24.753	5.21	76.1	52.1	33.1
2012-10-18 13:49:44	25.0305	5.26	76.8	52.1	33.1
2012-10-18 14:49:44	24.9195	5.31	77.4	52.2	33.1
2012-10-18 15:49:44	24.975	5.28	77.1	52.1	33.1
2012-10-18 16:49:44	24.975	5.26	76.5	52.3	33.1
2012-10-18 17:49:44	24.9195	5.26	76.8	52.1	33.1
2012-10-18 18:49:44	25.0305	5.17	75.5	52	33.1
2012-10-18 19:49:44	24.9195	5.29	77.1	52.2	33.1
2012-10-18 20:49:44	24.9195	5.14	74.8	52.2	33.1
2012-10-18 21:49:44	24.975	5.33	77.8	52.2	33.1
2012-10-18 22:49:44	24.864	5.39	78.4	52.2	33.1
2012-10-18 23:49:44	24.9195	5.27	76.8	52.2	33.1
2012-10-19 00:49:44	24.9195	5.23	76.1	52.2	33.1
2012-10-19 01:49:44	24.9195	5.34	77.8	52.2	33.1
2012-10-19 02:49:44	24.9195	5.34	77.8	52.2	33.1
2012-10-19 03:49:44	24.9195	5.25	76.5	52.2	33.1
2012-10-19 04:49:44	24.864	5.28	76.8	52.2	33.1
2012-10-19 05:49:44	24.9195	5.29	77.1	52.2	33.1
2012-10-19 06:49:44	24.975	5.3	77.4	52.2	33.1
2012-10-19 07:49:44	24.975	5.39	78.7	52.2	33.1
2012-10-19 08:49:44	25.0305	5.36	78.1	52.2	33.1
2012-10-19 09:49:44	24.864	5.31	77.4	52.2	33.1
2012-10-19 10:49:44	24.975	5.39	78.4	52.2	33.1
2012-10-19 11:49:44	24.9195	5.31	77.4	52.3	33.1
2012-10-19 12:49:44	24.8085	5.49	80	52.2	33.1
2012-10-19 13:49:44	25.0305	5.3	77.4	52.2	33.1
2012-10-19 14:49:44	25.2525	5.31	78.1	52.2	33.3
2012-10-19 15:49:44	25.4745	5.26	77.4	52.2	32.9
2012-10-20	24.9
2012-10-21	24.9
2012-10-22	27.8
2012-10-23	27.8
2012-10-24 09:50:22	24.8085	5.26	76.5	52.1	33
2012-10-24 10:50:22	24.864	5.28	77.1	52	33
2012-10-24 11:50:22	24.864	5.32	77.4	52	33
2012-10-24 12:50:22	24.8085	5.33	77.4	52.1	33
2012-10-24 13:50:22	24.8085	5.42	78.7	52.1	33
2012-10-24 14:50:22	24.864	5.28	76.8	52.1	33
2012-10-24 15:50:22	24.8085	5.37	78.1	52.1	33
2012-10-24 16:50:22	24.753	5.37	78.1	52.1	33
2012-10-24 17:50:22	24.9195	5.27	76.8	52.2	33
2012-10-24 18:50:22	24.753	5.38	78.1	52.2	33
2012-10-25	24.8
2012-10-26	28
2012-10-27	27.9
2012-10-28	27.9
2012-10-29	27.6
2012-10-30	25
2012-10-31 09:50:58	24.9195	4.96	72.5	52.8	33.5
2012-10-31 10:50:58	24.975	4.94	72.2	52.8	33.5
2012-10-31 11:50:58	25.197	4.8	70.6	52.8	33.7
2012-10-31 12:50:58	25.4745	4.67	68.9	52.8	33.2
2012-10-31 13:50:58	25.8075	4.71	69.9	52.9	33.7
2012-10-31 14:50:58	26.1405	4.61	68.9	52.8	34
2012-10-31 15:50:58	26.529	4.53	68	52.7	33.5
2012-10-31 16:50:58	26.862	4.43	67	52.9	33.8
2012-10-31 17:50:58	27.195	4.44	67.6	52.9	34
2012-10-31 18:50:58	27.528	4.35	66.3	52.9	33.4
2012-10-31 19:50:58	27.861	4.31	66.3	53	33.7
2012-10-31 20:50:58	27.9165	4.48	68.9	53	33.7
2012-10-31 21:50:58	27.8055	4.28	65.7	53	33.7
2012-10-31 22:50:58	27.861	4.31	66.3	53	33.7
2012-10-31 23:50:58	27.861	4.38	67.3	52.9	33.7
2012-11-01 00:50:58	27.9165	4.38	67.3	53	33.7
2012-11-01 01:50:58	27.8055	4.45	68.3	53	33.6
2012-11-01 02:50:58	27.9165	4.46	68.6	53	33.7
2012-11-01 03:50:58	27.8055	4.47	68.6	53	33.6
2012-11-01 04:50:58	27.861	4.44	68.3	53	33.7
2012-11-01 05:50:58	27.8055	4.4	67.6	53	33.7
2012-11-01 06:50:58	27.9165	4.44	68.3	53	33.7
2012-11-01 07:50:58	27.8055	4.43	68	53	33.6
2012-11-01 08:50:58	27.9165	4.36	67	53	33.7
2012-11-01 09:50:58	27.861	4.34	66.7	53	33.6
2012-11-01 10:50:58	27.9165	4.36	67	53	33.7
2012-11-01 11:50:58	27.861	4.4	67.6	53	33.7
2012-11-01 12:50:58	27.9165	4.4	67.6	53	33.7
2012-11-01 13:50:58	27.528	4.47	68.3	53	33.5
2012-11-01 14:50:58	27.1395	4.51	68.6	52.9	34
2012-11-01 15:50:58	26.751	4.55	68.6	52.9	33.7
2012-11-01 16:50:58	26.4735	4.68	70.2	52.9	33.5
2012-11-01 17:50:58	26.196	4.71	70.6	53	34.1
2012-11-01 18:50:58	26.0295	4.77	71.2	52.8	33.9
2012-11-01 19:50:58	25.752	4.82	71.6	52.9	33.8
2012-11-01 20:50:58	25.5855	4.87	72.2	52.8	33.2
2012-11-01 21:50:58	25.3635	5.07	74.8	52.8	33.8
2012-11-01 22:50:58	25.0305	5.01	73.5	52.9	33.7
2012-11-01 23:50:58	24.9195	5.03	73.5	52.9	33.5
2012-11-02 00:50:58	24.642	5.02	72.9	52.8	33.4
2012-11-02 01:50:58	24.42	5.08	73.8	52.9	34
2012-11-02 02:50:58	24.198	5.13	74.2	52.8	33.9
2012-11-02 03:50:58	23.976	5.13	73.8	52.9	33.8
2012-11-02 04:50:58	24.087	5.12	73.8	52.9	33.7
2012-11-02 05:50:58	24.087	5.19	74.8	52.8	33.7
2012-11-02 06:50:58	23.9205	5.13	73.8	52.8	33.7
2012-11-02 07:50:58	23.976	5.27	75.8	52.8	33.7
2012-11-02 08:50:58	24.087	5.26	75.8	52.8	33.7
2012-11-02 09:50:58	23.976	5.25	75.5	52.9	33.7
2012-11-02 10:50:58	23.9205	5.25	75.5	53	33.7
2012-11-02 11:50:58	24.0315	5.31	76.5	52.7	33.7
2012-11-02 12:50:58	23.8095	5.17	74.2	52.9	33.7
2012-11-02 13:50:58	23.976	5.22	75.1	52.9	33.7
2012-11-02 14:50:58	23.8095	5.37	77.1	53	33.7
2012-11-02 15:50:58	23.9205	5.26	75.5	52.9	33.7
2012-11-02 16:50:58	23.9205	5.28	75.8	52.9	33.6
2012-11-02 17:50:58	23.865	5.28	75.8	52.8	33.6
2012-11-02 18:50:58	23.9205	5.23	75.1	52.8	33.6
2012-11-02 19:50:58	23.8095	5.27	75.5	52.9	33.6
2012-11-02 20:50:58	23.8095	5.33	76.5	52.9	33.6
2012-11-02 21:50:58	23.8095	5.38	77.1	52.9	33.6
2012-11-02 22:50:58	23.8095	5.45	78.1	53	33.6
2012-11-02 23:50:58	23.754	5.5	78.7	52.9	33.6
2012-11-03 00:50:58	23.754	5.36	76.8	53	33.6
2012-11-03 01:50:58	23.865	5.39	77.4	53	33.6
2012-11-03 02:50:58	23.754	5.56	79.7	52.9	33.6
2012-11-03 03:50:58	23.754	5.52	79.1	52.9	33.6
2012-11-03 04:50:58	23.754	5.54	79.4	52.9	33.6
2012-11-03 05:50:58	23.754	5.52	79.1	53	33.6
2012-11-03 06:50:58	23.6985	5.5	78.7	53.2	33.6
2012-11-03 07:50:58	23.6985	5.41	77.4	53	33.6
2012-11-03 08:50:58	23.8095	5.33	76.5	52.9	33.6
2012-11-03 09:50:58	23.6985	5.34	76.5	52.9	33.6
2012-11-03 10:50:58	23.5875	5.4	77.1	53.2	33.6
2012-11-03 11:50:58	23.643	5.46	78.1	53	33.6
2012-11-03 12:50:58	23.6985	5.34	76.5	53	33.6
2012-11-03 13:50:58	23.6985	5.39	77.1	53	33.6
2012-11-03 14:50:58	23.8095	5.31	76.1	52.9	33.6
2012-11-03 15:50:58	23.754	5.4	77.4	52.9	33.7
2012-11-03 16:50:58	23.8095	5.33	76.5	53	33.7
2012-11-03 17:50:58	23.754	5.38	77.1	53	33.7
2012-11-03 18:50:58	23.9205	5.29	76.1	53	33.7
2012-11-03 19:50:58	23.9205	5.36	77.1	52.9	33.7
2012-11-03 20:50:58	23.976	5.32	76.5	52.9	33.7
2012-11-03 21:50:58	23.865	5.44	78.1	52.9	33.7
2012-11-03 22:50:58	23.865	5.67	81.4	52.9	33.7
2012-11-03 23:50:58	23.8095	5.58	80	53	33.7
2012-11-04 00:50:58	23.8095	5.74	82.3	53	33.7
2012-11-04 01:50:58	23.865	5.64	81	52.9	33.7
2012-11-04 02:50:58	23.9205	5.54	79.7	52.9	33.7
2012-11-04 03:50:58	23.8095	5.67	81.4	53	33.7
2012-11-04 04:50:58	23.754	5.56	79.7	53	33.7
2012-11-04 05:50:58	23.8095	5.69	81.7	53	33.7
2012-11-04 06:50:58	23.8095	5.69	81.7	53	33.7
2012-11-04 07:50:58	23.6985	5.61	80.4	53.2	33.7
2012-11-04 08:50:58	23.8095	5.51	79.1	53	33.7
2012-11-04 09:50:58	23.8095	5.49	78.7	53	33.7
2012-11-04 10:50:58	23.754	5.54	79.4	53	33.7
2012-11-04 11:50:58	24.087	5.32	76.8	53	33.9
2012-11-04 12:50:58	24.531	5.25	76.1	53	33.4
2012-11-04 13:50:58	24.975	5.26	77.1	53	33.7
2012-11-04 14:50:58	24.864	5.04	73.5	53	33.6
2012-11-04 15:50:58	24.864	5	72.9	52.9	33.5
2012-11-04 16:50:58	24.864	4.9	71.6	53	33.6
2012-11-04 17:50:58	24.8085	4.86	70.9	53	33.5
2012-11-04 18:50:58	24.9195	4.96	72.5	53.2	33.7
2012-11-04 19:50:58	24.864	4.96	72.5	53	33.7
2012-11-04 20:50:58	24.864	4.97	72.5	53	33.6
2012-11-04 21:50:58	24.8085	5.11	74.5	53.2	33.6
2012-11-04 22:50:58	24.975	5.13	75.1	53	33.7
2012-11-04 23:50:58	24.9195	5.12	74.8	53.2	33.7
2012-11-05 00:50:58	24.864	4.96	72.5	53.2	33.7
2012-11-05 01:50:58	24.8085	4.96	72.5	53	33.7
2012-11-05 02:50:58	24.975	5.07	74.2	53.2	33.7
2012-11-05 03:50:58	24.9195	5.03	73.5	53.2	33.7
2012-11-05 04:50:58	24.864	4.96	72.5	53.2	33.7
2012-11-05 05:50:58	24.8085	5.09	74.2	53.2	33.6
2012-11-05 06:50:58	24.9195	4.75	69.6	53.2	33.7
2012-11-05 07:50:58	24.9195	4.83	70.6	53.2	33.7
2012-11-05 08:50:58	24.864	4.74	69.3	53.2	33.7
2012-11-05 09:50:58	24.8085	4.94	72.2	53.3	33.7
2012-11-05 10:50:58	24.9195	4.91	71.9	53	33.7
2012-11-05 11:50:58	24.9195	4.92	71.9	53.2	33.7
2012-11-05 12:50:58	22.644	5.31	74.5	52.7	33.4
2012-11-05 13:50:58	22.977	4.96	70.2	52.8	33.9
2012-11-05 14:50:58	23.3655	5.02	71.6	52.8	34.1
2012-11-05 15:50:58	23.6985	5.05	72.2	52.8	33.5
2012-11-06	24.9
2012-11-07 10:57:52	27.8055	4.23	65	53	33.7
2012-11-07 11:57:52	27.5835	4.36	66.7	53	33.6
2012-11-07 12:57:52	27.9165	4.23	65	53.2	33.7
2012-11-07 13:57:52	27.8055	4.36	67	53	33.7
2012-11-07 14:57:52	27.639	4.36	66.7	53	33.6
2012-11-07 15:57:52	27.861	4.3	66	53.2	33.7
2012-11-07 16:57:52	27.861	4.38	67.3	53	33.7
2012-11-07 17:57:52	27.639	4.57	69.9	53	33.6
2012-11-07 18:57:52	27.861	4.48	68.9	53	33.7
2012-11-07 19:57:52	27.639	4.42	67.6	53	33.7
2012-11-07 20:57:52	27.6945	4.46	68.3	53	33.6
2012-11-07 21:57:52	27.75	4.6	70.6	53.2	33.7
2012-11-07 22:57:52	27.861	4.48	68.9	53	33.7
2012-11-07 23:57:52	27.639	4.5	68.9	53	33.6
2012-11-08 00:57:52	27.8055	4.51	69.3	53.2	33.7
2012-11-08 01:57:52	27.75	4.69	71.9	53.2	33.7
2012-11-08 02:57:52	27.75	4.58	70.2	53.2	33.7
2012-11-08 03:57:52	27.8055	4.64	71.2	53.3	33.7
2012-11-08 04:57:52	27.6945	4.61	70.6	53	33.7
2012-11-08 05:57:52	27.75	4.71	72.2	53.2	33.7
2012-11-08 06:57:52	27.639	4.78	73.2	53.2	33.7
2012-11-08 07:57:52	27.861	4.48	68.9	53	33.7
2012-11-08 08:57:52	27.639	4.45	68.3	53.2	33.7
2012-11-08 09:57:52	27.75	4.47	68.6	53.2	33.7
2012-11-08 10:57:52	27.972	4.54	69.9	53.2	33.8
2012-11-08 11:57:52	27.417	4.59	70.2	53.2	34.2
2012-11-08 12:57:52	27.4725	4.39	67	53	33.5
2012-11-08 13:57:52	27.861	4.38	67.3	53.2	33.7
2012-11-08 14:57:52	27.75	4.39	67.3	53.2	33.7
2012-11-08 15:57:52	27.6945	4.61	70.6	53.3	33.7
2012-11-08 16:57:52	27.639	4.46	68.3	53	33.7
2012-11-08 17:57:52	27.6945	3.99	61.1	53.3	33.7
2012-11-08 18:57:52	27.75	4.37	67	53	33.7
2012-11-08 19:57:52	27.639	4.44	68	53.2	33.7
2012-11-08 20:57:52	27.8055	4.38	67.3	53.3	33.7
2012-11-08 21:57:52	27.75	4.69	71.9	53.2	33.7
2012-11-08 22:57:52	27.639	4.76	72.9	53.3	33.7
2012-11-08 23:57:52	27.9165	4.69	72.2	53.2	33.8
2012-11-09 00:57:52	27.861	4.53	69.6	53.2	33.7
2012-11-09 01:57:52	27.75	4.71	72.2	53.2	33.7
2012-11-09 02:57:52	27.8055	4.64	71.2	53.2	33.7
2012-11-09 03:57:52	27.6945	4.69	71.9	53	33.7
2012-11-09 04:57:52	27.639	4.8	73.5	53.3	33.7
2012-11-09 05:57:52	27.6945	4.8	73.5	53.3	33.7
2012-11-09 06:57:52	27.75	4.85	74.5	53.2	33.8
2012-11-09 07:57:52	27.6945	4.65	71.2	53.2	33.7
2012-11-09 08:57:52	27.6945	4.73	72.5	53	33.7
2012-11-09 09:57:52	27.75	4.62	70.9	53.4	33.8
2012-11-09 10:57:52	27.8055	4.6	70.6	53.2	33.7
2012-11-09 11:57:52	27.639	4.57	69.9	53.3	33.7
2012-11-09 12:57:52	27.75	4.56	69.9	53.2	33.7
2012-11-09 13:57:52	27.75	4.64	71.2	53.3	33.8
2012-11-09 14:57:52	27.6945	4.65	71.2	53.3	33.7
2012-11-09 15:57:52	27.6945	4.69	71.9	53.3	33.7
2012-11-09 16:57:52	27.861	4.61	70.9	53.4	33.8
2012-11-09 17:57:52	27.75	4.67	71.6	53.2	33.7
2012-11-09 18:57:52	27.639	4.68	71.6	53.4	33.7
2012-11-09 19:57:52	27.75	4.6	70.6	53.3	33.8
2012-11-09 20:57:52	27.9165	4.65	71.6	53.3	33.8
2012-11-09 21:57:52	27.639	4.87	74.5	53.2	33.7
2012-11-09 22:57:52	27.75	4.92	75.5	53.3	33.7
2012-11-09 23:57:52	27.8055	4.89	75.1	53.4	33.8
2012-11-10 00:57:52	27.75	4.79	73.5	53.2	33.7
2012-11-10 01:57:52	27.639	4.78	73.2	53.4	33.7
2012-11-10 02:57:52	27.861	4.85	74.5	53.3	33.8
2012-11-10 03:57:52	27.6945	4.86	74.5	53.3	33.8
2012-11-10 04:57:52	27.5835	4.87	74.5	53.3	33.7
2012-11-10 05:57:52	27.639	4.93	75.5	53.4	33.8
2012-11-10 06:57:52	27.9165	4.61	70.9	53.2	33.8
2012-11-10 07:57:52	27.639	4.76	72.9	53.2	33.7
2012-11-10 08:57:52	27.75	4.69	71.9	53.3	33.7
2012-11-10 09:57:52	27.861	4.8	73.8	53.4	33.8
2012-11-10 10:57:52	27.8055	4.89	75.1	53.2	33.8
2012-11-10 11:57:52	27.639	4.82	73.8	53.3	33.7
2012-11-10 12:57:52	27.8055	4.8	73.8	53.3	33.8
2012-11-10 13:57:52	27.8055	4.75	72.9	53.4	33.8
2012-11-10 14:57:52	27.861	4.61	70.9	53.4	33.8
2012-11-10 15:57:52	27.75	4.62	70.9	53.4	33.8
2012-11-10 16:57:52	27.861	4.74	72.9	53.5	33.8
2012-11-10 17:57:52	27.6945	4.58	70.2	53.5	33.8
2012-11-10 18:57:52	27.75	4.53	69.6	53.4	33.8
2012-11-10 19:57:52	27.639	4.76	72.9	53.5	33.8
2012-11-10 20:57:52	27.5835	4.89	74.8	53.6	33.8
2012-11-10 21:57:52	27.639	4.8	73.5	53.3	33.8
2012-11-10 22:57:52	27.639	4.68	71.6	53.3	33.7
2012-11-10 23:57:52	27.639	4.76	72.9	53.4	33.7
2012-11-11 00:57:52	27.417	4.73	72.5	53.5	34.5
2012-11-11 01:57:52	27.417	4.88	74.5	53.4	33.7
2012-11-11 02:57:52	27.3615	4.78	73.2	53.5	34.4
2012-11-11 03:57:52	27.2505	4.71	71.9	53.4	34.4
2012-11-11 04:57:52	27.417	4.82	73.8	53.5	34.4
2012-11-11 05:57:52	27.2505	4.8	73.2	53.5	34.3
2012-11-11 06:57:52	27.195	4.82	73.5	53.5	34.2
2012-11-11 07:57:52	27.2505	4.78	72.9	53.4	34.2
2012-11-11 08:57:52	27.1395	4.76	72.5	53.3	34.2
2012-11-11 09:57:52	27.195	4.84	73.8	53.4	34.2
2012-11-11 10:57:52	27.195	4.76	72.5	53.3	34.2
2012-11-11 11:57:52	26.973	4.82	73.2	53.4	34.2
2012-11-11 12:57:52	27.1395	4.91	74.8	53.6	34.2
2012-11-11 13:57:52	27.0285	4.82	73.2	53.4	34.2
2012-11-11 14:57:52	27.0285	4.82	73.2	53.3	34.2
2012-11-11 15:57:52	27.1395	4.79	72.9	53.3	34.2
2012-11-11 16:57:52	27.084	4.98	75.8	53.4	34.2
2012-11-11 17:57:52	27.1395	4.81	73.2	53.3	34.2
2012-11-11 18:57:52	27.0285	4.68	71.2	53.3	34.2
2012-11-11 19:57:52	27.0285	4.75	72.2	53.4	34.2
2012-11-11 20:57:52	27.1395	4.79	72.9	53.5	34.2
2012-11-11 21:57:52	27.084	5.07	77.1	53.4	34.2
2012-11-11 22:57:52	27.0285	4.94	75.1	53.4	34.2
2012-11-11 23:57:52	27.0285	4.94	75.1	53.4	34.2
2012-11-12 00:57:52	27.0285	4.94	75.1	53.4	34.2
2012-11-12 01:57:52	26.9175	5.04	76.5	53.4	34.2
2012-11-12 02:57:52	27.0285	5.16	78.4	53.5	34.1
2012-11-12 03:57:52	26.9175	5.22	79.1	53.5	34.1
2012-11-12 04:57:52	26.8065	5.27	79.7	53.4	34
2012-11-12 05:57:52	26.6955	5.32	80.4	53.6	34
2012-11-12 06:57:52	26.64	5.02	75.8	53.4	34
2012-11-12 07:57:52	26.64	5	75.5	53.4	34
2012-11-12 08:57:52	26.6955	5.07	76.5	53.4	33.8
2012-11-12 09:57:52	26.529	5.09	76.5	53.4	33.8
2012-11-12 10:57:52	26.4735	5.11	76.8	53.5	33.8
2012-11-12 11:57:52	26.418	5.22	78.4	53.5	34.4
2012-11-12 12:57:52	26.6955	5.11	77.1	53.6	34
2012-11-12 13:57:52	26.973	4.84	73.5	53.4	34.2
2012-11-12 14:57:52	27.2505	4.69	71.6	53.5	34.4
2012-11-12 15:57:52	27.528	4.53	69.3	53.5	33.7
2012-11-12 16:57:52	27.861	4.51	69.3	53.5	33.9
2012-11-12 17:57:52	27.639	4.37	67	53.4	33.8
2012-11-12 18:57:52	27.9165	4.35	67	53.4	33.9
2012-11-12 19:57:52	27.639	4.47	68.6	53.4	33.9
2012-11-12 20:57:52	27.639	4.53	69.3	53.6	33.8
2012-11-12 21:57:52	27.861	4.52	69.6	53.4	33.9
2012-11-12 22:57:52	27.861	4.83	74.2	53.5	33.9
2012-11-12 23:57:52	27.6945	4.68	71.9	53.5	33.8
2012-11-13 00:57:52	27.75	4.64	71.2	53.5	33.9
2012-11-13 01:57:52	27.861	4.64	71.2	53.5	33.9
2012-11-13 02:57:52	27.6945	4.6	70.6	53.6	33.8
2012-11-13 03:57:52	27.75	4.6	70.6	53.5	33.8
2012-11-13 04:57:52	27.861	4.68	71.9	53.6	33.9
2012-11-13 05:57:52	27.8055	4.63	71.2	53.5	33.9
2012-11-13 06:57:52	27.6945	4.6	70.6	53.6	33.9
2012-11-13 07:57:52	27.972	4.56	70.2	53.5	34
2012-11-13 08:57:52	27.639	4.53	69.6	53.5	33.9
2012-11-13 09:57:52	27.6945	4.63	70.9	53.6	33.8
2012-11-13 10:57:52	27.8055	4.61	70.9	53.5	33.9
2012-11-13 11:57:52	27.6945	4.55	69.9	53.7	34
2012-11-13 12:57:52	27.6945	4.49	68.9	53.6	33.8
2012-11-13 13:57:52	27.861	4.47	68.6	53.5	33.9
2012-11-13 14:57:52	27.75	4.68	71.9	53.5	34
2012-11-13 15:57:52	27.528	4.79	73.2	53.6	33.8
2012-11-13 16:57:52	24.531	4.79	69.6	52.9	33.4
2012-11-13 17:57:52	25.086	5.03	73.8	52.9	33.7
2012-11-13 18:57:52	25.3635	5.14	75.8	53.2	33.9
2012-11-13 19:57:52	25.5855	5.18	76.8	53	33.8
2012-11-13 20:57:52	26.1405	4.87	72.9	52.9	34
2012-11-13 21:57:52	26.418	5.24	78.7	53.3	34.3
2012-11-13 22:57:52	26.751	5.17	78.1	53	33.8
2012-11-13 23:57:52	26.9175	5.02	76.1	53.3	34
2012-11-14 00:57:52	27.195	5.02	76.5	53.3	34.2
2012-11-14 01:57:52	27.3615	5.02	76.5	53.3	34.3
2012-11-14 02:57:52	27.75	5	76.8	53.2	33.7
2012-11-14 03:57:52	27.8055	5.02	77.1	53.2	33.7
2012-11-14 04:57:52	27.639	4.99	76.5	53	33.7
2012-11-14 05:57:52	27.8055	4.89	75.1	53	33.7
2012-11-14 06:57:52	27.6945	4.9	75.1	53.3	33.7
2012-11-14 07:57:52	27.75	4.81	73.8	53	33.7
2012-11-14 10:58:27	27.639	4.95	75.8	53.2	33.7
2012-11-14 11:58:27	27.75	4.96	76.1	53.2	33.7
2012-11-14 12:58:27	27.75	4.9	75.1	53.2	33.7
2012-11-14 13:58:27	27.8055	4.62	70.9	53.4	33.7
2012-11-14 14:58:27	27.861	4.53	69.6	53.3	33.8
2012-11-14 15:58:27	27.75	4.62	70.9	53.3	33.7
2012-11-14 16:58:27	27.6945	4.63	70.9	53.3	33.7
2012-11-14 17:58:27	27.861	4.63	71.2	53.3	33.8
2012-11-14 18:58:27	27.6945	4.72	72.2	53.3	33.7
2012-11-14 19:58:27	27.639	4.52	69.3	53.2	33.7
2012-11-14 20:58:27	27.8055	4.51	69.3	53.2	33.7
2012-11-14 21:58:27	27.75	4.64	71.2	53.3	33.7
2012-11-14 22:58:27	27.75	4.7	72.2	53.3	33.8
2012-11-14 23:58:27	27.8055	4.53	69.6	53.4	33.8
2012-11-15 00:58:27	27.639	4.63	70.9	53.3	33.7
2012-11-15 01:58:27	27.6945	4.61	70.9	53	33.8
2012-11-15 02:58:27	27.8055	4.71	72.2	53.5	33.8
2012-11-15 03:58:27	27.6945	4.63	70.9	53.3	33.7
2012-11-15 04:58:27	27.75	4.67	71.6	53.3	33.8
2012-11-15 05:58:27	27.8055	4.6	70.6	53.3	33.8
2012-11-15 06:58:27	27.639	4.67	71.6	53.3	33.7
2012-11-15 07:58:27	27.75	4.6	70.6	53.3	33.8
2012-11-15 08:58:27	27.75	4.55	69.9	53.2	33.8
2012-11-15 09:58:27	27.639	4.65	71.2	53.3	33.7
2012-11-15 10:58:27	27.8055	4.68	71.9	53.4	33.8
2012-11-15 11:58:27	27.528	4.64	70.9	53.2	33.6
2012-11-15 12:58:27	27.861	4.51	69.3	53.3	33.8
2012-11-15 13:58:27	27.861	4.55	69.9	53.2	33.7
2012-11-15 14:58:27	27.639	4.7	71.9	53.3	33.7
2012-11-15 15:58:27	27.861	4.66	71.6	53.3	33.8
2012-11-15 16:58:27	27.6945	4.77	73.2	53.3	33.7
2012-11-15 17:58:27	27.6945	4.67	71.6	53.2	33.7
2012-11-15 18:58:27	27.75	4.66	71.6	53.3	33.8
2012-11-15 19:58:27	27.75	4.69	71.9	53.3	33.7
2012-11-15 20:58:27	27.75	4.76	73.2	53.2	33.8
2012-11-15 21:58:27	27.8055	4.87	74.8	53.4	33.8
2012-11-15 22:58:27	27.639	4.97	76.1	53.2	33.7
2012-11-15 23:58:27	27.861	4.91	75.5	53.3	33.8
2012-11-16 00:58:27	27.75	5	76.8	53.4	33.8
2012-11-16 01:58:27	27.639	4.97	76.1	53.3	33.7
2012-11-16 02:58:27	27.861	4.89	75.1	53.3	33.8
2012-11-16 03:58:27	27.8055	4.95	75.8	53.4	33.7
2012-11-16 04:58:27	27.5835	5.04	77.1	53.3	33.7
2012-11-16 05:58:27	27.8055	4.93	75.8	53.4	33.8
2012-11-16 06:58:27	27.6945	4.99	76.5	53.3	33.7
2012-11-16 07:58:27	27.8055	4.95	76.1	53.4	33.8
2012-11-16 08:58:27	27.75	4.72	72.5	53.4	33.8
2012-11-16 09:58:27	27.639	4.93	75.5	53.3	33.7
2012-11-16 10:58:27	27.861	4.85	74.5	53.4	33.8
2012-11-16 11:58:27	27.639	4.83	74.2	53.3	33.8
2012-11-16 12:58:27	27.6945	4.8	73.5	53.4	33.7
2012-11-16 13:58:27	27.8055	4.72	72.5	53.3	33.8
2012-11-16 14:58:27	27.639	4.8	73.5	53.3	33.7
2012-11-16 15:58:27	27.306	4.79	73.2	53.3	34.2
2012-11-16 16:58:27	26.973	5.05	76.5	53.4	34
2012-11-16 17:58:27	26.64	4.94	74.5	53.3	33.8
2012-11-16 18:58:27	26.307	5.18	77.8	53.3	34.3
2012-11-16 19:58:27	25.974	5.14	76.8	53.3	34.1
2012-11-16 20:58:27	25.6965	5.24	77.8	53.3	33.9
2012-11-16 21:58:27	25.419	5.55	82.3	53.3	34.4
2012-11-16 22:58:27	25.1415	5.54	81.4	53.2	33.9
2012-11-16 23:58:27	24.975	5.51	80.7	53.2	33.7
2012-11-17 00:58:27	24.864	5.57	81.4	53.3	33.7
2012-11-17 01:58:27	24.864	5.46	79.7	53.2	33.7
2012-11-17 02:58:27	24.975	5.4	79.1	53.2	33.7
2012-11-17 03:58:27	24.864	5.39	78.7	53.2	33.7
2012-11-17 04:58:27	24.864	5.35	78.1	53.3	33.7
2012-11-17 05:58:27	24.975	5.49	80.4	53.2	33.7
2012-11-17 06:58:27	24.864	5.48	80	53.2	33.7
2012-11-17 07:58:27	24.8085	5.6	81.7	53.3	33.7
2012-11-17 08:58:27	24.9195	5.47	80	53.3	33.7
2012-11-17 09:58:27	24.864	5.44	79.4	53.3	33.7
2012-11-17 10:58:27	24.8085	5.39	78.7	53.3	33.7
2012-11-17 11:58:27	24.9195	5.32	77.8	53.2	33.7
2012-11-17 12:58:27	24.864	5.48	80	53.2	33.7
2012-11-17 13:58:27	24.8085	5.39	78.7	53.2	33.7
2012-11-17 14:58:27	24.975	5.28	77.4	53.2	33.7
2012-11-17 15:58:27	24.864	5.3	77.4	53.3	33.7
2012-11-17 16:58:27	24.8085	5.33	77.8	53.3	33.7
2012-11-17 17:58:27	24.9195	5.41	79.1	53.3	33.7
2012-11-17 18:58:27	24.864	5.42	79.1	53.3	33.7
2012-11-17 19:58:27	24.864	5.35	78.1	53.2	33.7
2012-11-17 20:58:27	24.975	5.37	78.7	53.2	33.7
2012-11-17 21:58:27	24.864	5.63	82.3	53.3	33.7
2012-11-17 22:58:27	24.864	5.59	81.7	53.3	33.7
2012-11-17 23:58:27	24.9195	5.7	83.3	53.3	33.7
2012-11-18 00:58:27	24.864	5.66	82.7	53.3	33.7
2012-11-18 01:58:27	24.9195	5.75	84	53.3	33.7
2012-11-18 02:58:27	24.9195	5.68	83	53.3	33.7
2012-11-18 03:58:27	24.864	5.7	83.3	53.3	33.7
2012-11-18 04:58:27	24.975	5.7	83.6	53.3	33.8
2012-11-18 05:58:27	24.9195	5.77	84.3	53.3	33.7
2012-11-18 06:58:27	24.864	5.79	84.6	53.3	33.7
2012-11-18 07:58:27	24.975	5.76	84.3	53.3	33.7
2012-11-18 08:58:27	24.864	5.57	81.4	53.3	33.7
2012-11-18 09:58:27	24.864	5.66	82.7	53.2	33.7
2012-11-18 10:58:27	24.9195	5.63	82.3	53.4	33.8
2012-11-18 11:58:27	25.308	5.63	83.3	53.4	34.4
2012-11-18 12:58:27	25.8075	5.38	80	53.4	34
2012-11-18 13:58:27	26.307	5.15	77.4	53.4	34.4
2012-11-18 14:58:27	26.751	5.28	79.7	53.5	34
2012-11-18 15:58:27	27.1395	4.72	71.9	53.4	34.2
2012-11-18 16:58:27	27.528	4.72	72.2	53.5	33.7
2012-11-18 17:58:27	27.972	4.55	70.2	53.5	34
2012-11-18 18:58:27	27.861	4.61	70.9	53.4	33.9
2012-11-18 19:58:27	27.9165	4.75	73.2	53.6	34
2012-11-19	27.8
2012-11-20	27.9
2012-11-21 10:59:02	27.75	5.78	88.5	52.4	33.3
2012-11-21 11:59:02	27.8055	5.77	88.5	52.6	33.4
2012-11-21 12:59:02	27.861	5.77	88.5	52.5	33.4
2012-11-21 13:59:02	27.9165	5.76	88.5	52.5	33.4
2012-11-21 14:59:02	27.972	5.72	87.9	52.4	33.4
2012-11-21 15:59:02	27.861	5.81	89.2	52.5	33.4
2012-11-21 16:59:02	27.75	5.78	88.5	52.6	33.4
2012-11-21 17:59:02	27.9165	5.72	87.9	52.4	33.4
2012-11-21 18:59:02	27.8055	5.82	89.2	52.6	33.4
2012-11-21 19:59:02	27.861	5.77	88.5	52.4	33.4
2012-11-21 20:59:02	27.861	5.77	88.5	52.6	33.4
2012-11-21 21:59:02	27.75	5.78	88.5	52.5	33.3
2012-11-21 22:59:02	27.972	5.72	87.9	52.6	33.4
2012-11-21 23:59:02	27.861	5.68	87.2	52.4	33.4
2012-11-22 00:59:02	27.8055	5.72	87.6	52.5	33.4
2012-11-22 01:59:02	27.972	5.72	87.9	52.5	33.4
2012-11-22 02:59:02	27.861	5.68	87.2	52.4	33.4
2012-11-22 03:59:02	27.861	5.73	87.9	52.5	33.4
2012-11-22 04:59:02	27.9165	5.68	87.2	52.5	33.4
2012-11-22 05:59:02	27.972	5.67	87.2	52.5	33.4
2012-11-22 06:59:02	27.972	5.67	87.2	52.5	33.4
2012-11-22 07:59:02	27.9165	5.71	87.6	52.5	33.4
2012-11-22 08:59:02	27.861	5.73	87.9	52.7	33.4
2012-11-22 09:59:02	27.972	5.67	87.2	52.6	33.4
2012-11-22 10:59:02	27.861	5.68	87.2	52.5	33.4
2012-11-22 11:59:02	27.861	5.68	87.2	52.6	33.4
2012-11-22 12:59:02	27.8055	5.69	87.2	52.7	33.4
2012-11-22 13:59:02	27.972	5.65	86.9	52.7	33.4
2012-11-22 14:59:02	27.861	5.63	86.3	52.6	33.4
2012-11-22 15:59:02	27.861	5.63	86.3	52.6	33.4
2012-11-22 16:59:02	27.861	5.63	86.3	52.6	33.4
2012-11-22 17:59:02	27.972	5.59	85.9	52.6	33.4
2012-11-22 18:59:02	27.75	5.64	86.3	52.6	33.4
2012-11-22 19:59:02	27.8055	5.69	87.2	52.7	33.4
2012-11-22 20:59:02	27.861	5.65	86.6	52.6	33.4
2012-11-22 21:59:02	27.8055	5.6	85.9	52.7	33.4
2012-11-22 22:59:02	27.9165	5.51	84.6	52.5	33.4
2012-11-22 23:59:02	27.861	5.51	84.6	52.5	33.4
2012-11-23 00:59:02	27.9165	5.62	86.3	52.7	33.4
2012-11-23 01:59:02	27.972	5.59	85.9	52.6	33.4
2012-11-23 02:59:02	27.861	5.56	85.3	52.5	33.4
2012-11-23 03:59:02	27.861	5.58	85.6	52.7	33.4
2012-11-23 04:59:02	27.972	5.59	85.9	52.7	33.4
2012-11-23 05:59:02	27.972	5.55	85.3	52.6	33.4
2012-11-23 06:59:02	27.75	5.61	85.9	52.7	33.4
2012-11-23 07:59:02	27.9165	5.53	84.9	52.5	33.5
2012-11-23 08:59:02	27.9165	5.64	86.6	52.8	33.4
2012-11-23 09:59:02	27.861	5.58	85.6	52.5	33.5
2012-11-23 10:59:02	27.75	5.57	85.3	52.5	33.4
2012-11-23 11:59:02	27.75	5.61	85.9	52.6	33.4
2012-11-23 12:59:02	27.972	5.58	85.9	52.6	33.5
2012-11-23 13:59:02	27.8055	5.58	85.6	52.7	33.5
2012-11-23 14:59:02	27.861	5.58	85.6	52.6	33.5
2012-11-23 15:59:02	27.972	5.57	85.6	52.5	33.4
2012-11-23 16:59:02	27.861	5.56	85.3	52.6	33.4
2012-11-23 17:59:02	27.9165	5.59	85.9	52.6	33.5
2012-11-23 18:59:02	27.861	5.6	85.9	52.7	33.5
2012-11-23 19:59:02	27.8055	5.56	85.3	52.6	33.4
2012-11-23 20:59:02	27.861	5.6	85.9	52.7	33.4
2012-11-23 21:59:02	27.972	5.52	84.9	52.5	33.5
2012-11-23 22:59:02	27.861	5.56	85.3	52.6	33.5
2012-11-23 23:59:02	27.8055	5.6	85.9	52.7	33.5
2012-11-24 00:59:02	27.8055	5.58	85.6	52.7	33.5
2012-11-24 01:59:02	27.9165	5.57	85.6	52.6	33.4
2012-11-24 02:59:02	27.8055	5.63	86.3	52.7	33.5
2012-11-24 03:59:02	27.972	5.58	85.9	52.7	33.5
2012-11-24 04:59:02	27.972	5.61	86.3	52.7	33.5
2012-11-24 05:59:02	27.9165	5.57	85.6	52.6	33.5
2012-11-24 06:59:02	27.972	5.63	86.6	52.8	33.5
2012-11-24 07:59:02	27.9165	5.59	85.9	52.6	33.5
2012-11-24 08:59:02	27.8055	5.65	86.6	52.8	33.5
2012-11-24 09:59:02	27.8055	5.6	85.9	52.6	33.5
2012-11-24 10:59:02	27.861	5.6	85.9	52.8	33.5
2012-11-24 11:59:02	27.972	5.63	86.6	52.7	33.5
2012-11-24 12:59:02	27.75	5.61	85.9	52.7	33.5
2012-11-24 13:59:02	27.861	5.6	85.9	52.7	33.5
2012-11-24 14:59:02	27.9165	5.62	86.3	52.7	33.5
2012-11-24 15:59:02	27.972	5.58	85.9	52.7	33.5
2012-11-24 16:59:02	27.861	5.62	86.3	52.6	33.5
2012-11-24 17:59:02	27.9165	5.57	85.6	52.6	33.5
2012-11-24 18:59:02	27.9165	5.64	86.6	52.8	33.5
2012-11-24 19:59:02	27.9165	5.64	86.6	52.8	33.5
2012-11-24 20:59:02	27.861	5.6	85.9	52.7	33.5
2012-11-24 21:59:02	27.861	5.56	85.3	52.6	33.5
2012-11-24 22:59:02	27.75	5.57	85.3	52.7	33.5
2012-11-24 23:59:02	27.75	5.65	86.6	53	33.5
2012-11-25 00:59:02	27.861	5.64	86.6	52.8	33.5
2012-11-25 01:59:02	27.9165	5.57	85.6	52.7	33.6
2012-11-25 02:59:02	27.861	5.66	86.9	52.9	33.6
2012-11-25 03:59:02	27.9165	5.64	86.6	52.8	33.5
2012-11-25 04:59:02	27.861	5.68	87.2	52.9	33.5
2012-11-25 05:59:02	27.9165	5.59	85.9	52.8	33.5
2012-11-25 06:59:02	27.9165	5.64	86.6	52.8	33.4
2012-11-25 07:59:02	27.8055	5.65	86.6	52.8	33.5
2012-11-25 08:59:02	27.8055	5.6	85.9	52.7	33.5
2012-11-25 09:59:02	27.861	5.66	86.9	52.8	33.5
2012-11-25 10:59:02	27.861	5.62	86.3	52.8	33.6
2012-11-25 11:59:02	27.8055	5.64	86.6	52.7	33.6
2012-11-25 12:59:02	27.861	5.55	85.3	52.9	33.6
2012-11-25 13:59:02	27.8055	5.39	82.7	52.8	33.6
2012-11-25 14:59:02	27.861	5.47	84	53	33.5
2012-11-25 15:59:02	27.8055	5.45	83.6	53	33.6
2012-11-25 16:59:02	27.972	5.33	82	52.9	33.6
2012-11-25 17:59:02	27.972	5.31	81.7	52.9	33.6
2012-11-25 18:59:02	27.861	5.3	81.4	52.9	33.6
2012-11-25 19:59:02	27.972	5.26	81	53	33.6
2012-11-25 20:59:02	27.8055	5.28	81	52.9	33.6
2012-11-25 21:59:02	27.8055	5.3	81.4	53	33.6
2012-11-25 22:59:02	27.861	5.19	79.7	52.9	33.6
2012-11-25 23:59:02	27.9165	5.23	80.4	52.9	33.6
2012-11-26 00:59:02	27.8055	5.19	79.7	52.9	33.7
2012-11-26 01:59:02	27.8055	5.19	79.7	52.9	33.6
2012-11-26 02:59:02	27.972	5.2	80	52.9	33.6
2012-11-26 03:59:02	27.972	5.26	81	53	33.6
2012-11-26 04:59:02	27.972	5.26	81	52.9	33.6
2012-11-26 05:59:02	27.75	5.22	80	52.9	33.6
2012-11-26 06:59:02	27.75	5.22	80	52.8	33.6
2012-11-26 07:59:02	27.9165	5.18	79.7	52.8	33.6
2012-11-26 08:59:02	27.861	5.27	81	52.9	33.6
2012-11-26 09:59:02	27.8055	5.28	81	52.8	33.6
2012-11-26 10:59:02	27.972	5.26	81	52.9	33.6
2012-11-26 11:59:02	27.861	5.32	81.7	53	33.6
2012-11-26 12:59:02	27.9165	5.27	81	52.9	33.6
2012-11-26 13:59:02	27.8055	5.15	79.1	53	33.6
2012-11-26 14:59:02	25.6965	5.51	81.4	52.7	33.2
2012-11-26 15:59:02	26.0295	5.56	83	52.5	33.8
2012-11-26 16:59:02	26.5845	5.59	84	52.5	33.3
2012-11-26 17:59:02	26.751	5.46	82.3	52.6	33.6
2012-11-26 18:59:02	27.1395	5.53	84	52.8	33.8
2012-11-26 19:59:02	27.639	5.41	82.7	52.6	33.3
2012-11-26 20:59:02	27.972	5.42	83.3	52.8	33.5
2012-11-26 21:59:02	27.9165	5.38	82.7	52.8	33.5
2012-11-26 22:59:02	27.75	5.37	82.3	52.7	33.5
2012-11-26 23:59:02	27.8055	5.39	82.7	52.7	33.5
2012-11-27 00:59:02	27.8055	5.39	82.7	52.7	33.5
2012-11-27 01:59:02	27.861	5.43	83.3	52.6	33.5
2012-11-27 02:59:02	27.861	5.41	83	52.7	33.5
2012-11-27 03:59:02	27.861	5.45	83.6	52.8	33.5
2012-11-27 04:59:02	27.972	5.44	83.6	52.8	33.5
2012-11-27 05:59:02	27.861	5.41	83	52.6	33.5
2012-11-27 06:59:02	27.9165	5.49	84.3	52.8	33.5
2012-11-27 07:59:02	27.75	5.44	83.3	52.6	33.5
2012-11-27 08:59:02	27.861	5.49	84.3	52.7	33.5
2012-11-27 09:59:02	27.972	5.5	84.6	52.8	33.5
2012-11-27 10:59:02	27.9165	5.49	84.3	52.7	33.5
2012-11-27 11:59:02	27.861	5.51	84.6	52.7	33.5
2012-11-27 12:59:02	27.861	5.41	83	52.7	33.5
2012-11-27 13:59:02	27.9165	5.3	81.4	52.9	33.5
2012-11-27 14:59:02	27.9165	5.32	81.7	52.9	33.5
2012-11-27 15:59:02	27.9165	5.25	80.7	52.9	33.5
2012-11-27 16:59:02	27.8055	5.13	78.7	52.7	33.5
2012-11-27 17:59:02	27.972	5.16	79.4	52.9	33.5
2012-11-27 18:59:02	27.972	5.14	79.1	52.8	33.5
2012-11-27 19:59:02	27.861	5.19	79.7	52.8	33.6
2012-11-27 20:59:02	27.972	5.14	79.1	52.8	33.5
2012-11-27 21:59:02	27.861	5.15	79.1	52.8	33.5
2012-11-27 22:59:02	27.861	5.15	79.1	53	33.6
2012-11-27 23:59:02	27.972	5.08	78.1	52.9	33.6
2012-11-28 00:59:02	27.861	5.1	78.4	53	33.6
2012-11-28 01:59:02	27.8055	5.13	78.7	53	33.5
2012-11-28 02:59:02	27.861	5.15	79.1	52.8	33.6
2012-11-28 03:59:02	27.972	5.16	79.4	52.9	33.5
2012-11-28 04:59:02	27.8055	5.21	80	52.9	33.6
2012-11-28 05:59:02	27.8055	5.2	79.7	52.9	33.5
2012-11-28 06:59:02	27.75	5.22	80	53	33.6
2012-11-28 10:59:38	27.972	5.46	84	52.9	33.6
2012-11-28 11:59:38	27.6945	5.49	84	52.9	33.5
2012-11-28 12:59:38	27.4725	5.51	84	52.8	33.4
2012-11-28 13:59:38	27.417	5.62	85.9	52.9	34
2012-11-28 14:59:38	27.306	5.63	85.9	52.9	34
2012-11-28 15:59:38	27.195	5.61	85.3	52.8	33.8
2012-11-28 16:59:38	27.0285	5.62	85.3	52.8	33.8
2012-11-28 17:59:38	26.8065	5.62	84.9	52.7	33.6
2012-11-28 18:59:38	26.64	5.62	84.6	52.8	33.6
2012-11-28 19:59:38	26.5845	5.74	86.3	52.7	33.5
2012-11-28 20:59:38	26.529	5.77	86.6	52.7	33.5
2012-11-28 21:59:38	26.529	5.72	85.9	52.6	33.4
2012-11-28 22:59:38	26.418	5.69	85.6	52.8	34.1
2012-11-28 23:59:38	26.3625	5.7	85.6	52.7	34
2012-11-29 00:59:38	26.307	5.81	87.2	52.7	34
2012-11-29 01:59:38	26.1405	5.74	85.9	52.8	34
2012-11-29 02:59:38	26.1405	5.79	86.6	52.8	33.9
2012-11-29 03:59:38	25.9185	5.8	86.3	52.8	33.8
2012-11-29 04:59:38	25.863	5.85	86.9	52.7	33.7
2012-11-29 05:59:38	25.6965	5.86	86.6	52.8	33.2
2012-11-29 06:59:38	25.5855	5.87	86.6	52.7	33.2
2012-11-29 07:59:38	25.4745	5.95	87.6	52.8	33.1
2012-11-29 08:59:38	25.3635	5.94	87.6	52.7	33.7
2012-11-29 09:59:38	25.197	5.98	87.9	52.8	33.7
2012-11-29 10:59:38	25.197	5.96	87.6	52.7	33.6
2012-11-29 11:59:38	25.086	5.95	87.2	52.7	33.5
2012-11-29 12:59:38	25.0305	5.85	85.6	52.6	33.5
2012-11-29 13:59:38	24.975	5.83	85.3	52.7	33.4
2012-11-29 14:59:38	24.8085	5.86	85.3	52.8	33.4
2012-11-29 15:59:38	24.642	5.85	84.9	52.8	33.3
2012-11-29 16:59:38	24.8085	5.83	84.9	52.7	33.3
2012-11-29 17:59:38	24.531	5.84	84.6	52.7	33.3
2012-11-29 18:59:38	24.8085	5.79	84.3	52.8	33.4
2012-11-29 19:59:38	24.753	5.77	84	52.8	33.4
2012-11-29 20:59:38	24.642	5.79	84	52.8	33.3
2012-11-29 21:59:38	24.642	5.74	83.3	52.6	33.3
2012-11-29 22:59:38	24.864	5.69	83	52.7	33.4
2012-11-29 23:59:38	24.753	5.77	84	52.8	33.3
2012-11-30 00:59:38	24.6975	5.73	83.3	52.7	33.3
2012-11-30 01:59:38	24.642	5.72	83	52.7	33.3
2012-11-30 02:59:38	24.8085	5.61	81.7	52.8	33.4
2012-11-30 03:59:38	24.8085	5.72	83.3	52.8	33.3
2012-11-30 04:59:38	24.6975	5.69	82.7	52.7	33.3
2012-11-30 05:59:38	24.8085	5.72	83.3	52.9	33.4
2012-11-30 06:59:38	24.864	5.71	83.3	52.7	33.4
2012-11-30 07:59:38	24.6975	5.75	83.6	52.8	33.3
2012-11-30 08:59:38	24.531	5.8	84	52.8	33.3
2012-11-30 09:59:38	24.864	5.76	84	52.7	33.4
2012-11-30 10:59:38	24.864	5.76	84	52.7	33.4
2012-11-30 11:59:38	24.753	5.8	84.3	52.7	33.3
2012-11-30 12:59:38	24.753	5.84	84.9	52.7	33.3
2012-11-30 13:59:38	24.8085	5.87	85.6	52.8	33.5
2012-11-30 14:59:38	24.753	5.93	86.3	52.8	33.4
2012-11-30 15:59:38	24.753	5.93	86.3	52.8	33.3
2012-11-30 16:59:38	24.642	5.9	85.6	52.7	33.3
2012-11-30 17:59:38	24.864	5.87	85.6	52.8	33.4
2012-11-30 18:59:38	24.8085	5.9	85.9	52.8	33.4
2012-11-30 19:59:38	24.753	5.93	86.3	52.8	33.4
2012-11-30 20:59:38	24.6975	6	87.2	52.8	33.3
2012-11-30 21:59:38	24.642	5.94	86.3	52.8	33.3
2012-11-30 22:59:38	24.864	5.92	86.3	52.7	33.4
2012-11-30 23:59:38	24.753	5.95	86.6	52.8	33.4
2012-12-01 00:59:38	24.5865	6.04	87.6	52.9	33.3
2012-12-01 01:59:38	24.6975	6	87.2	52.7	33.3
[truncated: 353 more rows]

## Sheet: Tank 2_NWL 5_1081
Date & Time	HTempData	DO (mg/L)	DO (%)	Cond (mS/cm)	Sal (ppt)
2012-04-13	14.4
2012-04-14	13.8
2012-04-15	13.9
2012-04-16	14.1
2012-04-17	14.7
2012-04-18	18.1					*problem with chiller
2012-04-19	19.9
2012-04-20	21.2
2012-04-21	21.8
2012-04-22	22.3
2012-04-23	22.2
2012-04-24	21.9
2012-04-25	21.3
2012-04-26	21.7
2012-04-27	21.7
2012-04-28	22.3
2012-04-29	22.7
2012-04-30
2012-05-01	18.6
2012-05-02	17.2
2012-05-03	17.2
2012-05-04	20.6					*problem with chiller
2012-05-05	23.1
2012-05-06	24.1
2012-05-07	24.9
2012-05-08	19.2
2012-05-09	18.2
2012-05-10	18.3
2012-05-11	18.2
2012-05-12	18.2
2012-05-13	18.3
2012-05-14	18.4
2012-05-15	18.7
2012-05-16 10:50:01	18.92	5.89	76.8	51.1	32.6
2012-05-16 11:50:01	18.92	5.86	76.4	51.1	32.6
2012-05-16 12:50:01	20.3075	5.38	72.3	51.3	33.2
2012-05-16 13:50:01	19.9745	5.65	75.3	51.5	33
2012-05-16 15:50:01	19.6415	5.73	75.6	51.4	32.4
2012-05-16 16:50:01	19.5305	5.79	76.2	51.2	32.3
2012-05-16 17:50:01	19.4195	5.69	75.1	51.4	33.1
2012-05-16 19:50:01	18.92	5.77	75.3	51.3	32.8
2012-05-16 20:50:01	18.92	5.77	75.3	51.3	32.8
2012-05-16 21:50:01	18.698	5.82	75.6	51.4	32.7
2012-05-16 22:50:01	18.698	5.85	76	51.3	32.6
2012-05-16 23:50:01	18.7535	5.86	76.2	51.3	32.7
2012-05-17 00:50:01	18.8645	5.83	76	51.3	32.7
2012-05-17 02:50:01	18.7535	5.85	76	51.3	32.6
2012-05-17 03:50:01	18.8645	5.85	76.2	51.3	32.7
2012-05-17 04:50:01	18.8645	5.86	76.4	51.3	32.8
2012-05-17 05:50:01	18.809	5.87	76.4	51.3	32.7
2012-05-17 07:50:01	18.698	5.78	75.3	51.3	32.7
2012-05-17 08:50:01	18.809	5.86	76.4	51.3	32.7
2012-05-17 09:50:01	18.809	5.91	76.9	51.3	32.7
2012-05-17 11:50:01	18.7535	5.93	77.1	51.3	32.7
2012-05-17 12:50:01	18.8645	5.93	77.3	51.3	32.7
2012-05-17 13:50:01	18.7535	5.96	77.5	51.4	32.7
2012-05-17 14:50:01	18.698	5.88	76.4	51.3	32.6
2012-05-17 15:50:01	18.809	5.85	76.2	51.3	32.7
2012-05-17 16:50:01	18.809	5.87	76.4	51.3	32.8
2012-05-17 18:50:01	18.8645	5.88	76.6	51.3	32.7
2012-05-17 19:50:01	18.698	5.84	75.8	51.3	32.6
2012-05-17 20:50:01	18.7535	5.86	76.2	51.3	32.6
2012-05-17 21:50:01	18.809	5.87	76.4	51.3	32.7
2012-05-17 22:50:01	18.8645	5.85	76.2	51.3	32.7
2012-05-17 23:50:01	18.698	5.84	76	51.2	32.6
2012-05-18 00:50:01	18.809	5.88	76.4	51.3	32.6
2012-05-18 01:50:01	18.809	5.95	77.5	51.3	32.7
2012-05-18 02:50:01	18.809	5.93	77.3	51.3	32.7
2012-05-18 03:50:01	18.698	5.96	77.5	51.3	32.6
2012-05-18 04:50:01	18.587	5.92	76.9	51.3	32.6
2012-05-18 05:50:01	18.8645	5.9	76.8	51.3	32.6
2012-05-18 06:50:01	18.809	5.91	76.9	51.3	32.7
2012-05-18 07:50:01	18.8645	5.95	77.5	51.3	32.7
2012-05-18 08:50:01	18.698	5.9	76.6	51.3	32.6
2012-05-18 09:50:01	18.7535	5.92	76.9	51.3	32.6
2012-05-18 11:50:01	18.8645	5.95	77.5	51.3	32.7
2012-05-18 12:50:01	18.6425	5.97	77.5	51.3	32.6
2012-05-18 13:50:01	18.809	5.94	77.3	51.3	32.6
2012-05-18 14:50:01	18.809	5.94	77.3	51.3	32.7
2012-05-18 15:50:01	18.9755	5.97	77.7	51.3	32.7
2012-05-18 16:50:01	18.698	6	77.9	51.3	32.6
2012-05-18 17:50:01	18.698	5.95	77.3	51.3	32.6
2012-05-18 18:50:01	18.7535	5.96	77.5	51.3	32.7
2012-05-18 19:50:01	18.8645	6.03	78.6	51.3	32.7
2012-05-18 20:50:01	18.809	5.98	77.9	51.3	32.7
2012-05-18 21:50:01	18.698	5.99	77.7	51.3	32.6
2012-05-18 22:50:01	18.7535	5.99	77.9	51.3	32.6
2012-05-18 23:50:01	18.809	6.01	78.3	51.3	32.7
2012-05-19 00:50:01	18.8645	6.02	78.4	51.3	32.7
2012-05-19 01:50:01	18.698	6.02	78.1	51.3	32.6
2012-05-19 02:50:01	18.698	6.03	78.3	51.3	32.6
2012-05-19 03:50:01	18.809	6	78.1	51.4	32.7
2012-05-19 04:50:01	18.809	5.98	77.9	51.3	32.7
2012-05-19 05:50:01	18.698	6.03	78.3	51.3	32.7
2012-05-19 06:50:01	18.698	5.97	77.5	51.3	32.6
2012-05-19 07:50:01	18.7535	5.97	77.7	51.3	32.7
2012-05-19 09:50:01	18.809	6.04	78.6	51.3	32.7
2012-05-19 10:50:01	18.6425	6.06	78.6	51.4	32.6
2012-05-19 11:50:01	18.698	6.03	78.3	51.4	32.6
2012-05-19 12:50:01	18.809	6	78.1	51.3	32.7
2012-05-19 14:50:01	18.8645	6.02	78.1	51.4	32.6
2012-05-19 15:50:01	18.809	6.07	78.8	51.3	32.6
2012-05-19 16:50:01	18.7535	6.04	78.6	51.3	32.7
2012-05-19 18:50:01	18.809	6.01	78.3	51.4	32.7
2012-05-19 19:50:01	18.7535	6.02	78.1	51.3	32.6
2012-05-19 20:50:01	18.7535	6.01	78.3	51.3	32.7
2012-05-19 21:50:01	18.8645	5.99	78.1	51.3	32.7
2012-05-19 23:50:01	18.698	6.02	78.1	51.3	32.6
2012-05-20 01:50:01	18.809	5.94	77.3	51.3	32.7
2012-05-20 02:50:01	18.92	5.94	77.5	51.3	32.7
2012-05-20 03:50:01	18.7535	5.99	77.7	51.4	32.6
2012-05-20 04:50:01	18.7535	5.94	77.3	51.4	32.7
2012-05-20 06:50:01	18.8645	5.9	76.9	51.4	32.8
2012-05-20 08:50:01	18.809	5.91	76.9	51.4	32.6
2012-05-20 09:50:01	18.809	5.9	76.8	51.2	32.7
2012-05-20 10:50:01	19.253	5.82	76.6	51.4	33.1
2012-05-20 11:50:01	19.5305	5.87	77.3	51.4	32.4
2012-05-20 12:50:01	19.697	5.78	76.4	51.4	32.4
2012-05-20 13:50:01	19.697	5.78	76.4	51.4	32.5
2012-05-20 14:50:01	19.7525	5.81	76.8	51.4	32.5
2012-05-20 15:50:01	19.808	5.85	77.5	51.4	32.6
2012-05-20 16:50:01	19.8635	5.77	76.6	51.4	32.6
2012-05-20 17:50:01	19.586	5.94	78.4	51.4	32.5
2012-05-20 18:50:01	19.7525	5.87	77.7	51.4	32.5
2012-05-20 19:50:01	19.919	5.8	76.8	51.4	32.5
2012-05-20 20:50:01	19.919	5.65	75.1	51.4	32.6
2012-05-20 21:50:01	19.697	5.71	75.4	51.4	32.5
2012-05-20 22:50:01	19.697	5.68	75.1	51.4	32.5
2012-05-20 23:50:01	19.808	5.64	74.7	51.4	32.5
2012-05-21 00:50:01	19.808	5.64	74.7	51.3	32.6
2012-05-21 01:50:01	19.8635	5.62	74.7	51.3	32.6
2012-05-21 02:50:01	19.7525	5.66	74.9	51.4	32.6
2012-05-21 03:50:01	19.6415	5.66	74.7	51.4	32.4
2012-05-21 04:50:01	19.697	5.7	75.3	51.5	32.5
2012-05-21 05:50:01	19.7525	5.66	74.9	51.3	32.5
2012-05-21 08:50:01	19.808	5.66	74.9	51.4	32.5
2012-05-21 09:50:01	19.697	5.67	74.9	51.4	32.5
2012-05-21 10:50:01	19.808	5.64	74.7	51.4	32.5
2012-05-21 11:50:01	19.7525	5.66	74.9	51.4	32.6
2012-05-21 12:50:01	19.808	5.65	74.9	51.4	32.6
2012-05-21 13:50:01	19.697	5.73	75.6	51.4	32.4
2012-05-21 14:50:01	19.7525	5.7	75.4	51.4	32.5
2012-05-21 17:50:01	19.7525	5.68	75.1	51.4	32.5
2012-05-21 18:50:01	19.697	5.67	74.9	51.4	32.5
2012-05-21 19:50:01	19.808	5.63	74.5	51.3	32.5
2012-05-21 20:50:01	19.8635	5.62	74.5	51.5	32.6
2012-05-21 21:50:01	19.919	5.66	75.1	51.4	32.6
2012-05-21 22:50:01	19.697	5.67	74.9	51.4	32.5
2012-05-21 23:50:01	19.7525	5.69	75.3	51.4	32.5
2012-05-22 00:50:01	19.808	5.65	74.9	51.3	32.6
2012-05-22 01:50:01	19.8635	5.68	75.4	51.4	32.6
2012-05-22 02:50:01	19.8635	5.68	75.3	51.4	32.6
2012-05-22 03:50:01	19.697	5.65	74.7	51.4	32.5
2012-05-22 04:50:01	19.7525	5.69	75.3	51.5	32.5
2012-05-22 05:50:01	19.808	5.74	76	51.5	32.6
2012-05-22 06:50:01	19.919	5.69	75.4	51.5	32.6
2012-05-22 08:50:01	19.6415	5.7	75.4	51.4	32.5
2012-05-22 09:50:01	19.7525	5.74	76	51.4	32.6
2012-05-23	19.8
2012-05-24	19.9
2012-05-25	19.9
2012-05-26	19.7
2012-05-27	19.7
2012-05-28	19.8
2012-05-29	20.7
2012-05-30	21.3
2012-05-31	23.6
2012-06-01	20.7
2012-06-02	20.8
2012-06-03	20.8
2012-06-04	20.7
2012-06-05	21.7
2012-06-06	21.8
2012-06-07	21.7
2012-06-08	23.7
2012-06-09	24.7
2012-06-10	21.7
2012-06-11	21.6
2012-06-12	22.8
2012-06-13	22.6
2012-06-14	22.8
2012-06-15
2012-06-16	22.8
2012-06-17	22.8
2012-06-18	22.7
2012-06-19	23.6
2012-06-20	23.8
2012-06-21	23.8
2012-06-22	25.2
2012-06-23	23.8
2012-06-24	23.8
2012-06-25	23.6
2012-06-26	27.9					Increased temp to induce spawn
2012-06-27	27.8
2012-06-28	27.7
2012-06-29	27.7
2012-06-30	27.7
2012-07-01	27.7
2012-07-02	27.9
2012-07-03	27.7
2012-07-04	28.1
2012-07-05	27.9
2012-07-06	24.8					Decreased
2012-07-07	24.8
2012-07-08	24.7
2012-07-09	24.7
2012-07-10	27.8					Increased
2012-07-11	27.8
2012-07-12	26.4					Decreased
2012-07-13	26.1
2012-07-14	25.4
2012-07-15	25.1
2012-07-16	25.1
2012-07-17	27.8
2012-07-18	27.8
2012-07-19	27.7
2012-07-20	27.6
2012-07-21	27.7
2012-07-22	27.8
2012-07-23	27.7
2012-07-24	27.7
2012-07-25 09:59:18	27.8055	5.84	89.1	49.9	32.4
2012-07-25 10:59:18	27.8055	5.79	88.3	49.9	32.4
2012-07-25 11:59:18	27.75	5.78	88	49.9	32.3
2012-07-25 12:59:18	27.6945	5.77	87.7	49.8	32.3
2012-07-25 13:59:18	27.6945	5.8	88.3	49.9	32.3
2012-07-25 14:59:18	27.639	5.75	87.4	49.9	32.4
2012-07-25 15:59:18	27.639	5.73	87.1	50	32.4
2012-07-25 16:59:18	27.639	5.77	87.7	49.9	32.4
2012-07-25 17:59:18	27.528	5.74	87.1	49.9	32.4
2012-07-25 18:59:18	27.9165	5.63	86	50	32.4
2012-07-25 19:59:18	27.9165	5.7	87.1	49.9	32.5
2012-07-25 20:59:18	27.9165	5.63	86	50	32.4
2012-07-25 21:59:18	27.861	5.63	86	50	32.4
2012-07-25 22:59:18	27.861	5.65	86.3	50	32.5
2012-07-25 23:59:18	27.8055	5.71	87.1	49.9	32.4
2012-07-26 00:59:18	27.75	5.74	87.4	49.9	32.5
2012-07-26 01:59:18	27.75	5.74	87.4	49.9	32.4
2012-07-26 02:59:18	27.6945	5.72	87.1	49.9	32.4
2012-07-26 03:59:18	27.8055	5.71	87.1	49.9	32.4
2012-07-26 04:59:18	27.639	5.72	86.9	49.9	32.4
2012-07-26 05:59:18	27.528	5.76	87.4	49.9	32.4
2012-07-26 06:59:18	27.972	5.73	87.7	50	32.5
2012-07-26 07:59:18	27.9165	5.72	87.4	50	32.5
2012-07-26 08:59:18	27.861	5.76	88	50	32.5
2012-07-26 09:59:18	27.8055	5.81	88.6	49.9	32.5
2012-07-26 10:59:18	27.8055	5.81	88.6	50	32.4
2012-07-26 11:59:18	27.8055	5.79	88.3	49.9	32.4
2012-07-26 12:59:18	27.75	5.76	87.7	50	32.4
2012-07-26 13:59:18	27.75	5.76	87.7	49.9	32.3
2012-07-26 14:59:18	27.639	5.73	87.1	49.9	32.4
2012-07-26 15:59:18	27.639	5.72	86.9	49.8	32.4
2012-07-26 16:59:18	27.75	5.72	87.1	49.9	32.4
2012-07-26 17:59:18	27.6945	5.72	87.1	49.9	32.4
2012-07-26 18:59:18	27.6945	5.69	86.6	49.9	32.4
2012-07-26 19:59:18	27.6945	5.69	86.6	49.9	32.4
2012-07-26 20:59:18	27.6945	5.73	87.1	49.9	32.3
2012-07-26 21:59:18	27.639	5.72	86.9	49.9	32.4
2012-07-26 22:59:18	27.639	5.7	86.6	49.9	32.4
2012-07-26 23:59:18	27.639	5.72	86.9	49.9	32.4
2012-07-27 00:59:18	27.9165	5.7	87.1	50	32.5
2012-07-27 01:59:18	27.972	5.73	87.7	50	32.5
2012-07-27 02:59:18	27.8055	5.79	88.3	50	32.5
2012-07-27 03:59:18	27.8055	5.7	86.9	50	32.4
2012-07-27 04:59:18	27.8055	5.81	88.6	50	32.5
2012-07-27 05:59:18	27.75	5.72	87.1	50	32.5
2012-07-27 06:59:18	27.8055	5.81	88.6	49.9	32.4
2012-07-27 07:59:18	27.75	5.78	88	49.9	32.5
2012-07-27 08:59:18	27.6945	5.88	89.4	50	32.4
2012-07-27 09:59:18	27.639	5.86	89.1	49.9	32.4
2012-07-27 10:59:18	27.639	5.86	89.1	49.9	32.4
2012-07-27 11:59:18	27.639	5.88	89.4	49.9	32.4
2012-07-27 12:59:18	27.639	5.89	89.4	49.9	32.4
2012-07-27 13:59:18	27.75	5.84	88.9	50	32.4
2012-07-27 14:59:18	27.861	5.8	88.6	50	32.5
2012-07-27 15:59:18	27.9165	5.9	90	50	32.5
2012-07-27 16:59:18	27.861	5.82	88.9	50	32.5
2012-07-27 17:59:18	27.861	5.82	88.9	50	32.5
2012-07-27 18:59:18	27.861	5.86	89.4	50	32.5
2012-07-27 19:59:18	27.861	5.82	88.9	50	32.5
2012-07-27 20:59:18	27.9165	5.87	89.7	49.9	32.5
2012-07-27 21:59:18	27.8055	5.88	89.7	50.1	32.5
2012-07-27 22:59:18	27.8055	5.84	89.1	50	32.5
2012-07-27 23:59:18	27.75	5.89	89.7	50	32.5
2012-07-28 00:59:18	27.6945	5.89	89.7	50	32.5
2012-07-28 01:59:18	27.6945	5.88	89.4	50	32.4
2012-07-28 02:59:18	27.639	5.9	89.7	50.1	32.4
2012-07-28 03:59:18	27.639	5.92	90	49.9	32.4
2012-07-28 04:59:18	27.639	5.88	89.4	50.1	32.4
2012-07-28 05:59:18	27.9165	5.89	90	50	32.5
2012-07-28 06:59:18	27.9165	5.89	90	50	32.5
2012-07-28 07:59:18	27.861	5.9	90	50	32.4
2012-07-28 08:59:18	27.8055	5.92	90.3	50	32.5
2012-07-28 09:59:18	27.8055	5.92	90.3	50	32.4
2012-07-28 10:59:18	27.75	5.91	90	50	32.5
2012-07-28 11:59:18	27.75	5.91	90	49.9	32.4
2012-07-28 12:59:18	27.6945	5.98	91.1	50.1	32.5
2012-07-28 13:59:18	27.6945	5.91	90	49.9	32.4
2012-07-28 14:59:18	27.75	5.91	90	49.9	32.4
2012-07-28 15:59:18	27.75	5.94	90.3	49.9	32.4
2012-07-28 16:59:18	27.639	5.9	89.7	50.1	32.4
2012-07-28 17:59:18	27.639	5.92	90	50.1	32.4
2012-07-28 18:59:18	27.639	5.96	90.6	49.9	32.4
2012-07-28 19:59:18	27.8055	5.9	90	50	32.5
2012-07-28 20:59:18	27.861	5.89	90	50	32.5
2012-07-28 21:59:18	27.861	5.9	90	50	32.5
2012-07-28 22:59:18	27.861	5.9	90	50	32.5
2012-07-28 23:59:18	27.861	5.92	90.3	49.9	32.4
2012-07-29 00:59:18	27.8055	5.9	90	49.9	32.5
2012-07-29 01:59:18	27.75	5.93	90.3	50	32.4
2012-07-29 02:59:18	27.6945	5.91	90	50.1	32.5
2012-07-29 03:59:18	27.75	5.97	90.9	50	32.5
2012-07-29 04:59:18	27.6945	5.95	90.6	49.9	32.5
2012-07-29 05:59:18	27.639	5.96	90.6	50.1	32.5
2012-07-29 06:59:18	27.861	5.97	91.1	50	32.5
2012-07-29 07:59:18	27.8055	5.92	90.3	50	32.5
2012-07-29 08:59:18	27.861	5.97	91.1	50	32.5
2012-07-29 09:59:18	27.8055	5.99	91.4	50	32.5
2012-07-29 10:59:18	27.75	5.98	91.1	50	32.5
2012-07-29 11:59:18	27.6945	5.93	90.3	50.1	32.5
2012-07-29 12:59:18	27.75	5.97	90.9	50	32.4
2012-07-29 13:59:18	27.639	5.98	90.9	50	32.5
2012-07-29 14:59:18	27.6945	5.95	90.6	49.9	32.4
2012-07-29 15:59:18	27.6945	5.88	89.4	49.9	32.4
2012-07-29 16:59:18	27.75	5.81	88.6	50	32.4
2012-07-29 17:59:18	27.9165	5.74	87.7	50	32.5
2012-07-29 18:59:18	27.8055	5.68	86.6	50.1	32.5
2012-07-29 19:59:18	27.8055	5.7	86.9	50	32.5
2012-07-29 20:59:18	27.6945	5.74	87.4	50.1	32.5
2012-07-29 21:59:18	27.75	5.74	87.4	49.9	32.4
2012-07-29 22:59:18	27.639	5.73	87.1	49.9	32.4
2012-07-29 23:59:18	27.8055	5.77	88	50	32.5
2012-07-30 00:59:18	27.861	5.78	88.3	50.1	32.5
2012-07-30 01:59:18	27.861	5.76	88	50	32.5
2012-07-30 02:59:18	27.6945	5.84	88.9	50.1	32.4
2012-07-30 03:59:18	27.6945	5.8	88.3	50.1	32.4
2012-07-30 04:59:18	27.75	5.83	88.9	50.1	32.5
2012-07-30 05:59:18	27.861	5.8	88.6	50	32.5
2012-07-30 06:59:18	27.8055	5.83	88.9	50	32.5
2012-07-30 07:59:18	27.6945	5.91	90	50.1	32.5
2012-07-30 08:59:18	27.6945	5.87	89.4	49.9	32.5
2012-07-30 09:59:18	27.75	5.91	90	50.2	32.5
2012-07-30 10:59:18	27.861	5.87	89.7	50.1	32.6
2012-07-30 11:59:18	27.75	5.79	88.3	50	32.5
2012-07-30 12:59:18	27.861	5.46	83.4	50.2	32.7
2012-07-30 13:59:18	27.8055	5.72	87.4	50.3	32.7
2012-07-30 14:59:18	27.75	5.79	88.3	50.1	32.6
2012-07-30 15:59:18	27.639	5.78	88	50.3	32.5
2012-07-30 16:59:18	27.639	5.81	88.3	50.3	32.5
2012-07-30 17:59:18	27.639	5.84	88.9	50.2	32.5
2012-07-30 18:59:18	27.75	5.85	89.1	50.1	32.5
2012-07-30 19:59:18	27.861	5.82	88.9	50.2	32.7
2012-07-30 20:59:18	27.8055	5.85	89.4	50.3	32.7
2012-07-30 21:59:18	27.75	5.78	88.3	50.2	32.7
2012-07-30 22:59:18	27.75	5.8	88.3	50.3	32.6
2012-07-30 23:59:18	27.639	5.86	89.1	50.3	32.6
2012-07-31 00:59:18	27.75	5.86	89.4	50.2	32.5
2012-07-31 01:59:18	27.861	5.85	89.4	50.3	32.7
2012-07-31 02:59:18	27.861	5.91	90.3	50.2	32.7
2012-07-31 03:59:18	27.75	5.92	90.3	50.2	32.6
2012-07-31 04:59:18	27.639	5.94	90.3	50.3	32.7
2012-07-31 05:59:18	27.5835	5.98	90.9	50.4	32.6
2012-07-31 06:59:18	27.861	5.93	90.6	50.2	32.7
2012-07-31 07:59:18	27.861	5.89	90	50.3	32.6
2012-07-31 08:59:18	27.6945	5.93	90.3	50.3	32.7
2012-07-31 09:59:18	27.639	5.97	90.9	50.3	32.6
2012-07-31 10:59:18	27.639	5.98	90.9	50.2	32.5
2012-07-31 11:59:18	27.861	5.82	88.9	50.2	32.6
2012-07-31 12:59:18	27.639	5.92	90	50.1	32.5
2012-07-31 13:59:18	27.8055	5.96	90.9	50.2	32.7
2012-07-31 14:59:18	26.64	5.98	74.9	1.492	0.8
2012-07-31 15:59:18	28.416	5.67	87.4	49.6	32.5
2012-07-31 16:59:18	28.416	5.75	88.6	49.6	32.5
2012-07-31 17:59:18	28.3605	5.91	90.9	49.6	32.5
2012-07-31 18:59:18	28.305	5.92	91.1	49.6	32.5
2012-07-31 19:59:18	28.2495	5.9	90.6	49.7	32.5
2012-07-31 20:59:18	28.194	5.92	90.9	49.7	32.5
2012-07-31 21:59:18	28.083	5.94	90.9	49.7	32.5
2012-07-31 22:59:18	28.083	5.92	90.6	49.6	32.4
2012-07-31 23:59:18	28.0275	5.95	91.1	49.6	32.4
2012-08-01 00:59:18	27.972	5.98	91.4	49.6	32.4
2012-08-01 01:59:18	27.9165	5.97	91.1	49.7	32.3
2012-08-01 02:59:18	27.861	5.98	91.1	49.6	32.2
2012-08-01 03:59:18	27.639	6.03	91.4	49.7	32.2
2012-08-01 04:59:18	27.75	6.04	91.7	49.6	31.9
2012-08-01 05:59:18	27.528	6.05	91.7	49.7	31.8
2012-08-01 06:59:18	27.861	6.04	92	49.7	32.2
2012-08-01 07:59:18	27.861	6	91.4	49.7	31.9
2012-08-01 10:00:14	27.75	6.04	91.7	49.6	31.9
2012-08-01 11:00:14	27.6945	6.05	91.7	49.7	31.8
2012-08-01 12:00:14	27.639	6	90.9	49.6	31.9
2012-08-01 13:00:14	27.9165	5.99	91.4	49.7	32.3
2012-08-01 14:00:14	27.8055	5.97	90.9	49.6	32.2
2012-08-01 15:00:14	27.75	5.99	90.9	49.5	31.9
2012-08-01 16:00:14	27.6945	6.03	91.4	49.6	31.9
2012-08-01 17:00:14	27.639	6	90.9	49.6	31.8
2012-08-01 18:00:14	27.8055	5.98	91.1	49.7	32.3
2012-08-01 19:00:14	27.8055	5.91	90	49.6	32.2
2012-08-01 20:00:14	27.75	5.95	90.3	49.6	31.9
2012-08-01 21:00:14	27.6945	5.97	90.6	49.6	31.8
2012-08-01 22:00:14	27.639	5.85	88.6	49.6	31.8
2012-08-01 23:00:14	27.9165	5.75	87.7	49.7	32.2
2012-08-02 00:00:14	27.861	5.82	88.6	49.7	32.2
2012-08-02 01:00:14	27.75	5.89	89.4	49.6	31.9
2012-08-02 02:00:14	27.639	5.9	89.4	49.7	31.9
2012-08-02 03:00:14	27.639	5.96	90.3	49.7	31.8
2012-08-02 04:00:14	27.861	5.94	90.6	49.7	32.3
2012-08-02 05:00:14	27.75	6.01	91.4	49.7	32.2
2012-08-02 06:00:14	27.75	5.97	90.6	49.6	31.9
2012-08-02 07:00:14	27.75	6.02	91.1	49.7	31.8
2012-08-02 08:00:14	27.639	5.97	90.6	49.6	31.8
2012-08-02 09:00:14	27.8055	5.98	91.1	49.7	32.3
2012-08-02 10:00:14	27.8055	5.97	90.9	49.7	32.2
2012-08-02 11:00:14	27.6945	5.97	90.6	49.7	31.9
2012-08-02 12:00:14	27.5835	6.01	91.1	49.6	31.8
2012-08-02 13:00:14	27.8055	6.02	91.7	49.7	32.2
2012-08-02 14:00:14	27.8055	6	91.4	49.6	32.2
2012-08-02 15:00:14	27.6945	6.05	91.7	49.7	31.9
2012-08-02 16:00:14	27.639	6.04	91.7	49.7	31.9
2012-08-02 17:00:14	27.861	5.99	91.4	49.7	32.3
2012-08-02 18:00:14	27.8055	5.95	90.6	49.7	32.3
2012-08-02 19:00:14	27.6945	6.01	91.4	49.7	32.2
2012-08-02 20:00:14	27.6945	6.06	92	49.7	31.9
2012-08-02 21:00:14	27.639	6.07	92	49.7	31.9
2012-08-02 22:00:14	27.639	6.01	91.1	49.7	31.9
2012-08-02 23:00:14	27.861	6.01	91.7	49.7	32.3
2012-08-03 00:00:14	27.861	6.02	91.7	49.8	32.3
2012-08-03 01:00:14	27.75	6.04	91.7	49.7	31.9
2012-08-03 02:00:14	27.5835	6.17	93.4	49.7	31.9
2012-08-03 03:00:14	27.639	6.13	92.9	49.7	31.9
2012-08-03 04:00:14	27.861	6.07	92.6	49.7	32.3
2012-08-03 05:00:14	27.8055	6.08	92.6	49.8	32.3
2012-08-03 06:00:14	27.75	6.09	92.6	49.7	32.2
2012-08-03 07:00:14	27.639	6.13	92.9	49.7	31.9
2012-08-03 08:00:14	27.6945	6.17	93.7	49.7	32.2
2012-08-03 09:00:14	27.861	6.09	92.9	49.7	32.3
2012-08-03 10:00:14	27.75	6.14	93.4	49.8	32.3
2012-08-03 11:00:14	27.6945	6.17	93.7	49.7	32.2
2012-08-03 12:00:14	27.5835	6.15	93.4	49.7	31.9
2012-08-03 13:00:14	27.75	6.12	93.1	49.7	32.2
2012-08-03 14:00:14	27.9165	6.13	93.4	49.8	32.3
2012-08-03 15:00:14	27.861	6.11	93.1	49.7	32.3
2012-08-03 16:00:14	27.8055	6.13	93.4	49.7	32.3
2012-08-03 17:00:14	27.6945	6.14	93.4	49.7	32.2
2012-08-03 18:00:14	27.6945	6.17	93.7	49.7	32.2
2012-08-03 19:00:14	27.639	6.18	93.7	49.7	31.9
2012-08-03 20:00:14	27.8055	6.18	94	49.8	32.3
2012-08-03 21:00:14	27.9165	6.16	93.7	49.8	32.3
2012-08-03 22:00:14	27.75	6.11	93.1	49.7	32.3
2012-08-03 23:00:14	27.75	6.12	93.1	49.7	32.2
2012-08-04 00:00:14	27.639	6.17	93.4	49.7	31.9
2012-08-04 01:00:14	27.75	6.12	93.1	49.8	32.2
2012-08-04 02:00:14	27.8055	6.13	93.4	49.7	32.3
2012-08-04 03:00:14	27.75	6.16	93.7	49.8	32.3
2012-08-04 04:00:14	27.6945	6.18	94	49.8	32.2
2012-08-04 05:00:14	27.5835	6.19	93.7	49.7	31.9
2012-08-04 06:00:14	27.75	6.14	93.4	49.8	32.3
2012-08-04 07:00:14	27.861	6.15	93.7	49.7	32.3
2012-08-04 08:00:14	27.6945	6.13	93.4	49.8	32.3
2012-08-04 09:00:14	27.6945	6.17	93.7	49.8	31.9
2012-08-04 10:00:14	27.6945	6.17	93.7	49.7	31.9
2012-08-04 11:00:14	27.8055	6.17	94	49.8	32.3
2012-08-04 12:00:14	27.861	6.15	93.7	49.7	32.3
2012-08-04 13:00:14	27.75	6.2	94.3	49.8	32.3
2012-08-04 14:00:14	27.75	6.18	94	49.7	32.2
2012-08-04 15:00:14	27.75	6.14	93.4	49.7	32.2
2012-08-04 16:00:14	27.639	6.2	94	49.7	31.9
2012-08-04 17:00:14	27.861	6.16	94	49.8	32.4
2012-08-04 18:00:14	27.8055	6.17	94	49.8	32.3
2012-08-04 19:00:14	27.75	6.16	93.7	49.7	32.2
2012-08-04 20:00:14	27.6945	6.18	93.7	49.7	31.9
2012-08-04 21:00:14	27.639	6.15	93.4	49.7	31.9
2012-08-04 22:00:14	27.861	6.1	93.1	49.8	32.4
2012-08-04 23:00:14	27.8055	6.15	93.7	49.8	32.3
2012-08-05 00:00:14	27.6945	6.22	94.6	49.8	32.2
2012-08-05 01:00:14	27.639	6.18	93.7	49.7	31.9
2012-08-05 02:00:14	27.75	6.18	94	49.8	32.3
2012-08-05 03:00:14	27.861	6.21	94.6	49.8	32.3
2012-08-05 04:00:14	27.75	6.2	94.3	49.8	32.3
2012-08-05 05:00:14	27.6945	6.19	94	49.8	31.9
2012-08-05 06:00:14	27.639	6.2	94	49.7	31.9
2012-08-05 07:00:14	27.9165	6.18	94.3	49.8	32.4
2012-08-05 08:00:14	27.8055	6.18	94	49.8	32.3
2012-08-05 09:00:14	27.75	6.18	94	49.8	32.3
2012-08-05 10:00:14	27.6945	6.18	94	49.7	32.2
2012-08-05 11:00:14	27.639	6.27	95.1	49.8	31.9
2012-08-05 12:00:14	27.9165	6.16	94	49.8	32.4
2012-08-05 13:00:14	27.861	6.18	94.3	49.8	32.3
2012-08-05 14:00:14	27.75	6.21	94.6	49.8	32.3
2012-08-05 15:00:14	27.639	6.22	94.6	49.8	32.3
2012-08-05 16:00:14	27.639	6.15	93.4	49.8	32.2
2012-08-05 17:00:14	27.6945	6.14	93.4	49.8	32.3
2012-08-05 18:00:14	27.861	6.14	93.7	49.8	32.4
2012-08-05 19:00:14	27.861	6.09	92.9	49.7	32.3
2012-08-05 20:00:14	27.75	6.14	93.4	49.8	32.3
2012-08-05 21:00:14	27.6945	6.15	93.4	49.8	32.2
2012-08-05 22:00:14	27.5835	6.08	92.3	49.7	32.2
2012-08-05 23:00:14	27.8055	6.07	92.6	49.7	32.4
2012-08-06 00:00:14	27.861	6.09	92.9	49.9	32.4
2012-08-06 01:00:14	27.8055	6.11	93.1	49.7	32.3
2012-08-06 02:00:14	27.6945	6.2	94.3	49.7	32.2
2012-08-06 03:00:14	27.639	6.19	94	49.8	31.9
2012-08-06 04:00:14	27.8055	6.21	94.6	49.9	32.4
2012-08-06 05:00:14	27.9165	6.13	93.4	49.8	32.4
2012-08-06 06:00:14	27.75	6.18	94	49.8	32.3
2012-08-06 07:00:14	27.639	6.19	94	49.8	32.3
2012-08-06 08:00:14	27.639	6.17	93.7	49.8	32.2
2012-08-06 09:00:14	27.861	6.14	93.7	49.8	32.4
2012-08-06 10:00:14	27.861	6.17	94	49.9	32.4
2012-08-06 11:00:14	27.8055	6.17	94	49.8	32.3
2012-08-06 12:00:14	27.6945	6.22	94.6	49.8	32.3
2012-08-06 13:00:14	27.639	6.26	94.9	49.8	32.2
2012-08-08 10:01:11	27.5835	6.13	93.1	49.8	32.3
2012-08-08 11:01:11	27.6945	6.16	93.7	49.9	32.4
2012-08-08 12:01:11	27.75	6.08	92.6	49.9	32.4
2012-08-08 13:01:11	27.861	5.96	90.9	49.9	32.4
2012-08-08 14:01:11	27.75	6	91.4	49.9	32.4
2012-08-08 15:01:11	27.75	6.04	92	49.9	32.3
2012-08-08 16:01:11	27.6945	6.11	92.9	49.8	32.3
2012-08-08 17:01:11	27.639	6.1	92.6	49.8	32.3
2012-08-08 18:01:11	27.5835	6.1	92.6	49.8	32.3
2012-08-08 19:01:11	27.861	6.08	92.6	49.9	32.4
2012-08-08 20:01:11	27.861	6.01	91.7	49.8	32.4
2012-08-08 21:01:11	27.75	6.06	92.3	49.8	32.4
2012-08-08 22:01:11	27.75	6.04	92	49.9	32.3
2012-08-08 23:01:11	27.6945	6.03	91.7	49.8	32.3
2012-08-09 00:01:11	27.6945	6.03	91.7	49.8	32.3
2012-08-09 01:01:11	27.861	6.07	92.6	49.9	32.4
2012-08-09 02:01:11	27.8055	6.04	92.3	49.8	32.4
2012-08-09 03:01:11	27.6945	6.11	92.9	49.8	32.4
2012-08-09 04:01:11	27.5835	6.1	92.6	49.8	32.3
2012-08-09 05:01:11	27.75	6.08	92.6	49.9	32.4
2012-08-09 06:01:11	27.75	6.08	92.6	49.8	32.4
2012-08-09 07:01:11	27.639	6.09	92.6	49.9	32.4
2012-08-09 08:01:11	27.639	6.08	92.3	49.8	32.3
2012-08-09 09:01:11	27.6945	6.1	92.6	49.9	32.3
2012-08-09 10:01:11	27.861	6	91.7	49.8	32.4
2012-08-09 11:01:11	27.861	6.03	92	49.9	32.4
2012-08-09 12:01:11	27.75	5.99	91.1	49.9	32.4
2012-08-09 13:01:11	27.639	6.04	91.7	49.8	32.3
2012-08-09 14:01:11	27.75	6.02	91.7	49.9	32.4
2012-08-09 15:01:11	27.8055	6	91.4	49.9	32.4
2012-08-09 16:01:11	27.639	6.03	91.7	49.8	32.4
2012-08-09 17:01:11	27.639	6	91.1	49.8	32.3
2012-08-09 18:01:11	27.8055	6.02	91.7	49.9	32.4
2012-08-09 19:01:11	27.75	6.04	92	49.9	32.4
2012-08-09 20:01:11	27.639	5.98	91.1	49.9	32.4
2012-08-09 21:01:11	27.6945	6.01	91.4	49.9	32.3
2012-08-09 22:01:11	27.639	6	91.1	49.8	32.3
2012-08-09 23:01:11	27.75	6	91.4	49.9	32.4
2012-08-10 00:01:11	27.861	5.97	91.1	49.9	32.4
2012-08-10 01:01:11	27.6945	6.02	91.7	49.9	32.4
2012-08-10 02:01:11	27.639	6.03	91.7	49.9	32.4
2012-08-10 03:01:11	27.639	6.04	91.7	49.9	32.3
2012-08-10 04:01:11	27.75	6.02	91.7	49.9	32.4
2012-08-10 05:01:11	27.8055	6	91.4	50	32.4
2012-08-10 06:01:11	27.75	6.05	92	49.9	32.4
2012-08-10 07:01:11	27.6945	6.05	92	49.8	32.4
2012-08-10 08:01:11	27.5835	6.05	91.7	49.9	32.3
2012-08-10 09:01:11	27.75	5.98	91.1	49.9	32.4
2012-08-10 10:01:11	27.861	5.97	91.1	49.9	32.4
2012-08-10 11:01:11	27.75	5.98	91.1	49.9	32.4
2012-08-10 12:01:11	27.6945	6.01	91.4	49.8	32.4
2012-08-10 13:01:11	27.6945	6.03	91.7	49.8	32.4
2012-08-10 14:01:11	27.861	5.97	91.1	50	32.5
2012-08-10 15:01:11	27.861	5.98	91.1	49.9	32.4
2012-08-10 16:01:11	27.75	5.98	91.1	49.9	32.4
2012-08-10 17:01:11	27.75	5.97	90.9	49.9	32.4
2012-08-10 18:01:11	27.6945	6	91.1	49.9	32.3
2012-08-10 19:01:11	27.75	6.03	91.7	49.9	32.4
2012-08-15 10:02:07	27.639	5.98	91.1	50.3	32.6
2012-08-15 11:02:07	27.6945	6.02	91.7	50.4	32.7
2012-08-15 12:02:07	27.861	5.95	90.9	50.5	32.7
2012-08-15 13:02:07	27.6945	5.97	90.9	50.3	32.6
2012-08-15 14:02:07	27.972	5.75	88	50.1	32.7
2012-08-15 15:02:07	27.9165	5.71	87.4	50.3	32.7
2012-08-15 16:02:07	27.861	5.61	85.7	50.2	32.7
2012-08-15 17:02:07	27.8055	5.94	90.3	49.2	31.7
2012-08-15 18:02:07	27.75	5.99	90.9	49.3	31.7
2012-08-15 19:02:07	27.6945	5.99	90.9	49.2	31.6
2012-08-15 20:02:07	27.6945	5.96	90.3	49	31.5
2012-08-15 21:02:07	27.639	5.99	90.6	49.2	31.6
2012-08-15 22:02:07	27.75	5.95	90.3	49.2	31.6
2012-08-15 23:02:07	27.861	5.96	90.6	49.2	31.7
2012-08-16 00:02:07	27.6945	6.01	91.1	49.3	31.6
2012-08-16 01:02:07	27.6945	6.04	91.4	49.1	31.5
2012-08-16 02:02:07	27.75	6.03	91.4	49.1	31.5
2012-08-16 03:02:07	27.861	6.01	91.4	49.1	31.7
2012-08-16 04:02:07	27.861	6.06	92	49.2	31.6
2012-08-16 05:02:07	27.75	6.05	91.7	49	31.5
2012-08-16 06:02:07	27.6945	6.06	91.7	49.1	31.4
2012-08-16 07:02:07	27.75	6.09	92.3	49.3	31.6
2012-08-16 08:02:07	27.861	6.04	91.7	49.1	31.7
2012-08-16 09:02:07	27.861	6.06	92	49	31.5
2012-08-16 10:02:07	27.639	6.1	92.3	49.1	31.5
2012-08-16 11:02:07	27.5835	6.09	92	49.3	31.5
2012-08-16 12:02:07	27.861	5.98	90.9	49.3	31.6
2012-08-16 13:02:07	27.861	5.98	90.9	49.2	31.7
2012-08-16 14:02:07	27.75	5.99	90.9	49.3	31.6
2012-08-16 15:02:07	27.639	6.01	90.9	49.3	31.7
2012-08-16 16:02:07	27.6945	5.98	90.6	49.4	31.7
2012-08-16 17:02:07	27.8055	5.94	90.3	49.4	31.7
2012-08-16 18:02:07	27.861	5.92	90	49.2	31.7
2012-08-16 19:02:07	27.8055	5.95	90.3	49.3	31.7
2012-08-16 20:02:07	27.75	5.99	90.9	49.3	31.7
2012-08-16 21:02:07	27.75	6	90.9	49.3	31.5
2012-08-16 22:02:07	27.75	5.92	89.7	49.1	31.5
2012-08-16 23:02:07	27.861	5.94	90.3	49.2	31.7
2012-08-17 00:02:07	27.8055	5.99	90.9	49.3	31.7
2012-08-17 01:02:07	27.8055	6.03	91.4	49.3	31.6
2012-08-17 02:02:07	27.5835	6.03	91.1	49.3	31.5
2012-08-17 03:02:07	27.6945	6.02	91.1	49.2	31.5
2012-08-17 04:02:07	27.861	6.01	91.4	49.2	31.7
2012-08-17 05:02:07	27.8055	6.01	91.1	49.2	31.6
2012-08-17 06:02:07	27.639	6.04	91.4	49.1	31.6
2012-08-17 07:02:07	27.639	6.06	91.7	49.1	31.5
2012-08-17 08:02:07	27.75	6.07	92	49.2	31.5
2012-08-17 09:02:07	27.861	6.05	92	49.1	31.7
2012-08-17 10:02:07	27.639	6.08	92	49.2	31.7
2012-08-17 11:02:07	27.639	6.08	92	49.2	31.7
2012-08-17 12:02:07	27.5835	6.08	92	49.2	31.6
2012-08-17 13:02:07	27.5835	6.13	92.6	49.3	31.5
2012-08-17 14:02:07	27.8055	6.08	92.3	49.4	31.8
2012-08-17 15:02:07	27.8055	6.1	92.6	49.3	31.7
2012-08-17 16:02:07	27.75	6.11	92.6	49.3	31.6
2012-08-17 17:02:07	27.639	6.14	92.9	49.3	31.5
2012-08-17 18:02:07	27.6945	6.14	92.9	49.2	31.5
2012-08-17 19:02:07	27.6945	6.15	93.1	49.3	31.6
2012-08-17 20:02:07	27.861	6.12	92.9	49.2	31.6
2012-08-17 21:02:07	27.75	6.11	92.6	49.3	31.7
2012-08-17 22:02:07	27.75	6.09	92.3	49.2	31.7
2012-08-17 23:02:07	27.5835	6.09	92	49.1	31.5
2012-08-18 00:02:07	27.639	6.14	92.9	49.3	31.6
2012-08-18 01:02:07	27.9165	6.11	92.9	49.2	31.7
2012-08-18 02:02:07	27.8055	6.12	92.9	49.2	31.7
2012-08-18 03:02:07	27.75	6.13	92.9	49.2	31.6
2012-08-18 04:02:07	27.6945	6.13	92.9	49.3	31.5
2012-08-18 05:02:07	27.639	6.14	92.9	49.1	31.5
2012-08-18 06:02:07	27.861	6.1	92.6	49.2	31.6
2012-08-18 07:02:07	27.9165	6.11	92.9	49.2	31.7
2012-08-18 08:02:07	27.75	6.13	92.9	49.2	31.6
2012-08-18 09:02:07	27.6945	6.12	92.6	49.2	31.5
2012-08-18 10:02:07	27.639	6.15	93.1	49.2	31.6
2012-08-18 11:02:07	27.6945	6.15	93.1	49.1	31.6
2012-08-18 12:02:07	27.861	6.07	92.3	49.2	31.7
2012-08-18 13:02:07	27.8055	6.13	93.1	49.3	31.7
2012-08-18 14:02:07	27.75	6.14	93.1	49.2	31.6
2012-08-18 15:02:07	27.6945	6.13	92.9	49.3	31.6
2012-08-18 16:02:07	27.639	6.14	92.9	49.2	31.5
2012-08-18 17:02:07	27.8055	6.13	93.1	49.2	31.6
2012-08-18 18:02:07	27.861	6.18	94	49.2	31.7
2012-08-18 19:02:07	27.8055	6.16	93.4	49.3	31.7
2012-08-18 20:02:07	27.75	6.14	93.1	49.1	31.5
2012-08-18 21:02:07	27.639	6.17	93.4	49.1	31.5
2012-08-18 22:02:07	27.6945	6.17	93.4	49.4	31.6
2012-08-18 23:02:07	27.861	6.17	93.7	49.3	31.7
2012-08-19 00:02:07	27.8055	6.17	93.7	49.3	31.6
2012-08-19 01:02:07	27.75	6.16	93.4	49.1	31.6
2012-08-19 02:02:07	27.639	6.19	93.7	49.3	31.5
2012-08-19 03:02:07	27.639	6.21	94	49.3	31.6
2012-08-19 04:02:07	27.861	6.13	93.1	49.1	31.7
2012-08-19 05:02:07	27.6945	6.16	93.4	49.3	31.7
2012-08-19 06:02:07	27.75	6.16	93.4	49.3	31.6
2012-08-19 07:02:07	27.639	6.17	93.4	49.3	31.6
2012-08-19 08:02:07	27.6945	6.14	93.1	49.3	31.5
2012-08-19 09:02:07	27.861	6.13	93.1	49.3	31.7
2012-08-19 10:02:07	27.75	6.14	93.1	49.2	31.7
2012-08-19 11:02:07	27.75	6.14	93.1	49.3	31.6
2012-08-19 12:02:07	27.639	6.23	94.3	49.4	31.7
2012-08-19 13:02:07	27.639	6.21	94	49.3	31.7
2012-08-19 15:08:46	27.8055	6.04	91.7	49.4	31.7
2012-08-19 16:08:46	27.6945	6.08	92	49.3	31.6
2012-08-19 17:08:46	27.75	6.05	91.7	49.3	31.7
2012-08-19 18:08:46	27.861	5.99	91.1	49.2	31.7
2012-08-19 19:08:46	27.75	6.07	92	49.3	31.7
2012-08-19 20:08:46	27.75	6.03	91.4	49.3	31.6
2012-08-19 21:08:46	27.639	6.06	91.7	49.3	31.6
2012-08-19 22:08:46	27.6945	6.05	91.7	49.4	31.7
2012-08-19 23:08:46	27.861	6.03	91.7	49.3	31.7
2012-08-20 00:08:46	27.6945	6.01	91.4	49.2	31.7
2012-08-20 01:08:46	27.639	6.08	92	49.4	31.7
2012-08-20 02:08:46	27.639	6.12	92.6	49.1	31.5
2012-08-20 03:08:46	27.75	6.12	92.9	49.3	31.7
2012-08-20 04:08:46	27.8055	6.04	91.7	49.2	31.7
2012-08-20 05:08:46	27.75	6.05	91.7	49.2	31.6
2012-08-20 06:08:46	27.639	6.1	92.3	49.3	31.5
2012-08-20 07:08:46	27.6945	6.07	92	49.2	31.6
2012-08-20 08:08:46	27.861	6.03	91.7	49.4	31.7
2012-08-20 09:08:46	27.8055	6.08	92.3	49.3	31.7
2012-08-20 10:08:46	27.6945	6.12	92.6	49.4	31.6
2012-08-20 11:08:46	27.639	5.89	89.7	50.4	32.7
2012-08-20 12:08:46	27.861	5.85	88.9	49.2	31.7
2012-08-20 13:08:46	27.861	5.92	90	49.3	31.7
2012-08-20 14:08:46	27.6945	5.92	89.7	49.3	31.7
2012-08-20 15:08:46	27.6945	5.94	90	49.3	31.6
2012-08-20 16:08:46	27.5835	5.97	90.3	49.3	31.5
2012-08-20 17:08:46	27.8055	5.99	90.9	49.2	31.6
2012-08-20 18:08:46	27.861	5.93	90	49.2	31.7
2012-08-20 19:08:46	27.75	5.97	90.6	49.2	31.5
2012-08-20 20:08:46	27.6945	6.03	91.4	49.3	31.5
2012-08-20 21:08:46	27.639	5.93	89.7	49.1	31.5
2012-08-20 22:08:46	27.75	5.97	90.6	49.2	31.7
2012-08-20 23:08:46	27.972	5.97	90.9	49.2	31.7
2012-08-21 00:08:46	27.861	6.02	91.4	49.2	31.6
2012-08-21 01:08:46	27.75	6.01	91.1	49.1	31.5
2012-08-21 02:08:46	27.639	6.03	91.1	49.1	31.5
2012-08-21 03:08:46	27.75	6.05	91.7	49	31.5
2012-08-21 04:08:46	27.861	6.03	91.7	49.1	31.6
2012-08-21 05:08:46	27.8055	6	91.1	49.1	31.6
2012-08-21 06:08:46	27.6945	6.1	92.3	49.3	31.7
2012-08-21 07:08:46	27.5835	6.11	92.3	49.2	31.5
2012-08-21 08:08:46	27.6945	6.06	91.7	49	31.5
2012-08-21 09:08:46	27.8055	6.06	92	49.2	31.6
2012-08-21 10:08:46	27.8055	6.07	92	49.2	31.5
2012-08-21 11:08:46	27.75	5.96	90.3	49.2	31.7
2012-08-21 12:08:46	27.528	6	90.6	49.3	31.5
2012-08-21 13:08:46	27.8055	5.91	89.7	49.4	31.7
2012-08-21 14:08:46	27.861	5.92	90	49.3	31.7
2012-08-21 15:08:46	27.75	5.88	89.1	49.5	31.6
2012-08-21 16:08:46	27.5835	5.93	89.7	49.3	31.6
2012-08-21 17:08:46	27.75	5.87	89.1	49.2	31.7
2012-08-21 18:08:46	27.861	5.88	89.4	49.4	31.8
2012-08-21 19:08:46	27.8055	5.91	89.7	49.3	31.7
2012-08-21 20:08:46	27.75	5.9	89.4	49.2	31.5
2012-08-21 21:08:46	27.6945	5.81	88	49.2	31.6
2012-08-21 22:08:46	27.528	5.89	88.9	49.1	31.6
2012-08-21 23:08:46	27.861	5.83	88.6	49.1	31.7
2012-08-22 00:08:46	27.8055	5.86	89.1	49.3	31.6
2012-08-22 01:08:46	27.8055	5.87	89.1	49.3	31.6
2012-08-22 02:08:46	27.6945	5.94	90	49.1	31.5
2012-08-22 03:08:46	27.639	5.93	89.7	49.3	31.5
2012-08-22 04:08:46	27.861	5.9	89.7	49.2	31.6
2012-08-22 05:08:46	27.8055	5.91	89.7	49.2	31.7
2012-08-22 06:08:46	27.8055	5.95	90.3	49.2	31.7
2012-08-22 07:08:46	27.75	6	90.9	49.3	31.6
2012-08-22 10:03:03	27.639	5.99	90.6	49.3	31.6
2012-08-22 11:03:03	27.75	6.01	91.1	49.2	31.6
2012-08-22 12:03:03	27.6945	5.31	80.9	50.5	32.7
2012-08-22 13:03:03	27.5835	5.88	88.9	49.3	31.6
2012-08-22 14:03:03	27.972	5.89	89.7	49.2	31.7
2012-08-22 15:03:03	27.8055	5.85	88.9	49.3	31.7
2012-08-22 16:03:03	27.75	5.92	89.7	49.4	31.6
2012-08-22 17:03:03	27.75	5.9	89.4	49.5	31.8
2012-08-22 18:03:03	27.639	5.93	89.7	49.2	31.6
2012-08-22 19:03:03	27.8055	5.87	89.1	49.4	31.6
2012-08-22 20:03:03	27.861	5.94	90.3	49.3	31.7
2012-08-22 21:03:03	27.75	5.92	89.7	49.2	31.6
2012-08-22 22:03:03	27.75	5.92	89.7	49.2	31.5
2012-08-22 23:03:03	27.639	5.93	89.7	49.1	31.5
2012-08-23 00:03:03	27.6945	5.9	89.4	49.1	31.5
2012-08-23 01:03:03	27.861	5.95	90.3	49.1	31.7
2012-08-23 02:03:03	27.861	5.93	90	49.1	31.7
2012-08-23 03:03:03	27.75	5.98	90.6	49	31.5
2012-08-23 04:03:03	27.6945	6.02	91.1	49.1	31.5
2012-08-23 05:03:03	27.639	6.01	90.9	49	31.5
2012-08-23 06:03:03	27.8055	6	91.1	49.5	31.8
2012-08-23 07:03:03	27.861	6.04	91.7	49.2	31.6
2012-08-23 08:03:03	27.75	5.96	90.3	49.1	31.6
2012-08-23 09:03:03	27.75	6.03	91.4	49.1	31.5
2012-08-23 10:03:03	27.75	6.01	91.1	49.1	31.5
2012-08-23 11:03:03	27.639	5.91	89.4	49.2	31.5
2012-08-23 12:03:03	27.861	5.91	89.7	49.2	31.6
2012-08-23 13:03:03	27.75	5.93	90	49.3	31.6
2012-08-23 14:03:03	27.6945	5.88	89.1	49.3	31.6
2012-08-23 15:03:03	27.639	5.87	88.9	49.3	31.6
2012-08-23 16:03:03	27.861	5.81	88.3	49.4	31.7
2012-08-23 17:03:03	27.8055	5.8	88	49.4	31.7
2012-08-23 18:03:03	27.6945	5.83	88.3	49.3	31.5
2012-08-23 19:03:03	27.6945	5.87	88.9	49.2	31.7
2012-08-23 20:03:03	27.972	5.82	88.6	49.1	31.7
2012-08-23 21:03:03	27.861	5.83	88.6	49.3	31.7
2012-08-23 22:03:03	27.8055	5.82	88.3	49.1	31.7
2012-08-23 23:03:03	27.6945	5.83	88.3	49	31.5
2012-08-24 00:03:03	27.639	5.89	89.1	49.3	31.5
2012-08-24 01:03:03	27.8055	5.84	88.6	49.2	31.6
2012-08-24 02:03:03	27.8055	5.85	88.9	49.2	31.6
2012-08-24 03:03:03	27.75	5.78	87.7	49.1	31.6
2012-08-24 04:03:03	27.6945	5.94	90	49.3	31.5
2012-08-24 05:03:03	27.639	5.91	89.4	49.3	31.5
2012-08-24 06:03:03	27.75	5.92	89.7	49.3	31.6
2012-08-24 07:03:03	27.8055	5.95	90.3	49.3	31.7
2012-08-24 08:03:03	27.861	5.89	89.4	49.2	31.6
2012-08-24 09:03:03	27.6945	6	90.9	49.2	31.7
2012-08-24 10:03:03	27.639	5.99	90.6	49.3	31.6
2012-08-24 11:03:03	27.5835	6.03	91.1	49.3	31.5
2012-08-24 12:03:03	27.861	5.98	90.9	49.1	31.7
2012-08-24 13:03:03	27.861	5.96	90.6	49.1	31.7
2012-08-24 14:03:03	27.75	6.03	91.4	49.2	31.7
2012-08-24 15:03:03	27.639	6.02	91.1	49.2	31.5
2012-08-24 16:03:03	27.6945	6.06	91.7	49.2	31.5
2012-08-24 17:03:03	27.75	6.07	92	49.4	31.7
2012-08-24 18:03:03	27.972	5.98	91.1	49.2	31.7
2012-08-24 19:03:03	27.6945	6.05	92	49.2	31.7
2012-08-24 20:03:03	27.75	6.07	92	49.3	31.6
2012-08-24 21:03:03	27.6945	6.04	91.4	49.1	31.5
2012-08-24 22:03:03	27.639	6.06	91.7	49.1	31.5
2012-08-24 23:03:03	27.75	6.03	91.4	49.3	31.6
2012-08-25 00:03:03	27.861	6.04	91.7	49.3	31.7
2012-08-25 01:03:03	27.861	6.05	92	49.2	31.7
2012-08-25 02:03:03	27.75	6.05	91.7	49.3	31.6
2012-08-25 03:03:03	27.6945	6.1	92.3	49.2	31.6
2012-08-25 04:03:03	27.639	6.1	92.3	49.1	31.6
2012-08-25 05:03:03	27.861	6.1	92.6	49.2	31.6
2012-08-25 06:03:03	27.8055	6.1	92.6	49.2	31.6
2012-08-25 07:03:03	27.6945	6.11	92.6	49.3	31.7
2012-08-25 08:03:03	27.6945	6.16	93.1	49.4	31.6
2012-08-25 09:03:03	27.639	6.1	92.3	49.2	31.5
2012-08-25 10:03:03	27.8055	6.08	92.3	49.2	31.7
2012-08-25 11:03:03	27.861	6.12	92.9	49.3	31.7
2012-08-25 12:03:03	27.8055	6.1	92.6	49.2	31.7
2012-08-25 13:03:03	27.75	6.12	92.9	49.3	31.6
2012-08-25 14:03:03	27.5835	6.14	92.9	49.3	31.5
2012-08-25 15:03:03	27.6945	6.15	93.1	49.2	31.7
2012-08-25 16:03:03	27.9165	6.14	93.4	49.4	31.8
2012-08-25 17:03:03	27.861	6.11	92.9	49.2	31.7
2012-08-25 18:03:03	27.8055	6.1	92.6	49.2	31.7
2012-08-25 19:03:03	27.639	6.14	92.9	49.3	31.6
2012-08-25 20:03:03	27.5835	6.14	92.9	49.2	31.5
2012-08-25 21:03:03	27.75	6.13	92.9	49.2	31.6
2012-08-25 22:03:03	27.861	6.09	92.6	49.3	31.8
2012-08-25 23:03:03	27.75	6.14	93.1	49.3	31.7
2012-08-26 00:03:03	27.75	6.11	92.6	49.3	31.7
2012-08-26 01:03:03	27.6945	6.17	93.4	49.3	31.6
2012-08-26 02:03:03	27.639	6.15	93.1	49.3	31.6
2012-08-26 03:03:03	27.861	6.09	92.6	49.1	31.7
2012-08-26 04:03:03	27.861	6.15	93.4	49.2	31.8
2012-08-26 05:03:03	27.6945	6.14	93.1	49.3	31.6
2012-08-26 06:03:03	27.6945	6.16	93.4	49.3	31.7
2012-08-26 07:03:03	27.6945	6.13	92.9	49.3	31.7
2012-08-26 08:03:03	27.75	6.13	93.1	49.5	31.7
2012-08-26 09:03:03	27.861	6.12	93.1	49.5	31.9
2012-08-26 10:03:03	27.8055	6.12	93.1	49.6	31.8
2012-08-26 11:03:03	27.861	6.14	93.4	49.7	31.8
2012-08-26 12:03:03	27.6945	6.15	93.4	49.6	31.7
2012-08-26 13:03:03	27.639	6.03	91.4	49.5	31.9
2012-08-26 14:03:03	27.75	6.01	91.4	49.6	32.2
2012-08-26 15:03:03	27.861	5.97	91.1	49.8	32.3
2012-08-26 16:03:03	27.8055	5.97	90.9	49.7	32.3
2012-08-26 17:03:03	27.75	5.93	90.3	49.8	32.3
2012-08-26 18:03:03	27.75	5.96	90.3	49.4	31.7
2012-08-26 19:03:03	27.861	5.92	90	49.5	31.8
2012-08-26 20:03:03	27.861	5.92	90	49.4	31.9
2012-08-26 21:03:03	27.8055	5.94	90.3	49.6	31.9
2012-08-26 22:03:03	27.6945	5.9	89.4	49.4	31.7
2012-08-26 23:03:03	27.639	5.94	90	49.6	31.8
2012-08-27 00:03:03	27.639	5.98	90.6	49.6	31.7
2012-08-27 01:03:03	27.861	5.98	90.9	49.3	31.7
2012-08-27 02:03:03	27.8055	5.99	90.9	49.3	31.7
2012-08-27 03:03:03	27.6945	6	90.9	49.7	31.9
2012-08-27 04:03:03	27.6945	6.01	91.1	49.7	31.8
2012-08-27 05:03:03	27.5835	6.01	90.9	49.6	31.7
2012-08-27 06:03:03	27.8055	6.01	91.4	49.5	31.9
2012-08-27 07:03:03	27.861	5.97	90.9	49.4	31.9
2012-08-27 08:03:03	27.75	5.99	90.9	49.5	31.9
2012-08-27 09:03:03	27.6945	6.05	91.7	49.6	31.7
2012-08-27 10:03:03	27.639	6.01	91.1	49.4	31.7
2012-08-27 11:03:03	27.75	6.04	92	49.8	32.3
2012-08-27 12:03:03	27.75	6.01	91.4	49.8	32.3
2012-08-27 13:03:03	27.8055	6.04	92	49.7	32.3
2012-08-27 14:03:03	27.75	6.04	91.7	49.6	31.9
2012-08-27 15:03:03	27.639	6.07	92	49.7	31.9
2012-08-27 16:03:03	27.639	6.09	92.3	49.8	31.9
2012-08-27 17:03:03	27.8055	6.06	92.3	49.7	32.3
2012-08-27 18:03:03	27.8055	6	91.4	49.7	32.2
2012-08-27 19:03:03	27.75	6.05	92	49.5	31.9
2012-08-27 20:03:03	27.6945	6.09	92.3	49.6	31.8
2012-08-27 21:03:03	27.528	6.06	91.7	49.6	31.8
2012-08-27 22:03:03	27.8055	6.03	91.7	49.6	32.2
2012-09-12 10:05:50	27.639	6.03	92	50.8	33
2012-09-12 11:05:50	27.75	6.06	92.6	51	33
2012-09-12 12:05:50	27.9165	6.06	92.9	51.1	33.2
2012-09-12 13:05:50	27.8055	6.05	92.6	51	33.1
2012-09-12 14:05:50	27.5835	6.08	92.6	50.9	33
2012-09-12 15:05:50	27.639	6.07	92.6	51	33
2012-09-12 16:05:50	27.8055	6.07	92.9	51	33.1
2012-09-12 17:05:50	27.8055	6.07	92.9	51.1	33.2
2012-09-12 18:05:50	27.861	5.97	91.4	50.9	33
2012-09-12 19:05:50	27.639	6.05	92.3	51	33
2012-09-12 20:05:50	27.639	6.07	92.6	50.9	33
2012-09-12 21:05:50	27.639	6.03	92	50.9	33
2012-09-12 22:05:50	27.9165	6	92	50.9	33.1
2012-09-12 23:05:50	27.8055	6.05	92.6	50.9	33
2012-09-13 00:05:50	27.75	6.02	92	50.8	33
2012-09-13 01:05:50	27.5835	6.1	92.9	50.9	33
2012-09-13 02:05:50	27.75	6.11	93.4	51	33
2012-09-13 03:05:50	27.861	6.03	92.3	50.9	33
2012-09-13 04:05:50	27.861	6.01	92	50.8	33
2012-09-13 05:05:50	27.639	6.1	93.1	51	33
2012-09-13 06:05:50	27.639	6.05	92.3	50.9	33
2012-09-13 07:05:50	27.861	6.02	92.3	51	33
2012-09-13 08:05:50	27.861	6.05	92.6	51	33
2012-09-13 09:05:50	27.75	6.02	92	50.9	33
2012-09-13 10:05:50	27.639	6.05	92.3	50.9	33
2012-09-13 11:05:50	27.639	6.12	93.4	51.1	33
2012-09-13 12:05:50	27.8055	6.08	93.1	51.1	33.2
2012-09-13 13:05:50	27.75	5.99	91.7	51	33.2
2012-09-13 14:05:50	27.75	6.06	92.6	51.1	33
2012-09-13 15:05:50	27.639	5.99	91.4	51	33.1
2012-09-13 16:05:50	27.75	5.98	91.4	51.1	33.2
2012-09-13 17:05:50	27.861	5.95	91.1	51	33.2
2012-09-13 18:05:50	27.75	5.97	91.4	51	33.1
2012-09-13 19:05:50	27.6945	5.96	90.9	50.9	33.1
2012-09-13 20:05:50	27.5835	6	91.4	51.1	33
2012-09-13 21:05:50	27.75	5.93	90.6	51	33.1
2012-09-13 22:05:50	27.8055	5.9	90.3	51	33.2
2012-09-13 23:05:50	27.75	5.93	90.6	51	33.1
2012-09-14 00:05:50	27.639	5.99	91.4	51	33
2012-09-14 01:05:50	27.6945	5.99	91.4	51	33
2012-09-14 02:05:50	27.6945	5.95	90.9	50.9	33
2012-09-14 03:05:50	27.9165	6	92	51.1	33.2
2012-09-14 04:05:50	27.861	6.03	92.3	51	33.1
2012-09-14 05:05:50	27.75	6.04	92.3	51	33
2012-09-14 06:05:50	27.6945	6.05	92.3	51	33
2012-09-14 07:05:50	27.639	6.05	92.3	51.1	33.1
2012-09-14 08:05:50	27.8055	6.03	92.3	51.1	33.2
2012-09-14 09:05:50	27.861	5.97	91.4	50.9	33.1
2012-09-14 10:05:50	27.6945	6.05	92.3	51	33
2012-09-14 11:05:50	27.5835	6.02	91.7	51	33
2012-09-14 12:05:50	27.6945	5.99	91.4	50.9	33.1
2012-09-14 13:05:50	27.75	5.98	91.4	51	33.2
2012-09-14 14:05:50	27.861	6.01	92	51.1	33.2
2012-09-14 15:05:50	27.6945	6	91.7	51.1	33.1
2012-09-14 16:05:50	27.6945	6.03	92	51.1	33
2012-09-14 17:05:50	27.75	6	91.7	50.9	33
2012-09-14 18:05:50	27.9165	6	92	51.1	33.2
2012-09-14 19:05:50	27.75	6.01	92	51.1	33.2
2012-09-14 20:05:50	27.6945	6.05	92.3	51.1	33
2012-09-14 21:05:50	27.6945	5.99	91.4	50.9	33
2012-09-14 22:05:50	27.75	6	91.7	51	33
2012-09-14 23:05:50	27.861	5.95	91.1	51.1	33.2
2012-09-15 00:05:50	27.861	5.95	91.1	51	33.2
2012-09-15 01:05:50	27.75	5.98	91.4	50.9	33.1
2012-09-15 02:05:50	27.639	6.01	91.7	51	33
2012-09-15 03:05:50	27.639	6.03	92	51	33
2012-09-15 04:05:50	27.75	5.99	91.7	51	33.2
2012-09-15 05:05:50	27.8055	6.01	92	51.1	33.1
2012-09-15 06:05:50	27.75	5.98	91.4	50.9	33
2012-09-15 07:05:50	27.75	6.04	92.3	51	33
2012-09-15 08:05:50	27.75	6.04	92.3	51	33
2012-09-15 09:05:50	27.8055	6.03	92.3	51.1	33.2
2012-09-15 10:05:50	27.75	5.99	91.7	51	33.2
2012-09-15 11:05:50	27.75	6.02	92	51	33.1
2012-09-15 12:05:50	27.639	6.05	92.3	51	33
2012-09-15 13:05:50	27.639	6.09	92.9	51.1	33
2012-09-15 14:05:50	27.75	6.07	92.9	51.1	33.2
2012-09-15 15:05:50	27.75	6.07	92.9	51.1	33.2
2012-09-15 16:05:50	27.8055	6.03	92.3	51.1	33.2
2012-09-15 17:05:50	27.639	6.03	92	51	33.1
2012-09-15 18:05:50	27.639	6.05	92.3	51	33
2012-09-15 19:05:50	27.75	6.05	92.6	51.1	33.2
2012-09-15 20:05:50	27.75	6.01	92	51	33.2
2012-09-15 21:05:50	27.6945	6.02	92	51.1	33.2
2012-09-15 22:05:50	27.6945	6.05	92.3	51	33.1
2012-09-15 23:05:50	27.6945	6.03	92	51.1	33
2012-09-16 00:05:50	27.75	6.05	92.6	51.1	33.1
2012-09-16 01:05:50	27.9165	6.02	92.3	51.1	33.2
2012-09-16 02:05:50	27.861	6.05	92.6	51.1	33.1
2012-09-16 03:05:50	27.639	6.09	92.9	51	33
2012-09-16 04:05:50	27.639	6.07	92.6	51	33
2012-09-16 05:05:50	27.75	6.01	92	51	33.2
2012-09-16 06:05:50	27.8055	6.03	92.3	51	33.2
2012-09-16 07:05:50	27.8055	6.07	92.9	51	33
2012-09-16 08:05:50	27.639	6.01	91.7	50.9	33
2012-09-16 09:05:50	27.6945	6.02	92	51.1	33.2
2012-09-16 10:05:50	27.9165	5.98	91.7	51.1	33.2
2012-09-16 11:05:50	27.8055	5.99	91.7	51	33.2
2012-09-16 12:05:50	27.639	6.03	92	51.1	33.2
2012-09-16 13:05:50	27.639	6.05	92.3	51.1	33.1
2012-09-16 14:05:50	27.8055	6.01	92	51.1	33.2
2012-09-16 15:05:50	27.75	6.05	92.6	51.2	33.2
2012-09-16 16:05:50	27.6945	6	91.7	51.3	33.2
2012-09-16 17:05:50	27.639	5.99	91.4	51.2	33.2
2012-09-16 18:05:50	27.861	5.97	91.4	51.2	33.2
2012-09-16 19:05:50	27.9165	5.93	90.9	51.2	33.2
2012-09-16 20:05:50	27.75	5.94	90.9	51.1	33.2
2012-09-16 21:05:50	27.75	5.94	90.9	51.2	33.2
2012-09-16 22:05:50	27.5835	5.92	90.3	51	33.1
2012-09-16 23:05:50	27.75	5.9	90.3	51.2	33.2
2012-09-17 00:05:50	27.8055	5.92	90.6	51.1	33.2
2012-09-17 01:05:50	27.75	5.9	90.3	51.1	33.2
2012-09-17 02:05:50	27.6945	5.93	90.6	51.1	33.2
2012-09-17 03:05:50	27.5835	5.96	91.1	51	33.1
2012-09-17 04:05:50	27.75	5.88	90	51.1	33.2
2012-09-17 05:05:50	27.861	5.93	90.9	51.1	33.2
2012-09-17 06:05:50	27.75	5.92	90.6	51.2	33.2
2012-09-17 07:05:50	27.6945	5.97	91.1	51.2	33.1
2012-09-17 08:05:50	27.639	5.91	90.3	51	33.1
2012-09-17 09:05:50	27.8055	5.86	89.7	51	33.2
2012-09-17 10:05:50	27.75	5.96	91.1	51.1	33.2
2012-09-17 11:05:50	27.6945	5.95	90.9	51.2	33.2
2012-09-17 12:05:50	27.5835	5.97	91.1	51.2	33.2
2012-09-17 13:05:50	27.75	5.96	91.1	50.9	33
2012-09-17 14:05:50	27.75	5.91	90.3	50.8	33
2012-09-17 15:05:50	27.75	5.68	86.9	51.2	33.2
2012-09-17 16:05:50	27.6945	5.89	89.7	49.9	32.4
2012-09-17 17:05:50	27.861	6.07	92.6	49.9	32.4
2012-09-17 18:05:50	27.9165	6.08	92.9	49.9	32.4
2012-09-17 19:05:50	27.639	6.12	92.9	49.8	32.3
2012-09-17 20:05:50	27.5835	6.16	93.4	49.7	32.2
2012-09-17 21:05:50	27.6945	6.13	93.1	49.8	31.9
2012-09-17 22:05:50	27.4725	6.2	94	49.8	32.5
2012-09-17 23:05:50	27.306	6.24	94.3	49.7	32.4
2012-09-18 00:05:50	27.084	6.24	94	49.6	32.3
2012-09-18 01:05:50	26.973	6.3	94.6	49.6	32.2
2012-09-18 02:05:50	26.862	6.41	96	49.7	32.1
2012-09-18 03:05:50	26.751	6.39	95.4	49.5	31.9
2012-09-18 04:05:50	26.4735	6.45	96	49.5	31.8
2012-09-18 05:05:50	26.418	6.48	96.6	49.6	32.4
2012-09-18 06:05:50	26.307	6.52	96.9	49.6	32.3
2012-09-18 07:05:50	25.974	6.52	96.3	49.5	32.2
2012-09-18 08:05:50	25.974	6.54	96.6	49.6	32.1
2012-09-18 09:05:50	25.863	6.53	96.3	49.5	32.2
2012-09-19	26.2
2012-09-20	27.7
2012-09-21	27.7
2012-09-22	27.8
2012-09-23	27.8
2012-09-24	27.6
2012-09-25	27.9
2012-09-26	27.8
2012-09-27	27.4
2012-09-28	27.8
2012-09-29	27.6
2012-09-30	27.9
2012-10-01	27.7
2012-10-02
2012-10-03 10:08:34	26.529	6.27	93.7	50	32.7
2012-10-03 11:08:34	26.418	6.28	93.7	50.2	32.8
2012-10-03 12:08:34	26.2515	6.25	93.1	50.2	32.8
2012-10-03 13:08:34	26.1405	6.35	94.6	50.9	33.1
2012-10-03 14:08:34	26.1405	6.24	92.6	50	32.5
2012-10-03 15:08:34	26.0295	6.19	91.7	49.9	32.5
2012-10-03 16:08:34	26.196	6.12	90.9	50	32.5
2012-10-03 17:08:34	26.1405	6.13	90.9	49.9	32.5
2012-10-03 18:08:34	26.0295	6.06	89.7	49.9	32.5
2012-10-03 19:08:34	25.974	5.97	88.3	50	32.4
2012-10-03 20:08:34	26.085	5.88	87.1	49.9	32.4
2012-10-03 21:08:34	26.0295	5.75	85.1	49.8	32.3
2012-10-03 22:08:34	25.9185	6.09	90	49.9	32.3
2012-10-03 23:08:34	25.9185	6.25	92.3	49.8	32.3
2012-10-04 00:08:34	25.9185	6.21	91.7	49.8	32.2
2012-10-04 01:08:34	25.6965	6.37	93.7	49.8	32.2
2012-10-04 02:08:34	25.752	6.27	92.3	49.8	32.2
2012-10-04 03:08:34	25.6965	6.32	92.9	49.7	32.1
2012-10-04 04:08:34	25.5855	6.31	92.6	49.7	32
2012-10-04 05:08:34	25.641	6.33	92.9	49.8	32
2012-10-04 06:08:34	25.53	6.32	92.6	49.7	32
2012-10-04 07:08:34	25.53	6.28	92	49.6	32
2012-10-04 08:08:34	25.4745	6.35	92.9	49.6	31.9
2012-10-04 09:08:34	25.308	6.36	93.1	49.8	32.5
2012-10-04 10:08:34	25.3635	6.36	93.1	49.8	32.5
2012-10-04 11:08:34	25.308	6.36	93.1	49.9	32.6
2012-10-04 12:08:34	25.308	6.32	92.6	50.2	32.7
2012-10-04 13:08:34	25.197	6.31	92.3	50.2	32.7
2012-10-04 14:08:34	25.2525	6.31	92.3	50	32.6
2012-10-04 15:08:34	25.197	6.23	91.1	49.9	32.6
2012-10-04 16:08:34	25.2525	6.27	91.7	49.8	32.6
2012-10-04 17:08:34	25.197	6.25	91.4	49.9	32.6
2012-10-04 18:08:34	25.1415	6.33	92.3	49.9	32.5
2012-10-04 19:08:34	25.197	6.26	91.4	50	32.6
2012-10-04 20:08:34	25.1415	6.26	91.4	49.9	32.5
2012-10-04 21:08:34	25.197	6.22	90.9	49.9	32.5
2012-10-04 22:08:34	25.197	6.16	90	49.9	32.5
2012-10-04 23:08:34	25.1415	6.21	90.6	49.9	32.5
2012-10-05 00:08:34	25.1415	6.19	90.3	49.9	32.5
2012-10-05 01:08:34	25.0305	6.25	91.1	50.1	32.6
2012-10-05 02:08:34	25.086	6.21	90.6	49.8	32.5
2012-10-05 03:08:34	25.086	6.26	91.1	49.9	32.5
2012-10-05 04:08:34	24.975	6.34	92.3	50	32.5
2012-10-05 05:08:34	24.975	6.31	91.7	50	32.4
2012-10-05 06:08:34	24.975	6.26	91.1	49.8	32.4
2012-10-05 07:08:34	25.0305	6.3	91.7	49.9	32.4
2012-10-05 08:08:34	25.086	6.25	91.1	49.8	32.4
2012-10-05 09:08:34	24.864	6.31	91.4	49.9	32.4
2012-10-05 10:08:34	24.9195	6.34	92	50	32.4
2012-10-05 11:08:34	24.9195	6.26	90.9	49.8	32.4
2012-10-05 12:08:34	24.864	6.27	90.9	49.8	32.5
2012-10-05 13:08:34	24.975	6.35	92.3	50	32.4
2012-10-05 14:08:34	24.8085	6.31	91.4	49.9	32.5
2012-10-05 15:08:34	24.9195	6.34	92	49.9	32.4
2012-10-05 16:08:34	24.9195	6.32	92	49.9	32.5
2012-10-05 17:08:34	24.864	6.34	92	49.9	32.5
2012-10-05 18:08:34	24.8085	6.29	91.1	49.9	32.5
2012-10-05 19:08:34	24.8085	6.31	91.4	49.8	32.4
2012-10-05 20:08:34	24.864	6.38	92.6	50	32.5
2012-10-05 21:08:34	24.753	6.4	92.6	50	32.4
2012-10-05 22:08:34	24.753	6.43	93.1	49.8	32.4
2012-10-05 23:08:34	24.864	6.37	92.3	49.8	32.3
2012-10-06 00:08:34	24.6975	6.39	92.3	49.9	32.3
2012-10-06 01:08:34	24.864	6.41	92.9	49.8	32.4
2012-10-06 02:08:34	24.753	6.38	92.3	49.8	32.4
2012-10-06 03:08:34	24.8085	6.35	92	49.7	32.3
2012-10-06 04:08:34	24.8085	6.43	93.1	49.9	32.3
2012-10-06 05:08:34	24.6975	6.4	92.6	49.9	32.3
2012-10-06 06:08:34	24.753	6.44	93.1	49.9	32
2012-10-06 07:08:34	24.753	6.41	92.6	49.9	32.3
2012-10-06 08:08:34	24.642	6.39	92.3	49.9	32.3
2012-10-06 09:08:34	24.642	6.43	92.6	49.9	32
2012-10-06 10:08:34	24.6975	6.41	92.6	49.9	32.3
2012-10-06 11:08:34	24.642	6.39	92.3	49.7	32.3
2012-10-06 12:08:34	24.642	6.45	93.1	50	32.3
2012-10-06 13:08:34	24.642	6.46	93.1	49.8	32
2012-10-06 14:08:34	24.642	6.39	92.3	49.9	32.3
2012-10-06 15:08:34	24.753	6.38	92.3	49.8	32.3
2012-10-06 16:08:34	24.753	6.36	92	49.7	32
2012-10-06 17:08:34	24.753	6.42	92.9	50	32.3
2012-10-06 18:08:34	24.5865	6.42	92.6	49.9	32.3
2012-10-06 19:08:34	24.753	6.38	92.3	49.9	32.3
2012-10-06 20:08:34	24.642	6.43	92.6	49.9	32.3
2012-10-06 21:08:34	24.642	6.44	92.9	49.9	32.3
2012-10-06 22:08:34	24.6975	6.48	93.4	50	32
2012-10-06 23:08:34	24.5865	6.49	93.4	50	32
2012-10-07 00:08:34	24.5865	6.41	92.3	49.7	32
2012-10-07 01:08:34	24.642	6.43	92.6	49.8	32
2012-10-07 02:08:34	24.531	6.46	92.9	49.8	32
2012-10-07 03:08:34	24.642	6.45	92.9	49.9	31.9
2012-10-07 04:08:34	24.5865	6.47	93.1	49.9	32
2012-10-07 05:08:34	24.5865	6.44	92.6	49.7	31.9
2012-10-07 06:08:34	24.531	6.48	93.1	49.8	31.9
2012-10-07 07:08:34	24.4755	6.47	92.9	49.9	32
2012-10-07 08:08:34	24.5865	6.43	92.6	49.9	32
2012-10-07 09:08:34	24.531	6.5	93.4	49.9	32
2012-10-07 10:08:34	24.5865	6.46	92.9	49.8	31.9
2012-10-07 11:08:34	24.5865	6.47	93.1	49.9	32
2012-10-07 12:08:34	24.642	6.48	93.7	50.1	32
2012-10-08	24.4
2012-10-09	23.7
2012-10-10 10:09:27	23.6985	6.42	91.1	49.8	32.2
2012-10-10 11:09:27	23.5875	6.47	91.7	49.8	32.1
2012-10-10 12:09:27	23.643	6.45	91.4	49.9	32.1
2012-10-10 13:09:27	23.5875	6.5	92	49.7	32.1
2012-10-10 14:09:27	23.5875	6.47	91.7	49.8	32.1
2012-10-10 15:09:27	23.5875	6.44	91.4	49.7	32.1
2012-10-10 16:09:27	23.643	6.43	91.1	49.7	32.1
2012-10-10 17:09:27	23.5875	6.41	90.9	49.7	32.1
2012-10-10 18:09:27	23.6985	6.42	91.1	49.7	32.1
2012-10-10 19:09:27	23.643	6.47	91.7	49.8	32.1
2012-10-10 20:09:27	23.5875	6.47	91.7	49.8	32.1
2012-10-10 21:09:27	23.643	6.43	91.1	49.7	32.1
2012-10-10 22:09:27	23.5875	6.47	91.7	49.8	32.1
2012-10-10 23:09:27	23.5875	6.43	91.1	49.7	32.1
2012-10-11 00:09:27	23.6985	6.45	91.4	49.8	32.1
2012-10-11 01:09:27	23.532	6.46	91.4	49.8	32
2012-10-11 02:09:27	23.5875	6.44	91.1	49.8	32.1
2012-10-11 03:09:27	23.5875	6.44	91.1	49.6	32
2012-10-11 04:09:27	23.5875	6.46	91.4	49.7	32
2012-10-11 05:09:27	23.5875	6.4	90.6	49.7	32
2012-10-11 06:09:27	23.5875	6.37	90.3	49.6	32
2012-10-11 07:09:27	23.5875	6.37	90.3	49.6	32
2012-10-11 08:09:27	23.5875	6.44	91.1	49.7	32
2012-10-11 09:09:27	23.5875	6.42	90.9	49.7	32
2012-10-11 10:09:27	23.5875	6.42	90.9	49.7	32
2012-10-11 11:09:27	23.5875	6.44	91.1	49.7	32
2012-10-11 12:09:27	23.4765	6.4	90.6	49.6	32
2012-10-11 13:09:27	23.643	6.39	90.6	49.7	32.1
2012-10-11 14:09:27	23.532	6.48	91.7	49.7	32
2012-10-11 15:09:27	23.4765	6.43	90.9	49.7	32
2012-10-11 16:09:27	23.532	6.39	90.3	49.8	32
2012-10-11 17:09:27	23.532	6.39	90.3	49.7	32
2012-10-11 18:09:27	23.4765	6.29	88.9	49.8	32
2012-10-11 19:09:27	23.532	6.32	89.4	49.9	32.1
2012-10-11 20:09:27	23.4765	6.32	89.4	49.8	32.1
2012-10-11 21:09:27	23.5875	6.29	89.1	49.7	32.1
2012-10-11 22:09:27	23.532	6.3	89.1	49.8	32.1
2012-10-11 23:09:27	23.4765	6.35	89.7	49.9	32.1
2012-10-12 00:09:27	23.5875	6.3	89.1	49.8	32.1
2012-10-12 01:09:27	23.5875	6.29	89.1	49.8	32.1
2012-10-12 02:09:27	23.5875	6.3	89.1	49.9	32.1
2012-10-12 03:09:27	23.532	6.32	89.4	49.7	32
2012-10-12 04:09:27	23.5875	6.29	89.1	49.8	32
2012-10-12 05:09:27	23.4765	6.35	89.7	49.8	32.1
2012-10-12 06:09:27	23.5875	6.29	89.1	49.8	32.1
2012-10-12 07:09:27	23.532	6.32	89.4	49.8	32.1
2012-10-12 08:09:27	23.5875	6.33	89.7	49.8	32.1
2012-10-12 09:09:27	23.5875	6.29	89.1	49.8	32.1
2012-10-12 10:09:27	23.643	6.31	89.4	49.8	32.1
2012-10-12 11:09:27	23.5875	6.36	90	49.8	32.1
2012-10-12 12:09:27	23.5875	6.35	90	49.8	32.1
2012-10-12 13:09:27	23.532	6.36	90	49.7	32.1
2012-10-12 14:09:27	23.643	6.33	89.7	49.7	32.1
2012-10-12 15:09:27	23.643	6.33	89.7	49.7	32.1
2012-10-12 16:09:27	23.5875	6.38	90.3	49.9	32.1
2012-10-12 17:09:27	23.643	6.38	90.3	49.8	32.1
2012-10-12 18:09:27	23.5875	6.35	90	49.8	32.1
2012-10-12 19:09:27	23.6985	6.48	92	49.7	32.1
2012-10-12 20:09:27	23.754	6.3	89.4	49.7	32.1
2012-10-12 21:09:27	23.5875	6.32	89.7	49.7	32.1
2012-10-12 22:09:27	23.643	6.31	89.4	49.8	32.1
2012-10-12 23:09:27	23.6985	6.34	90	49.8	32.1
2012-10-13 00:09:27	23.5875	6.33	89.7	49.7	32.1
2012-10-13 01:09:27	23.6985	6.3	89.4	49.7	32.1
2012-10-13 02:09:27	23.6985	6.3	89.4	49.7	32.1
2012-10-13 03:09:27	23.6985	6.27	88.9	49.7	32.1
2012-10-13 04:09:27	23.6985	6.28	89.1	49.7	32.1
2012-10-13 05:09:27	23.6985	6.24	88.6	49.7	32.1
2012-10-13 06:09:27	23.6985	6.28	89.1	49.7	32.1
2012-10-13 07:09:27	23.6985	6.27	88.9	49.7	32.1
2012-10-13 08:09:27	23.6985	6.28	89.1	49.7	32.1
2012-10-13 09:09:27	23.6985	6.24	88.6	49.7	32.1
2012-10-13 10:09:27	23.643	6.27	88.9	49.8	32.1
2012-10-13 11:09:27	23.6985	6.22	88.3	49.7	32.1
2012-10-13 12:09:27	23.6985	6.27	88.9	49.8	32.1
2012-10-13 13:09:27	23.6985	6.24	88.6	49.7	32.2
2012-10-13 14:09:27	23.6985	6.24	88.6	49.9	32.2
2012-10-13 15:09:27	23.754	6.21	88.3	49.9	32.2
2012-10-13 16:09:27	23.6985	6.17	87.7	49.8	32.2
2012-10-13 17:09:27	23.6985	6.2	88	49.8	32.2
2012-10-13 18:09:27	23.754	6.17	87.7	49.8	32.2
2012-10-13 19:09:27	23.754	6.19	88	49.8	32.2
2012-10-13 20:09:27	23.754	6.17	87.7	49.8	32.2
2012-10-13 21:09:27	23.6985	6.16	87.7	49.8	32.2
2012-10-13 22:09:27	23.8095	6.14	87.4	49.8	32.2
2012-10-13 23:09:27	23.8095	6.19	88	49.8	32.2
2012-10-14 00:09:27	23.754	6.15	87.4	49.7	32.2
2012-10-14 01:09:27	23.754	6.17	87.7	49.8	32.2
2012-10-14 02:09:27	23.6985	6.4	91.1	49.8	32.2
2012-10-14 03:09:27	23.754	6.23	88.6	49.8	32.2
2012-10-14 04:09:27	23.8095	6.12	87.1	49.8	32.2
2012-10-14 05:09:27	23.8095	6.16	87.7	49.7	32.2
2012-10-14 06:09:27	23.754	6.15	87.4	49.8	32.1
2012-10-14 07:09:27	23.754	6.18	87.7	49.9	32.2
2012-10-14 08:09:27	23.754	6.09	86.6	49.8	32.2
2012-10-14 09:09:27	23.754	6.09	86.6	49.8	32.2
2012-10-14 10:09:27	23.8095	6.09	86.6	49.8	32.2
2012-10-14 11:09:27	23.8095	6.06	86.3	49.8	32.3
2012-10-14 12:09:27	23.8095	6.08	86.6	49.9	32.3
2012-10-14 13:09:27	23.8095	6.08	86.6	49.9	32.3
2012-10-14 14:09:27	23.865	6.08	86.6	49.9	32.3
2012-10-14 15:09:27	23.8095	6.02	85.7	49.9	32.3
2012-10-14 16:09:27	23.8095	5.96	84.9	49.8	32.3
2012-10-14 17:09:27	23.8095	6.01	85.4	49.9	32.3
2012-10-14 18:09:27	23.8095	5.97	84.9	49.8	32.2
2012-10-14 19:09:27	23.8095	6.02	85.7	49.7	32.2
2012-10-14 20:09:27	23.8095	5.97	84.9	49.8	32.2
2012-10-14 21:09:27	23.6985	6.01	85.4	49.9	32.2
2012-10-14 22:09:27	23.865	5.9	84	49.7	32.3
2012-10-14 23:09:27	23.8095	5.95	84.6	49.8	32.2
2012-10-15 00:09:27	23.865	5.89	84	49.7	32.2
2012-10-15 01:09:27	23.8095	5.95	84.6	49.8	32.2
2012-10-15 02:09:27	23.8095	5.95	84.6	49.8	32.2
2012-10-15 03:09:27	23.8095	5.98	85.1	49.8	32.2
2012-10-15 04:09:27	23.8095	5.95	84.6	49.8	32.2
2012-10-15 05:09:27	23.8095	5.93	84.3	49.8	32.2
2012-10-15 06:09:27	23.8095	5.91	84	49.7	32.1
2012-10-15 07:09:27	23.8095	5.91	84	49.7	32.1
2012-10-15 08:09:27	23.754	5.91	84	49.7	32.1
2012-10-15 09:09:27	23.6985	6	85.1	49.7	32.1
2012-10-15 10:09:27	23.8095	5.93	84.3	49.8	32.2
2012-10-15 11:09:27	23.6985	5.96	84.6	49.8	32.2
2012-10-15 12:09:27	23.754	5.86	83.7	51.1	33.3
2012-10-15 13:09:27	23.2545	5.88	83.1	49.6	32.5
2012-10-15 14:09:27	23.2545	5.87	82.9	49.5	32.5
2012-10-15 15:09:27	23.31	5.87	82.9	49.7	32.5
2012-10-15 16:09:27	23.2545	5.85	82.6	49.7	32.5
2012-10-15 17:09:27	23.2545	5.83	82.3	49.7	32.5
2012-10-15 18:09:27	23.3655	5.8	82	49.5	32.5
2012-10-15 19:09:27	23.3655	5.88	83.1	49.6	32.5
2012-10-15 20:09:27	23.31	5.8	82	49.5	32.5
2012-10-15 21:09:27	23.3655	5.8	82	49.6	32.4
2012-10-15 22:09:27	23.3655	5.83	82.3	49.6	32.5
2012-10-15 23:09:27	23.2545	5.85	82.6	49.6	32.5
2012-10-16 00:09:27	23.3655	5.8	82	49.6	32.5
2012-10-16 01:09:27	23.421	5.79	82	49.6	32.5
2012-10-16 02:09:27	23.31	5.88	83.1	49.6	32.5
2012-10-16 03:09:27	23.3655	5.85	82.6	49.5	32.5
2012-10-16 04:09:27	23.3655	5.8	82	49.6	32.4
2012-10-16 05:09:27	23.3655	5.8	82	49.5	32.5
2012-10-16 06:09:27	23.421	5.79	82	49.4	32.5
2012-10-16 07:09:27	23.3655	5.8	82	49.4	32.4
2012-10-16 08:09:27	23.3655	5.78	81.7	49.4	32.4
2012-10-16 09:09:27	23.421	5.8	82	49.4	32.4
2012-10-16 10:09:27	23.3655	5.8	82	49.4	32.5
2012-10-16 11:09:27	23.31	5.87	82.9	49.7	32.5
2012-10-16 12:09:27	23.3655	5.86	82.9	49.6	32.5
2012-10-16 13:09:27	23.3655	5.84	82.6	49.6	32.5
2012-10-16 14:09:27	23.3655	5.83	82.3	49.5	32.5
2012-10-16 15:09:27	23.4765	5.79	81.7	49.6	31.8
2012-10-16 16:09:27	23.3655	5.8	82	49.6	32.5
2012-10-16 17:09:27	23.421	5.75	81.4	49.7	32.6
2012-10-16 18:09:27	23.421	5.79	82	49.6	32.5
2012-10-16 19:09:27	23.421	5.75	81.4	49.6	32.5
2012-10-16 20:09:27	23.421	5.77	81.7	49.6	32.5
2012-10-16 21:09:27	23.4765	5.83	82.3	49.6	31.9
2012-10-16 22:09:27	23.421	5.73	81.1	49.6	32.5
2012-10-16 23:09:27	23.421	5.77	81.7	49.6	32.5
2012-10-17 00:09:27	23.4765	6.28	88.6	49.5	31.8
2012-10-17 01:09:27	23.3655	5.69	80.6	49.6	32.5
2012-10-17 02:09:27	23.421	5.72	80.9	49.6	32.5
2012-10-17 03:09:27	23.421	5.73	81.1	49.6	32.5
2012-10-17 04:09:27	23.532	5.72	80.9	49.6	32.5
2012-10-17 05:09:27	23.421	5.72	80.9	49.6	32.5
2012-10-17 06:09:27	23.4765	5.69	80.6	49.6	32.5
2012-10-17 07:09:27	23.421	5.69	80.3	49.5	31.8
2012-10-17 10:10:19	23.4765	5.73	80.9	49.5	31.8
2012-10-17 11:10:19	23.532	5.74	81.1	49.8	31.9
2012-10-17 12:10:19	23.532	5.8	82	49.5	31.9
2012-10-17 13:10:19	23.4765	5.73	80.9	49.7	31.9
2012-10-17 14:10:19	23.4765	5.7	80.6	49.5	31.9
2012-10-17 15:10:19	23.532	5.73	80.9	49.7	31.9
2012-10-17 16:10:19	23.4765	5.71	80.9	49.7	32.6
2012-10-17 17:10:19	23.532	5.66	80	49.5	31.9
2012-10-17 18:10:19	23.4765	5.7	80.6	49.5	31.9
2012-10-17 19:10:19	23.532	5.7	80.6	49.5	31.9
2012-10-17 20:10:19	23.532	5.7	80.6	49.5	31.9
2012-10-17 21:10:19	23.5875	5.76	81.4	49.5	31.9
2012-10-17 22:10:19	23.532	5.68	80.3	49.5	31.9
2012-10-17 23:10:19	23.4765	5.7	80.6	49.5	31.9
2012-10-18 00:10:19	23.532	5.65	80	49.5	31.9
2012-10-18 01:10:19	23.4765	5.71	80.6	49.6	31.9
2012-10-18 02:10:19	23.532	5.66	80	49.5	31.9
2012-10-18 03:10:19	23.532	6.26	88.6	49.5	31.9
2012-10-18 04:10:19	23.532	5.94	84	49.5	31.8
2012-10-18 05:10:19	23.532	5.86	82.9	49.5	31.9
2012-10-18 06:10:19	23.532	5.82	82.3	49.5	31.8
2012-10-18 07:10:19	23.532	5.78	81.7	49.5	31.9
2012-10-18 08:10:19	23.5875	5.78	81.7	49.5	31.9
2012-10-18 09:10:19	23.643	5.73	81.1	49.5	31.9
2012-10-18 10:10:19	23.532	5.75	81.4	49.5	31.9
2012-10-18 11:10:19	23.5875	5.78	81.7	49.5	31.9
2012-10-18 12:10:19	23.5875	5.82	82.3	49.5	31.9
2012-10-18 13:10:19	23.4765	5.72	80.9	49.5	31.9
2012-10-18 14:10:19	23.532	5.66	80	49.5	31.9
2012-10-18 15:10:19	23.532	5.64	79.7	49.5	31.9
2012-10-18 16:10:19	23.5875	5.67	80.3	49.7	31.9
2012-10-18 17:10:19	23.532	5.81	82	49.5	31.8
2012-10-18 18:10:19	23.532	5.58	78.9	49.4	31.9
2012-10-18 19:10:19	23.4765	5.59	78.9	49.5	31.8
2012-10-18 20:10:19	23.4765	5.63	79.4	49.4	31.8
2012-10-18 21:10:19	23.5875	5.55	78.3	49.5	31.8
2012-10-18 22:10:19	23.4765	5.59	79.1	49.6	31.8
2012-10-18 23:10:19	23.4765	5.57	78.6	49.4	31.8
2012-10-19 00:10:19	23.4765	5.5	77.7	49.5	31.9
2012-10-19 01:10:19	23.4765	5.52	78	49.5	31.9
2012-10-19 02:10:19	23.532	5.54	78.3	49.6	31.9
2012-10-19 03:10:19	23.4765	5.59	78.9	49.6	31.9
2012-10-19 04:10:19	23.421	5.55	78.6	49.5	32.6
2012-10-19 05:10:19	23.421	5.55	78.6	49.7	32.6
2012-10-19 06:10:19	23.3655	5.56	78.6	49.5	32.5
2012-10-19 07:10:19	23.3655	5.53	78	49.5	32.5
2012-10-19 08:10:19	23.4765	5.57	78.6	49.5	31.8
2012-10-19 09:10:19	23.4765	5.53	78	49.5	31.8
2012-10-19 10:10:19	23.4765	5.53	78	49.5	31.8
2012-10-19 11:10:19	23.421	5.53	78	49.5	31.8
2012-10-19 12:10:19	23.532	5.53	78	49.5	31.8
2012-10-19 13:10:19	23.3655	5.52	78	49.3	32.5
2012-10-19 14:10:19	23.4765	5.55	78.3	49.5	31.8
2012-10-19 15:10:19	23.5875	5.46	77.1	49.5	31.7
2012-10-19 16:10:19	23.4765	5.51	77.7	49.5	31.8
2012-10-20	23.6
2012-10-21	23.4
2012-10-22	23.3
2012-10-23	23.3
2012-10-24 10:11:10	23.31	4.92	69.4	49.4	32.3
2012-10-24 11:11:10	23.2545	4.92	69.4	49.5	32.4
2012-10-24 12:11:10	23.3655	4.89	69.1	49.4	32.4
2012-10-24 13:11:10	23.3655	4.89	69.1	49.4	32.4
2012-10-24 14:11:10	23.4765	4.89	69.1	49.4	31.7
2012-10-24 15:11:10	23.3655	4.89	69.1	49.4	32.4
2012-10-24 16:11:10	23.421	4.88	69.1	49.3	32.5
2012-10-24 17:11:10	23.421	4.9	69.4	49.5	32.4
2012-10-24 18:11:10	23.421	4.9	69.1	49.4	31.7
2012-10-24 19:11:10	23.421	4.89	69.1	49.4	32.4
2012-10-25	23.4
2012-10-26	23.6
2012-10-27	23.7
2012-10-28	23.7
2012-10-29	23.6
2012-10-30	22.9
2012-10-31 10:12:02	21.09	4.19	56.9	50	32.8
2012-10-31 11:12:02	21.09	4.19	57.1	49.9	32.8
2012-10-31 12:12:02	21.201	4.22	57.4	50.1	32.8
2012-10-31 13:12:02	21.09	4.2	57.1	50	32.8
2012-10-31 14:12:02	21.1455	4.18	56.9	50	32.8
2012-10-31 15:12:02	21.1455	4.16	56.6	50.1	32.8
2012-10-31 16:12:02	21.201	4.17	56.9	50.1	32.8
2012-10-31 17:12:02	21.201	4.17	56.9	50	32.9
2012-10-31 18:12:02	21.201	4.15	56.6	50	32.8
2012-10-31 19:12:02	21.2565	4.18	57.1	50	32.9
2012-10-31 20:12:02	21.2565	4.17	56.9	50.1	32.9
2012-10-31 21:12:02	21.2565	4.14	56.6	50	32.9
2012-10-31 22:12:02	21.201	4.17	56.9	50.1	32.9
2012-10-31 23:12:02	21.2565	4.09	56	49.9	32.9
2012-11-01 00:12:02	21.312	4.14	56.6	49.9	32.9
2012-11-01 01:12:02	21.312	4.12	56.3	50	32.9
2012-11-01 02:12:02	21.423	4.11	56.3	49.9	32.9
2012-11-01 03:12:02	21.3675	4.13	56.6	50	33
2012-11-01 04:12:02	21.3675	4.12	56.3	50	33
2012-11-01 05:12:02	21.312	4.16	56.9	50.1	33
2012-11-01 06:12:02	21.3675	4.11	56.3	50	33
2012-11-01 07:12:02	21.3675	4.08	55.7	50	33
2012-11-01 08:12:02	21.423	4.09	56	50.1	33
2012-11-01 09:12:02	21.423	4.11	56.3	50.1	33
2012-11-01 10:12:02	21.4785	4.08	55.7	50	32.3
2012-11-01 11:12:02	21.4785	4.05	55.4	49.9	32.3
2012-11-01 12:12:02	21.4785	4.1	56	49.9	32.3
2012-11-01 13:12:02	21.4785	4.05	55.4	49.9	32.3
2012-11-01 14:12:02	21.534	4.05	55.4	49.9	32.3
2012-11-01 15:12:02	21.534	4.07	55.7	49.9	32.3
2012-11-01 16:12:02	21.7005	4.09	56	49.9	32.3
2012-11-01 17:12:02	21.645	4.07	55.7	50	32.4
2012-11-01 18:12:02	21.5895	4.11	56.3	49.9	32.4
2012-11-01 19:12:02	21.7005	4.08	56	49.9	32.4
2012-11-01 20:12:02	21.7005	4.06	55.7	50	32.5
2012-11-01 21:12:02	21.756	4.05	55.7	49.9	32.5
2012-11-01 22:12:02	21.8115	4.15	57.1	49.9	32.5
2012-11-01 23:12:02	21.8115	4.03	55.4	49.9	32.5
2012-11-02 00:12:02	21.7005	4.06	55.7	50	32.5
2012-11-02 01:12:02	21.8115	3.99	54.9	50	32.5
2012-11-02 02:12:02	21.8115	4	55.1	50	32.5
2012-11-02 03:12:02	21.8115	3.99	54.9	49.9	32.5
2012-11-02 04:12:02	21.8115	3.99	54.9	50	32.5
2012-11-02 05:12:02	21.8115	4	55.1	50	32.5
2012-11-02 06:12:02	21.9225	4	55.1	50	32.5
2012-11-02 07:12:02	21.867	3.96	54.6	49.9	32.5
2012-11-02 08:12:02	21.9225	4.13	56.9	50	32.6
2012-11-02 09:12:02	21.867	3.96	54.6	49.9	32.5
2012-11-02 10:12:02	21.9225	3.99	55.1	50	32.6
2012-11-02 11:12:02	21.8115	3.96	54.6	50	32.6
2012-11-02 12:12:02	21.9225	3.99	55.1	50	32.6
2012-11-02 13:12:02	21.978	3.99	55.1	50	32.6
2012-11-02 14:12:02	21.9225	4.02	55.4	50	32.6
2012-11-02 15:12:02	21.978	4.04	55.7	49.8	32.5
2012-11-02 16:12:02	22.089	4.01	55.4	49.7	32.5
2012-11-02 17:12:02	22.089	4.06	56	49.8	32.5
2012-11-02 18:12:02	22.1445	4.05	56	49.8	32.6
2012-11-02 19:12:02	22.0335	4.07	56.3	49.8	32.6
2012-11-02 20:12:02	22.089	4.1	56.6	49.9	32.6
2012-11-02 21:12:02	22.0335	4.09	56.6	49.8	32.7
2012-11-02 22:12:02	22.0335	4.09	56.6	49.8	32.6
2012-11-02 23:12:02	22.089	4.06	56.3	49.7	32.6
2012-11-03 00:12:02	22.2	4.09	56.6	49.7	32.6
2012-11-03 01:12:02	22.2	4.11	56.9	49.8	32.6
2012-11-03 02:12:02	22.1445	4.08	56.6	49.8	32.7
2012-11-03 03:12:02	22.1445	4.09	56.6	49.8	32.6
2012-11-03 04:12:02	22.1445	4.11	56.9	50	32.7
2012-11-03 05:12:02	22.2555	4.08	56.6	49.9	32.7
2012-11-03 06:12:02	22.2	4.1	56.9	49.8	32.7
2012-11-03 07:12:02	22.311	4.12	57.1	50	32.7
2012-11-03 08:12:02	22.2555	4.1	56.9	50	32.7
2012-11-03 09:12:02	22.2	4.08	56.6	50	32.7
2012-11-03 10:12:02	22.2555	4.07	56.6	50	32.8
2012-11-03 11:12:02	22.311	4.11	57.1	50	32.8
2012-11-03 12:12:02	22.311	4.09	56.9	50	32.9
2012-11-03 13:12:02	22.311	4.13	57.4	50	32.9
2012-11-03 14:12:02	22.311	4.1	57.1	50.1	33
2012-11-03 15:12:02	22.4775	4.11	57.4	50.1	32.2
2012-11-03 16:12:02	22.422	4.14	57.7	50.1	33
2012-11-03 17:12:02	22.533	4.25	59.1	50.2	32.3
2012-11-03 18:12:02	22.4775	4.21	58.6	50.2	32.3
2012-11-03 19:12:02	22.533	4.16	58	50.1	32.3
2012-11-03 20:12:02	22.5885	4.18	58.3	50.1	32.4
2012-11-03 21:12:02	22.644	4.24	59.1	50.2	32.4
2012-11-03 22:12:02	22.644	4.2	58.6	50.1	32.4
2012-11-03 23:12:02	22.755	4.17	58.3	50.1	32.3
2012-11-04 00:12:02	22.644	4.4	61.4	50.1	32.4
2012-11-04 01:12:02	22.644	5.38	75.1	50.1	32.4
2012-11-04 02:12:02	22.644	17.18	240	50.1	32.4
2012-11-04 03:12:02	22.644	0	0	50.1	32.4
2012-11-04 04:12:02	22.644	0	0	50.2	32.4
2012-11-04 05:12:02	22.644	0	0	50.1	32.4
2012-11-04 06:12:02	22.6995	0	0	50.1	32.4
2012-11-04 07:12:02	22.644	0	0	50.1	32.4
2012-11-04 08:12:02	22.6995	0	0	50	32.4
2012-11-04 09:12:02	22.755	0	0	50.2	32.5
2012-11-04 10:12:02	22.6995	0	0	50.1	32.4
2012-11-04 11:12:02	22.6995	0	0	50.2	32.5
2012-11-04 12:12:02	22.5885	0	0	50.2	32.5
2012-11-04 13:12:02	22.644	0	0	50.2	32.5
2012-11-04 14:12:02	22.6995	0	0	50.1	32.4
2012-11-04 15:12:02	22.5885	0	0	50.1	32.4
2012-11-04 16:12:02	22.644	0	0	50.2	32.4
2012-11-04 17:12:02	22.644	0	0	50.1	32.3
2012-11-04 18:12:02	22.644	0	0	50	32.3
2012-11-04 19:12:02	22.5885	0	0	50.1	32.3
2012-11-04 20:12:02	22.6995	0	0	50.1	32.3
2012-11-04 21:12:02	22.5885	0	0	50.1	32.3
2012-11-04 22:12:02	22.5885	0	0	50.1	32.3
2012-11-04 23:12:02	22.644	0	0	49.9	32.3
2012-11-05 00:12:02	22.644	0	0	50.1	32.3
2012-11-05 01:12:02	22.644	0	0	50.1	32.3
2012-11-05 02:12:02	22.644	0	0	50	32.3
2012-11-05 03:12:02	22.644	0	0	50.1	32.3
2012-11-05 04:12:02	22.644	0	0	50	32.3
2012-11-05 05:12:02	22.5885	0	0	50	32.3
2012-11-05 06:12:02	22.5885	0	0	49.9	32.3
2012-11-05 07:12:02	22.5885	0	0	50	32.3
2012-11-05 08:12:02	22.533	0	0	50	32.3
2012-11-05 09:12:02	22.6995	0	0	50	32.3
2012-11-05 10:12:02	22.644	0	0	50	32.3
2012-11-05 11:12:02	22.644	0	0	50	32.3
2012-11-05 12:12:02	22.644	0	0	49.7	32.1
2012-11-05 13:12:02	21.3675	0	0	50.7	33.3
2012-11-05 14:12:02	21.0345	0	0	50.1	32.8
2012-11-05 15:12:02	21.0345	0	0	50	32.7
2012-11-05 16:12:02	21.0345	0	0	50	32.8
2012-11-06	22.7
2012-11-07 11:19:10	21.9225	0	0	49.8	32.4
2012-11-07 12:19:10	21.8115	0	0	49.9	32.5
2012-11-07 13:19:10	21.8115	0	0	49.9	32.5
2012-11-07 14:19:10	21.9225	0	0	49.9	32.5
2012-11-07 15:19:10	21.9225	0	0	49.9	32.5
2012-11-07 16:19:10	21.8115	0	0	49.9	32.5
2012-11-07 17:19:10	21.867	0	0	49.9	32.5
2012-11-07 18:19:10	21.978	0	0	49.8	32.5
2012-11-07 19:19:10	21.9225	0	0	49.9	32.5
2012-11-07 20:19:10	21.978	0	0	50	32.6
2012-11-07 21:19:10	21.978	0	0	49.9	32.6
2012-11-07 22:19:10	21.978	0	0	49.9	32.5
2012-11-07 23:19:10	21.978	0	0	50	32.5
2012-11-08 00:19:10	21.9225	0	0	50	32.6
2012-11-08 01:19:10	21.978	0	0	49.9	32.5
2012-11-08 02:19:10	21.9225	0	0	49.7	32.5
2012-11-08 03:19:10	21.978	0	0	49.8	32.6
2012-11-08 04:19:10	22.089	0	0	49.9	32.5
2012-11-08 05:19:10	21.978	0	0	49.7	32.5
2012-11-08 06:19:10	22.089	0	0	49.8	32.6
2012-11-08 07:19:10	22.089	0	0	50	32.5
2012-11-08 08:19:10	22.0335	0	0	49.8	32.5
2012-11-08 09:19:10	21.978	0	0	49.8	32.6
2012-11-08 10:19:10	22.089	0	0	50	32.5
2012-11-08 11:19:10	22.0335	0	0	49.7	32.6
2012-11-08 12:19:10	22.0335	0	0	49.9	32.6
2012-11-08 13:19:10	22.0335	0	0	49.8	32.6
2012-11-08 14:19:10	22.0335	0	0	49.8	32.6
2012-11-08 15:19:10	22.089	0	0	49.8	32.7
2012-11-08 16:19:10	22.089	0	0	49.8	32.7
2012-11-08 17:19:10	22.1445	0	0	49.7	32.7
2012-11-08 18:19:10	22.089	0	0	49.8	32.6
2012-11-08 19:19:10	22.089	0	0	49.7	32.6
2012-11-08 20:19:10	22.089	0	0	49.8	32.6
2012-11-08 21:19:10	22.0335	0	0	49.7	32.6
2012-11-08 22:19:10	22.1445	0	0	49.7	32.6
2012-11-08 23:19:10	22.089	0	0	49.8	32.6
2012-11-09 00:19:10	22.2	0	0	49.7	32.6
2012-11-09 01:19:10	22.2	0	0	49.8	32.7
2012-11-09 02:19:10	22.1445	0	0	49.7	32.6
2012-11-09 03:19:10	22.089	0	0	49.7	32.6
2012-11-09 04:19:10	22.1445	0	0	49.8	32.6
2012-11-09 05:19:10	22.1445	0	0	49.7	32.6
2012-11-09 06:19:10	22.2	0	0	49.8	32.7
2012-11-09 07:19:10	22.2	0	0	49.8	32.7
2012-11-09 08:19:10	22.2	0	0	49.9	32.7
2012-11-09 09:19:10	22.2555	0	0	50	32.7
2012-11-09 10:19:10	22.311	0	0	50.1	32.7
2012-11-09 11:19:10	22.2555	0	0	49.9	32.7
2012-11-09 12:19:10	22.2555	0	0	49.9	32.7
2012-11-09 13:19:10	22.2555	0	0	49.9	32.7
2012-11-09 14:19:10	22.2555	0	0	50	32.8
2012-11-09 15:19:10	22.2555	0	0	49.9	32.7
2012-11-09 16:19:10	22.3665	0	0	50	32.8
2012-11-09 17:19:10	22.311	0	0	50	32.8
2012-11-09 18:19:10	22.311	0	0	50	32.8
2012-11-09 19:19:10	22.311	0	0	50	32.8
2012-11-09 20:19:10	22.311	0	0	49.9	32.8
2012-11-09 21:19:10	22.311	0	0	50	32.8
2012-11-09 22:19:10	22.3665	0	0	50	32.9
2012-11-09 23:19:10	22.3665	0	0	50.1	32.9
2012-11-10 00:19:10	22.4775	0	0	50.1	33
2012-11-10 01:19:10	22.422	0	0	50.1	33
2012-11-10 02:19:10	22.3665	0	0	50.1	33
2012-11-10 03:19:10	22.4775	0	0	50	32.2
2012-11-10 04:19:10	22.4775	0	0	50.1	32.9
2012-11-10 05:19:10	22.422	0	0	50.1	33
2012-11-10 06:19:10	22.422	0	0	50	32.9
2012-11-10 07:19:10	22.422	0	0	50	33
2012-11-10 08:19:10	22.422	0	0	50.1	33
2012-11-10 09:19:10	22.422	0	0	50.1	33
2012-11-10 10:19:10	22.4775	0	0	50	32.3
2012-11-10 11:19:10	22.4775	0	0	50	32.3
2012-11-10 12:19:10	22.4775	0	0	50.1	32.3
2012-11-10 13:19:10	22.5885	0	0	50	32.2
2012-11-10 14:19:10	22.533	0	0	50	32.3
2012-11-10 15:19:10	22.4775	0	0	50.1	32.3
2012-11-10 16:19:10	22.533	0	0	50.1	32.3
2012-11-10 17:19:10	22.5885	0	0	50.2	32.3
2012-11-10 18:19:10	22.644	0	0	50.1	32.4
2012-11-10 19:19:10	22.533	0	0	50.1	32.5
2012-11-10 20:19:10	22.6995	0	0	50.2	32.5
2012-11-10 21:19:10	22.8105	0	0	50.2	32.5
2012-11-10 22:19:10	22.866	0	0	50.2	32.5
2012-11-10 23:19:10	22.755	0	0	50.3	32.5
2012-11-11 00:19:10	22.755	0	0	50.1	32.5
2012-11-11 01:19:10	22.8105	0	0	50	32.5
2012-11-11 02:19:10	22.755	0	0	50.1	32.5
2012-11-11 03:19:10	22.755	0	0	50	32.5
2012-11-11 04:19:10	22.755	0	0	50	32.5
2012-11-11 05:19:10	22.755	0	0	50.3	32.5
2012-11-11 06:19:10	22.866	0	0	50.1	32.5
2012-11-11 07:19:10	22.755	0	0	50.1	32.5
2012-11-11 08:19:10	22.755	0	0	50	32.5
2012-11-11 09:19:10	22.755	0	0	50.2	32.5
2012-11-11 10:19:10	22.755	0	0	50.1	32.5
2012-11-11 11:19:10	22.755	0	0	50.2	32.5
2012-11-11 12:19:10	22.9215	0	0	50.3	32.5
2012-11-11 13:19:10	22.866	0	0	50.2	32.5
2012-11-11 14:19:10	22.866	0	0	50.2	32.6
2012-11-11 15:19:10	22.866	0	0	50.3	32.7
2012-11-11 16:19:10	22.866	0	0	50.3	32.7
2012-11-11 17:19:10	22.9215	0	0	50.4	32.7
2012-11-11 18:19:10	22.977	0	0	50.2	32.8
2012-11-11 19:19:10	22.977	0	0	50.3	32.8
2012-11-11 20:19:10	23.088	0	0	50.3	32.8
2012-11-11 21:19:10	23.088	0	0	50.2	32.8
2012-11-11 22:19:10	23.088	0	0	50.2	32.8
2012-11-11 23:19:10	23.1435	0	0	50.2	32.8
2012-11-12 00:19:10	23.1435	0	0	50.2	32.8
2012-11-12 01:19:10	23.1435	0	0	50.2	32.8
2012-11-12 02:19:10	23.1435	0	0	50.2	32.8
2012-11-12 03:19:10	23.199	0	0	50.2	32.8
2012-11-12 04:19:10	23.199	0	0	50.2	32.8
2012-11-12 05:19:10	23.2545	0	0	50.2	32.8
2012-11-12 06:19:10	23.199	0	0	50.1	32.8
2012-11-12 07:19:10	23.2545	0	0	50.2	32.8
2012-11-12 08:19:10	23.1435	0	0	50.1	32.8
2012-11-12 09:19:10	23.199	0	0	50.2	32.8
2012-11-12 10:19:10	23.2545	0	0	50.1	32.9
2012-11-12 11:19:10	23.199	0	0	50.1	32.8
2012-11-12 12:19:10	23.2545	0	0	50.2	32.9
2012-11-12 13:19:10	23.31	0	0	50.3	33
2012-11-12 14:19:10	23.2545	0	0	50.4	33
2012-11-12 15:19:10	23.2545	0	0	50.2	33
2012-11-12 16:19:10	23.31	0	0	50.1	32.9
2012-11-12 17:19:10	23.2545	0	0	50.2	32.8
2012-11-12 18:19:10	23.199	0	0	50.3	33
2012-11-12 19:19:10	23.199	0	0	50.3	33
2012-11-12 20:19:10	23.2545	0	0	50.3	33
2012-11-12 21:19:10	23.199	0	0	50.3	33
2012-11-12 22:19:10	23.199	0	0	50.4	32.9
2012-11-12 23:19:10	23.199	0	0	50.3	32.8
2012-11-13 00:19:10	23.199	0	0	50.1	32.9
2012-11-13 01:19:10	23.199	0	0	50.1	32.8
2012-11-13 02:19:10	23.199	0	0	50.2	32.8
2012-11-13 03:19:10	23.1435	0	0	50.2	32.8
2012-11-13 04:19:10	23.1435	0	0	50.2	32.8
2012-11-13 05:19:10	23.1435	0	0	50.2	32.8
2012-11-13 06:19:10	23.1435	0	0	50.2	32.8
2012-11-13 07:19:10	23.199	0	0	50.2	32.8
2012-11-13 08:19:10	23.199	0	0	50.2	32.7
2012-11-13 09:19:10	23.1435	0	0	50.2	32.8
2012-11-13 10:19:10	23.1435	0	0	50.1	32.8
2012-11-13 11:19:10	23.199	0	0	50.1	32.7
2012-11-13 12:19:10	23.199	0	0	50.1	32.7
2012-11-13 13:19:10	23.088	0	0	50	32.7
2012-11-13 14:19:10	23.088	0	0	50.2	32.6
2012-11-13 15:19:10	23.0325	0	0	50	32.6
2012-11-13 16:19:10	23.088	0	0	51.3	33.5
2012-11-13 17:19:10	21.3675	0	0	49.9	32.9
2012-11-13 18:19:10	21.2565	0	0	49.9	32.9
2012-11-13 19:19:10	21.2565	0	0	49.9	32.9
2012-11-13 20:19:10	21.3675	0	0	49.9	32.9
2012-11-13 21:19:10	21.3675	0	0	49.9	32.9
2012-11-13 22:19:10	21.4785	0	0	49.9	32.2
2012-11-13 23:19:10	21.3675	0	0	49.8	32.8
2012-11-14 00:19:10	21.3675	0	0	49.7	32.9
2012-11-14 01:19:10	21.2565	0	0	49.9	32.9
2012-11-14 02:19:10	21.3675	0	0	49.7	32.1
2012-11-14 03:19:10	21.3675	0	0	49.8	32.8
2012-11-14 04:19:10	21.3675	0	0	49.9	32.9
2012-11-14 05:19:11	21.4785	0	0	49.9	32.2
2012-11-14 06:19:10	21.423	0	0	49.9	32.8
2012-11-14 07:19:10	21.423	0	0	49.8	32.9
2012-11-14 08:19:10	21.3675	0	0	49.8	32.8
2012-11-14 09:19:10	21.3675	0	0	49.9	32.9
2012-11-14 11:19:59	21.423	0	0	49.9	32.9
2012-11-14 12:19:59	21.423	0	0	49.9	32.9
2012-11-14 13:19:59	21.3675	0	0	49.9	32.9
2012-11-14 14:19:59	21.4785	0	0	50	32.2
2012-11-14 15:19:59	21.423	0	0	49.9	32.9
2012-11-14 16:19:59	21.423	0	0	50	32.9
2012-11-14 17:19:59	21.4785	0	0	49.9	32.9
2012-11-14 18:19:59	21.312	0	0	49.8	32.9
2012-11-14 19:19:59	21.534	0	0	49.8	32.2
2012-11-14 20:19:59	21.423	0	0	49.7	32.9
2012-11-14 21:19:59	21.423	0	0	49.9	32.8
2012-11-14 22:19:59	21.4785	0	0	49.8	32.2
2012-11-14 23:19:59	21.5895	0	0	49.8	32.1
2012-11-15 00:19:59	21.4785	0	0	49.6	32.1
2012-11-15 01:19:59	21.4785	0	0	49.7	32.1
2012-11-15 02:19:59	21.4785	0	0	49.7	32.1
2012-11-15 03:19:59	21.423	0	0	49.8	32.8
2012-11-15 04:19:59	21.4785	0	0	49.8	32.1
2012-11-15 05:19:59	21.423	0	0	49.8	32.8
2012-11-15 06:19:59	21.423	0	0	49.7	32.8
2012-11-15 07:19:59	21.4785	0	0	49.8	32.8
2012-11-15 08:19:59	21.4785	0	0	49.7	32.1
2012-11-15 09:19:59	21.4785	0	0	49.8	32.1
2012-11-15 10:19:59	21.423	0	0	49.8	32.8
2012-11-15 11:19:59	21.4785	0	0	49.8	32.8
2012-11-15 12:19:59	21.3675	0	0	49.9	32.8
2012-11-15 13:19:59	21.312	0	0	49.9	32.8
2012-11-15 14:19:59	21.423	0	0	50	32.8
2012-11-15 15:19:59	21.312	0	0	49.9	32.8
2012-11-15 16:19:59	21.3675	0	0	49.9	32.9
2012-11-15 17:19:59	21.3675	0	0	49.8	32.8
2012-11-15 18:19:59	21.312	0	0	49.8	32.1
2012-11-15 19:19:59	21.3675	0	0	49.8	32.8
2012-11-15 20:19:59	21.3675	0	0	49.9	32.9
2012-11-15 21:19:59	21.4785	0	0	49.8	32.2
2012-11-15 22:19:59	21.3675	0	0	49.9	32.8
2012-11-15 23:19:59	21.3675	0	0	49.8	32.8
2012-11-16 00:19:59	21.3675	0	0	49.7	32.8
2012-11-16 01:19:59	21.3675	0	0	49.8	32.8
2012-11-16 02:19:59	21.3675	0	0	49.8	32.8
2012-11-16 03:19:59	21.534	0	0	49.8	32.1
2012-11-16 04:19:59	21.3675	0	0	49.8	32.8
2012-11-16 05:19:59	21.534	0	0	49.8	32.1
2012-11-16 06:19:59	21.423	0	0	49.8	32.8
2012-11-16 07:19:59	21.3675	0	0	49.8	32.8
2012-11-16 08:19:59	21.3675	0	0	49.8	32.8
2012-11-16 09:19:59	21.3675	0	0	49.8	32.8
2012-11-16 10:19:59	21.4785	0	0	49.9	32.1
2012-11-16 11:19:59	21.3675	0	0	49.7	32.8
2012-11-16 12:19:59	21.423	0	0	49.9	32.9
2012-11-16 13:19:59	21.3675	0	0	49.8	32.8
2012-11-16 14:19:59	21.423	0	0	49.8	32.8
2012-11-16 15:19:59	21.423	0	0	49.8	32.8
2012-11-16 16:19:59	21.423	0	0	49.8	32.8
2012-11-16 17:19:59	21.423	0	0	49.9	32.8
2012-11-16 18:19:59	21.4785	0	0	49.9	32.2
2012-11-16 19:19:59	21.312	0	0	50	32.9
2012-11-16 20:19:59	21.4785	0	0	49.8	32.2
2012-11-16 21:19:59	21.423	0	0	49.9	32.9
2012-11-16 22:19:59	21.4785	0	0	49.8	32.2
2012-11-16 23:19:59	21.4785	0	0	49.8	32.2
2012-11-17 00:19:59	21.4785	0	0	50	32.9
2012-11-17 01:19:59	21.3675	0	0	49.8	32.9
2012-11-17 02:19:59	21.534	0	0	49.8	32.2
2012-11-17 03:19:59	21.3675	0	0	49.8	32.9
2012-11-17 04:19:59	21.4785	0	0	50.1	32.3
2012-11-17 05:19:59	21.4785	0	0	50	32.3
2012-11-17 06:19:59	21.4785	0	0	50	33
2012-11-17 07:19:59	21.534	0	0	49.9	32.3
2012-11-17 08:19:59	21.4785	0	0	50	33
2012-11-17 09:19:59	21.423	0	0	50.1	33
2012-11-17 10:19:59	21.423	0	0	50.2	33
2012-11-17 11:19:59	21.534	0	0	49.9	32.3
2012-11-17 12:19:59	21.4785	0	0	50	32.3
2012-11-17 13:19:59	21.4785	0	0	49.9	32.3
2012-11-17 14:19:59	21.4785	0	0	49.9	32.3
2012-11-17 15:19:59	21.534	0	0	49.9	32.3
2012-11-17 16:19:59	21.4785	0	0	49.9	32.3
2012-11-17 17:19:59	21.4785	0	0	49.8	32.3
2012-11-17 18:19:59	21.4785	0	0	49.9	32.3
2012-11-17 19:19:59	21.645	0	0	49.9	32.3
2012-11-17 20:19:59	21.534	0	0	49.8	32.3
2012-11-17 21:19:59	21.4785	0	0	49.7	32.3
2012-11-17 22:19:59	21.423	0	0	50	33
2012-11-17 23:19:59	21.5895	0	0	49.9	32.3
2012-11-18 00:19:59	21.534	0	0	49.9	32.3
2012-11-18 01:19:59	21.423	0	0	50	33
2012-11-18 02:19:59	21.534	0	0	50	32.3
2012-11-18 03:19:59	21.645	0	0	49.9	32.3
2012-11-18 04:19:59	21.534	0	0	49.9	32.3
2012-11-18 05:19:59	21.534	0	0	49.8	32.3
2012-11-18 06:19:59	21.5895	0	0	49.9	32.3
2012-11-18 07:19:59	21.5895	0	0	49.9	32.3
2012-11-18 08:19:59	21.534	0	0	49.8	32.3
2012-11-18 09:19:59	21.534	0	0	49.9	32.3
2012-11-18 10:19:59	21.5895	0	0	49.9	32.3
2012-11-18 11:19:59	21.534	0	0	49.9	32.3
2012-11-18 12:19:59	21.4785	0	0	49.9	32.3
2012-11-18 13:19:59	21.3675	0	0	50	33
2012-11-18 14:19:59	21.423	0	0	49.9	33
2012-11-18 15:19:59	21.534	0	0	49.9	32.3
2012-11-18 16:19:59	21.5895	0	0	49.9	32.3
2012-11-18 17:19:59	21.5895	0	0	49.9	32.3
2012-11-18 18:19:59	21.423	0	0	49.9	33
2012-11-18 19:19:59	21.4785	0	0	49.9	32.3
2012-11-19	21.4
2012-11-20	21.6
2012-11-21 11:20:49	20.3685	7.17	96.2	49.7	32.5
2012-11-21 12:20:49	20.2575	7.23	96.8	49.8	32.4
2012-11-21 13:20:49	20.313	7.32	98.1	49.8	32.5
2012-11-21 14:20:49	20.3685	7.28	97.4	49.8	32.5
2012-11-21 15:20:49	20.2575	7.23	96.8	49.8	32.5
2012-11-21 16:20:49	20.3685	7.2	96.5	49.7	32.5
2012-11-21 17:20:49	20.3685	7.2	96.5	49.8	32.5
2012-11-21 18:20:49	20.424	7.23	97.1	49.7	32.5
2012-11-21 19:20:49	20.424	7.21	96.8	49.8	32.5
2012-11-21 20:20:49	20.535	7.12	95.5	49.7	31.9
2012-11-21 21:20:49	20.4795	7.25	97.1	49.8	31.9
2012-11-21 22:20:49	20.4795	7.27	97.4	49.8	31.9
2012-11-21 23:20:49	20.535	7.14	95.8	49.7	31.9
2012-11-22 00:20:49	20.535	7.1	95.2	49.7	31.9
2012-11-22 01:20:49	20.5905	7.15	95.8	49.7	31.9
2012-11-22 02:20:49	20.535	7.18	96.2	49.7	31.9
2012-11-22 03:20:49	20.5905	7.15	95.8	49.7	31.9
2012-11-22 04:20:49	20.4795	7.24	97.1	49.7	31.9
2012-11-22 05:20:49	20.5905	7.13	95.8	49.6	31.9
2012-11-22 06:20:49	20.535	7.18	96.5	49.6	31.9
2012-11-22 07:20:49	20.4795	7.18	96.5	49.6	31.9
2012-11-22 08:20:49	20.5905	7.25	97.4	49.9	32
2012-11-22 09:20:49	20.646	7.23	97.1	49.7	32
2012-11-22 10:20:49	20.5905	7.33	98.4	49.9	32
2012-11-22 11:20:49	20.646	7.3	98.1	49.8	32
2012-11-22 12:20:49	20.757	7.31	98.1	49.9	32
2012-11-22 13:20:49	20.646	7.18	96.5	49.8	32
2012-11-22 14:20:49	20.5905	7.28	97.8	49.9	32
2012-11-22 15:20:49	20.7015	7.14	96.5	49.8	32.4
2012-11-22 16:20:49	20.8125	7.21	97.4	49.8	32.4
2012-11-22 17:20:49	20.757	7.2	97.1	49.8	32.4
2012-11-22 18:20:49	20.8125	7.14	96.5	49.8	32.4
2012-11-22 19:20:49	20.7015	7.2	97.1	49.8	32.5
2012-11-22 20:20:49	20.8125	7.12	96.2	49.9	32.5
2012-11-22 21:20:49	20.8125	7.18	97.1	49.8	32.5
2012-11-22 22:20:49	20.868	7.01	94.9	49.8	32.5
2012-11-22 23:20:49	20.868	7.08	95.8	49.8	32.5
2012-11-23 00:20:49	20.868	6.99	94.6	49.8	32.5
2012-11-23 01:20:49	20.868	6.99	94.6	49.8	32.5
2012-11-23 02:20:49	20.868	6.95	94.3	49.7	32.5
2012-11-23 03:20:49	20.868	6.97	94.3	49.8	32.5
2012-11-23 04:20:49	20.868	6.99	94.6	49.8	32.5
2012-11-23 05:20:49	20.868	7.01	94.9	49.8	32.5
2012-11-23 06:20:49	20.868	6.96	94.3	49.9	32.5
2012-11-23 07:20:49	20.8125	7.01	94.9	49.8	32.5
2012-11-23 08:20:49	20.868	7.06	95.5	49.8	32.5
2012-11-23 09:20:49	20.8125	7.08	95.8	49.9	32.5
2012-11-23 10:20:49	20.868	7.1	96.2	49.9	32.5
2012-11-23 11:20:49	20.9235	7.05	95.5	49.9	32.5
2012-11-23 12:20:49	20.9235	7.01	94.9	49.9	32.5
2012-11-23 13:20:49	20.9235	7.05	95.5	49.9	32.5
2012-11-23 14:20:49	20.868	7.14	96.5	50.1	32.6
2012-11-23 15:20:49	20.979	6.93	93.9	49.9	32.5
2012-11-23 16:20:49	20.868	6.96	94.3	49.9	32.5
2012-11-23 17:20:49	20.979	7	94.9	49.8	32.5
2012-11-23 18:20:49	20.868	6.89	93.3	49.8	32.6
2012-11-23 19:20:49	20.9235	6.93	93.9	50	32.6
2012-11-23 20:20:49	21.0345	6.83	92.7	49.9	32.6
2012-11-23 21:20:49	21.09	6.95	94.3	49.9	32.6
2012-11-23 22:20:49	21.0345	6.87	93.3	49.8	32.6
2012-11-23 23:20:49	21.0345	6.97	94.6	49.8	32.6
2012-11-24 00:20:49	20.979	6.83	92.7	49.8	32.6
2012-11-24 01:20:49	20.979	6.96	94.3	50	32.6
2012-11-24 02:20:49	20.9235	6.88	93.3	50	32.6
2012-11-24 03:20:49	21.0345	6.8	92.3	49.8	32.6
2012-11-24 04:20:49	21.0345	6.83	92.7	49.9	32.6
2012-11-24 05:20:49	20.9235	6.88	93.3	49.9	32.6
2012-11-24 06:20:49	20.979	6.83	92.7	49.8	32.6
2012-11-24 07:20:49	20.979	6.9	93.6	49.9	32.6
2012-11-24 08:20:49	20.979	6.92	93.9	49.8	32.5
2012-11-24 09:20:49	20.979	6.95	94.3	49.8	32.5
2012-11-24 10:20:49	21.09	6.85	93	49.8	32.6
2012-11-24 11:20:49	20.979	6.9	93.6	49.8	32.5
2012-11-24 12:20:49	21.0345	6.89	93.6	49.7	32.6
2012-11-24 13:20:49	21.0345	6.92	93.9	49.9	32.6
2012-11-24 14:20:49	20.9235	6.9	93.6	49.9	32.6
2012-11-24 15:20:49	21.0345	6.92	93.9	49.9	32.6
2012-11-24 16:20:49	21.0345	6.87	93.3	49.8	32.6
2012-11-24 17:20:49	20.979	6.97	94.6	49.8	32.6
2012-11-24 18:20:49	21.0345	6.88	93.3	50	32.6
2012-11-24 19:20:49	21.1455	6.8	92.3	49.8	32.6
2012-11-24 20:20:49	21.09	6.8	92.3	49.9	32.6
2012-11-24 21:20:49	21.0345	6.77	92	49.9	32.7
2012-11-24 22:20:49	21.09	6.83	92.7	49.8	32.7
2012-11-24 23:20:49	21.09	6.79	92.3	49.9	32.6
2012-11-25 00:20:49	21.09	6.77	92	49.9	32.6
2012-11-25 01:20:49	20.979	6.83	92.7	49.9	32.6
2012-11-25 02:20:49	20.979	6.78	92	49.9	32.6
2012-11-25 03:20:49	21.0345	6.75	91.7	49.9	32.6
2012-11-25 04:20:49	21.09	6.67	90.7	49.8	32.6
2012-11-25 05:20:49	21.09	6.75	91.7	49.8	32.6
2012-11-25 06:20:49	21.0345	6.71	91.1	49.8	32.6
2012-11-25 07:20:49	21.09	6.72	91.4	49.8	32.6
2012-11-25 08:20:49	21.09	6.82	92.7	49.8	32.6
2012-11-25 09:20:49	21.0345	6.79	92.3	49.8	32.6
2012-11-25 10:20:49	21.09	6.72	91.4	49.8	32.6
2012-11-25 11:20:49	21.09	6.72	91.4	49.7	32.6
2012-11-25 12:20:49	21.09	6.74	91.7	49.9	32.7
2012-11-25 13:20:49	21.0345	6.75	91.7	49.9	32.7
2012-11-25 14:20:49	21.09	6.72	91.4	49.9	32.7
2012-11-25 15:20:49	21.1455	6.67	90.7	49.9	32.7
2012-11-25 16:20:49	21.09	6.62	90.1	49.9	32.7
2012-11-25 17:20:49	21.0345	6.63	90.1	49.9	32.7
2012-11-25 18:20:49	21.09	6.65	90.4	49.9	32.7
2012-11-25 19:20:49	21.09	6.65	90.4	49.9	32.7
2012-11-25 20:20:49	20.979	6.6	89.8	49.9	32.7
2012-11-25 21:20:49	21.09	6.6	89.8	49.9	32.7
2012-11-25 22:20:49	21.1455	6.57	89.5	49.8	32.7
2012-11-25 23:20:49	21.201	6.5	88.5	49.8	32.7
2012-11-26 00:20:49	21.0345	6.57	89.2	49.9	32.7
2012-11-26 01:20:49	21.1455	6.47	88.2	49.8	32.7
2012-11-26 02:20:49	21.0345	6.53	88.8	49.9	32.7
2012-11-26 03:20:49	21.09	6.51	88.5	49.9	32.7
2012-11-26 04:20:49	20.979	6.46	87.9	49.9	32.7
2012-11-26 05:20:49	21.201	6.43	87.6	49.8	32.7
2012-11-26 06:20:49	21.09	6.54	88.8	50	32.7
2012-11-26 07:20:49	21.1455	6.56	89.2	49.9	32.7
2012-11-26 08:20:49	21.09	6.57	89.2	49.9	32.7
2012-11-26 09:20:49	21.09	6.58	89.5	50	32.7
2012-11-26 10:20:49	21.09	6.53	88.8	49.9	32.8
2012-11-26 11:20:49	21.1455	6.46	87.9	50	32.8
2012-11-26 12:20:49	21.1455	6.41	87.2	49.8	32.7
2012-11-26 13:20:49	21.0345	6.47	87.9	50	32.8
2012-11-26 14:20:49	21.1455	6.24	85.3	50.9	33.4
2012-11-26 15:20:49	19.314	6.78	89.2	49.7	32.6
2012-11-26 16:20:49	19.425	6.92	91.1	49.7	32.6
2012-11-26 17:20:49	19.314	6.97	91.7	49.8	32.7
2012-11-26 18:20:49	19.536	6.94	91.4	49.8	31.9
2012-11-26 19:20:49	19.4805	6.91	90.7	49.7	31.9
2012-11-26 20:20:49	19.536	6.87	90.4	49.7	31.9
2012-11-26 21:20:49	19.536	6.96	91.4	49.7	32
2012-11-26 22:20:49	19.5915	7.02	92.3	49.8	32
2012-11-26 23:20:49	19.5915	6.91	91.1	49.7	32
2012-11-27 00:20:49	19.7025	6.89	90.7	49.8	32
2012-11-27 01:20:49	19.7025	6.83	90.1	49.7	32
2012-11-27 02:20:49	19.7025	6.91	91.1	49.7	32
2012-11-27 03:20:49	19.647	6.96	91.7	49.7	32
2012-11-27 04:20:49	19.8135	6.79	89.8	49.7	32
2012-11-27 05:20:49	19.758	6.82	90.1	49.6	32.1
2012-11-27 06:20:49	19.8135	6.71	88.8	49.6	32.1
2012-11-27 07:20:49	19.8135	6.74	89.2	49.7	32.1
2012-11-27 08:20:49	19.758	6.86	90.7	49.7	32.1
2012-11-27 09:20:49	19.869	6.78	89.8	49.6	32.1
2012-11-27 10:20:49	19.8135	6.89	91.1	49.7	32.1
2012-11-27 11:20:49	19.869	6.74	89.5	49.6	32.1
2012-11-27 12:20:49	19.98	6.76	89.8	49.8	32.2
2012-11-27 13:20:49	20.0355	6.77	89.8	49.8	32.2
2012-11-27 14:20:49	19.98	6.65	88.5	49.6	32.2
2012-11-27 15:20:49	20.0355	6.61	87.9	49.6	32.3
2012-11-27 16:20:49	20.1465	6.75	89.8	49.8	32.3
2012-11-27 17:20:49	20.0355	6.72	89.5	49.7	32.3
2012-11-27 18:20:49	20.091	6.64	88.5	49.7	32.3
2012-11-27 19:20:49	20.0355	6.66	88.8	49.7	32.3
2012-11-27 20:20:49	20.0355	6.68	88.8	49.8	32.3
2012-11-27 21:20:49	20.1465	6.59	87.9	49.6	32.3
2012-11-27 22:20:49	20.1465	6.63	88.5	49.6	32.3
2012-11-27 23:20:49	20.1465	6.63	88.5	49.6	32.3
2012-11-28 00:20:49	20.1465	6.62	88.2	49.5	32.2
2012-11-28 01:20:49	20.202	6.7	89.5	49.6	32.3
2012-11-28 02:20:49	20.2575	6.65	88.8	49.6	32.3
2012-11-28 03:20:49	20.2575	6.52	87.2	49.6	32.3
2012-11-28 04:20:49	20.2575	6.45	86.3	49.6	32.4
2012-11-28 05:20:49	20.2575	6.5	86.9	49.5	32.4
2012-11-28 06:20:49	20.2575	6.64	88.8	49.5	32.3
2012-11-28 07:20:49	20.202	6.52	87.2	49.5	32.4
2012-11-28 11:21:39	20.313	6.63	88.8	49.7	32.4
2012-11-28 12:21:39	20.3685	6.63	88.8	49.6	32.4
2012-11-28 13:21:39	20.313	6.66	89.2	49.7	32.4
2012-11-28 14:21:39	20.3685	6.6	88.5	49.6	32.4
2012-11-28 15:21:39	20.3685	6.6	88.5	49.8	32.6
2012-11-28 16:21:39	20.424	6.62	88.8	49.8	32.4
2012-11-28 17:21:39	20.424	6.55	87.9	49.7	32.5
2012-11-28 18:21:39	20.4795	6.57	87.9	49.6	31.7
2012-11-28 19:21:39	20.424	6.57	88.2	49.6	32.5
2012-11-28 20:21:39	20.3685	6.58	88.2	49.7	32.5
2012-11-28 21:21:39	20.3685	6.55	87.6	49.6	31.8
2012-11-28 22:21:39	20.424	6.53	87.6	49.5	32.5
2012-11-28 23:21:39	20.4795	6.49	86.9	49.6	31.8
2012-11-29 00:21:39	20.4795	6.44	86.3	49.5	31.8
2012-11-29 01:21:39	20.535	6.44	86.3	49.5	31.8
2012-11-29 02:21:39	20.424	6.45	86.6	49.6	32.5
2012-11-29 03:21:39	20.535	6.42	86	49.6	31.8
2012-11-29 04:21:39	20.535	6.49	86.9	49.5	31.8
2012-11-29 05:21:39	20.535	6.47	86.6	49.5	31.8
2012-11-29 06:21:39	20.4795	6.5	87.2	49.7	32.5
2012-11-29 07:21:39	20.535	6.36	85.3	49.5	31.9
2012-11-29 08:21:39	20.535	6.42	86	49.6	31.9
2012-11-29 09:21:39	20.535	6.4	85.7	49.5	31.8
2012-11-29 10:21:39	20.5905	6.39	85.7	49.6	31.9
2012-11-29 11:21:39	20.646	6.35	85.3	49.6	31.9
2012-11-29 12:21:39	20.5905	6.33	85.3	50.1	32.5
2012-11-29 13:21:39	20.535	6.35	85.3	50.1	32.4
2012-11-29 14:21:39	20.5905	6.29	84.7	50.1	32.5
2012-11-29 15:21:39	20.646	6.17	83.1	50	32.5
2012-11-29 16:21:39	20.5905	6.18	83.4	49.8	32.4
2012-11-29 17:21:39	20.7015	6.19	83.4	49.9	32.4
2012-11-29 18:21:39	20.646	6.09	82.2	49.8	32.4
2012-11-29 19:21:39	20.757	6.18	83.4	49.9	32.4
2012-11-29 20:21:39	20.7015	6.24	84.1	49.9	32.4
2012-11-29 21:21:39	20.757	6.15	83.1	49.8	32.4
2012-11-29 22:21:39	20.7015	6.24	84.1	49.8	32.4
2012-11-29 23:21:39	20.757	6.16	83.1	49.8	32.4
2012-11-30 00:21:39	20.7015	6.03	81.5	49.7	32.4
2012-11-30 01:21:39	20.868	6.23	84.1	50	32.5
2012-11-30 02:21:39	20.7015	6.18	83.4	49.9	32.5
2012-11-30 03:21:39	20.8125	6.11	82.5	49.9	32.5
2012-11-30 04:21:39	20.7015	6.12	82.8	49.8	32.5
2012-11-30 05:21:39	20.868	6.02	81.5	49.8	32.5
2012-11-30 06:21:39	20.757	6.09	82.2	49.8	32.5
2012-11-30 07:21:39	20.868	6.1	82.5	49.8	32.5
2012-11-30 08:21:39	20.757	6.2	83.7	49.8	32.5
2012-11-30 09:21:39	20.8125	6.19	83.7	49.9	32.5
2012-11-30 10:21:39	20.868	6.16	83.4	49.9	32.5
2012-11-30 11:21:39	20.9235	6.09	82.5	49.9	32.5
2012-11-30 12:21:39	20.868	6.1	82.5	49.8	32.5
2012-11-30 13:21:39	20.868	6.12	82.8	49.9	32.5
2012-11-30 14:21:39	20.868	6.19	83.7	49.9	32.5
2012-11-30 15:21:39	20.9235	6.16	83.4	49.9	32.5
2012-11-30 16:21:39	20.868	6.26	84.7	49.9	32.5
2012-11-30 17:21:39	20.979	6.17	83.7	49.9	32.6
2012-11-30 18:21:39	20.979	6.14	83.4	49.8	32.6
2012-11-30 19:21:39	20.979	6.17	83.7	49.9	32.6
2012-11-30 20:21:39	20.979	6.17	83.7	49.9	32.6
2012-11-30 21:21:39	20.9235	6.29	85.3	49.9	32.6
2012-11-30 22:21:39	21.0345	6.29	85.3	49.9	32.6
2012-11-30 23:21:39	20.979	6.1	82.8	49.8	32.6
2012-12-01 00:21:39	21.0345	6.05	82.2	49.8	32.6
2012-12-01 01:21:39	21.0345	6.14	83.4	49.8	32.6
2012-12-01 02:21:39	20.979	6.22	84.4	49.8	32.6
[truncated: 62 more rows]

## Sheet: Tank 3_NWL 6_1073
Date & Time	HTempData	DO (mg/L)	DO (%)	Cond (mS/cm)	Sal (ppt)	Comments
2012-04-13	18.6
2012-04-14	18.7
2012-04-15	18.7
2012-04-16	18.8
2012-04-17	19.7
2012-04-18	19.8
2012-04-19	19.8
2012-04-20	19.7
2012-04-21	19.7
2012-04-22	19.7
2012-04-23	19.7
2012-04-24	20.8
2012-04-25	20.7
2012-04-26	20.7
2012-04-27	22					*problem with chiller
2012-04-28	24.1
2012-04-29	25.1
2012-04-30	25.7
2012-05-01	21.8
2012-05-02	21.8
2012-05-03	21.7
2012-05-04	22.7					*problem with chiller
2012-05-05	24
2012-05-06	24.8
2012-05-07	25.5
2012-05-08	22.7
2012-05-09	22.7
2012-05-10	22.7
2012-05-11	22.2
2012-05-12	22.7
2012-05-13	22.8
2012-05-14	22.8
2012-05-15	23.6
2012-05-16 09:47:17	23.693	5.09	72.2	50.8	32.5
2012-05-16 11:47:17	23.693	5.26	74.7	50.8	32.5
2012-05-16 12:47:17	23.693	5.04	71.6	50.8	32.6
2012-05-16 13:47:17	23.8595	5.19	74.1	50.8	32.7
2012-05-16 14:47:17	23.8595	5.09	72.6	50.8	32.7
2012-05-16 15:47:17	23.915	4.85	69.2	50.9	32.7
2012-05-16 16:47:17	23.915	4.91	70.1	51	32.7
2012-05-16 17:47:17	23.8595	4.97	70.9	51	32.7
2012-05-16 18:47:17	23.915	4.9	69.9	51	32.7
2012-05-16 19:47:17	23.693	4.81	68.4	50.8	32.6
2012-05-16 20:47:17	23.6375	4.83	68.6	50.8	32.5
2012-05-16 21:47:17	23.6375	4.78	67.9	50.8	32.5
2012-05-16 22:47:17	23.693	5.04	71.6	50.8	32.5
2012-05-16 23:47:17	23.6375	5.01	71.1	50.8	32.5
2012-05-17 00:47:17	23.6375	5.01	71.1	50.7	32.5
2012-05-17 01:47:17	23.6375	4.97	70.5	50.8	32.5
2012-05-17 02:47:17	23.693	4.92	69.9	50.8	32.5
2012-05-17 03:47:17	23.693	5.02	71.4	50.7	32.5
2012-05-17 04:47:17	23.693	5.07	72	50.7	32.5
2012-05-17 05:47:17	23.693	5	71.1	50.8	32.5
2012-05-17 06:47:17	23.582	5.09	72.2	50.8	32.5
2012-05-17 07:47:17	23.6375	5.21	73.9	50.8	32.5
2012-05-17 08:47:17	23.693	5.2	73.9	50.8	32.5
2012-05-17 09:47:17	23.693	5.26	74.7	50.7	32.5
2012-05-17 10:47:17	23.582	5.27	74.8	50.8	32.5
2012-05-17 11:47:17	23.6375	5.09	72.2	50.8	32.5
2012-05-17 13:47:17	23.6375	5.34	75.8	50.8	32.5
2012-05-17 14:47:17	23.582	5.24	74.3	50.8	32.5
2012-05-17 15:47:17	23.582	5.11	72.4	50.8	32.5
2012-05-17 16:47:17	23.582	5.08	72	50.8	32.5
2012-05-17 17:47:17	23.6375	5.26	74.7	50.7	32.5
2012-05-17 18:47:17	23.7485	5.35	76	50.8	32.5
2012-05-17 19:47:17	23.693	5.3	75.2	50.8	32.5
2012-05-17 20:47:17	23.7485	5.05	71.8	50.7	32.5
2012-05-17 21:47:17	23.6375	5.26	74.8	50.7	32.5
2012-05-17 22:47:17	23.6375	5.28	75	50.7	32.5
2012-05-17 23:47:17	23.693	5.07	72	50.8	32.5
2012-05-18 00:47:17	23.693	5.16	73.3	50.7	32.5
2012-05-18 01:47:17	23.6375	5.25	74.5	50.8	32.5
2012-05-18 02:47:17	23.6375	5.31	75.4	50.8	32.5
2012-05-18 03:47:17	23.693	5.19	73.7	50.8	32.5
2012-05-18 04:47:17	23.693	5.14	73	50.8	32.5
2012-05-18 05:47:17	23.693	5.14	73	50.8	32.5
2012-05-18 06:47:17	23.6375	5.25	74.5	50.8	32.5
2012-05-18 07:47:17	23.6375	5.34	75.8	50.8	32.5
2012-05-18 08:47:17	23.693	5.25	74.7	50.7	32.5
2012-05-18 09:47:17	23.6375	5.31	75.4	50.8	32.5
2012-05-18 10:47:17	23.6375	5.4	76.6	50.8	32.5
2012-05-18 11:47:17	23.582	5.27	74.8	50.8	32.5
2012-05-18 12:47:17	23.5265	5.25	74.5	50.8	32.5
2012-05-18 13:47:17	23.6375	5.43	77.1	50.9	32.5
2012-05-18 14:47:17	23.582	5.42	76.9	50.8	32.5
2012-05-18 15:47:17	23.582	5.18	73.5	50.7	32.5
2012-05-18 16:47:17	23.582	5.39	76.4	50.7	32.5
2012-05-18 17:47:17	23.5265	5.29	75	50.7	32.5
2012-05-18 18:47:17	23.471	5.33	75.8	50.9	33.3
2012-05-18 19:47:17	23.5265	5.23	74.1	50.8	32.5
2012-05-18 20:47:17	23.5265	5.17	73.3	50.8	32.5
2012-05-18 21:47:17	23.582	5.25	74.5	50.7	32.5
2012-05-18 22:47:17	23.5265	5.43	76.9	50.7	32.5
2012-05-18 23:47:17	23.471	5.08	72.2	50.8	33.2
2012-05-19 01:47:17	23.5265	5.41	76.7	50.8	32.5
2012-05-19 02:47:17	23.5265	5.34	75.6	50.8	32.5
2012-05-19 03:47:17	23.5265	5.28	74.8	50.8	32.5
2012-05-19 04:47:17	23.5265	5.32	75.4	50.8	32.5
2012-05-19 05:47:17	23.471	5.29	75.2	50.9	33.2
2012-05-19 06:47:17	23.5265	5.41	76.6	50.8	32.5
2012-05-19 07:47:17	23.5265	5.29	75	50.9	32.5
2012-05-19 08:47:17	23.5265	5.41	76.7	50.8	32.5
2012-05-19 09:47:17	23.5265	5.58	79	50.8	32.5
2012-05-19 10:47:17	23.471	5.44	77.3	50.9	33.2
2012-05-19 11:47:17	23.5265	5.41	76.7	50.8	32.5
2012-05-19 12:47:17	23.5265	5.32	75.4	50.8	32.5
2012-05-19 13:47:17	23.4155	5.26	74.7	50.9	33.2
2012-05-19 14:47:17	23.471	5.31	75.2	50.8	33.2
2012-05-19 15:47:17	23.5265	5.36	76	50.8	32.5
2012-05-19 16:47:17	23.5265	5.4	76.7	50.9	33.2
2012-05-19 17:47:17	23.5265	5.36	76	50.8	32.5
2012-05-19 18:47:17	23.5265	5.36	76	50.9	32.5
2012-05-19 19:47:17	23.582	5.15	73.1	50.9	32.5
2012-05-19 20:47:17	23.5265	5.38	76.2	50.8	32.5
2012-05-19 21:47:17	23.5265	5.53	78.3	50.8	32.5
2012-05-19 22:47:17	23.5265	5.41	76.6	50.8	32.5
2012-05-19 23:47:17	23.5265	5.34	75.6	50.8	32.5
2012-05-20 00:47:17	23.582	5.32	75.4	50.9	32.5
2012-05-20 01:47:17	23.5265	5.27	74.7	50.8	32.5
2012-05-20 02:47:17	23.5265	5.39	76.4	50.8	32.5
2012-05-20 03:47:17	23.5265	5.35	75.8	50.8	32.5
2012-05-20 04:47:17	23.582	5.23	74.1	50.9	32.5
2012-05-20 05:47:17	23.471	5.2	73.7	50.8	32.5
2012-05-20 06:47:17	23.5265	5.32	75.4	50.9	32.5
2012-05-20 07:47:17	23.5265	5.31	75.2	50.7	32.5
2012-05-20 08:47:17	23.5265	5.28	74.8	50.9	32.5
2012-05-20 09:47:17	23.5265	5.39	76.4	50.8	32.5
2012-05-20 10:47:17	23.8595	5.19	74.1	51	32.7
2012-05-20 11:47:17	24.1925	5.33	76.7	50.9	33.3
2012-05-20 12:47:17	24.5255	5.4	77.9	50.9	32.6
2012-05-20 13:47:17	24.5255	5.16	74.5	50.9	32.6
2012-05-20 14:47:17	24.5255	5.18	74.7	50.9	32.6
2012-05-20 15:47:17	24.5255	5.3	76.6	50.9	32.6
2012-05-20 16:47:17	24.5255	5.17	74.5	50.9	32.6
2012-05-20 17:47:17	24.47	4.96	71.8	51	33.3
2012-05-20 18:47:17	24.47	5.1	73.7	51	33.3
2012-05-20 20:47:17	24.47	5.05	73	51	33.3
2012-05-20 21:47:17	24.47	5.15	74.5	51	33.3
2012-05-20 22:47:17	24.47	5.14	74.3	51	33.3
2012-05-20 23:47:17	24.47	5.02	72.6	51	33.3
2012-05-21 00:47:17	24.47	5.03	72.8	51	33.3
2012-05-21 01:47:17	24.47	4.93	71.3	51	33.3
2012-05-21 02:47:17	24.47	4.98	72	51	33.3
2012-05-21 03:47:17	24.47	5.02	72.6	51	33.3
2012-05-21 04:47:17	24.47	5.01	72.4	51	33.3
2012-05-21 05:47:17	24.4145	4.9	70.9	51	33.3
2012-05-21 06:47:17	24.4145	4.9	70.9	50.9	33.3
2012-05-21 07:47:17	24.4145	4.96	71.8	50.9	33.3
2012-05-21 08:47:17	24.4145	5.2	75.2	50.9	33.3
2012-05-21 09:47:17	24.4145	5.06	73.1	50.9	33.3
2012-05-21 10:47:17	24.4145	5.26	76	51	33.3
2012-05-21 11:47:17	24.4145	5.07	73.3	51	33.3
2012-05-21 12:47:17	24.4145	5.29	76.4	50.9	33.3
2012-05-21 13:47:17	24.4145	5.06	73	50.9	33.3
2012-05-21 14:47:17	24.359	5.09	73.5	51	33.3
2012-05-21 16:47:17	24.4145	4.96	71.6	50.9	33.3
2012-05-21 17:47:17	24.359	5.04	72.8	51	33.3
2012-05-21 18:47:17	24.359	5.06	73.1	51	33.3
2012-05-21 19:47:17	24.4145	5.02	72.6	50.9	33.3
2012-05-21 20:47:17	24.4145	5.06	73.1	51	33.3
2012-05-21 23:47:17	24.4145	4.94	71.4	51	33.3
2012-05-22 00:47:17	24.4145	5.09	73.5	51	33.3
2012-05-22 01:47:17	24.47	5.14	74.3	51	33.3
2012-05-22 02:47:17	24.4145	5.19	75	51	33.3
2012-05-22 03:47:17	24.4145	4.92	71.1	50.9	33.3
2012-05-23	24.3
2012-05-24	24.3
2012-05-25	24.4
2012-05-26	24.4
2012-05-27	24.6
2012-05-28	24.6
2012-05-29	25.2
2012-05-30	25.3
2012-05-31	25.2
2012-06-01	25.2
2012-06-02	25.3
2012-06-03	25.3
2012-06-04	25.5
2012-06-05	26.2
2012-06-06	26.4
2012-06-07	26.3
2012-06-08	26.2
2012-06-09	26.3
2012-06-10	26.4
2012-06-11	26.2
2012-06-12	26.6
2012-06-13	26.9
2012-06-14	26.9
2012-06-15
2012-06-16	26.8
2012-06-17	26.7
2012-06-18	26.7
2012-06-19	27.4
2012-06-20	27.1
2012-06-21	27.2
2012-06-22	27.1
2012-06-23	27.4
2012-06-24	27.2
2012-06-25	27.4					Increased temp to induce spawn
2012-06-26	27.9
2012-06-27	27.8
2012-06-28	27.7
2012-06-29	27.7
2012-06-30
2012-07-01	27.7
2012-07-02	27.8
2012-07-03	27.7
2012-07-04	28.1
2012-07-05	27.6					Decreased
2012-07-06	25.2
2012-07-07	25.2
2012-07-08	25.3
2012-07-09	25.4					Increased
2012-07-10	27.8
2012-07-11	27.7					Decreased
2012-07-12	26.8
2012-07-13	26.7
2012-07-14	26.3
2012-07-15	26
2012-07-16	25.4					Increased
2012-07-17	27.9
2012-07-18	27.8
2012-07-19	28
2012-07-20	27.8
2012-07-21	27.7
2012-07-22	27.8
2012-07-23	27.9
2012-07-24	27.9
2012-07-25 09:56:05	27.75	4.96	75.6	49.8	32.7
2012-07-25 10:56:05	27.75	5.05	77	49.8	32.7
2012-07-25 11:56:05	27.75	4.71	71.8	49.9	32.7
2012-07-25 12:56:05	27.639	4.64	70.7	49.9	32.7
2012-07-25 13:56:05	27.6945	4.53	69.1	49.8	32.7
2012-07-25 14:56:05	27.639	4.51	68.6	50	32.8
2012-07-25 15:56:05	27.639	4.41	67.2	50	32.7
2012-07-25 16:56:05	27.75	4.57	69.7	49.9	32.8
2012-07-25 17:56:05	27.75	4.5	68.6	49.8	32.7
2012-07-25 18:56:05	27.75	4.58	69.9	49.8	32.7
2012-07-25 19:56:05	27.75	4.55	69.4	49.8	32.7
2012-07-25 20:56:05	27.6945	4.63	70.5	50	32.7
2012-07-25 21:56:05	27.75	4.52	69.1	49.9	32.8
2012-07-25 22:56:05	27.861	4.49	68.6	49.8	32.7
2012-07-25 23:56:05	27.639	4.55	69.4	49.9	32.7
2012-07-26 00:56:05	27.8055	4.56	69.7	49.8	32.7
2012-07-26 01:56:05	27.75	4.78	72.9	49.8	32.7
2012-07-26 02:56:05	27.8055	4.65	71	49.8	32.7
2012-07-26 03:56:05	27.75	4.76	72.6	49.8	32.8
2012-07-26 04:56:05	27.75	4.6	70.2	49.8	32.7
2012-07-26 05:56:05	27.75	4.53	69.1	49.8	32.7
2012-07-26 06:56:05	27.75	4.48	68.3	49.8	32.7
2012-07-26 07:56:05	27.861	4.67	71.3	49.8	32.7
2012-07-26 08:56:05	27.75	4.87	74.3	49.8	32.7
2012-07-26 09:56:05	27.8055	4.7	71.8	49.7	32.7
2012-07-26 10:56:05	27.75	4.83	73.7	49.8	32.7
2012-07-26 11:56:05	27.75	4.78	72.9	49.8	32.7
2012-07-26 12:56:05	27.75	4.8	73.4	49.7	32.7
2012-07-26 13:56:05	27.75	4.5	68.6	49.8	32.7
2012-07-26 14:56:05	27.8055	4.35	66.4	49.9	32.7
2012-07-26 15:56:05	27.75	4.53	69.1	49.9	32.7
2012-07-26 16:56:05	27.75	4.5	68.6	49.9	32.7
2012-07-26 17:56:05	27.75	4.51	68.8	50	32.8
2012-07-26 18:56:05	27.861	4.56	69.7	49.8	32.8
2012-07-26 19:56:05	27.8055	4.5	68.8	49.9	32.8
2012-07-26 20:56:05	27.861	4.52	69.1	49.9	32.9
2012-07-26 21:56:05	27.8055	4.57	69.9	49.8	32.9
2012-07-26 22:56:05	27.861	4.48	68.6	49.8	32.9
2012-07-26 23:56:05	27.8055	4.72	72.1	49.8	32.8
2012-07-27 00:56:05	27.8055	4.85	74	49.9	32.8
2012-07-27 01:56:05	27.8055	4.67	71.3	49.9	32.8
2012-07-27 02:56:05	27.75	4.77	72.9	49.8	32.8
2012-07-27 03:56:05	27.9165	4.66	71.3	49.8	32.8
2012-07-27 04:56:05	27.8055	4.56	69.7	49.8	32.8
2012-07-27 05:56:05	27.9165	4.76	72.9	49.9	32.8
2012-07-27 06:56:05	27.8055	4.8	73.4	49.8	32.9
2012-07-27 07:56:05	27.861	4.79	73.2	49.8	32.7
2012-07-27 08:56:05	27.75	4.78	72.9	50	32.8
2012-07-27 09:56:05	27.8055	4.93	75.3	49.9	32.7
2012-07-27 10:56:05	27.75	5.12	78.1	49.9	32.8
2012-07-27 11:56:05	27.8055	4.74	72.4	49.9	32.8
2012-07-27 12:56:05	27.8055	4.55	69.4	49.9	32.8
2012-07-27 13:56:05	27.8055	4.84	74	49.8	32.8
2012-07-27 14:56:05	27.75	4.93	75.3	49.9	32.8
2012-07-27 15:56:05	27.8055	4.84	74	49.9	32.8
2012-07-27 16:56:05	27.75	4.88	74.5	50	32.8
2012-07-27 17:56:05	27.861	4.87	74.5	50	32.8
2012-07-27 18:56:05	27.8055	4.82	73.7	49.8	32.8
2012-07-27 19:56:05	27.75	4.9	74.8	49.9	32.7
2012-07-27 20:56:05	27.861	5.07	77.5	49.8	32.8
2012-07-27 21:56:05	27.861	4.82	73.7	49.8	32.8
2012-07-27 22:56:05	27.861	4.8	73.4	49.8	32.8
2012-07-27 23:56:05	27.972	4.83	74	49.8	32.8
2012-07-28 00:56:05	27.861	4.81	73.7	49.9	32.8
2012-07-28 01:56:05	27.861	4.89	74.8	49.9	32.9
2012-07-28 02:56:05	27.75	4.69	71.5	49.9	32.9
2012-07-28 03:56:05	27.8055	4.68	71.5	49.8	32.7
2012-07-28 04:56:05	27.861	4.79	73.2	50	32.8
2012-07-28 05:56:05	27.861	4.95	75.6	49.9	32.9
2012-07-28 06:56:05	27.8055	4.77	72.9	49.7	32.8
2012-07-28 07:56:05	27.8055	4.99	76.2	49.9	32.8
2012-07-28 08:56:05	27.8055	4.82	73.7	49.8	32.8
2012-07-28 09:56:05	27.75	4.81	73.4	49.9	32.7
2012-07-28 10:56:05	27.75	4.92	75.1	50	32.8
2012-07-28 11:56:05	27.8055	4.99	76.2	49.8	32.7
2012-07-28 12:56:05	27.861	4.77	72.9	49.9	32.8
2012-07-28 13:56:05	27.6945	5.03	76.7	50	32.8
2012-07-28 14:56:05	27.8055	5.02	76.7	49.8	32.8
2012-07-28 15:56:05	27.75	4.99	76.2	49.9	32.7
2012-07-28 16:56:05	27.6945	4.83	73.7	50	32.8
2012-07-28 17:56:05	27.8055	4.99	76.2	50	32.7
2012-07-28 18:56:05	27.75	4.87	74.3	50	32.8
2012-07-28 19:56:05	27.8055	5.18	79.1	50	32.8
2012-07-28 20:56:05	27.8055	5.14	78.6	49.8	32.7
2012-07-28 21:56:05	27.8055	5	76.4	49.8	32.7
2012-07-28 22:56:05	27.8055	4.97	75.9	49.8	32.8
2012-07-28 23:56:05	27.8055	4.95	75.6	49.9	32.8
2012-07-29 00:56:05	27.861	5.05	77	49.8	32.7
2012-07-29 01:56:05	27.8055	5.07	77.5	49.8	32.8
2012-07-29 02:56:05	27.75	5	76.2	49.9	32.7
2012-07-29 03:56:05	27.75	5.18	79.1	49.9	32.7
2012-07-29 04:56:05	27.75	5.12	78.1	49.8	32.7
2012-07-29 05:56:05	27.75	5.06	77.2	49.8	32.7
2012-07-29 06:56:05	27.75	4.9	74.8	49.9	32.8
2012-07-29 07:56:05	27.639	5.18	78.9	49.9	32.7
2012-07-29 08:56:05	27.6945	5.11	77.8	49.9	32.7
2012-07-29 09:56:05	27.6945	4.78	72.9	50	32.7
2012-07-29 10:56:05	27.639	4.86	74	49.9	32.7
2012-07-29 11:56:05	27.6945	5.14	78.3	50	32.7
2012-07-29 12:56:05	27.6945	4.98	75.9	49.9	32.7
2012-07-29 13:56:05	27.6945	5.01	76.4	49.8	32.7
2012-07-29 14:56:05	27.6945	4.8	73.2	49.9	32.7
2012-07-29 15:56:05	27.75	4.78	72.9	49.9	32.7
2012-07-29 16:56:05	27.528	4.94	75.1	49.9	32.7
2012-07-29 17:56:05	27.639	4.76	72.4	49.9	32.7
2012-07-29 18:56:05	27.9165	4.41	67.5	49.8	32.9
2012-07-29 19:56:05	27.861	4.61	70.5	49.8	32.8
2012-07-29 20:56:05	27.861	4.74	72.4	49.9	32.8
2012-07-29 21:56:05	27.75	4.5	68.8	50	32.8
2012-07-29 22:56:05	27.8055	4.57	69.7	49.8	32.7
2012-07-29 23:56:05	27.75	4.53	69.1	49.8	32.7
2012-07-30 00:56:05	27.639	4.69	71.5	49.8	32.6
2012-07-30 01:56:05	27.6945	4.63	70.5	49.9	32.7
2012-07-30 02:56:05	27.8055	4.56	69.7	49.8	32.8
2012-07-30 03:56:05	27.9165	4.74	72.4	49.9	32.9
2012-07-30 04:56:05	27.8055	4.47	68.3	49.9	32.7
2012-07-30 05:56:05	27.75	4.8	73.2	49.7	32.8
2012-07-30 06:56:05	27.6945	4.61	70.2	49.7	32.7
2012-07-30 07:56:05	27.6945	4.84	73.7	49.8	32.7
2012-07-30 08:56:05	27.75	4.83	73.7	49.9	32.7
2012-07-30 09:56:05	27.861	4.74	72.4	49.9	32.7
2012-07-30 10:56:05	27.8055	4.8	73.4	49.9	32.7
2012-07-30 11:56:05	27.6945	4.75	72.4	49.8	32.7
2012-07-30 12:56:05	27.861	4.16	63.7	49.8	32.9
2012-07-30 13:56:05	27.8055	4.59	70.2	49.9	32.9
2012-07-30 14:56:05	27.75	4.67	71.3	49.9	32.8
2012-07-30 15:56:05	27.75	4.81	73.4	50	32.8
2012-07-30 16:56:05	27.6945	4.73	72.1	50	32.8
2012-07-30 17:56:05	27.6945	4.89	74.5	49.9	32.8
2012-07-30 18:56:05	27.6945	4.8	73.2	49.9	32.7
2012-07-30 19:56:05	27.639	4.68	71.3	49.9	32.7
2012-07-30 20:56:05	27.6945	4.86	74	49.9	32.8
2012-07-30 21:56:05	27.861	4.82	73.7	50	32.9
2012-07-30 22:56:05	27.9165	4.79	73.4	50	32.9
2012-07-30 23:56:05	27.75	4.72	72.1	49.9	32.9
2012-07-31 00:56:05	27.75	4.9	74.8	49.9	32.9
2012-07-31 01:56:05	27.75	4.97	75.9	50	32.9
2012-07-31 02:56:05	27.6945	5.07	77.2	49.9	32.7
2012-07-31 03:56:05	27.639	4.76	72.4	49.9	32.7
2012-07-31 04:56:05	27.639	4.84	73.7	49.9	32.7
2012-07-31 05:56:05	27.861	4.99	76.4	50	32.8
2012-07-31 06:56:05	27.9165	4.97	75.9	49.9	32.8
2012-07-31 07:56:05	27.8055	4.98	76.2	50.1	32.9
2012-07-31 08:56:05	27.6945	5	76.2	49.9	32.8
2012-07-31 09:56:05	27.75	4.9	74.8	49.8	32.8
2012-07-31 10:56:05	27.639	4.91	74.8	50.1	32.8
2012-07-31 11:56:05	27.6945	4.99	76.2	49.9	32.8
2012-07-31 12:56:05	27.75	4.77	72.9	49.9	32.9
2012-07-31 13:56:05	27.75	4.7	71.8	50.1	32.9
2012-07-31 14:56:05	27.8055	4.67	71.3	50	32.9
2012-07-31 15:56:05	27.8055	4.74	72.4	50	32.9
2012-07-31 16:56:05	27.8055	4.75	72.6	50	33
2012-07-31 17:56:05	27.8055	4.74	72.4	50	32.9
2012-07-31 18:56:05	27.8055	4.59	70.2	50.1	32.9
2012-07-31 19:56:05	27.8055	4.74	72.4	50.1	32.9
2012-07-31 20:56:05	27.861	4.54	69.4	50	32.9
2012-07-31 21:56:05	27.861	4.64	71	49.9	32.9
2012-07-31 22:56:05	27.8055	4.87	74.5	50	32.8
2012-07-31 23:56:05	27.861	4.8	73.4	49.8	32.9
2012-08-01 00:56:05	27.8055	4.75	72.6	50	32.9
2012-08-01 01:56:05	27.8055	4.74	72.4	49.9	32.9
2012-08-01 02:56:05	27.8055	4.8	73.4	50	32.9
2012-08-01 03:56:05	27.75	4.77	72.9	50	32.9
2012-08-01 04:56:05	27.75	4.7	71.8	50	32.9
2012-08-01 05:56:05	27.75	4.87	74.5	50	32.9
2012-08-01 06:56:06	27.8055	4.68	71.5	50	32.8
2012-08-01 07:56:05	27.8055	5.02	76.7	50	32.9
2012-08-01 09:56:58	27.75	5	76.4	50	32.9
2012-08-01 10:56:58	27.75	5.06	77.2	50	32.9
2012-08-01 11:56:58	27.2505	5.2	78.9	50	33.3
2012-08-01 12:56:58	26.9175	4.78	72.1	50.1	33.1
2012-08-01 13:56:58	26.5845	5.06	75.6	50.1	32.5
2012-08-01 14:56:58	26.085	5.09	75.6	49.9	32.9
2012-08-01 15:56:58	25.641	5.03	74	50.1	32.6
2012-08-01 16:56:58	25.2525	4.84	71	50	33.1
2012-08-01 17:56:58	24.975	5.28	77	49.9	32.9
2012-08-01 18:56:58	25.0305	5.09	74.3	49.9	32.9
2012-08-01 19:56:58	25.1415	5.35	78.3	49.9	32.9
2012-08-01 20:56:58	25.086	5.22	76.2	50	32.9
2012-08-01 21:56:58	24.975	5.16	75.3	49.9	32.9
2012-08-01 22:56:58	25.1415	5.25	76.7	49.8	32.9
2012-08-01 23:56:58	25.1415	5.17	75.6	49.9	32.9
2012-08-02 00:56:58	25.0305	5.13	74.8	49.8	32.9
2012-08-02 01:56:58	25.086	5.41	79.1	49.9	32.9
2012-08-02 02:56:58	25.086	5.23	76.4	49.9	32.9
2012-08-02 03:56:58	25.086	5.15	75.3	49.9	32.9
2012-08-02 04:56:58	25.0305	5.41	78.9	50	32.9
2012-08-02 05:56:58	25.086	5.3	77.5	49.9	32.9
2012-08-02 06:56:58	25.086	5.51	80.5	49.9	32.9
2012-08-02 07:56:58	25.086	5.41	79.1	49.9	32.9
2012-08-02 08:56:58	25.0305	5.46	79.7	49.9	32.9
2012-08-02 09:56:58	25.086	5.43	79.4	49.9	32.9
2012-08-02 10:56:58	25.086	5.43	79.4	49.9	32.9
2012-08-02 11:56:58	25.1415	5.45	79.7	49.9	32.9
2012-08-02 12:56:58	25.0305	5.54	80.8	49.9	32.9
2012-08-02 13:56:58	25.086	5.23	76.4	50	32.9
2012-08-02 14:56:58	25.086	4.97	72.6	49.9	32.9
2012-08-02 15:56:58	24.975	5.21	75.9	50.1	32.9
2012-08-02 16:56:58	25.086	5.4	78.9	49.9	32.9
2012-08-02 17:56:58	25.086	5.12	74.8	49.9	32.9
2012-08-02 18:56:58	25.0305	5.23	76.4	49.9	32.9
2012-08-02 19:56:58	25.086	5.23	76.4	50	32.9
2012-08-02 20:56:58	25.1415	5.4	78.9	50	32.9
2012-08-02 21:56:58	25.086	5.38	78.6	50	32.9
2012-08-02 22:56:58	25.1415	5.19	75.9	49.9	32.9
2012-08-02 23:56:58	25.086	5.09	74.3	50	32.9
2012-08-03 00:56:58	25.086	5.38	78.6	50	32.9
2012-08-03 01:56:58	25.1415	5.38	78.6	50	32.9
2012-08-03 02:56:58	25.086	5.04	73.7	49.9	32.9
2012-08-03 03:56:58	25.1415	5.67	82.9	50	32.9
2012-08-03 04:56:58	25.1415	5.15	75.3	49.9	32.9
2012-08-03 05:56:58	25.1415	5.45	79.7	50	32.9
2012-08-03 06:56:58	25.1415	5.47	80	50	32.9
2012-08-03 07:56:58	25.0305	5.31	77.5	49.9	32.9
2012-08-03 08:56:58	25.1415	5.47	80	50	32.9
2012-08-03 09:56:58	25.086	5.4	78.9	50	32.9
2012-08-03 10:56:58	25.1415	5.51	80.5	50	32.9
2012-08-03 11:56:58	25.1415	5.41	79.1	50	32.9
2012-08-03 12:56:58	25.1415	5.56	81.3	49.9	32.9
2012-08-03 13:56:58	25.1415	5.56	81.3	50	32.9
2012-08-03 14:56:58	25.086	5.38	78.6	50	32.9
2012-08-03 15:56:58	25.1415	5.52	80.8	50	33
2012-08-03 16:56:58	25.197	5.46	80	50	33
2012-08-03 17:56:58	25.2525	5.4	79.1	50	33
2012-08-03 18:56:58	25.086	5.35	78.3	50.1	33
2012-08-03 19:56:58	25.2525	5.51	80.8	50.1	33.1
2012-08-03 20:56:58	25.308	5.65	82.9	50.2	33.1
2012-08-03 21:56:58	25.1415	5.4	79.1	50	33.1
2012-08-03 22:56:58	25.197	5.33	78.1	50	33.1
2012-08-03 23:56:58	25.2525	5.41	79.4	50.1	33.1
2012-08-04 00:56:58	25.197	5.4	79.1	50	33.1
2012-08-04 01:56:58	25.308	5.45	80	50	33.1
2012-08-04 02:56:58	25.2525	5.51	80.8	50	33.1
2012-08-04 03:56:58	25.197	5.29	77.5	50.1	33.1
2012-08-04 04:56:58	25.2525	5.51	80.8	50	33.1
2012-08-04 05:56:58	25.197	5.42	79.4	50	33.1
2012-08-04 06:56:58	25.197	5.38	78.9	50.1	33.1
2012-08-04 07:56:58	25.197	5.62	82.4	50	33.1
2012-08-04 08:56:58	25.308	5.06	74.3	50.1	33.1
2012-08-04 09:56:58	25.2525	5.26	77.2	50.1	33.1
2012-08-04 10:56:58	25.197	5.36	78.6	50	33.1
2012-08-04 11:56:58	25.3635	5.32	78.1	50.1	33.1
2012-08-04 12:56:58	25.2525	5.39	79.1	50.1	33.1
2012-08-04 13:56:58	25.308	5.59	82.1	50.1	33.1
2012-08-04 14:56:58	25.3635	5.19	76.2	50	33.1
2012-08-04 15:56:58	25.0305	5.54	80.8	50	32.9
2012-08-04 16:56:58	25.086	5.53	80.8	50	32.9
2012-08-04 17:56:58	25.0305	5.6	81.8	50	32.9
2012-08-04 18:56:58	25.1415	5.45	79.7	50	32.9
2012-08-04 19:56:58	25.086	5.43	79.4	50	32.9
2012-08-04 20:56:58	25.1415	5.51	80.5	50	32.9
2012-08-04 21:56:58	25.197	5.4	79.1	50.1	33
2012-08-04 22:56:58	25.1415	5.45	79.7	49.9	32.9
2012-08-04 23:56:58	25.1415	5.53	80.8	49.9	32.9
2012-08-05 00:56:58	25.1415	5.56	81.3	49.9	32.9
2012-08-05 01:56:58	25.086	5.59	81.6	49.9	32.9
2012-08-05 02:56:58	25.1415	5.59	81.8	49.9	32.9
2012-08-05 03:56:58	25.086	5.59	81.6	50	32.9
2012-08-05 04:56:58	25.086	5.48	80	50	32.9
2012-08-05 05:56:58	25.086	5.33	77.8	50	32.9
2012-08-05 06:56:58	25.1415	5.79	84.6	50	32.9
2012-08-05 07:56:58	25.086	5.49	80.2	50	32.9
2012-08-05 08:56:58	25.086	5.38	78.6	50	32.9
2012-08-05 09:56:58	25.1415	5.61	82.1	50	32.9
2012-08-05 10:56:58	25.308	5.33	78.3	50.1	33.1
2012-08-05 11:56:58	25.641	5.62	82.7	50.1	32.7
2012-08-05 12:56:58	25.9185	5.33	78.9	50.1	32.9
2012-08-05 13:56:58	26.196	5.49	81.8	50.1	33.1
2012-08-05 14:56:58	26.4735	5.3	79.1	50.2	32.6
2012-08-05 15:56:58	26.751	5.68	85.4	50.2	33.1
2012-08-05 16:56:58	27.0285	5.27	79.7	50.1	33.2
2012-08-05 17:56:58	27.2505	5.28	80.2	50.1	33.3
2012-08-05 18:56:58	27.4725	5.14	78.1	50.2	32.8
2012-08-05 19:56:58	27.75	5.02	76.7	50.1	32.9
2012-08-05 20:56:58	27.972	4.97	76.2	50.1	33
2012-08-05 21:56:58	27.9165	5.13	78.6	50.1	33
2012-08-05 22:56:58	27.861	5.03	77	50.1	33
2012-08-05 23:56:58	27.861	4.92	75.3	50.1	33
2012-08-06 00:56:58	27.8055	4.77	72.9	50.1	32.9
2012-08-06 01:56:58	27.75	4.88	74.5	50.1	32.9
2012-08-06 02:56:58	27.6945	5.1	77.8	50.2	32.9
2012-08-06 03:56:58	27.639	5.31	81	50.1	32.9
2012-08-06 04:56:58	27.639	4.94	75.3	50.1	32.9
2012-08-06 05:56:58	27.5835	4.93	75.1	50.1	32.9
2012-08-06 06:56:58	27.528	4.97	75.6	50.1	32.8
2012-08-06 07:56:58	27.639	4.91	74.8	50.2	32.8
2012-08-06 08:56:58	27.861	4.94	75.6	50.2	33
2012-08-06 09:56:58	27.9165	5.23	80.2	50.2	33
2012-08-06 10:56:58	27.75	5.61	85.6	50.1	32.9
2012-08-06 11:56:58	27.528	5.37	81.6	50.1	32.7
2012-08-06 12:56:58	26.9175	3.55	53.4	49.2	31.2
2012-08-08 09:57:52	27.639	5.18	78.9	50.1	32.8
2012-08-08 10:57:52	27.639	5.03	76.7	50	32.8
2012-08-08 11:57:52	27.639	5	76.2	50	32.8
2012-08-08 12:57:52	27.861	5.04	77	50.1	32.9
2012-08-08 13:57:52	27.861	4.96	75.9	50	32.9
2012-08-08 14:57:52	27.8055	5.05	77.2	50	32.9
2012-08-08 15:57:52	27.75	5.04	77	50	32.9
2012-08-08 16:57:52	27.6945	5.19	79.1	50.1	32.9
2012-08-08 17:57:52	27.6945	5.13	78.3	50.1	32.8
2012-08-08 18:57:52	27.6945	5.1	77.8	50	32.8
2012-08-08 19:57:52	27.5835	5.07	77.2	50	32.8
2012-08-08 20:57:52	27.6945	5.11	77.8	50	32.8
2012-08-08 21:57:52	27.75	5.13	78.3	50.1	32.9
2012-08-08 22:57:52	27.861	4.99	76.4	50.1	32.9
2012-08-08 23:57:52	27.8055	5.07	77.5	50	32.9
2012-08-09 00:57:52	27.861	4.95	75.6	50.1	32.9
2012-08-09 01:57:52	27.639	5.19	79.1	50.1	32.9
2012-08-09 02:57:52	27.6945	5.01	76.4	50	32.8
2012-08-09 03:57:52	27.639	5.09	77.5	50	32.8
2012-08-09 04:57:52	27.861	5.06	77.2	50.1	32.9
2012-08-09 05:57:52	27.75	4.81	73.4	50.1	32.9
2012-08-09 06:57:52	27.861	5.05	77.2	50.1	32.9
2012-08-09 07:57:52	27.8055	5.16	78.9	50.1	32.9
2012-08-09 08:57:52	27.75	5.02	76.7	50	32.9
2012-08-09 09:57:52	27.639	5.08	77.5	50.1	32.9
2012-08-09 10:57:52	27.6945	5.23	79.7	50	32.8
2012-08-09 11:57:52	27.861	4.98	76.2	50.1	32.9
2012-08-09 12:57:52	27.8055	4.95	75.6	50	32.9
2012-08-09 13:57:52	27.75	4.93	75.3	50.1	32.9
2012-08-09 14:57:52	27.75	4.96	75.6	50.1	32.9
2012-08-09 15:57:52	27.528	4.9	74.5	50.1	32.9
2012-08-09 16:57:52	27.8055	4.82	73.7	50	32.9
2012-08-09 17:57:52	27.8055	4.89	74.8	50.1	32.9
2012-08-09 18:57:52	27.8055	4.91	75.1	50.1	32.9
2012-08-09 19:57:52	27.75	4.95	75.6	50.1	32.9
2012-08-09 20:57:52	27.6945	5.06	77.2	50.1	32.9
2012-08-09 21:57:52	27.75	4.93	75.3	50.2	32.9
2012-08-09 22:57:52	27.639	4.82	73.4	50	32.9
2012-08-09 23:57:52	27.5835	4.84	73.7	50	32.9
2012-08-10 00:57:52	27.639	4.89	74.5	50.1	32.9
2012-08-10 01:57:52	27.972	4.91	75.1	50.2	33
2012-08-10 02:57:52	27.861	4.84	74	50	32.9
2012-08-10 03:57:52	27.8055	4.98	76.2	50.1	32.9
2012-08-10 04:57:52	27.75	5.02	76.7	50.1	32.9
2012-08-10 05:57:52	27.6945	4.87	74.3	50.1	32.9
2012-08-10 06:57:52	27.6945	4.95	75.6	50.1	32.9
2012-08-10 07:57:52	27.639	4.93	75.1	50.1	32.9
2012-08-10 08:57:52	27.861	4.92	75.3	50	33
2012-08-10 09:57:52	27.9165	4.96	75.9	50	32.9
2012-08-10 10:57:52	27.861	5.03	77	50.1	32.9
2012-08-10 11:57:52	27.6945	4.93	75.3	50.1	32.9
2012-08-10 12:57:52	27.75	5.06	77.2	50.2	32.9
2012-08-10 13:57:52	27.5835	5.18	78.9	50.2	32.9
2012-08-10 14:57:52	27.639	5.1	77.8	50	32.9
2012-08-10 15:57:52	27.8055	4.98	76.2	50	32.9
2012-08-10 16:57:52	27.861	5.06	77.5	50.1	33
2012-08-10 17:57:52	27.861	5.01	76.7	50	33
2012-08-10 18:57:52	27.75	5.18	79.1	50.1	32.9
2012-08-15 09:58:45	27.639	4.63	70.5	50	32.7
2012-08-15 10:58:45	27.639	4.57	69.7	49.9	32.8
2012-08-15 11:58:45	27.8055	4.17	63.7	49.9	32.9
2012-08-15 12:58:45	27.6945	5.18	79.1	50	32.9
2012-08-15 13:58:45	28.194	4.81	74	49.9	33.1
2012-08-15 14:58:45	28.1385	5.01	77	50.1	33
2012-08-15 15:58:45	28.194	5.05	77.8	49.9	33
2012-08-15 16:58:45	28.0275	5.14	78.9	49.9	33
2012-08-15 17:58:45	28.083	5.14	78.9	49.9	33
2012-08-15 18:58:45	27.972	5.14	78.9	49.9	33
2012-08-15 19:58:45	27.972	5.18	79.4	49.9	32.9
2012-08-15 20:58:45	28.083	5.15	79.1	49.9	32.9
2012-08-15 21:58:45	27.9165	5.19	79.4	49.9	32.9
2012-08-15 22:58:45	27.9165	5.27	80.8	49.9	32.9
2012-08-15 23:58:45	27.861	5.29	81	49.9	32.9
2012-08-16 00:58:45	27.6945	5.35	81.6	49.9	32.8
2012-08-16 01:58:45	27.75	5.38	82.1	50	32.8
2012-08-16 02:58:45	27.6945	5.35	81.6	49.8	32.7
2012-08-16 03:58:45	27.6945	5.35	81.6	49.8	32.7
2012-08-16 04:58:45	27.6945	5.39	82.1	49.8	32.7
2012-08-16 05:58:45	27.861	5.35	81.8	49.9	32.8
2012-08-16 06:58:45	27.8055	5.43	82.9	49.9	32.8
2012-08-16 07:58:45	27.8055	5.35	81.8	49.9	32.8
2012-08-16 08:58:45	27.75	5.45	83.2	49.9	32.7
2012-08-16 09:58:45	27.639	5.43	82.7	49.9	32.7
2012-08-16 10:58:45	27.75	5.43	82.9	50	32.7
2012-08-16 11:58:45	27.861	5.28	80.8	49.8	32.8
2012-08-16 12:58:45	27.861	5.07	77.5	49.9	32.8
2012-08-16 13:58:45	27.75	5.03	76.7	49.8	32.7
2012-08-16 14:58:45	27.639	5.11	77.8	50	32.7
2012-08-16 15:58:45	27.8055	5.05	77.2	50	32.8
2012-08-16 16:58:45	27.9165	4.98	76.2	50	32.9
2012-08-16 17:58:45	27.75	5.03	76.7	49.9	32.8
2012-08-16 18:58:45	27.75	4.97	75.9	49.8	32.8
2012-08-16 19:58:45	27.75	4.99	76.2	49.9	32.8
2012-08-16 20:58:45	27.6945	5.05	77	49.8	32.7
2012-08-16 21:58:45	27.639	5.11	77.8	49.9	32.7
2012-08-16 22:58:45	27.6945	5.14	78.3	49.9	32.7
2012-08-16 23:58:45	27.75	5.08	77.5	49.9	32.8
2012-08-17 00:58:45	27.861	5.16	78.9	49.9	32.8
2012-08-17 01:58:45	27.75	5.22	79.7	50	32.8
2012-08-17 02:58:45	27.8055	5.17	78.9	50	32.8
2012-08-17 03:58:45	27.6945	5.28	80.5	49.9	32.7
2012-08-17 04:58:45	27.6945	5.28	80.5	50	32.7
2012-08-17 05:58:45	27.75	5.22	79.7	49.8	32.8
2012-08-17 06:58:45	27.861	5.28	80.8	49.9	32.8
2012-08-17 07:58:45	27.861	5.34	81.6	49.9	32.8
2012-08-17 08:58:45	27.6945	5.35	81.6	50	32.8
2012-08-17 09:58:45	27.75	5.38	82.1	49.9	32.7
2012-08-17 10:58:45	27.6945	5.39	82.1	49.9	32.7
2012-08-17 11:58:45	27.639	5.44	82.9	50	32.7
2012-08-17 12:58:45	27.861	5.41	82.7	49.8	32.8
2012-08-17 13:58:45	27.9165	5.45	83.5	49.9	32.9
2012-08-17 14:58:45	27.861	5.42	82.9	49.9	32.8
2012-08-17 15:58:45	27.861	5.42	82.9	49.9	32.8
2012-08-17 16:58:45	27.8055	5.5	84	49.9	32.8
2012-08-17 17:58:45	27.639	5.46	83.2	49.9	32.8
2012-08-17 18:58:45	27.6945	5.53	84.3	49.9	32.7
2012-08-17 19:58:45	27.75	5.49	83.7	49.9	32.7
2012-08-17 20:58:45	27.5835	5.54	84.3	49.9	32.7
2012-08-17 21:58:45	27.861	5.53	84.6	49.9	32.8
2012-08-17 22:58:45	27.8055	5.57	85.1	49.9	32.9
2012-08-17 23:58:45	27.75	5.54	84.6	50	32.8
2012-08-18 00:58:45	27.6945	5.55	84.6	49.9	32.8
2012-08-18 01:58:45	27.6945	5.56	84.8	49.9	32.8
2012-08-18 02:58:45	27.75	5.52	84.3	50	32.8
2012-08-18 03:58:45	27.639	5.59	85.1	49.9	32.7
2012-08-18 04:58:45	27.639	5.5	83.7	49.8	32.7
2012-08-18 05:58:45	27.8055	5.59	85.4	50.1	32.9
2012-08-18 06:58:45	27.9165	5.56	85.1	50	32.9
2012-08-18 07:58:45	27.75	5.55	84.8	50	32.9
2012-08-18 08:58:45	27.8055	5.5	84	49.9	32.8
2012-08-18 09:58:45	27.6945	5.6	85.4	49.9	32.8
2012-08-18 10:58:45	27.639	5.61	85.4	49.9	32.8
2012-08-18 11:58:45	27.639	5.61	85.4	50	32.7
2012-08-18 12:58:45	27.6945	5.6	85.4	49.9	32.7
2012-08-18 13:58:45	27.639	5.62	85.6	50	32.7
2012-08-18 14:58:45	27.861	5.58	85.4	50	32.9
2012-08-18 15:58:45	27.8055	5.55	84.8	49.9	32.9
2012-08-18 16:58:45	27.861	5.58	85.4	49.9	32.8
2012-08-18 17:58:45	27.75	5.58	85.1	49.8	32.8
2012-08-18 18:58:45	27.6945	5.6	85.4	49.9	32.8
2012-08-18 19:58:45	27.639	5.64	85.9	49.9	32.8
2012-08-18 20:58:45	27.6945	5.58	85.1	49.8	32.7
2012-08-18 21:58:45	27.639	5.64	85.9	49.9	32.8
2012-08-18 22:58:45	27.8055	5.6	85.6	49.9	32.9
2012-08-18 23:58:45	27.8055	5.59	85.4	49.9	32.9
2012-08-19 00:58:45	27.75	5.56	84.8	49.9	32.8
2012-08-19 01:58:45	27.75	5.63	85.9	50	32.8
2012-08-19 02:58:45	27.639	5.59	85.1	50	32.8
2012-08-19 03:58:45	27.75	5.63	85.9	49.9	32.7
2012-08-19 04:58:45	27.75	5.58	85.1	50	32.8
2012-08-19 05:58:45	27.861	5.51	84.3	50	32.9
2012-08-19 06:58:45	27.9165	5.59	85.6	50.1	32.9
2012-08-19 07:58:45	27.8055	5.62	85.9	50.1	32.9
2012-08-19 08:58:45	27.639	5.66	86.2	49.9	32.8
2012-08-19 09:58:45	27.639	5.68	86.5	50	32.8
2012-08-19 10:58:45	27.639	5.68	86.5	49.9	32.8
2012-08-19 11:58:45	27.6945	5.58	85.1	49.9	32.8
2012-08-19 12:58:45	27.972	5.58	85.6	50	32.9
2012-08-19 15:05:22	27.75	5.5	84	50	32.8
2012-08-19 16:05:22	27.639	5.5	83.7	49.9	32.7
2012-08-19 17:05:22	27.8055	5.46	83.5	50	32.9
2012-08-19 18:05:22	27.9165	5.4	82.7	49.9	32.9
2012-08-19 19:05:22	27.861	5.37	82.1	49.9	32.9
2012-08-19 20:05:22	27.75	5.36	81.8	50	32.9
2012-08-19 21:05:22	27.639	5.44	82.9	49.9	32.8
2012-08-19 22:05:22	27.75	5.43	82.9	50	32.8
2012-08-19 23:05:22	27.528	5.38	81.8	50	32.7
2012-08-20 00:05:22	27.75	5.45	83.2	50	32.9
2012-08-20 01:05:22	27.75	5.43	82.9	50.1	32.9
2012-08-20 02:05:22	27.75	5.47	83.5	50	32.9
2012-08-20 03:05:22	27.8055	5.5	84	49.9	32.8
2012-08-20 04:05:22	27.639	5.48	83.5	50	32.8
2012-08-20 05:05:22	27.75	5.56	84.8	50	32.8
2012-08-20 06:05:22	27.972	5.48	84	50.1	32.9
2012-08-20 07:05:22	27.75	5.52	84.3	50	32.9
2012-08-20 08:05:22	27.8055	5.55	84.8	49.9	32.8
2012-08-20 09:05:22	27.6945	5.55	84.6	49.9	32.8
2012-08-20 10:05:22	27.639	5.59	85.1	50	32.7
2012-08-20 11:05:22	27.75	5.35	81.6	50	32.8
2012-08-20 12:05:22	27.861	5.14	78.6	49.9	32.7
2012-08-20 13:05:22	27.861	5.35	81.8	49.9	32.8
2012-08-20 14:05:22	27.6945	5.3	80.8	49.8	32.7
2012-08-20 15:05:22	27.75	5.26	80.2	49.8	32.7
2012-08-20 16:05:22	27.75	5.37	81.8	49.8	32.7
2012-08-20 17:05:22	27.5835	5.45	82.9	49.8	32.7
2012-08-20 18:05:22	27.75	5.4	82.4	49.8	32.7
2012-08-20 19:05:22	27.9165	5.4	82.7	49.8	32.8
2012-08-20 20:05:22	27.861	5.5	84	49.8	32.7
2012-08-20 21:05:22	27.6945	5.56	84.8	49.9	32.7
2012-08-20 22:05:22	27.6945	5.6	85.4	49.9	32.7
2012-08-20 23:05:22	27.639	5.51	84	49.7	32.6
2012-08-21 00:05:22	27.6945	5.57	84.8	49.8	32.7
2012-08-21 01:05:22	27.75	5.6	85.4	49.8	32.8
2012-08-21 02:05:22	27.75	5.61	85.6	49.8	32.7
2012-08-21 03:05:22	27.6945	5.55	84.6	49.7	32.7
2012-08-21 04:05:22	27.6945	5.55	84.6	49.8	32.7
2012-08-21 05:05:22	27.75	5.65	86.2	49.9	32.7
2012-08-21 06:05:22	27.639	5.64	85.9	49.9	32.7
2012-08-21 07:05:22	27.8055	5.64	86.2	49.9	32.8
2012-08-21 08:05:22	27.9165	5.59	85.6	49.9	32.8
2012-08-21 09:05:22	27.75	5.68	86.7	49.9	32.8
2012-08-21 10:05:22	27.6945	5.71	87	49.9	32.7
2012-08-21 11:05:22	27.6945	5.64	85.9	49.9	32.7
2012-08-21 12:05:22	27.5835	5.49	83.5	49.7	32.6
2012-08-21 13:05:22	27.6945	5.48	83.5	49.9	32.7
2012-08-21 14:05:22	27.8055	5.34	81.6	49.8	32.8
2012-08-21 15:05:22	27.75	5.4	82.4	49.8	32.7
2012-08-21 16:05:22	27.6945	5.31	81	49.8	32.7
2012-08-21 17:05:22	27.8055	5.25	80.2	49.8	32.8
2012-08-21 18:05:22	27.9165	5.26	80.5	49.8	32.8
2012-08-21 19:05:22	27.861	5.25	80.2	49.8	32.8
2012-08-21 20:05:22	27.75	5.26	80.2	49.8	32.7
2012-08-21 21:05:22	27.639	5.27	80.2	49.8	32.7
2012-08-21 22:05:22	27.6945	5.35	81.6	49.8	32.7
2012-08-21 23:05:22	27.6945	5.41	82.4	49.9	32.7
2012-08-22 00:05:22	27.9165	5.33	81.6	49.9	32.8
2012-08-22 01:05:22	27.9165	5.29	81	49.8	32.8
2012-08-22 02:05:22	27.75	5.38	82.1	50	32.8
2012-08-22 03:05:22	27.75	5.33	81.3	49.8	32.7
2012-08-22 04:05:22	27.75	5.33	81.3	49.8	32.7
2012-08-22 05:05:22	27.6945	5.41	82.4	49.8	32.7
2012-08-22 06:05:22	27.5835	5.44	82.7	49.9	32.7
2012-08-22 07:05:22	27.972	5.34	81.8	49.8	32.8
2012-08-22 09:59:39	27.861	5.5	84	49.8	32.8
2012-08-22 10:59:39	27.6945	5.49	83.7	49.9	32.6
2012-08-22 11:59:39	27.639	5.32	81	49.7	32.6
2012-08-22 12:59:39	27.639	5.14	78.3	49.7	32.7
2012-08-22 13:59:39	27.861	5.26	80.5	49.8	32.9
2012-08-22 14:59:39	27.8055	5.3	81	49.8	32.9
2012-08-22 15:59:39	27.861	5.32	81.3	49.9	32.8
2012-08-22 16:59:39	27.75	5.31	81	49.9	32.7
2012-08-22 17:59:39	27.75	5.36	81.8	49.9	32.7
2012-08-22 18:59:39	27.6945	5.33	81.3	49.8	32.7
2012-08-22 19:59:39	27.6945	5.41	82.4	49.8	32.7
2012-08-22 20:59:39	27.6945	5.41	82.4	49.9	32.7
2012-08-22 21:59:39	27.861	5.39	82.4	49.8	32.9
2012-08-22 22:59:39	27.861	5.42	82.9	49.9	32.8
2012-08-22 23:59:39	27.75	5.47	83.5	49.8	32.7
2012-08-23 00:59:39	27.75	5.43	82.9	49.8	32.7
2012-08-23 01:59:39	27.6945	5.53	84.3	49.9	32.7
2012-08-23 02:59:39	27.5835	5.49	83.5	49.8	32.7
2012-08-23 03:59:39	27.861	5.5	84	49.9	32.7
2012-08-23 04:59:39	27.861	5.47	83.7	49.9	32.8
2012-08-23 05:59:39	27.8055	5.5	84	49.9	32.7
2012-08-23 06:59:39	27.75	5.42	82.7	49.7	32.7
2012-08-23 07:59:39	27.6945	5.53	84.3	49.9	32.7
2012-08-23 08:59:39	27.639	5.52	84	49.8	32.7
2012-08-23 09:59:39	27.639	5.57	84.8	49.7	32.7
2012-08-23 10:59:39	27.861	5.56	85.1	49.9	32.8
2012-08-23 11:59:39	27.8055	5.34	81.6	49.8	32.8
2012-08-23 12:59:39	27.75	5.38	82.1	49.9	32.7
2012-08-23 13:59:39	27.639	5.37	81.8	49.9	32.7
2012-08-23 14:59:39	27.861	5.34	81.8	49.8	32.9
2012-08-23 15:59:39	27.8055	5.34	81.6	49.9	32.7
2012-08-23 16:59:39	27.75	5.35	81.6	49.9	32.8
2012-08-23 17:59:39	27.5835	5.36	81.6	49.9	32.7
2012-08-23 18:59:39	27.861	5.37	82.1	49.9	32.9
2012-08-23 19:59:39	27.8055	5.39	82.4	49.9	32.9
2012-08-23 20:59:39	27.8055	5.37	82.1	50	32.8
2012-08-23 21:59:39	27.75	5.42	82.7	49.8	32.7
2012-08-23 22:59:39	27.75	5.48	83.7	49.8	32.7
2012-08-23 23:59:39	27.6945	5.58	85.1	50	32.8
2012-08-24 00:59:39	27.639	5.57	84.8	49.9	32.7
2012-08-24 01:59:39	27.639	5.59	85.1	49.9	32.7
2012-08-24 02:59:39	27.972	5.57	85.4	50	32.9
2012-08-24 03:59:39	27.861	5.57	85.1	49.9	32.8
2012-08-24 04:59:39	27.75	5.57	85.1	49.8	32.8
2012-08-24 05:59:39	27.75	5.6	85.4	49.9	32.8
2012-08-24 06:59:39	27.639	5.61	85.4	49.9	32.7
2012-08-24 07:59:39	27.639	5.57	84.8	49.9	32.7
2012-08-24 08:59:39	27.6945	5.61	85.6	49.7	32.8
2012-08-24 09:59:39	27.861	5.65	86.5	49.9	32.9
2012-08-24 10:59:39	27.861	5.64	86.2	50	32.8
2012-08-24 11:59:39	27.8055	5.66	86.5	50	32.8
2012-08-24 12:59:39	27.75	5.67	86.5	49.8	32.8
2012-08-24 13:59:39	27.639	5.71	87	50	32.7
2012-08-24 14:59:39	27.639	5.77	87.8	50	32.8
2012-08-24 15:59:39	27.6945	5.66	86.2	49.9	32.7
2012-08-24 16:59:39	27.861	5.65	86.5	50	32.9
2012-08-24 17:59:39	27.6945	5.65	86.2	50.1	32.9
2012-08-24 18:59:39	27.861	5.63	85.9	49.9	32.9
2012-08-24 19:59:39	27.75	5.58	85.1	49.8	32.8
2012-08-24 20:59:39	27.5835	5.67	86.2	49.9	32.8
2012-08-24 21:59:39	27.639	5.75	87.5	49.9	32.7
2012-08-24 22:59:39	27.639	5.76	87.8	50	32.8
2012-08-24 23:59:39	27.75	5.77	88.1	50	32.8
2012-08-25 00:59:39	27.861	5.72	87.5	49.9	32.9
2012-08-25 01:59:39	27.8055	5.72	87.5	50	32.9
2012-08-25 02:59:39	27.8055	5.74	87.8	49.9	32.8
2012-08-25 03:59:39	27.75	5.79	88.4	49.8	32.7
2012-08-25 04:59:39	27.6945	5.8	88.4	50	32.8
2012-08-25 05:59:39	27.639	5.74	87.5	49.9	32.7
2012-08-25 06:59:39	27.6945	5.78	88.1	50	32.8
2012-08-25 07:59:39	27.9165	5.65	86.5	49.9	32.9
2012-08-25 08:59:39	27.861	5.71	87.3	49.9	32.8
2012-08-25 09:59:39	27.8055	5.71	87.3	49.8	32.9
2012-08-25 10:59:39	27.75	5.75	87.8	50	32.9
2012-08-25 11:59:39	27.639	5.78	88.1	50	32.9
2012-08-25 12:59:39	27.75	5.78	88.1	50	32.7
2012-08-25 13:59:39	27.6945	5.81	88.6	49.9	32.8
2012-08-25 14:59:39	27.861	5.79	88.6	50.1	33
2012-08-25 15:59:39	27.861	5.78	88.4	49.9	32.8
2012-08-25 16:59:39	27.8055	5.74	87.8	49.9	32.9
2012-08-25 17:59:39	27.75	5.79	88.4	50	32.9
2012-08-25 18:59:39	27.8055	5.8	88.6	49.8	32.8
2012-08-25 19:59:39	27.6945	5.83	88.9	50.1	32.8
2012-08-25 20:59:39	27.6945	5.78	88.1	49.9	32.7
2012-08-25 21:59:39	27.639	5.76	87.8	50	32.7
2012-08-25 22:59:39	27.861	5.79	88.6	50	32.9
2012-08-25 23:59:39	27.861	5.79	88.6	49.8	32.9
2012-08-26 00:59:39	27.861	5.79	88.6	49.9	32.9
2012-08-26 01:59:39	27.861	5.84	89.2	50	32.8
2012-08-26 02:59:39	27.8055	5.82	88.9	49.9	32.8
2012-08-26 03:59:39	27.6945	5.86	89.4	50	32.8
2012-08-26 04:59:39	27.6945	6.03	91.9	50	32.8
2012-08-26 05:59:39	27.6945	0	0	49.9	32.8
2012-08-26 06:59:39	27.75	0	0	49.9	32.8
2012-08-26 07:59:39	27.861	0	0	49.9	32.9
2012-08-26 08:59:39	27.861	0	0	50	32.9
2012-08-26 09:59:39	27.8055	0	0	49.9	32.9
2012-08-26 10:59:39	27.8055	0	0	50	32.8
2012-08-26 11:59:39	27.8055	0	0	49.9	32.8
2012-08-26 12:59:39	25.0305	0	0	0.2151	0	Calibration of probes
2012-08-26 13:59:39	25.1415	0	0	0.1825	0
2012-08-26 14:59:39	25.197	0	0	0.1691	0
2012-08-26 15:59:39	25.3635	0	0	0.1612	0
2012-08-26 16:59:39	28.638	4.84	75	50.1	32.8
2012-08-26 17:59:39	28.305	4.74	73.2	50	33.2
2012-08-26 18:59:39	28.0275	4.66	71.6	50.1	33
2012-08-26 19:59:39	28.0275	4.6	70.6	50	33
2012-08-26 20:59:39	27.972	4.71	72.2	49.9	33
2012-08-26 21:59:39	27.972	4.57	70.1	50	33
2012-08-26 22:59:39	27.9165	4.63	70.9	49.9	32.9
2012-08-26 23:59:39	27.861	4.8	73.5	50	32.9
2012-08-27 00:59:39	27.861	4.79	73.5	49.9	32.9
2012-08-27 01:59:39	27.8055	4.82	73.7	50	32.9
2012-08-27 02:59:39	27.6945	4.76	72.7	49.9	32.9
2012-08-27 03:59:39	27.75	4.83	73.7	50	32.8
2012-08-27 04:59:39	27.639	4.92	75	49.9	32.8
2012-08-27 05:59:39	27.639	4.93	75	50	32.8
2012-08-27 06:59:39	27.6945	4.97	75.8	49.9	32.9
2012-08-27 07:59:39	27.861	4.84	74	50	32.9
2012-08-27 08:59:39	27.861	4.88	74.7	50.1	32.9
2012-08-27 09:59:39	27.75	4.93	75.3	50	32.9
2012-08-27 10:59:39	27.639	4.89	74.5	50	32.8
2012-08-27 11:59:39	27.639	4.89	74.5	49.9	32.8
2012-08-27 12:59:39	27.639	4.96	75.5	50	32.8
2012-08-27 13:59:39	27.639	4.89	74.5	50	32.8
2012-08-27 14:59:39	27.861	4.94	75.5	50	32.9
2012-08-27 15:59:39	27.861	4.92	75.3	50	32.9
2012-08-27 16:59:39	27.8055	5	76.3	50	32.9
2012-08-27 17:59:39	27.861	5.06	77.1	50.1	32.9
2012-08-27 18:59:39	27.6945	5.02	76.5	50	32.8
2012-08-27 19:59:39	27.639	4.99	76	50	32.8
2012-08-27 20:59:39	27.639	4.99	76	50.1	32.7
2012-08-27 21:59:39	27.861	4.84	74	50	32.9
2012-09-12 10:02:17	27.8055	0	0	50.7	33.2
2012-09-12 11:02:17	27.75	0	0	50.7	33.2
2012-09-12 12:02:17	27.6945	0	0	50.6	33.2
2012-09-12 13:02:17	27.972	0	0	50.6	33.3
2012-09-12 14:02:17	27.75	0	0	50.6	33.3
2012-09-12 15:02:17	27.75	0	0	50.6	33.3
2012-09-12 16:02:17	27.75	0	0	50.7	33.2
2012-09-12 17:02:17	27.639	0	0	50.5	33.2
2012-09-12 18:02:17	27.75	0	0	50.6	33.3
2012-09-12 19:02:17	27.861	0	0	50.6	33.3
2012-09-12 20:02:17	27.8055	0	0	50.7	33.3
2012-09-12 21:02:17	27.75	0	0	50.7	33.3
2012-09-12 22:02:17	27.75	0	0	50.6	33.3
2012-09-12 23:02:17	27.6945	0	0	50.6	33.2
2012-09-13 00:02:17	27.75	0	0	50.7	33.2
2012-09-13 01:02:17	27.861	0	0	50.6	33.3
2012-09-13 02:02:17	27.861	0	0	50.7	33.3
2012-09-13 03:02:17	27.861	0	0	50.6	33.3
2012-09-13 04:02:17	27.6945	0	0	50.7	33.2
2012-09-13 05:02:17	27.6945	0	0	50.5	33.2
2012-09-13 06:02:17	27.75	0	0	50.7	33.3
2012-09-13 07:02:17	27.8055	0	0	50.7	33.3
2012-09-13 08:02:17	27.75	0	0	50.6	33.3
2012-09-13 09:02:17	27.639	0	0	50.5	33.3
2012-09-13 10:02:17	27.6945	0	0	50.6	33.3
2012-09-13 11:02:17	27.6945	0	0	50.7	33.2
2012-09-13 12:02:17	27.861	0	0	50.6	33.4
2012-09-13 13:02:17	27.8055	0	0	50.7	33.3
2012-09-13 14:02:17	27.639	0	0	50.7	33.2
2012-09-13 15:02:17	27.75	0	0	50.7	33.3
2012-09-13 16:02:17	27.75	0	0	50.6	33.4
2012-09-13 17:02:17	27.8055	0	0	50.7	33.4
2012-09-13 18:02:17	27.8055	0	0	50.6	33.3
2012-09-13 19:02:17	27.75	0	0	50.8	33.3
2012-09-13 20:02:17	27.8055	0	0	50.8	33.3
2012-09-13 21:02:17	27.6945	0	0	50.7	33.2
2012-09-13 22:02:17	27.639	0	0	50.8	33.3
2012-09-13 23:02:17	27.9165	0	0	50.6	33.4
2012-09-14 00:02:17	27.8055	0	0	50.6	33.3
2012-09-14 01:02:17	27.75	0	0	50.7	33.3
2012-09-14 02:02:17	27.639	0	0	50.8	33.3
2012-09-14 03:02:17	27.639	0	0	50.7	33.3
2012-09-14 04:02:17	27.75	0	0	50.7	33.3
2012-09-14 05:02:17	27.75	0	0	50.7	33.4
2012-09-14 06:02:17	27.75	0	0	50.8	33.3
2012-09-14 07:02:17	27.861	0	0	50.7	33.3
2012-09-14 08:02:17	27.75	0	0	50.8	33.3
2012-09-14 09:02:17	27.75	0	0	50.7	33.2
2012-09-14 10:02:17	27.9165	0	0	50.7	33.4
2012-09-14 11:02:17	27.8055	0	0	50.7	33.4
2012-09-14 12:02:17	27.6945	0	0	50.6	33.3
2012-09-14 13:02:17	27.75	0	0	50.9	33.3
2012-09-14 14:02:17	27.6945	0	0	50.8	33.3
2012-09-14 15:02:17	27.6945	0	0	50.8	33.3
2012-09-14 16:02:17	27.9165	0	0	50.7	33.4
2012-09-14 17:02:17	27.8055	0	0	50.7	33.4
2012-09-14 18:02:17	27.75	0	0	50.8	33.3
2012-09-14 19:02:17	27.75	0	0	50.7	33.3
2012-09-14 20:02:17	27.6945	0	0	50.8	33.3
2012-09-14 21:02:17	27.639	0	0	50.7	33.3
2012-09-14 22:02:17	27.861	0	0	50.7	33.4
2012-09-14 23:02:17	27.861	0	0	50.7	33.4
2012-09-15 00:02:17	27.8055	0	0	50.8	33.4
2012-09-15 01:02:17	27.861	0	0	50.9	33.3
2012-09-15 02:02:17	27.75	0	0	50.7	33.3
2012-09-15 03:02:17	27.6945	0	0	50.8	33.3
2012-09-15 04:02:17	27.8055	0	0	50.8	33.4
2012-09-15 05:02:17	27.9165	0	0	50.8	33.4
2012-09-15 06:02:17	27.861	0	0	50.8	33.4
2012-09-15 07:02:17	27.861	0	0	50.7	33.3
2012-09-15 08:02:17	27.6945	0	0	50.8	33.3
2012-09-15 09:02:17	27.75	0	0	50.9	33.4
2012-09-15 10:02:17	27.861	0	0	50.7	33.4
2012-09-15 11:02:17	27.75	0	0	50.8	33.4
2012-09-15 12:02:17	27.75	0	0	50.8	33.3
2012-09-15 13:02:17	27.6945	0	0	50.8	33.3
2012-09-15 14:02:17	27.6945	0	0	50.8	33.3
2012-09-15 15:02:17	27.861	0	0	50.7	33.4
2012-09-15 16:02:17	27.8055	0	0	50.8	33.4
2012-09-15 17:02:17	27.75	0	0	50.8	33.4
2012-09-15 18:02:17	27.75	0	0	50.8	33.3
2012-09-15 19:02:17	27.75	0	0	50.8	33.3
2012-09-15 20:02:17	27.5835	0	0	50.7	33.3
2012-09-15 21:02:17	27.861	0	0	50.8	33.4
2012-09-15 22:02:17	27.8055	0	0	50.8	33.4
2012-09-15 23:02:17	27.861	0	0	50.8	33.4
2012-09-16 00:02:17	27.75	0	0	50.7	33.4
2012-09-16 01:02:17	27.75	0	0	50.8	33.3
2012-09-16 02:02:17	27.8055	0	0	50.8	33.4
2012-09-16 03:02:17	27.861	0	0	50.7	33.4
2012-09-16 04:02:17	27.861	0	0	50.8	33.4
2012-09-16 05:02:17	27.8055	0	0	50.9	33.4
2012-09-16 06:02:17	27.6945	0	0	50.8	33.4
2012-09-16 07:02:17	27.639	0	0	50.8	33.3
2012-09-16 08:02:17	27.75	0	0	50.8	33.4
2012-09-16 09:02:17	27.8055	0	0	50.9	33.4
2012-09-16 10:02:17	27.8055	0	0	50.7	33.4
2012-09-16 11:02:17	27.6945	0	0	50.9	33.4
2012-09-16 12:02:17	27.75	0	0	50.7	33.3
2012-09-16 13:02:17	27.861	0	0	50.9	33.4
2012-09-16 14:02:17	27.861	0	0	50.8	33.4
2012-09-16 15:02:17	27.8055	0	0	50.8	33.4
2012-09-16 16:02:17	27.75	0	0	50.8	33.4
2012-09-16 17:02:17	27.639	0	0	50.9	33.4
2012-09-16 18:02:17	27.861	0	0	50.9	33.5
2012-09-16 19:02:17	27.8055	0	0	50.8	33.4
2012-09-16 20:02:17	27.75	0	0	50.7	33.4
2012-09-16 21:02:17	27.861	0	0	50.7	33.4
2012-09-16 22:02:17	27.75	0	0	50.9	33.4
2012-09-16 23:02:17	27.639	0	0	50.9	33.4
2012-09-17 00:02:17	27.75	0	0	50.8	33.4
2012-09-17 01:02:17	27.861	0	0	50.9	33.5
2012-09-17 02:02:17	27.8055	0	0	50.9	33.4
2012-09-17 03:02:17	27.75	0	0	50.8	33.4
2012-09-17 04:02:17	27.75	0	0	50.9	33.4
2012-09-17 05:02:17	27.639	0	0	50.9	33.4
2012-09-17 06:02:17	27.75	0	0	51	33.4
2012-09-17 07:02:17	27.861	0	0	51	33.5
2012-09-17 08:02:17	27.9165	0	0	51	33.4
2012-09-17 09:02:17	27.75	0	0	50.9	33.4
2012-09-17 10:02:17	27.75	0	0	50.8	33.4
2012-09-17 11:02:17	27.6945	0	0	50.9	33.4
2012-09-17 12:02:17	27.75	0	0	50.9	33.4
2012-09-17 13:02:17	27.8055	0	0	50.9	33.4
2012-09-17 14:02:17	27.861	0	0	51	33.5
2012-09-17 15:02:17	27.75	0	0	50.9	33.4
2012-09-17 16:02:17	27.528	0	0	49.7	32.5
2012-09-17 17:02:17	27.861	0	0	49.8	32.7
2012-09-17 18:02:17	27.861	0	0	49.7	32.7
2012-09-17 19:02:17	27.861	0	0	49.7	32.7
2012-09-17 20:02:17	27.8055	0	0	49.7	32.7
2012-09-17 21:02:17	27.75	0	0	49.7	32.7
2012-09-17 22:02:17	27.75	0	0	49.7	32.6
2012-09-17 23:02:17	27.639	0	0	49.7	32.6
2012-09-18 00:02:17	27.5835	0	0	49.9	33.3
2012-09-18 01:02:17	27.417	0	0	49.6	32.4
2012-09-18 02:02:17	27.2505	0	0	49.7	33.1
2012-09-18 03:02:17	27.1395	0	0	49.7	33
2012-09-18 04:02:17	26.973	0	0	49.7	32.6
2012-09-18 05:02:17	26.862	0	0	49.7	32.5
2012-09-18 06:02:17	26.64	0	0	49.8	32.4
2012-09-18 07:02:17	26.5845	0	0	49.7	32.3
2012-09-18 08:02:17	26.4735	0	0	49.7	32.3
2012-09-18 09:02:17	26.4735	0	0	49.8	32.3
2012-09-19	26.8
2012-09-20	27.7
2012-09-21	27.7
2012-09-22	27.7
2012-09-23	27.8
2012-09-24	27.8
2012-09-25	27.7
2012-09-26	27.8
2012-09-27	27.8
2012-09-28	27.8
2012-09-29	27.8
2012-09-30	27.8
2012-10-01	27.9
2012-10-02
2012-10-03 10:04:52	27.6945	5.35	81.7	50.2	33
2012-10-03 11:04:52	27.6945	5.37	82	50.3	33
2012-10-03 12:04:52	27.639	5.46	83.3	50.3	33
2012-10-03 13:04:52	27.5835	5.52	84	50.3	33
2012-10-03 14:04:52	27.639	5.15	78.4	49.9	32.7
2012-10-03 15:04:52	27.861	5.28	80.7	49.9	32.7
2012-10-03 16:04:52	27.8055	5.31	81	49.8	32.7
2012-10-03 17:04:52	27.75	5.27	80.4	49.7	32.7
2012-10-03 18:04:52	27.8055	5.38	82.2	49.7	32.6
2012-10-03 19:04:52	27.6945	5.5	83.8	49.7	32.6
2012-10-03 20:04:52	27.75	5.46	83.3	49.7	32.6
2012-10-03 21:04:52	27.639	5.49	83.5	49.7	32.5
2012-10-03 22:04:52	27.4725	5.5	83.8	49.9	32.5
2012-10-03 23:04:52	27.3615	5.43	82.5	49.7	33.1
2012-10-04 00:04:52	27.195	5.6	84.8	49.8	33.1
2012-10-04 01:04:52	27.0285	5.52	83.3	49.7	33
2012-10-04 02:04:52	26.9175	5.66	85.1	49.8	32.6
2012-10-04 03:04:52	26.751	5.62	84.3	49.7	32.5
2012-10-04 04:04:52	26.64	5.64	84.3	49.7	32.4
2012-10-04 05:04:52	26.4735	5.68	84.6	49.8	32.3
2012-10-04 06:04:52	26.307	5.77	86.1	49.8	32.9
2012-10-04 07:04:52	26.307	5.72	85.3	49.7	32.8
2012-10-04 08:04:52	26.085	5.78	85.8	49.8	32.7
2012-10-04 09:04:52	26.085	5.8	86.1	49.7	32.7
2012-10-04 10:04:52	26.196	5.75	85.6	49.7	32.8
2012-10-04 11:04:52	26.418	5.72	85.1	49.7	32.9
2012-10-04 12:04:52	26.5845	5.65	84.3	49.7	32.3
2012-10-04 13:04:52	26.751	5.62	84.3	49.8	32.5
2012-10-04 14:04:52	27.0285	5.5	82.8	49.7	32.6
2012-10-04 15:04:52	27.084	5.49	83	49.7	33
2012-10-04 16:04:52	27.306	5.47	83	49.7	33.1
2012-10-04 17:04:52	27.528	5.47	83	49.8	32.5
2012-10-04 18:04:52	27.6945	5.33	81.2	49.6	32.6
2012-10-04 19:04:52	27.75	5.32	81.2	49.7	32.7
2012-10-04 20:04:52	27.861	5.3	81	49.7	32.7
2012-10-04 21:04:52	27.75	5.36	81.7	49.7	32.7
2012-10-04 22:04:52	27.639	5.4	82.2	49.7	32.7
2012-10-04 23:04:52	27.75	5.38	82	49.7	32.7
2012-10-05 00:04:52	27.5835	5.39	82	49.7	32.6
2012-10-05 01:04:52	27.639	5.47	83.3	49.8	32.6
2012-10-05 02:04:52	27.8055	5.5	84	49.8	32.7
2012-10-05 03:04:52	27.861	5.45	83.3	49.8	32.8
2012-10-05 04:04:52	27.8055	5.38	82.2	49.7	32.7
2012-10-05 05:04:52	27.8055	5.47	83.5	49.9	32.7
2012-10-05 06:04:52	27.6945	5.38	82	49.7	32.7
2012-10-05 07:04:52	27.75	5.44	83	49.7	32.6
2012-10-05 08:04:52	27.75	5.47	83.5	49.9	32.7
2012-10-05 09:04:52	27.8055	5.5	84	49.8	32.8
2012-10-05 10:04:52	27.8055	5.49	83.8	49.7	32.7
2012-10-05 11:04:52	27.6945	5.51	84	49.7	32.7
2012-10-05 12:04:52	27.8055	5.5	84	49.8	32.7
2012-10-05 13:04:52	27.639	5.56	84.6	49.8	32.7
2012-10-05 14:04:52	27.5835	5.54	84.3	49.7	32.7
2012-10-05 15:04:52	27.639	5.56	84.6	49.7	32.7
2012-10-05 16:04:52	27.8055	5.52	84.3	49.7	32.8
2012-10-05 17:04:52	27.8055	5.49	83.8	49.8	32.8
2012-10-05 18:04:52	27.8055	5.54	84.6	49.8	32.7
2012-10-05 19:04:52	27.861	5.5	84	49.8	32.7
2012-10-05 20:04:52	27.6945	5.58	85.1	49.8	32.7
2012-10-05 21:04:52	27.639	5.57	84.8	49.7	32.7
2012-10-05 22:04:52	27.639	5.6	85.3	49.7	32.7
2012-10-05 23:04:52	27.75	5.61	85.6	49.9	32.7
2012-10-06 00:04:52	27.972	5.56	85.1	49.7	32.8
2012-10-06 01:04:52	27.861	5.58	85.3	49.8	32.7
2012-10-06 02:04:52	27.8055	5.59	85.3	49.9	32.7
2012-10-06 03:04:52	27.8055	5.57	85.1	49.8	32.7
2012-10-06 04:04:52	27.6945	5.58	85.1	49.8	32.7
2012-10-06 05:04:52	27.528	5.67	86.1	49.9	32.7
2012-10-06 06:04:52	27.75	5.56	84.8	49.8	32.7
2012-10-06 07:04:52	27.9165	5.59	85.6	49.9	32.8
2012-10-06 08:04:52	27.861	5.53	84.6	49.9	32.7
2012-10-06 09:04:52	27.6945	5.65	86.1	49.8	32.7
2012-10-06 10:04:52	27.75	5.61	85.6	49.9	32.7
2012-10-06 11:04:52	27.5835	5.59	85.1	49.7	32.7
2012-10-06 12:04:52	27.639	5.62	85.6	49.8	32.6
2012-10-06 13:04:52	27.639	5.65	86.1	49.9	32.7
2012-10-06 14:04:52	27.8055	5.64	86.1	49.8	32.8
2012-10-06 15:04:52	27.75	5.62	85.8	49.9	32.8
2012-10-06 16:04:52	27.861	5.58	85.3	49.9	32.7
2012-10-06 17:04:52	27.8055	5.64	86.1	49.8	32.7
2012-10-06 18:04:52	27.639	5.65	86.1	49.8	32.7
2012-10-06 19:04:52	27.6945	5.7	86.9	50	32.7
2012-10-06 20:04:52	27.5835	5.71	86.9	49.9	32.7
2012-10-06 21:04:52	27.639	5.59	85.1	49.7	32.7
2012-10-06 22:04:52	27.861	5.63	86.1	49.9	32.8
2012-10-06 23:04:52	27.9165	5.63	86.1	49.8	32.8
2012-10-07 00:04:52	27.6945	5.67	86.4	50	32.8
2012-10-07 01:04:52	27.75	5.66	86.4	49.8	32.7
2012-10-07 02:04:52	27.75	5.68	86.6	49.8	32.7
2012-10-07 03:04:52	27.639	5.71	86.9	50	32.7
2012-10-07 04:04:52	27.6945	5.72	87.1	49.8	32.7
2012-10-07 05:04:52	27.861	5.6	85.6	49.8	32.8
2012-10-07 06:04:52	27.8055	5.67	86.6	49.8	32.8
2012-10-07 07:04:52	27.8055	5.64	86.1	49.7	32.7
2012-10-07 08:04:52	27.75	5.71	87.1	49.9	32.7
2012-10-07 09:04:52	27.75	5.64	86.1	49.9	32.7
2012-10-07 10:04:52	27.75	5.73	87.4	49.9	32.7
2012-10-07 11:04:52	27.639	5.71	86.9	49.8	32.7
2012-10-07 12:04:52	27.9165	5.71	87.4	49.9	32.8
2012-10-08	27.8
2012-10-09	26.7
2012-10-10 10:05:42	26.64	5.72	85.6	49.8	32.4
2012-10-10 11:05:42	26.8065	5.7	85.6	49.9	32.6
2012-10-10 12:05:42	26.862	5.66	85.1	49.8	32.6
2012-10-10 13:05:42	26.751	5.72	85.8	49.9	32.6
2012-10-10 14:05:42	26.751	5.69	85.3	49.8	32.6
2012-10-10 15:05:42	26.6955	5.77	86.4	49.9	32.5
2012-10-10 16:05:42	26.751	5.73	85.8	49.9	32.5
2012-10-10 17:05:42	26.64	5.75	86.1	49.9	32.5
2012-10-10 18:05:42	26.8065	5.67	85.1	49.9	32.6
2012-10-10 19:05:42	26.751	5.72	85.8	49.8	32.5
2012-10-10 20:05:42	26.751	5.78	86.6	49.8	32.5
2012-10-10 21:05:42	26.6955	5.8	86.9	49.9	32.5
2012-10-10 22:05:42	26.64	5.81	86.9	49.8	32.4
2012-10-10 23:05:42	26.6955	5.82	87.1	49.9	32.5
2012-10-11 00:05:42	26.862	5.8	87.4	49.9	33
2012-10-11 01:05:42	26.9175	5.83	87.4	49.9	32.6
2012-10-11 02:05:42	26.751	5.86	87.9	49.9	32.6
2012-10-11 03:05:42	26.8065	5.77	86.6	49.8	32.5
2012-10-11 04:05:42	26.751	5.8	86.9	49.8	32.5
2012-10-11 05:05:42	26.5845	5.86	87.6	49.8	32.4
2012-10-11 06:05:42	26.64	5.84	87.4	49.9	32.5
2012-10-11 07:05:42	26.8065	5.66	85.1	49.8	32.6
2012-10-11 08:05:42	26.862	5.66	85.1	49.8	32.6
2012-10-11 09:05:42	26.862	5.7	85.6	49.8	32.6
2012-10-11 10:05:42	26.6955	5.72	85.8	49.8	32.6
2012-10-11 11:05:42	26.6955	5.77	86.4	49.9	32.5
2012-10-11 12:05:42	26.64	5.77	86.4	49.9	32.5
2012-10-11 13:05:42	26.751	5.75	86.1	49.9	32.5
2012-10-11 14:05:42	26.9175	5.63	84.6	49.8	32.6
2012-10-11 15:05:42	26.862	5.59	84	49.9	32.6
2012-10-11 16:05:42	26.751	5.53	83	49.9	32.6
2012-10-11 17:05:42	26.8065	5.55	83.3	49.8	32.6
2012-10-11 18:05:42	26.6955	5.6	83.8	49.9	32.5
2012-10-11 19:05:42	26.64	5.52	82.5	49.8	32.5
2012-10-11 20:05:42	26.64	5.58	83.5	49.8	32.4
2012-10-11 21:05:42	26.751	5.52	83	49.8	32.6
2012-10-11 22:05:42	26.862	5.47	82.2	49.8	32.6
2012-10-11 23:05:42	26.8065	5.59	84	49.9	32.6
2012-10-12 00:05:42	26.8065	5.6	84	49.9	32.6
2012-10-12 01:05:42	26.8065	5.57	83.5	49.8	32.6
2012-10-12 02:05:42	26.6955	5.6	83.8	49.9	32.5
2012-10-12 03:05:42	26.751	5.6	83.8	49.9	32.5
2012-10-12 04:05:42	26.5845	5.57	83.3	49.9	32.5
2012-10-12 05:05:42	26.751	5.59	83.8	49.9	32.6
2012-10-12 06:05:42	26.9175	5.59	84.3	49.9	33
2012-10-12 07:05:42	26.862	5.61	84.3	49.9	32.6
2012-10-12 08:05:42	26.751	5.64	84.6	49.9	32.6
2012-10-12 09:05:42	26.6955	5.65	84.8	49.9	32.6
2012-10-12 10:05:42	26.6955	5.66	84.8	49.9	32.6
2012-10-12 11:05:42	26.751	5.62	84.3	50	32.5
2012-10-12 12:05:42	26.64	5.7	85.3	49.9	32.5
2012-10-12 13:05:42	26.6955	5.72	85.6	50	32.6
2012-10-12 14:05:42	26.9175	5.68	85.6	49.9	33
2012-10-12 15:05:42	26.8065	5.71	85.8	49.8	32.6
2012-10-12 16:05:42	26.751	5.76	86.4	49.9	32.6
2012-10-12 17:05:42	26.751	5.71	85.6	49.9	32.6
2012-10-12 18:05:42	26.6955	5.75	86.1	50	32.6
2012-10-12 19:05:42	26.6955	5.72	85.6	49.9	32.5
2012-10-12 20:05:42	26.64	5.75	86.1	49.9	32.5
2012-10-12 21:05:42	26.64	5.81	86.9	50	32.5
2012-10-12 22:05:42	26.751	5.71	85.6	49.9	32.6
2012-10-12 23:05:42	26.862	5.72	86.1	49.9	33
2012-10-13 00:05:42	26.8065	5.7	85.8	50	33
2012-10-13 01:05:42	26.8065	5.77	86.6	49.9	32.6
2012-10-13 02:05:42	26.751	5.74	86.1	49.9	32.6
2012-10-13 03:05:42	26.6955	5.75	86.1	49.9	32.6
2012-10-13 04:05:42	26.64	5.81	86.9	49.9	32.5
2012-10-13 05:05:42	26.64	5.83	87.1	50	32.5
2012-10-13 06:05:42	26.751	5.77	86.6	50	32.6
2012-10-13 07:05:42	26.862	5.72	86.1	49.9	33
2012-10-13 08:05:42	26.862	5.75	86.6	49.9	33
2012-10-13 09:05:42	26.8065	5.78	86.9	49.9	33
2012-10-13 10:05:42	26.751	5.84	87.4	50	32.6
2012-10-13 11:05:42	26.751	5.81	87.1	50	32.6
2012-10-13 12:05:42	26.751	5.97	89.2	50	32.5
2012-10-13 13:05:42	26.64	0	0	49.9	32.5
2012-10-13 14:05:42	26.64	0	0	49.9	32.5
2012-10-13 15:05:42	26.8065	0	0	50	33
2012-10-13 16:05:42	26.9175	0	0	49.9	33
2012-10-13 17:05:42	26.862	0	0	49.9	32.6
2012-10-13 18:05:42	26.862	0	0	49.9	33
2012-10-13 19:05:42	26.751	0	0	49.9	32.6
2012-10-13 20:05:42	26.6955	0	0	50	32.6
2012-10-13 21:05:42	26.6955	0	0	49.9	32.6
2012-10-13 22:05:42	26.64	0	0	49.9	32.5
2012-10-13 23:05:42	26.64	0	0	49.9	32.5
2012-10-14 00:05:42	26.6955	0	0	50	32.6
2012-10-14 01:05:42	26.9175	0	0	49.9	33
2012-10-14 02:05:42	26.862	0	0	49.9	33
2012-10-14 03:05:42	26.6955	0	0	50	33
2012-10-14 04:05:42	26.751	0	0	49.9	32.6
2012-10-14 05:05:42	26.6955	0	0	49.9	32.6
2012-10-14 06:05:42	26.64	0	0	50	32.6
2012-10-14 07:05:42	26.6955	0	0	49.9	32.5
2012-10-14 08:05:42	26.64	0	0	49.9	32.5
2012-10-14 09:05:42	26.751	0	0	49.9	32.6
2012-10-14 10:05:42	26.9175	0	0	49.9	33
2012-10-14 11:05:42	26.8065	0	0	49.9	33
2012-10-14 12:05:42	26.9175	0	0	50.1	33.1
2012-10-14 13:05:42	27.084	0	0	49.9	33.1
2012-10-14 14:05:42	27.084	0	0	49.9	33.1
2012-10-14 15:05:42	27.084	0	0	50.1	33.1
2012-10-14 16:05:42	26.9175	0	0	50.1	33.1
2012-10-14 17:05:42	26.9175	0	0	50	33
2012-10-14 18:05:42	26.973	0	0	49.9	33
2012-10-14 19:05:42	26.9175	0	0	50	33.1
2012-10-14 20:05:42	26.973	0	0	50	33
2012-10-14 21:05:42	26.973	0	0	50	33
2012-10-14 22:05:42	27.0285	0	0	50	33.1
2012-10-14 23:05:42	26.9175	0	0	49.9	33.1
2012-10-15 00:05:42	26.9175	0	0	50	33.1
2012-10-15 01:05:42	26.9175	0	0	50	33.1
2012-10-15 02:05:42	26.9175	0	0	50.1	33.1
2012-10-15 03:05:42	26.9175	0	0	50	33
2012-10-15 04:05:42	26.862	0	0	50	33
2012-10-15 05:05:42	26.8065	0	0	49.9	33
2012-10-15 06:05:42	26.862	0	0	50	33
2012-10-15 07:05:42	26.8065	0	0	49.9	33
2012-10-15 08:05:42	26.9175	0	0	50	33
2012-10-15 09:05:42	26.751	0	0	49.9	33
2012-10-15 10:05:42	26.751	0	0	50	33
2012-10-15 11:05:42	26.751	0	0	50	33
2012-10-15 12:05:42	26.8065	0	0	50.1	33
2012-10-15 13:05:42	25.863	0	0	49.7	32.6
2012-10-15 14:05:42	25.6965	0	0	49.6	32.4
2012-10-15 15:05:42	25.9185	0	0	49.7	32.6
2012-10-15 16:05:42	26.196	0	0	49.7	32.7
2012-10-15 17:05:42	26.418	0	0	49.7	32.8
2012-10-15 18:05:42	26.307	0	0	49.7	32.8
2012-10-15 19:05:42	26.307	0	0	49.7	32.8
2012-10-15 20:05:42	26.3625	0	0	49.7	32.7
2012-10-15 21:05:42	26.2515	0	0	49.7	32.8
2012-10-15 22:05:42	26.196	0	0	49.5	32.7
2012-10-15 23:05:42	26.2515	0	0	49.6	32.7
2012-10-16 00:05:42	26.1405	0	0	49.6	32.7
2012-10-16 01:05:42	26.196	0	0	49.6	32.7
2012-10-16 02:05:42	26.3625	0	0	49.7	32.9
2012-10-16 03:05:42	26.418	0	0	49.7	32.8
2012-10-16 04:05:42	26.2515	0	0	49.7	32.8
2012-10-16 05:05:42	26.307	0	0	49.7	32.8
2012-10-16 06:05:42	26.2515	0	0	49.7	32.7
2012-10-16 07:05:42	26.1405	0	0	49.7	32.7
2012-10-16 08:05:42	26.196	0	0	49.6	32.7
2012-10-16 09:05:42	26.085	0	0	49.8	32.7
2012-10-16 10:05:42	26.3625	0	0	49.7	32.9
2012-10-16 11:05:42	26.3625	0	0	49.6	32.8
2012-10-16 12:05:42	26.307	0	0	49.6	32.8
2012-10-16 13:05:42	26.2515	0	0	49.8	32.8
2012-10-16 14:05:42	26.2515	0	0	49.8	32.8
2012-10-16 15:05:42	26.196	0	0	49.6	32.7
2012-10-16 16:05:42	26.1405	0	0	49.6	32.7
2012-10-16 17:05:42	26.1405	0	0	49.6	32.7
2012-10-16 18:05:42	26.085	0	0	49.6	32.7
2012-10-16 19:05:42	26.0295	0	0	49.7	32.6
2012-10-16 20:05:42	26.0295	0	0	49.6	32.6
2012-10-16 21:05:42	26.085	0	0	49.7	32.7
2012-10-16 22:05:42	26.307	0	0	49.7	32.8
2012-10-16 23:05:42	26.418	0	0	49.7	32.9
2012-10-17 00:05:42	26.418	0	0	49.7	32.9
2012-10-17 01:05:42	26.3625	0	0	49.7	32.8
2012-10-17 02:05:42	26.307	0	0	49.7	32.8
2012-10-17 03:05:42	26.307	0	0	49.7	32.8
2012-10-17 04:05:42	26.2515	0	0	49.7	32.8
2012-10-17 05:05:42	26.196	0	0	49.7	32.7
2012-10-17 06:05:42	26.1405	0	0	49.6	32.7
2012-10-17 07:05:43	26.1405	0	0	49.6	32.7
2012-10-17 10:06:31	26.1405	0	0	49.7	32.7
2012-10-17 11:06:31	26.1405	0	0	49.6	32.7
2012-10-17 12:06:31	26.3625	0	0	49.7	32.9
2012-10-17 13:06:31	26.3625	0	0	49.7	32.9
2012-10-17 14:06:31	26.307	0	0	49.7	32.9
2012-10-17 15:06:31	26.2515	0	0	49.7	32.8
2012-10-17 16:06:31	26.2515	0	0	49.8	32.8
2012-10-17 17:06:31	26.196	0	0	49.8	32.8
2012-10-17 18:06:31	26.2515	0	0	49.8	32.8
2012-10-17 19:06:31	26.1405	0	0	49.8	32.7
2012-10-17 20:06:31	26.1405	0	0	49.7	32.7
2012-10-17 21:06:31	26.1405	0	0	49.8	32.7
2012-10-17 22:06:31	26.3625	0	0	49.8	32.9
2012-10-17 23:06:31	26.307	0	0	49.7	32.9
2012-10-18 00:06:31	26.307	0	0	49.8	32.9
2012-10-18 01:06:31	26.2515	0	0	49.8	32.8
2012-10-18 02:06:31	26.307	0	0	49.7	32.8
2012-10-18 03:06:31	26.196	0	0	49.8	32.8
2012-10-18 04:06:31	26.1405	0	0	49.8	32.8
2012-10-18 05:06:31	26.1405	0	0	49.8	32.8
2012-10-18 06:06:31	26.2515	0	0	49.7	32.8
2012-10-18 07:06:31	26.3625	0	0	49.8	32.9
2012-10-18 08:06:31	26.3625	0	0	49.7	32.9
2012-10-18 09:06:31	26.307	0	0	49.8	32.9
2012-10-18 10:06:31	26.307	0	0	49.6	32.9
2012-10-18 11:06:31	26.2515	0	0	49.7	32.9
2012-10-18 12:06:31	26.2515	0	0	49.8	32.8
2012-10-18 13:06:31	26.1405	0	0	49.7	32.7
2012-10-18 14:06:31	26.2515	0	0	49.7	32.9
2012-10-18 15:06:31	26.307	0	0	49.8	32.9
2012-10-18 16:06:31	26.2515	0	0	49.9	32.8
2012-10-18 17:06:31	26.1405	0	0	49.8	32.8
2012-10-18 18:06:31	26.3625	0	0	49.8	32.9
2012-10-18 19:06:31	26.418	0	0	49.7	32.9
2012-10-18 20:06:31	26.3625	0	0	49.9	32.9
2012-10-18 21:06:31	26.3625	0	0	49.8	32.9
2012-10-18 22:06:31	26.307	0	0	49.8	32.9
2012-10-18 23:06:31	26.1405	0	0	49.8	32.8
2012-10-19 00:06:31	26.196	0	0	49.9	32.8
2012-10-19 01:06:31	26.196	0	0	49.8	32.8
2012-10-19 02:06:31	26.196	0	0	49.8	32.8
2012-10-19 03:06:31	26.196	0	0	49.8	32.9
2012-10-19 04:06:31	26.418	0	0	49.8	32.9
2012-10-19 05:06:31	26.3625	0	0	49.9	32.9
2012-10-19 06:06:31	26.307	0	0	49.8	32.9
2012-10-19 07:06:31	26.2515	0	0	49.9	32.9
2012-10-19 08:06:31	26.2515	0	0	49.8	32.9
2012-10-19 09:06:31	26.1405	0	0	49.8	32.8
2012-10-19 10:06:31	26.0295	0	0	49.8	32.8
2012-10-19 11:06:31	26.307	0	0	49.9	32.9
2012-10-19 12:06:31	26.307	0	0	49.8	32.9
2012-10-19 13:06:31	26.3625	0	0	49.8	32.9
2012-10-19 14:06:31	26.2515	0	0	49.8	32.9
2012-10-19 15:06:31	26.196	0	0	49.9	32.9
2012-10-19 16:06:31	26.196	0	0	49.8	32.8
2012-10-20	26.3
2012-10-21	26.3
2012-10-22	26.2
2012-10-23	25.9
2012-10-24 10:07:20	25.9185	5.07	74.9	49.5	32.5
2012-10-24 11:07:20	25.863	5.05	74.6	49.5	32.5
2012-10-24 12:07:20	25.9185	5.11	75.4	49.6	32.5
2012-10-24 13:07:20	25.974	5.1	75.4	49.5	32.5
2012-10-24 14:07:20	25.9185	5.11	75.4	49.5	32.5
2012-10-24 15:07:20	25.974	5.1	75.4	49.5	32.5
2012-10-24 16:07:20	25.863	5.11	75.4	49.5	32.5
2012-10-24 17:07:20	25.9185	5.15	76.2	49.5	32.5
2012-10-24 18:07:20	25.863	5.16	76.2	49.6	32.5
2012-10-24 19:07:20	25.8075	5.16	76.2	49.5	32.5
2012-10-25	25.9
2012-10-26	25.8
2012-10-27	25.9
2012-10-28	25.9
2012-10-29	25.9
2012-10-30	24.4
2012-10-31 10:08:09	24.42	5.34	77	49.6	33.1
2012-10-31 11:08:09	24.42	5.34	77.2	49.6	33.1
2012-10-31 12:08:09	24.3645	5.31	76.7	49.6	33.1
2012-10-31 13:08:09	24.42	5.36	77.5	49.6	33.1
2012-10-31 14:08:09	24.3645	5.35	77.2	49.7	33.1
2012-10-31 15:08:09	24.42	5.33	77	49.6	33.2
2012-10-31 16:08:09	24.3645	5.33	77	49.6	33.2
2012-10-31 17:08:09	24.309	5.35	77.2	49.7	33.2
2012-10-31 18:08:09	24.0315	5.38	77	49.5	32.5
2012-10-31 19:08:09	24.309	5.31	76.7	49.6	33.1
2012-10-31 20:08:09	24.4755	5.31	76.7	49.7	33.2
2012-10-31 21:08:09	24.42	5.33	77	49.6	33.1
2012-10-31 22:08:09	24.42	5.33	77	49.6	33.2
2012-10-31 23:08:09	24.3645	5.33	77	49.7	33.2
2012-11-01 00:08:09	24.42	5.35	77.2	49.7	33.2
2012-11-01 01:08:09	24.42	5.29	76.4	49.7	33.2
2012-11-01 02:08:09	24.3645	5.29	76.4	49.7	33.2
2012-11-01 03:08:09	24.42	5.29	76.2	49.6	32.4
2012-11-01 04:08:09	24.42	5.29	76.4	49.7	33.2
2012-11-01 05:08:09	24.309	5.31	76.7	49.7	33.2
2012-11-01 06:08:09	24.3645	5.29	76.4	49.7	33.2
2012-11-01 07:08:09	24.42	5.27	76.2	49.6	33.2
2012-11-01 08:08:09	24.42	5.29	76.2	49.6	33.2
2012-11-01 09:08:09	24.309	5.29	76.2	49.6	32.4
2012-11-01 10:08:09	24.42	5.31	76.7	49.7	33.2
2012-11-01 11:08:09	24.3645	5.31	76.7	49.7	33.2
2012-11-01 12:08:09	24.309	5.29	76.2	49.6	32.4
2012-11-01 13:08:09	24.3645	5.33	77	49.7	33.2
2012-11-01 14:08:09	24.42	5.33	77	49.6	33.2
2012-11-01 15:08:09	24.3645	5.33	77	49.8	33.2
2012-11-01 16:08:09	24.3645	5.33	77	49.7	33.2
2012-11-01 17:08:09	24.42	5.32	77	49.9	33.3
2012-11-01 18:08:09	24.42	5.34	77.2	49.8	33.3
2012-11-01 19:08:09	24.42	5.33	77	49.8	33.2
2012-11-01 20:08:09	24.3645	5.34	77.2	49.7	33.2
2012-11-01 21:08:09	24.42	5.33	76.7	49.6	33.3
2012-11-01 22:08:09	24.42	5.34	77.2	49.8	33.2
2012-11-01 23:08:09	24.42	5.34	77.2	49.8	33.2
2012-11-02 00:08:09	24.42	5.34	77.2	49.6	33.2
2012-11-02 01:08:09	24.42	5.33	76.7	49.6	32.4
2012-11-02 02:08:09	24.42	5.31	76.7	49.8	33.3
2012-11-02 03:08:09	24.42	5.4	78	49.8	33.2
2012-11-02 04:08:09	24.42	5.34	77.2	49.8	33.3
2012-11-02 05:08:09	24.3645	5.38	77.8	49.8	33.3
2012-11-02 06:08:09	24.3645	5.36	77.5	49.8	33.3
2012-11-02 07:08:09	24.3645	5.36	77.5	49.8	33.3
2012-11-02 08:08:09	24.3645	5.39	78	49.8	33.3
2012-11-02 09:08:09	24.3645	5.4	78	49.8	33.3
2012-11-02 10:08:09	24.3645	5.41	78.3	49.8	33.3
2012-11-02 11:08:09	24.42	5.45	78.8	49.8	33.3
2012-11-02 12:08:09	24.4755	5.43	78.3	49.7	32.5
2012-11-02 13:08:09	24.3645	5.43	78.6	49.8	33.3
2012-11-02 14:08:09	24.3645	5.4	78	49.8	33.3
2012-11-02 15:08:09	24.309	5.39	78	49.8	33.3
2012-11-02 16:08:09	24.3645	5.42	78.3	49.8	33.3
2012-11-02 17:08:09	24.309	5.46	78.8	49.9	33.3
2012-11-02 18:08:09	24.3645	5.43	78.6	49.8	33.3
2012-11-02 19:08:09	24.42	5.45	78.8	49.8	33.3
2012-11-02 20:08:09	24.3645	5.44	78.6	49.8	33.3
2012-11-02 21:08:09	24.3645	5.44	78.6	49.8	33.3
2012-11-02 22:08:09	24.42	5.43	78.6	49.8	33.3
2012-11-02 23:08:09	24.42	5.4	77.8	49.7	33.3
2012-11-03 00:08:09	24.42	5.41	78.3	49.8	33.3
2012-11-03 01:08:09	24.42	5.43	78.6	49.9	33.3
2012-11-03 02:08:09	24.42	5.48	79.1	49.9	33.3
2012-11-03 03:08:09	24.42	5.47	79.1	49.8	33.3
2012-11-03 04:08:09	24.42	5.47	79.1	49.8	33.3
2012-11-03 05:08:09	24.42	5.44	78.6	49.8	33.3
2012-11-03 06:08:09	24.309	5.48	79.1	49.9	33.3
2012-11-03 07:08:09	24.42	5.41	78.3	49.8	33.3
2012-11-03 08:08:09	24.42	5.43	78.6	49.8	33.3
2012-11-03 09:08:09	24.42	5.39	78	49.8	33.3
2012-11-03 10:08:09	24.3645	5.44	78.6	49.8	33.3
2012-11-03 12:08:09	24.42	5.43	78.6	49.8	33.3
2012-11-03 13:08:09	24.42	5.45	78.8	49.8	33.3
2012-11-03 14:08:09	24.42	5.43	78.6	49.8	33.3
2012-11-03 15:08:09	24.42	5.39	78	49.8	33.3
2012-11-03 16:08:09	24.42	5.43	78.6	49.8	33.3
2012-11-03 17:08:09	24.3645	5.41	78.3	49.8	33.3
2012-11-03 18:08:09	24.42	5.4	78	49.8	33.2
2012-11-03 19:08:09	24.4755	5.38	77.5	49.8	32.4
2012-11-03 20:08:09	24.4755	5.4	78	49.9	32.4
2012-11-03 21:08:09	24.42	5.38	77.8	49.9	33.2
2012-11-03 22:08:09	24.531	5.4	78	49.9	32.4
2012-11-03 23:08:09	24.42	5.4	78	49.8	33.2
2012-11-04 00:08:09	24.3645	5.4	78	49.8	33.3
2012-11-04 01:08:09	24.4755	5.41	78	49.8	32.5
2012-11-04 02:08:09	24.42	5.39	78	49.8	33.3
2012-11-04 03:08:09	24.4755	5.38	77.5	49.8	32.5
2012-11-04 04:08:09	24.42	5.36	77.5	49.8	33.3
2012-11-04 05:08:09	24.3645	5.4	78	49.8	33.3
2012-11-04 06:08:09	24.3645	5.44	78.6	49.8	33.3
2012-11-04 07:08:09	24.42	5.41	78.3	49.8	33.3
2012-11-04 08:08:09	24.309	5.48	79.1	49.8	33.3
2012-11-04 09:08:09	24.309	5.48	79.1	49.9	33.3
2012-11-04 10:08:09	24.42	5.43	78.6	49.8	33.3
2012-11-04 11:08:09	24.3645	5.42	78.3	49.8	33.3
2012-11-04 12:08:09	24.309	5.5	79.1	49.9	33.3
2012-11-04 13:08:09	24.3645	5.42	78.3	49.8	33.3
2012-11-04 14:08:09	24.42	5.42	78.3	49.8	33.3
2012-11-04 15:08:09	24.309	5.39	77.8	49.9	33.3
2012-11-04 16:08:09	24.309	5.37	77.5	49.9	33.3
2012-11-04 17:08:09	24.2535	5.34	77	49.8	33.2
2012-11-04 18:08:09	24.198	5.35	77	49.9	33.2
2012-11-04 19:08:09	24.1425	5.33	76.7	49.8	33.1
2012-11-04 20:08:09	24.087	5.35	76.7	49.8	32.7
2012-11-04 21:08:09	23.976	5.34	76.4	49.8	32.7
2012-11-04 22:08:09	23.976	5.3	75.9	49.8	32.7
2012-11-04 23:08:09	24.0315	5.3	75.9	49.9	32.7
2012-11-05 00:08:09	24.087	5.33	76.2	49.9	32.7
2012-11-05 01:08:09	23.9205	5.33	76.2	50	32.7
2012-11-05 02:08:09	23.976	5.33	76.2	50	32.7
2012-11-05 03:08:09	23.9205	5.33	76.2	49.9	32.7
2012-11-05 04:08:09	23.865	5.34	76.2	49.9	32.7
2012-11-05 05:08:09	23.8095	5.36	76.4	49.9	32.7
2012-11-05 06:08:09	23.9205	5.31	75.9	49.9	32.7
2012-11-05 07:08:09	23.9205	5.34	76.2	49.9	32.7
2012-11-05 08:08:09	23.865	5.32	75.9	49.9	32.7
2012-11-05 09:08:09	23.9205	5.36	76.4	49.9	32.7
2012-11-05 10:08:09	23.9205	5.33	76.2	49.9	32.7
2012-11-05 11:08:09	23.9205	5.37	76.7	49.9	32.7
2012-11-05 12:08:09	23.865	5.37	76.7	49.9	32.7
2012-11-05 13:08:09	23.8095	5.38	76.7	49.8	32.6
2012-11-05 14:08:09	22.311	5.34	74.3	49.7	33
2012-11-05 15:08:09	22.5885	5.43	75.9	49.6	32.5
2012-11-05 16:08:09	22.977	5.48	77	49.6	32.7
2012-11-06	23.8
2012-11-07 11:15:14	23.865	5.41	77.2	49.9	32.7
2012-11-07 12:15:14	23.865	5.63	80.4	49.9	32.7
2012-11-07 13:15:14	23.9205	5.44	77.8	49.9	32.7
2012-11-07 14:15:14	23.8095	5.36	76.4	49.9	32.7
2012-11-07 15:15:14	23.9205	5.37	76.7	49.9	32.7
2012-11-07 16:15:14	23.9205	5.33	76.2	49.9	32.7
2012-11-07 17:15:14	23.865	5.43	77.5	49.9	32.7
2012-11-07 18:15:14	23.976	5.36	76.7	50	32.7
2012-11-07 19:15:14	23.9205	5.4	77.2	49.9	32.7
2012-11-07 20:15:14	23.9205	5.37	76.7	49.8	32.7
2012-11-07 21:15:14	23.865	6.02	86	49.9	32.7
2012-11-07 22:15:14	23.865	5.22	74.6	49.9	32.7
2012-11-07 23:15:14	23.9205	5.44	77.8	49.9	32.7
2012-11-08 00:15:14	23.8095	5.34	76.2	49.9	32.7
2012-11-08 01:15:14	23.865	5.46	78	49.9	32.7
2012-11-08 02:15:14	23.976	5.08	72.7	49.9	32.7
2012-11-08 03:15:14	23.9205	5.56	79.4	49.9	32.7
2012-11-08 04:15:14	23.9205	5.44	77.8	49.9	32.7
2012-11-08 05:15:14	23.865	5.61	80.1	49.9	32.7
2012-11-08 06:15:14	23.9205	5.57	79.6	49.9	32.7
2012-11-08 07:15:14	23.9205	4.65	66.4	49.9	32.7
2012-11-08 08:15:14	23.9205	5.57	79.6	49.9	32.7
2012-11-08 09:15:14	23.8095	5.45	77.8	49.9	32.7
2012-11-08 10:15:14	23.9205	5.7	81.5	49.9	32.7
2012-11-08 11:15:14	23.976	5.45	78	49.9	32.7
2012-11-08 12:15:14	23.8095	5.43	77.5	49.9	32.7
2012-11-08 13:15:14	23.8095	5.43	77.5	49.8	32.7
2012-11-08 14:15:14	23.8095	5.29	75.4	49.8	32.7
2012-11-08 15:15:14	23.865	5.3	75.7	49.8	32.7
2012-11-08 16:15:14	23.865	5.45	77.8	49.9	32.7
2012-11-08 17:15:14	23.865	5.32	75.9	49.9	32.7
2012-11-08 18:15:14	23.8095	5.29	75.4	49.9	32.7
2012-11-08 19:15:14	23.865	5.41	77.2	50	32.7
2012-11-08 20:15:14	23.976	5.27	75.4	49.9	32.7
2012-11-08 21:15:14	23.865	5.5	78.6	49.9	32.7
2012-11-08 22:15:14	23.8095	5.52	78.8	49.9	32.7
2012-11-08 23:15:14	23.9205	5.37	76.7	49.9	32.7
2012-11-09 00:15:14	23.9205	5.56	79.4	50.1	32.7
2012-11-09 01:15:14	23.865	5.39	77	49.9	32.7
2012-11-09 02:15:14	23.8095	5.17	73.8	49.9	32.7
2012-11-09 03:15:14	23.8095	5.23	74.6	49.9	32.7
2012-11-09 04:15:14	23.976	5.29	75.7	49.9	32.7
2012-11-09 05:15:14	23.865	5.2	74.3	49.9	32.7
2012-11-09 06:15:14	23.865	5.63	80.4	49.9	32.7
2012-11-09 07:15:14	23.865	5.6	79.9	50	32.7
2012-11-09 08:15:14	23.9205	5.5	78.6	49.9	32.7
2012-11-09 09:15:14	23.8095	4.91	70.1	49.9	32.7
2012-11-09 10:15:14	23.976	5.55	79.4	49.9	32.7
2012-11-09 11:15:14	23.8095	5.51	78.6	49.9	32.7
2012-11-09 12:15:14	23.8095	5.47	78	49.9	32.7
2012-11-09 13:15:14	23.976	5.51	78.8	49.9	32.7
2012-11-09 14:15:14	23.9205	5.14	73.5	49.8	32.7
2012-11-09 15:15:14	23.976	5.44	77.8	49.9	32.7
2012-11-09 16:15:14	23.9205	5.25	75.1	49.9	32.7
2012-11-09 17:15:14	23.976	5.29	75.7	49.9	32.7
2012-11-09 18:15:14	23.8095	5.54	79.1	49.7	32.7
2012-11-09 19:15:14	23.976	5.68	81.2	49.9	32.7
2012-11-09 20:15:14	23.9205	5.33	76.2	49.8	32.7
2012-11-09 21:15:14	23.9205	5.44	78	50.1	33.1
2012-11-09 22:15:14	23.976	5.47	78.3	50	32.7
2012-11-09 23:15:14	23.865	5.3	75.7	49.9	32.7
2012-11-10 00:15:14	23.976	5.55	79.4	49.9	32.7
2012-11-10 01:15:14	23.9205	5.37	76.7	49.9	32.7
2012-11-10 02:15:14	23.976	5.58	79.9	49.9	32.7
2012-11-10 03:15:14	23.9205	5.65	80.7	49.9	32.7
2012-11-10 04:15:14	23.9205	5.72	81.7	49.9	32.7
2012-11-10 05:15:14	23.9205	5.46	78	49.8	32.7
2012-11-10 06:15:14	23.9205	5.42	77.5	49.8	32.7
2012-11-10 07:15:14	23.8095	5.47	78	49.9	32.7
2012-11-10 08:15:14	23.8095	5.45	77.8	49.9	32.7
2012-11-10 09:15:14	23.9205	5.48	78.3	49.9	32.7
2012-11-10 10:15:14	23.865	5.41	77.2	49.9	32.7
2012-11-10 11:15:14	23.9205	5.4	77.2	49.9	32.7
2012-11-10 12:15:14	23.865	5.98	85.4	49.9	32.7
2012-11-10 13:15:14	23.976	5.77	82.5	49.9	32.7
2012-11-10 14:15:14	23.976	5.36	76.7	49.9	32.7
2012-11-10 15:15:14	23.976	5.14	73.5	50	32.7
2012-11-10 16:15:14	23.976	5.64	80.7	49.9	32.7
2012-11-10 17:15:14	23.976	5.55	79.4	50	32.7
2012-11-10 18:15:14	23.9205	5.53	79.1	49.9	32.7
2012-11-10 19:15:14	23.9205	5.65	80.7	50	32.7
2012-11-10 20:15:14	23.9205	5.51	78.8	50	32.7
2012-11-10 21:15:14	23.9205	5.52	79.1	50.2	33.2
2012-11-10 22:15:14	24.0315	5.38	77	49.8	32.7
2012-11-10 23:15:14	23.976	5.6	80.1	49.7	32.7
2012-11-11 00:15:14	23.9205	5.51	78.8	49.8	32.7
2012-11-11 01:15:14	23.865	5.28	75.4	49.9	32.7
2012-11-11 02:15:14	23.9205	5.37	76.7	50	32.7
2012-11-11 03:15:14	23.976	5.44	77.8	50	32.7
2012-11-11 04:15:14	23.9205	5.59	79.9	49.9	32.7
2012-11-11 05:15:14	23.9205	5.6	80.1	49.9	32.7
2012-11-11 06:15:14	23.8095	5.44	77.8	49.9	32.7
2012-11-11 07:15:14	23.865	5.46	78	50	32.7
2012-11-11 08:15:14	23.865	5.69	81.2	50	32.7
2012-11-11 09:15:14	23.9205	5.37	76.7	49.9	32.7
2012-11-11 10:15:14	23.8095	5.54	79.1	50	32.7
2012-11-11 11:15:14	23.9205	5.57	79.6	50.1	32.7
2012-11-11 12:15:14	23.865	5.55	79.4	50.1	33.1
2012-11-11 13:15:14	23.9205	5.72	81.7	49.9	32.7
2012-11-11 14:15:14	23.9205	5.7	81.5	49.9	32.7
2012-11-11 15:15:14	23.9205	5.72	81.7	50	32.7
2012-11-11 16:15:14	23.9205	5.5	78.8	50	33.2
2012-11-11 17:15:14	24.0315	5.21	74.6	50	32.7
2012-11-11 18:15:14	24.0315	5.67	81.2	49.9	32.7
2012-11-11 19:15:14	24.0315	5.42	77.8	50.1	33.1
2012-11-11 20:15:14	24.0315	5.23	75.1	49.9	33.1
2012-11-11 21:15:14	24.0315	5.38	77.2	49.9	33.1
2012-11-11 22:15:14	24.0315	5.48	78.6	49.8	33.1
2012-11-11 23:15:14	24.0315	5.37	77	49.8	32.7
2012-11-12 00:15:14	24.087	5.43	78	49.9	33.1
2012-11-12 01:15:14	24.1425	5.05	72.7	50	33.3
2012-11-12 02:15:14	24.309	5.41	78	49.9	33.2
2012-11-12 03:15:14	24.198	5.49	79.1	50	33.3
2012-11-12 04:15:14	24.3645	5.38	77.8	50	33.3
2012-11-12 05:15:14	24.4755	5.47	79.1	50	32.5
2012-11-12 06:15:14	24.3645	5.54	80.1	50	33.3
2012-11-12 07:15:14	24.42	5.35	77	49.9	33.3
2012-11-12 08:15:14	24.531	5.39	77.8	50.3	32.7
2012-11-12 09:15:14	24.5865	5.39	77.8	49.8	32.5
2012-11-12 10:15:14	24.642	5.14	74.3	50	32.6
2012-11-12 11:15:14	24.642	5.34	77.2	50	32.7
2012-11-12 12:15:14	24.4755	5.67	81.7	50	32.6
2012-11-12 13:15:14	24.2535	5.76	83.1	49.9	33.3
2012-11-12 14:15:14	24.0315	5.37	77	49.9	33.2
2012-11-12 15:15:14	23.8095	5.44	77.8	50.2	33.1
2012-11-12 16:15:14	23.5875	5.2	73.8	49.8	32.5
2012-11-12 17:15:14	23.421	5.18	73.5	49.8	33.1
2012-11-12 18:15:14	23.199	5.57	78.8	49.9	33
2012-11-12 19:15:14	23.088	5.26	74.1	49.8	32.9
2012-11-12 20:15:14	22.9215	5.25	73.8	49.9	32.8
2012-11-12 21:15:14	22.755	5.85	82	50	32.8
2012-11-12 22:15:14	22.5885	5.36	74.9	49.9	32.7
2012-11-12 23:15:14	22.533	5.52	77	50	32.7
2012-11-13 00:15:14	22.533	5.64	78.6	49.8	32.5
2012-11-13 01:15:14	22.533	5.41	75.4	49.9	32.6
2012-11-13 02:15:14	22.533	5.43	75.7	49.9	32.6
2012-11-13 03:15:14	22.533	5.52	77	49.9	32.6
2012-11-13 04:15:14	22.533	5.65	78.8	49.9	32.6
2012-11-13 05:15:14	22.533	6.03	84.1	49.9	32.6
2012-11-13 06:15:14	22.5885	5.63	78.6	50	32.6
2012-11-13 07:15:14	22.5885	5.21	72.7	50	32.7
2012-11-13 08:15:14	22.5885	5.61	78.3	49.8	32.6
2012-11-13 09:15:14	22.5885	5.74	80.1	49.9	32.6
2012-11-13 10:15:14	22.5885	5.38	75.1	49.9	32.7
2012-11-13 11:15:14	22.5885	5.66	79.1	50.1	32.7
2012-11-13 12:15:14	22.533	5.54	77.2	49.9	32.6
2012-11-13 13:15:14	22.533	5.61	78.3	50	32.7
2012-11-13 14:15:14	22.533	5.44	75.9	49.7	32.5
2012-11-13 15:15:14	22.533	5.65	78.8	49.7	32.5
2012-11-13 16:15:14	22.533	5.65	78.8	49.8	32.5
2012-11-13 17:15:14	21.9225	5.97	82.3	49.9	32.8
2012-11-13 18:15:14	21.2565	5.6	76.4	49.3	32.8
2012-11-13 19:15:14	21.7005	5.68	78	49.4	32.5
2012-11-13 20:15:14	22.1445	5.39	74.6	49.5	32.7
2012-11-13 21:15:14	22.4775	5.19	72.2	49.5	32.3
2012-11-13 22:15:15	22.4775	5.58	77.5	49.7	33.1
2012-11-13 23:15:14	22.422	5.63	78.6	49.6	33
2012-11-14 00:15:14	22.422	5.44	75.9	49.5	33
2012-11-14 01:15:14	22.422	5.56	77.5	49.6	33
2012-11-14 02:15:14	22.422	5.83	81.2	49.6	33
2012-11-14 03:15:14	22.3665	5.7	79.4	49.5	33
2012-11-14 04:15:14	22.311	5.45	75.9	49.6	32.9
2012-11-14 05:15:14	22.311	5.7	79.4	49.6	33
2012-11-14 06:15:14	22.311	6.13	85.4	49.6	33
2012-11-14 07:15:14	22.2555	5.92	82.3	49.6	33
2012-11-14 08:15:14	22.2555	5.98	83.1	49.4	32.8
2012-11-14 09:15:14	22.2	5.85	81.2	49.6	33
2012-11-14 11:16:01	22.1445	5.53	76.7	49.5	32.8
2012-11-14 12:16:01	22.2	5.73	79.6	49.7	33
2012-11-14 13:16:01	22.2	6.03	83.6	49.5	32.8
2012-11-14 14:16:01	22.422	5.63	78.6	49.6	33
2012-11-14 15:16:01	22.422	5.58	77.8	49.6	33
2012-11-14 16:16:01	22.3665	5.68	79.1	49.6	33
2012-11-14 17:16:01	22.3665	5.6	78	49.5	33
2012-11-14 18:16:01	22.311	5.13	71.4	49.8	33.1
2012-11-14 19:16:01	22.311	5.43	75.7	49.6	33
2012-11-14 20:16:01	22.311	5.42	75.4	49.6	33
2012-11-14 21:16:01	22.311	5.47	76.2	49.7	33.1
2012-11-14 22:16:01	22.311	5.74	79.9	49.6	33
2012-11-14 23:16:01	22.2	5.07	70.6	49.6	33
2012-11-15 00:16:01	22.1445	4.99	69.3	49.6	32.9
2012-11-15 01:16:01	22.089	5.37	74.6	49.7	33
2012-11-15 02:16:01	22.1445	5.38	74.6	49.5	32.9
2012-11-15 03:16:01	22.311	5.62	78.3	49.7	33
2012-11-15 04:16:01	22.422	5.65	78.8	49.6	33
2012-11-15 05:16:01	22.3665	5.55	77.2	49.7	33
2012-11-15 06:16:01	22.311	5.29	73.8	49.6	33
2012-11-15 07:16:01	22.2555	5.38	74.9	49.7	33
2012-11-15 08:16:01	22.311	5.68	79.1	49.6	33
2012-11-15 09:16:01	22.2555	5.61	78	49.6	33
2012-11-15 10:16:01	22.2555	5.65	78.6	49.6	33
2012-11-15 11:16:01	22.2	5.54	77	49.6	32.9
2012-11-15 12:16:01	22.2	5.64	78.3	49.5	32.8
2012-11-15 13:16:01	22.2	5.34	74.1	49.6	32.9
2012-11-15 14:16:01	22.2	5.94	82.3	49.6	32.9
2012-11-15 15:16:01	22.311	5.67	78.8	49.7	33
2012-11-15 16:16:01	22.422	5.84	81.5	49.6	33
2012-11-15 17:16:01	22.422	5.56	77.5	49.6	33
2012-11-15 18:16:01	22.3665	5.71	79.6	49.5	33
2012-11-15 19:16:01	22.3665	5.58	77.8	49.6	33
2012-11-15 20:16:01	22.311	6.25	87	49.7	33
2012-11-15 21:16:01	22.311	6.19	86.2	49.6	33
2012-11-15 22:16:01	22.311	5.51	76.7	49.7	33
2012-11-15 23:16:01	22.311	5.39	75.1	49.6	33
2012-11-16 00:16:01	22.2555	6.05	84.1	49.6	32.9
2012-11-16 01:16:01	22.2	5.31	73.8	49.7	33
2012-11-16 02:16:01	22.2	5.67	78.8	49.7	33
2012-11-16 03:16:01	22.2	5.6	77.8	49.7	33
2012-11-16 04:16:01	22.1445	5.72	79.4	49.7	33
2012-11-16 05:16:01	22.1445	5.17	71.7	49.8	33
2012-11-16 06:16:01	22.089	5.84	80.9	49.7	32.9
2012-11-16 07:16:01	22.0335	5.98	82.8	49.8	33
2012-11-16 08:16:01	22.0335	5.65	78.3	49.8	33
2012-11-16 09:16:01	22.2	6.13	85.2	49.8	33
2012-11-16 10:16:01	22.4775	5.83	81.2	49.8	32.5
2012-11-16 11:16:01	22.422	5.98	83.1	49.9	33.2
2012-11-16 12:16:01	22.4775	5.75	80.4	49.7	33.2
2012-11-16 13:16:01	22.422	6.01	83.9	49.6	33.1
2012-11-16 14:16:01	22.3665	5.86	81.7	49.7	33.1
2012-11-16 15:16:01	22.3665	5.37	74.9	49.7	33.2
2012-11-16 16:16:01	22.3665	5.8	80.9	49.7	33.1
2012-11-16 17:16:01	22.311	5.47	76.2	49.7	33
2012-11-16 18:16:01	22.2555	5.93	82.5	49.8	33
2012-11-16 19:16:01	22.311	5.62	78.3	49.7	33
2012-11-16 20:16:01	22.2555	5.48	76.2	49.7	33
2012-11-16 21:16:01	22.2555	5.61	78	49.7	33
2012-11-16 22:16:01	22.2	5.88	81.7	49.8	33
2012-11-16 23:16:01	22.2	6.02	83.6	49.8	33
2012-11-17 00:16:01	22.1445	6.2	86	49.6	32.8
2012-11-17 01:16:01	22.1445	5.5	76.4	49.7	33
2012-11-17 02:16:01	22.1445	5.83	80.9	49.6	32.9
2012-11-17 03:16:01	22.089	5.57	77.2	49.8	33
2012-11-17 04:16:01	22.089	5.65	78.3	49.7	32.9
2012-11-17 05:16:01	22.0335	5.5	76.2	49.7	32.9
2012-11-17 06:16:01	22.0335	5.77	79.9	49.7	32.9
2012-11-17 07:16:01	22.422	5.84	81.5	49.9	33.2
2012-11-17 08:16:01	22.4775	5.74	79.9	49.8	32.5
2012-11-17 09:16:01	22.422	5.68	79.4	49.9	33.2
2012-11-17 10:16:01	22.422	5.68	79.4	49.9	33.2
2012-11-17 11:16:01	22.422	5.28	73.8	49.8	33.2
2012-11-17 12:16:01	22.422	5.65	78.8	49.7	33.1
2012-11-17 13:16:01	22.3665	5.65	78.8	49.7	33.1
2012-11-17 14:16:01	22.3665	5.73	79.9	49.6	33
2012-11-17 15:16:01	22.311	5.42	75.4	49.8	33.1
2012-11-17 16:16:01	22.311	5.53	77	49.7	33
2012-11-17 17:16:01	22.311	5.51	76.7	49.8	33.1
2012-11-17 18:16:01	22.2555	5.82	80.9	49.7	33
2012-11-17 19:16:01	22.311	5.68	79.1	49.7	33
2012-11-17 20:16:01	22.2555	5.69	79.1	49.7	33
2012-11-17 21:16:01	22.2	5.66	78.6	49.8	33
2012-11-17 22:16:01	22.2	5.48	76.2	49.7	33
2012-11-17 23:16:01	22.2	5.81	80.7	49.5	32.9
2012-11-18 00:16:01	22.1445	5.82	80.7	49.6	32.9
2012-11-18 01:16:01	22.1445	5.76	79.9	49.6	32.9
2012-11-18 02:16:01	22.1445	5.77	80.1	49.6	32.9
2012-11-18 03:16:01	22.089	5.8	80.4	49.7	32.9
2012-11-18 04:16:01	22.089	5.97	82.8	49.7	32.9
2012-11-18 05:16:01	22.0335	5.54	76.7	49.8	32.9
2012-11-18 06:16:01	22.089	5.85	81.2	49.8	33
2012-11-18 07:16:01	22.4775	5.79	80.7	49.8	32.5
2012-11-18 08:16:01	22.4775	5.74	79.9	49.8	32.5
2012-11-18 09:16:01	22.422	5.89	82.3	49.8	33.2
2012-11-18 10:16:01	22.422	5.61	78.3	49.8	33.2
2012-11-18 11:16:01	22.422	6.1	85.2	49.8	33.2
2012-11-18 12:16:01	22.2555	5.33	74.1	49.7	33
2012-11-18 13:16:01	22.089	5.65	78.3	49.7	32.9
2012-11-18 14:16:01	21.9225	5.79	79.9	49.4	32.6
2012-11-18 15:16:01	21.7005	5.7	78.3	49.5	32.6
2012-11-18 16:16:01	21.5895	5.65	77.5	49.5	32.5
2012-11-18 17:16:01	21.5895	5.62	77	49.4	32.3
2012-11-18 18:16:01	21.5895	5.77	79.1	49.6	32.5
2012-11-18 19:16:01	21.5895	5.73	78.6	49.7	32.6
2012-11-19	21.8
2012-11-20	20.8
2012-11-21 11:16:48	21.423	5.36	73.5	49.4	33
2012-11-21 12:16:48	21.423	5.65	77.5	49.3	33
2012-11-21 13:16:48	21.423	5.81	79.6	49.4	33
2012-11-21 14:16:48	21.4785	5.3	72.7	49.4	32.3
2012-11-21 15:16:48	21.423	6.16	84.4	49.3	32.9
2012-11-21 16:16:48	21.423	5.92	81.2	49.5	33
2012-11-21 17:16:48	21.423	5.88	80.4	49.2	32.8
2012-11-21 18:16:48	21.4785	5.64	77	49.2	32.1
2012-11-21 19:16:48	21.423	5.83	79.9	49.4	33
2012-11-21 20:16:48	21.423	5.8	79.4	49.4	33
2012-11-21 21:16:48	21.423	5.69	78	49.4	33
2012-11-21 22:16:48	21.423	6.6	90.5	49.4	33
2012-11-21 23:16:48	21.423	5.81	79.6	49.3	32.9
2012-11-22 00:16:48	21.423	5.75	78.8	49.4	33
2012-11-22 01:16:48	21.3675	5.6	76.7	49.4	33
2012-11-22 02:16:48	21.4785	5.63	77.2	49.5	32.4
2012-11-22 03:16:48	21.423	6.28	86	49.4	33
2012-11-22 04:16:48	21.4785	5.59	76.4	49.4	32.3
2012-11-22 05:16:48	21.423	5.54	75.9	49.4	33
2012-11-22 06:16:48	21.423	6.14	84.1	49.4	33
2012-11-22 07:16:48	21.423	6.1	83.6	49.4	33
2012-11-22 08:16:48	21.3675	6.28	86	49.3	33
2012-11-22 09:16:48	21.2565	5.93	81.2	49.3	32.9
2012-11-22 10:16:48	21.423	5.6	76.7	49.4	33
2012-11-22 11:16:48	21.423	5.85	80.1	49.5	33
2012-11-22 12:16:48	21.3675	5.84	79.9	49.3	32.9
2012-11-22 13:16:48	21.423	5.75	78.8	49.3	32.9
2012-11-22 14:16:48	21.4785	5.63	77.2	49.4	33
2012-11-22 15:16:48	21.3675	6.41	87.8	49.3	33
2012-11-22 16:16:48	21.423	5.69	77.8	49.2	33
2012-11-22 17:16:48	21.3675	5.42	74.3	49.4	32.9
2012-11-22 18:16:48	21.3675	5.98	82	49.4	33
2012-11-22 19:16:48	21.4785	5.73	78.3	49.2	32.3
2012-11-22 20:16:48	21.4785	5.27	72.2	49.4	32.3
2012-11-22 21:16:48	21.3675	6.14	83.9	49.3	33
2012-11-22 22:16:48	21.4785	5.8	79.4	49.4	33
2012-11-22 23:16:48	21.4785	5.83	79.9	49.4	32.3
2012-11-23 00:16:48	21.5895	5.71	78	49.3	32.3
2012-11-23 01:16:48	21.4785	5.91	80.7	49.3	32.3
2012-11-23 02:16:48	21.4785	5.67	77.5	49.4	32.3
2012-11-23 03:16:48	21.534	5.95	81.5	49.2	32.3
2012-11-23 04:16:48	21.4785	5.19	70.9	49.3	32.3
2012-11-23 05:16:48	21.4785	5.88	80.4	49.3	32.3
2012-11-23 06:16:48	21.4785	5.86	80.1	49.3	32.3
2012-11-23 07:16:48	21.4785	5.96	81.5	49.3	32.3
2012-11-23 08:16:48	21.4785	6.27	85.7	49.3	32.3
2012-11-23 09:16:48	21.423	5.51	75.4	49.4	32.9
2012-11-23 10:16:48	21.423	5.69	78	49.4	33
2012-11-23 11:16:48	21.3675	6.07	83.1	49.3	33
2012-11-23 12:16:48	21.423	5.54	75.9	49.3	33
2012-11-23 13:16:48	21.423	5.96	81.7	49.3	32.9
2012-11-23 14:16:48	21.312	6.16	84.4	49.3	33
2012-11-23 15:16:48	21.423	5.95	81.5	49.4	33
2012-11-23 16:16:48	21.423	5.24	71.7	49.5	33
2012-11-23 17:16:48	21.423	5.54	75.9	49.6	33
2012-11-23 18:16:48	21.423	5.57	76.4	49.4	33
2012-11-23 19:16:48	21.4785	5.79	79.1	49.3	32.3
2012-11-23 20:16:48	21.312	6.34	86.8	49.4	33
2012-11-23 21:16:48	21.3675	6.07	83.1	49.3	33
2012-11-23 22:16:48	21.4785	5.27	72.2	49.5	33
2012-11-23 23:16:48	21.423	5.83	79.9	49.4	33
2012-11-24 00:16:48	21.423	5.71	78.3	49.5	33
2012-11-24 01:16:48	21.423	5.96	81.7	49.4	33
2012-11-24 02:16:48	21.423	5.79	79.4	49.5	33
2012-11-24 03:16:48	21.423	5.83	79.9	49.4	33
2012-11-24 04:16:48	21.423	6.25	85.7	49.4	33
2012-11-24 05:16:48	21.423	5.54	75.7	49.3	32.3
2012-11-24 06:16:48	21.423	6.23	85.4	49.4	33
2012-11-24 07:16:48	21.423	5.81	79.6	49.4	32.9
2012-11-24 08:16:48	21.423	5.68	77.8	49.4	33
2012-11-24 09:16:48	21.423	6.23	85.4	49.5	33
2012-11-24 10:16:48	21.423	5.54	75.9	49.4	33
2012-11-24 11:16:48	21.423	5.65	77.5	49.3	33
2012-11-24 12:16:48	21.423	6.07	83.1	49.4	33
2012-11-24 13:16:48	21.3675	6.02	82.5	49.4	33
2012-11-24 14:16:48	21.423	5.69	78	49.6	33.1
2012-11-24 15:16:48	21.423	5.74	78.6	49.4	33
2012-11-24 16:16:48	21.423	5.48	75.1	49.4	33
2012-11-24 17:16:48	21.3675	6.15	84.1	49.4	32.3
2012-11-24 18:16:48	21.423	6.08	83.3	49.5	33
2012-11-24 19:16:48	21.423	6.14	84.1	49.4	33
2012-11-24 20:16:48	21.423	5.75	78.6	49.3	33
2012-11-24 21:16:48	21.423	6.25	85.7	49.5	33
2012-11-24 22:16:48	21.4785	5.45	74.6	49.4	33
2012-11-24 23:16:48	21.423	5.71	78.3	49.5	33
2012-11-25 00:16:48	21.423	6.19	84.6	49.2	33
2012-11-25 01:16:48	21.423	5.68	77.8	49.4	33
2012-11-25 02:16:48	21.423	5.81	79.6	49.4	33
2012-11-25 03:16:48	21.423	5.52	75.7	49.5	33
2012-11-25 04:16:48	21.423	6.23	85.4	49.4	33
2012-11-25 05:16:48	21.3675	5.35	73.3	49.4	33
2012-11-25 06:16:48	21.423	5.78	79.1	49.4	33
2012-11-25 07:16:48	21.423	5.63	77	49.3	32.3
2012-11-25 08:16:48	21.3675	6.03	82.5	49.4	33
2012-11-25 09:16:48	21.423	5.55	75.9	49.4	32.3
2012-11-25 10:16:48	21.423	5.74	78.6	49.5	33
2012-11-25 11:16:48	21.423	5.48	75.1	49.5	33
2012-11-25 12:16:48	21.423	6.04	82.8	49.4	32.3
2012-11-25 13:16:48	21.4785	6.02	82.3	49.4	32.3
2012-11-25 14:16:48	21.423	5.63	77.2	49.4	33
2012-11-25 15:16:48	21.2565	5.72	78.3	49.5	33
2012-11-25 16:16:48	21.201	5.64	77	49.5	32.9
2012-11-25 17:16:48	21.09	5.87	79.9	49.4	32.8
2012-11-25 18:16:48	21.0345	5.68	77.2	49.2	32.6
2012-11-25 19:16:48	20.868	6.18	83.6	49.5	32.6
2012-11-25 20:16:48	20.7015	5.61	75.7	49.4	32.5
2012-11-25 21:16:48	20.535	6.31	84.9	49.6	32.5
2012-11-25 22:16:48	20.4795	5.76	77.2	49.3	32
2012-11-25 23:16:48	20.424	6.1	82	49.5	32.7
2012-11-26 00:16:48	20.3685	5.86	78.6	49.6	33.1
2012-11-26 01:16:48	20.2575	5.3	70.9	49.2	32.5
2012-11-26 02:16:48	20.1465	5.41	72.2	49.1	32.4
2012-11-26 03:16:48	20.091	5.91	78.8	49.1	32.4
2012-11-26 04:16:48	20.1465	5.9	78.8	49.3	32.6
2012-11-26 05:16:48	20.1465	5.89	78.6	49.1	32.4
2012-11-26 06:16:48	20.202	8.29	110	49.1	32.4
2012-11-26 07:16:48	20.2575	5.75	77	49.2	32.5
2012-11-26 08:16:48	20.313	6.22	83.1	49.2	32.4
2012-11-26 09:16:48	20.1465	5.86	78.3	49.1	32.4
2012-11-26 10:16:48	20.313	5.9	78.8	49.2	32.4
2012-11-26 11:16:48	20.2575	5.88	78.6	49.2	32.4
2012-11-26 12:16:48	20.2575	5.85	78.3	49.2	32.5
2012-11-26 13:16:48	20.313	5.86	78.6	49.3	32.6
2012-11-26 14:16:48	20.3685	5.67	75.9	49.3	32.6
2012-11-26 15:16:48	19.1475	6.05	79.4	49.4	32.7
2012-11-26 16:16:48	19.758	5.81	76.7	49.3	32.1
2012-11-26 17:16:48	20.0355	5.99	79.6	49	32.2
2012-11-26 18:16:48	19.98	6.58	87.6	49.2	32.3
2012-11-26 19:16:48	19.9245	6.03	79.9	49.2	32.2
2012-11-26 20:16:48	20.091	5.77	77	49.3	32.4
2012-11-26 21:16:48	20.0355	5.4	71.9	49.2	32.4
2012-11-26 22:16:48	19.98	5.57	74.1	49.2	32.4
2012-11-26 23:16:48	20.0355	6.19	82.5	49.3	32.4
2012-11-27 00:16:48	20.0355	5.71	76.2	49.1	32.4
2012-11-27 01:16:48	20.1465	5.93	79.1	49	32.4
2012-11-27 02:16:48	20.091	6.32	84.4	49.1	32.4
2012-11-27 03:16:48	20.1465	5.94	79.4	49.2	32.4
2012-11-27 04:16:48	20.1465	6.1	81.5	49.2	32.4
2012-11-27 05:16:48	20.1465	5.61	74.9	49.3	32.5
2012-11-27 06:16:48	20.2575	5.79	77.5	49.4	32.5
2012-11-27 07:16:48	20.1465	5.77	77.2	49.2	32.5
2012-11-27 08:16:48	20.202	6.39	85.4	49.2	32.5
2012-11-27 09:16:48	20.1465	5.11	68.2	49.5	32.6
2012-11-27 10:16:48	20.202	5.52	73.8	49.5	32.6
2012-11-27 11:16:48	20.2575	5.8	77.5	49.5	32.6
2012-11-27 12:16:48	20.2575	6.03	80.7	49.5	32.6
2012-11-27 13:16:48	20.202	5.58	74.6	49.6	32.6
2012-11-27 14:16:48	20.313	6	80.4	49.3	32.6
2012-11-27 15:16:48	20.313	6.3	84.4	49.3	32.6
2012-11-27 16:16:48	20.313	6.12	82	49.3	32.6
2012-11-27 17:16:48	20.313	6.17	82.8	49.5	32.7
2012-11-27 18:16:48	20.2575	6.06	81.2	49.4	32.7
2012-11-27 19:16:48	20.313	5.83	78.3	49.7	33.1
2012-11-27 20:16:48	20.424	5.79	77.5	49.6	32.7
2012-11-27 21:16:48	20.313	6.2	83.1	49.5	32.7
2012-11-27 22:16:48	20.202	5.83	78	49.3	32.6
2012-11-27 23:16:48	20.0355	6	80.1	49.4	32.5
2012-11-28 00:16:48	20.0355	5.79	77.5	49.2	32.5
2012-11-28 01:16:48	20.091	5.51	73.5	49.4	32.6
2012-11-28 02:16:48	20.0355	5.69	75.9	49.3	32.6
2012-11-28 03:16:48	20.1465	5.52	73.8	49.5	32.6
2012-11-28 04:16:48	20.2575	5.43	72.7	49.5	32.6
2012-11-28 05:16:48	20.2575	5.73	76.7	49.3	32.5
2012-11-28 06:16:49	20.202	5.98	80.1	49.6	32.7
2012-11-28 07:16:48	20.2575	5.47	73.3	49.5	32.6
2012-11-28 11:17:35	20.2575	5.79	77.5	49.2	32.6
2012-11-28 12:17:35	20.1465	6.04	80.7	49.3	32.5
2012-11-28 13:17:35	20.1465	5.71	76.2	49.1	32.5
2012-11-28 14:17:35	20.2575	6.52	87.3	49.4	32.6
2012-11-28 15:17:35	20.1465	6.26	83.6	49.3	32.5
2012-11-28 16:17:35	20.2575	6.24	83.6	49.3	32.5
2012-11-28 17:17:35	20.202	5.52	73.8	49.6	32.7
2012-11-28 18:17:35	20.1465	5.44	72.7	49.3	32.6
2012-11-28 19:17:35	20.2575	6.11	81.7	49.2	32.5
2012-11-28 20:17:35	20.2575	5.53	74.1	49.6	32.7
2012-11-28 21:17:35	20.3685	5.4	72.5	49.4	32.6
2012-11-28 22:17:35	20.2575	5.65	75.7	49.5	32.7
2012-11-28 23:17:35	20.3685	6.79	91	49.5	32.7
2012-11-29 00:17:35	20.2575	5.81	77.8	49.5	32.7
2012-11-29 01:17:35	20.424	6.08	81.7	49.6	32.7
2012-11-29 02:17:35	20.313	6.35	85.2	49.6	32.7
2012-11-29 03:17:35	20.4795	5.93	79.9	49.6	32.4
2012-11-29 04:17:35	20.646	6.17	83.1	49.5	32.5
2012-11-29 05:17:35	20.5905	5.97	80.4	49.5	32.5
2012-11-29 06:17:35	20.7015	5.99	80.9	49.6	32.6
2012-11-29 07:17:35	20.757	5.85	79.1	49.5	32.6
2012-11-29 08:17:35	20.9235	6.01	81.5	49.5	32.6
2012-11-29 09:17:35	20.9235	5.69	77.2	49.6	32.8
2012-11-29 10:17:35	20.979	5.96	80.9	49.5	32.8
2012-11-29 11:17:35	20.9235	5.95	80.7	49.5	32.8
2012-11-29 12:17:35	21.0345	5.52	75.1	49.5	32.8
2012-11-29 13:17:35	20.8125	4.93	66.7	49.4	32.8
2012-11-29 14:17:35	20.8125	5.48	74.1	49.4	32.6
2012-11-29 15:17:35	20.5905	6.05	81.5	49.6	32.5
2012-11-29 16:17:35	20.535	5.63	75.7	49.4	32.4
2012-11-29 17:17:35	20.424	6.07	81.7	49.6	33.1
2012-11-29 18:17:35	20.313	6.05	81.2	49.6	32.7
2012-11-29 19:17:35	20.313	5.88	78.8	49.6	32.7
2012-11-29 20:17:35	20.091	6.24	83.3	49.6	32.7
2012-11-29 21:17:35	20.091	5.77	77	49.3	32.4
2012-11-29 22:17:35	20.1465	5.84	78	49.2	32.5
2012-11-29 23:17:35	20.091	6.2	82.8	49.3	32.6
2012-11-30 00:17:35	20.202	5.48	73.3	49.3	32.5
2012-11-30 01:17:35	20.1465	5.9	78.8	49.3	32.5
2012-11-30 02:17:35	20.202	6.09	81.5	49.7	32.7
2012-11-30 03:17:35	20.1465	6.3	84.1	49.3	32.6
2012-11-30 04:17:35	20.202	5.69	76.2	49.5	32.7
2012-11-30 05:17:35	20.2575	5.35	71.7	49.6	32.7
2012-11-30 06:17:35	20.313	5.91	79.4	49.6	32.7
2012-11-30 07:17:35	20.424	5.57	74.9	49.6	32.7
2012-11-30 08:17:35	20.313	5.64	75.7	49.6	32.7
2012-11-30 09:17:35	20.3685	6.09	82	49.7	33.1
2012-11-30 10:17:35	20.2575	5.95	79.9	49.7	32.7
2012-11-30 11:17:35	20.091	6	80.1	49.6	32.7
2012-11-30 12:17:35	20.202	5.79	77.5	49.7	32.7
2012-11-30 13:17:35	20.202	5.83	78	49.6	32.7
2012-11-30 14:17:35	20.202	5.83	78	49.5	32.6
2012-11-30 15:17:35	20.2575	6.09	81.5	49.5	32.7
2012-11-30 16:17:35	20.313	5.74	77	49.6	32.7
2012-11-30 17:17:35	20.2575	6.16	82.5	49.5	32.7
2012-11-30 18:17:35	20.3685	5.93	79.6	49.7	32.7
2012-11-30 19:17:35	20.2575	5.63	75.4	49.6	32.7
2012-11-30 20:17:35	20.424	5.59	75.1	49.6	32.7
[truncated: 68 more rows]
